# Supplementary material for: Quadruple C-H activation coupled to hydrofunctionalization and C-H silylation/borylation enabled by weakly coordinated palladium catalyst
Source: PubMed Central journal article supplement (PMC7652853; doi:10.1038/s41467-020-19508-z), 2020-11-09
Supplement: 41467_2020_19508_MOESM1_ESM.pdf [file 41467_2020_19508_MOESM1_ESM.pdf]

## Supplementary Information

### **Quadruple C-H Activation Coupled to Hydrofunctionalization and C-H Silylation/Borylation Enabled by Weakly Coordinated Palladium Catalyst**

Bo-Cheng Tang<sup>a</sup>, Wen-Xuan Lin<sup>b</sup>, Xiang-Long Chen<sup>a</sup>, Cai He<sup>a</sup>, Jin-Tian Ma<sup>a</sup>, Yan-Dong Wu<sup>a</sup>, Yu Lan<sup>\*bc</sup> and An-Xin Wu<sup>\*a</sup>

<sup>a</sup>Key Laboratory of Pesticide & Chemical Biology, Ministry of Education, College of Chemistry, Central China Normal University, Wuhan 430079, P. R. China.

<sup>b</sup>College of Chemistry and Institute of Green Catalysis, Zhengzhou University, 100 Science Avenue, Zhengzhou, Henan, 450001, P. R. China

<sup>c</sup>School of Chemistry and Chemical Engineering, and Chongqing Key Laboratory of Theoretical and Computational Chemistry, Chongqing University, Chongqing 400030, P.R.China.

E-mail: chwuax@mail.ccnu.edu.cn. lanyu@cqu.edu.cn.

| <b>Table of Contents</b>         | <b>page</b> |
|----------------------------------|-------------|
| 1. Supplementary Notes.....      | 2           |
| 2. Supplementary Methods.....    | 2           |
| 3. Supplementary Tables.....     | 3           |
| 4. Supplementary Figures.....    | 7           |
| 5. Supplementary References..... | 236         |

## 1. Supplementary Notes

Pd(OAc)<sub>2</sub> was purchased from Energy Chemical, alkenes were synthesized by previous reports.<sup>[1]</sup> Besides, all substrates and reagents were commercially available and used without further purification. TLC analysis was performed using pre-coated glass plates. Column chromatography was performed using silica gel (200–300 mesh). <sup>1</sup>H spectra were recorded in CDCl<sub>3</sub>, CD<sub>2</sub>Cl<sub>2</sub> and DMSO-*d*<sub>6</sub> on 600/400 MHz NMR spectrometers and resonances (δ) are given in parts per million relative to tetramethylsilane. Data are reported as follows: chemical shift, multiplicity (s = singlet, d = doublet, t = triplet, m = multiplet), coupling constants (Hz) and integration. <sup>13</sup>C spectra were recorded in CDCl<sub>3</sub>, CD<sub>2</sub>Cl<sub>2</sub> and DMSO-*d*<sub>6</sub> on 150/100 MHz NMR spectrometers and resonances (δ) are given in ppm. HRMS were obtained on a Bruker 7-tesla FT-ICR MS equipped with an electrospray source. The X-ray crystal-structure determinations were obtained on a Bruker SMART APEX CCD system.

## 2. Supplementary Methods

### 2.1 General procedure for synthesis of 4-54 (4 as an example)

A 25ml Schlenk-type tube (with a Teflon screw cap and a side arm) equipped with a magnetic stir bar was charged with the mixture of alkene (0.1 mmol), iodobenzene (0.4 mmol), Pd(OAc)<sub>2</sub> (5 mol%), Na<sub>2</sub>CO<sub>3</sub> (0.2mmol), H<sub>2</sub>O (40μL) in DMF (2 mL). The reaction was frozen with the liquid nitrogen and then the tube was evacuated and backfilled with nitrogen (5 times). The mixture was first stirred at room temperature for 10 minutes and then stirred at 110°C for 12 hours. After cooling to room temperature, the mixture was quenched with water (25 mL), extracted with EtOAc (3 × 50 mL), the combined organic layers were washed with brine, dried over anhydrous Na<sub>2</sub>SO<sub>4</sub> and concentrated under reduced pressure. The crude product was purified by column chromatography on silica gel (eluent: petroleum ether/EtOAc) to afford the products **4**.

### 2.2 General procedure for synthesis of 55-102 (69 as an example)

A 25ml Schlenk-type tube (with a Teflon screw cap and a side arm) equipped with a magnetic stir bar was charged with the mixture of alkene (0.1 mmol), iodobenzene (0.15 mmol), TMS-TMS (0.2mmol), Pd(OAc)<sub>2</sub> (5 mol%), K<sub>2</sub>CO<sub>3</sub> (0.15mmol), Me<sub>4</sub>NOAc (0.1mmol) in DMF (2 mL). The reaction was frozen with the liquid nitrogen and then the tube was evacuated and backfilled with nitrogen (5 times). The mixture was first stirred at room temperature for 10 minutes and then stirred at 70°C for 12 hours. After cooling to room temperature, the mixture was quenched with water (25 mL), extracted with EtOAc (3 × 50 mL), the combined organic layers were washed with brine, dried over anhydrous Na<sub>2</sub>SO<sub>4</sub> and concentrated under reduced pressure. The crude product was purified by column chromatography on silica gel (eluent: petroleum ether/EtOAc) to afford the products **69**.

### 2.3 General procedure for synthesis of 103-135 (103 as an example)

A 25ml Schlenk-type tube (with a Teflon screw cap and a side arm) equipped with a magnetic stir bar was charged with the mixture of alkene (0.1 mmol), iodobenzene (0.15 mmol), B<sub>2</sub>Pin<sub>2</sub> (0.2mmol), Pd(OAc)<sub>2</sub> (5 mol%), PivOK (0.2mmol) in DMF (2 mL). The reaction was frozen with the liquid nitrogen and then the tube was evacuated and backfilled with nitrogen (5 times). The mixture was first stirred at room temperature for 10 minutes and then stirred at 100°C for 12 hours. After cooling to room temperature, the mixture was quenched with water (25 mL), extracted with EtOAc (3 × 50 mL), the combined organic layers were washed with brine, dried over anhydrous Na<sub>2</sub>SO<sub>4</sub> and concentrated under reduced pressure. The crude product was purified by column chromatography on silica gel (eluent: petroleum ether/EtOAc) to afford the products **103**.

### 3. Supplementary Tables

#### 3.1 Optimization of the Reaction Conditions for synthesis of **4**

We first tested several bases and palladium sources; Na<sub>2</sub>CO<sub>3</sub> and Pd(OAc)<sub>2</sub> were optimal for formation of **4** (Supplementary Table 2). Compound **3** probably forms via a migration insertion, β-H elimination, reinsertion, and nucleophilic cyclization sequence. Reduced temperature promotes formation of **3** whereas higher temperature favors **4** (Supplementary Table 1, entries 1-6). Distinct from the typical domino-type C-H activation reaction, we observed no monoarylation, diarylation, or simple β-H elimination product in this reaction. Next, we investigated the dosage of PhI. Reducing the amounts of PhI to less than 3eq, or increasing it to greater than 4eq, sharply decreased the yield of **4**. Therefore, we chose 4eq of PhI as the best dosage, although some homo-coupling product of PhI was observed (Supplementary Table 1, entries 7-11). Not surprisingly, only dipolar solvents were compatible with this reaction (Supplementary Table 1, entries 12-18). However, although DMSO functioned well with model substrates, it was suboptimal in additional tests of substrate scope. Thus, we selected DMF as the optimal solvent.

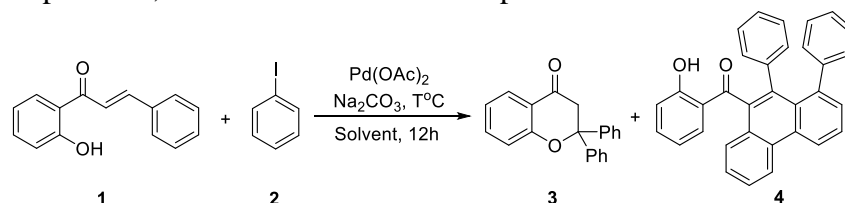

| Entry | Temp.(°C) | Equiv. (PhI) | Solvent | <b>3</b> [%] <sup>a</sup> | <b>4</b> [%] <sup>a</sup> |
|-------|-----------|--------------|---------|---------------------------|---------------------------|
| 1     | 25        | 4            | DMF     | 56                        | 15                        |
| 2     | 50        | 4            | DMF     | 52                        | 18                        |
| 3     | 70        | 4            | DMF     | 42                        | 44                        |
| 4     | 90        | 4            | DMF     | 16                        | 73                        |
| 5     | 110       | 4            | DMF     | <5                        | 85                        |
| 6     | 130       | 4            | DMF     | <5                        | 81                        |
| 7     | 110       | 1.2          | DMF     | 32                        | 30                        |

|                 |     |   |                      |    |       |
|-----------------|-----|---|----------------------|----|-------|
| 8               | 110 | 2 | DMF                  | 26 | 51    |
| 9               | 110 | 3 | DMF                  | 14 | 75    |
| 10              | 110 | 5 | DMF                  | <5 | 71    |
| 11              | 110 | 8 | DMF                  | -  | trace |
| 12              | 110 | 4 | DMSO                 | 7  | 86    |
| 13              | 110 | 4 | DMA                  | 21 | 74    |
| 14              | 110 | 4 | DMF/H <sub>2</sub> O | <5 | 88    |
| 15              | 110 | 4 | THF                  | -  | -     |
| 16              | 110 | 4 | DCE                  | -  | 45    |
| 17              | 110 | 4 | EtOH                 | -  | -     |
| 18              | 110 | 4 | MeCN                 | -  | -     |
| 19 <sup>b</sup> | 110 | 4 | DMF/H <sub>2</sub> O | 15 | 79    |
| 20 <sup>c</sup> | 110 | 4 | DMF/H <sub>2</sub> O | 29 | 64    |

**Supplementary Table 1. Screening the solvent and temperature for synthesis of 4.**

Reaction conditions: **1** (0.1 mmol), **2** (x mmol), Pd(OAc)<sub>2</sub> (5 mol%), Na<sub>2</sub>CO<sub>3</sub> (0.2 mmol), solvent (2 ml), H<sub>2</sub>O (40 μl), T °C, 12 h. <sup>a</sup>Yields of isolated products based on **1**. <sup>b</sup>Reaction performed in 2 mmol scale. <sup>c</sup>air atmosphere.

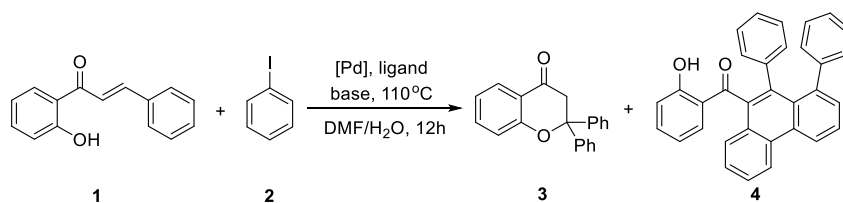

| Entry | Base (2eq)                      | [Pd] (5 mol%)                      | ligand    | 3 [%] <sup>a</sup> | 4 [%] <sup>a</sup> |
|-------|---------------------------------|------------------------------------|-----------|--------------------|--------------------|
| 1     | -                               | Pd(OAc) <sub>2</sub>               | -         | 21                 | 34                 |
| 2     | Li <sub>2</sub> CO <sub>3</sub> | Pd(OAc) <sub>2</sub>               | -         | 52                 | 35                 |
| 3     | K <sub>2</sub> CO <sub>3</sub>  | Pd(OAc) <sub>2</sub>               | -         | 18                 | 68                 |
| 4     | Cs <sub>2</sub> CO <sub>3</sub> | Pd(OAc) <sub>2</sub>               | -         | 10                 | 73                 |
| 5     | K <sub>3</sub> PO <sub>4</sub>  | Pd(OAc) <sub>2</sub>               | -         | 26                 | 45                 |
| 6     | NaOAc                           | Pd(OAc) <sub>2</sub>               | -         | 46                 | trace              |
| 7     | NaOH                            | Pd(OAc) <sub>2</sub>               | -         | 33                 | 48                 |
| 8     | t-BuOK                          | Pd(OAc) <sub>2</sub>               | -         | 23                 | 56                 |
| 9     | CsF                             | Pd(OAc) <sub>2</sub>               | -         | 55                 | trace              |
| 10    | Et <sub>3</sub> N               | Pd(OAc) <sub>2</sub>               | -         | 41                 | n.d.               |
| 11    | DBU                             | Pd(OAc) <sub>2</sub>               | -         | trace              | trace              |
| 12    | DABCO                           | Pd(OAc) <sub>2</sub>               | -         | 27                 | n.d.               |
| 13    | Na <sub>2</sub> CO <sub>3</sub> | Pd(TFA) <sub>2</sub>               | -         | 21                 | 66                 |
| 14    | Na <sub>2</sub> CO <sub>3</sub> | Pd(acac) <sub>2</sub>              | -         | trace              | 87                 |
| 15    | Na <sub>2</sub> CO <sub>3</sub> | K <sub>2</sub> PdCl <sub>6</sub>   | -         | trace              | 88                 |
| 16    | Na <sub>2</sub> CO <sub>3</sub> | PdCl <sub>2</sub>                  | -         | 15                 | 70                 |
| 17    | Na <sub>2</sub> CO <sub>3</sub> | Pd <sub>2</sub> (dba) <sub>3</sub> | -         | 24                 | 57                 |
| 18    | Na <sub>2</sub> CO <sub>3</sub> | Pd(OAc) <sub>2</sub>               | 1,10-Phen | n.d.               | n.d.               |



|    |                                 |                      |                       |       |       |
|----|---------------------------------|----------------------|-----------------------|-------|-------|
| 19 | Na <sub>2</sub> CO <sub>3</sub> | Pd(OAc) <sub>2</sub> | 2,2'-Biquinoline      | n.d.  | Trace |
| 20 | Na <sub>2</sub> CO <sub>3</sub> | Pd(OAc) <sub>2</sub> | PPh <sub>3</sub>      | trace | 54    |
| 21 | Na <sub>2</sub> CO <sub>3</sub> | Pd(OAc) <sub>2</sub> | P(o-tol) <sub>3</sub> | n.d.  | 20    |
| 22 | Na <sub>2</sub> CO <sub>3</sub> | Pd(OAc) <sub>2</sub> | dppp                  | n.d.  | 56    |
| 23 | Na <sub>2</sub> CO <sub>3</sub> | Pd(OAc) <sub>2</sub> | dppf                  | n.d.  | 16    |
| 24 | Na <sub>2</sub> CO <sub>3</sub> | Pd(OAc) <sub>2</sub> | DPEPhos               | trace | 85    |
| 25 | Na <sub>2</sub> CO <sub>3</sub> | Pd(OAc) <sub>2</sub> | t-BuXPhos             | trace | 83    |
| 26 | Na <sub>2</sub> CO <sub>3</sub> | Pd(OAc) <sub>2</sub> | XantPhos              | trace | 79    |

**Supplementary Table 2. Screening the bases and palladium sources for synthesis of 4.**

Reaction conditions: **1** (0.1 mmol), **2** (0.4 mmol), [Pd] (5 mol%), ligand (22 mol%), base (0.2 mmol), DMF (2 ml), H<sub>2</sub>O (40 μl), 110 °C, 12 h. <sup>a</sup>Yields of isolated products based on **1**.

**3.2 Optimization of the Reaction Conditions for synthesis of 69**

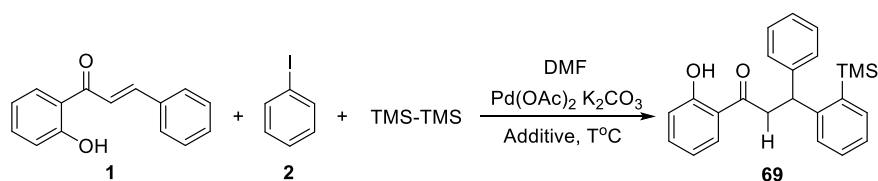

| Entry | K <sub>2</sub> CO <sub>3</sub> (x eq) | Temp. (°C) | Additives (1 eq)     | <b>69</b> [%] <sup>a</sup> | <b>1</b> [%] <sup>a</sup> |
|-------|---------------------------------------|------------|----------------------|----------------------------|---------------------------|
| 1     | -                                     | 110        | -                    | 16                         | 75                        |
| 2     | 0.5                                   | 110        | -                    | 38                         | 51                        |
| 3     | 1                                     | 110        | -                    | 58                         | 23                        |
| 4     | 1.5                                   | 110        | -                    | 78                         | 16                        |
| 5     | 2                                     | 110        | -                    | 77                         | 15                        |
| 6     | 3                                     | 110        | -                    | 75                         | 18                        |
| 7     | 4                                     | 110        | -                    | 73                         | 16                        |
| 8     | 1.5                                   | r.t.       | -                    | 47                         | 42                        |
| 9     | 1.5                                   | 50         | -                    | 61                         | 35                        |
| 10    | 1.5                                   | 70         | -                    | 81                         | 15                        |
| 11    | 1.5                                   | 90         | -                    | 80                         | 14                        |
| 12    | 1.5                                   | 130        | -                    | 75                         | 16                        |
| 13    | 1.5                                   | 70         | Bu <sub>4</sub> NBr  | 82                         | 13                        |
| 14    | 1.5                                   | 70         | Bu <sub>4</sub> NOAc | 83                         | 14                        |
| 15    | 1.5                                   | 70         | Me <sub>4</sub> NOAc | 92                         | -                         |

**Supplementary Table 3. Optimization of the Reaction Conditions for synthesis of 69.**

Reaction conditions: **1** (0.1 mmol), **2** (0.15 mmol), hexamethyldisilane (0.2 mmol), additives (0.1 mmol), Pd(OAc)<sub>2</sub> (5 mol%), K<sub>2</sub>CO<sub>3</sub> (x mmol), DMF (2 mL), T °C, 12 h. <sup>a</sup>Products were obtained in isolated yields based on **1**.

### 3.3 Optimization of the Reaction Conditions for synthesis of **103**

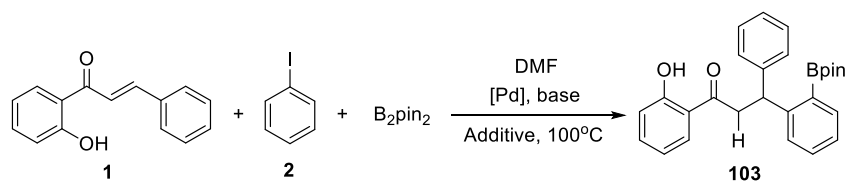

| Entry | base (2 eq)                     | [Pd]                                | Additives (1 eq)     | Equiv. of $B_2pin_2$ | <b>103</b> [%] <sup>a</sup> |
|-------|---------------------------------|-------------------------------------|----------------------|----------------------|-----------------------------|
| 1     | LiCO <sub>3</sub>               | Pd(OAc) <sub>2</sub>                | -                    | 2                    | Complex                     |
| 2     | Na <sub>2</sub> CO <sub>3</sub> | Pd(OAc) <sub>2</sub>                | -                    | 2                    | 41                          |
| 3     | K <sub>2</sub> CO <sub>3</sub>  | Pd(OAc) <sub>2</sub>                | -                    | 2                    | 77                          |
| 4     | CsCO <sub>3</sub>               | Pd(OAc) <sub>2</sub>                | -                    | 2                    | 59                          |
| 5     | K <sub>3</sub> PO <sub>4</sub>  | Pd(OAc) <sub>2</sub>                | -                    | 2                    | 52                          |
| 6     | KOAc                            | Pd(OAc) <sub>2</sub>                | -                    | 2                    | 75                          |
| 7     | tBuOK                           | Pd(OAc) <sub>2</sub>                | -                    | 2                    | 70                          |
| 8     | PivOK                           | Pd(OAc) <sub>2</sub>                | -                    | 2                    | 84                          |
| 9     | DABCO                           | Pd(OAc) <sub>2</sub>                | -                    | 2                    | -                           |
| 10    | Et <sub>3</sub> N               | Pd(OAc) <sub>2</sub>                | -                    | 2                    | -                           |
| 11    | PivOK                           | Pd(PPh <sub>3</sub> ) <sub>4</sub>  | -                    | 2                    | -                           |
| 12    | PivOK                           | Pd <sub>2</sub> (dba) <sub>3</sub>  | -                    | 2                    | 49                          |
| 13    | PivOK                           | Pd(tBu <sub>3</sub> P) <sub>2</sub> | -                    | 2                    | -                           |
| 14    | PivOK                           | PdCl <sub>2</sub>                   | -                    | 2                    | -                           |
| 15    | PivOK                           | Pd(OAc) <sub>2</sub>                | Bu <sub>4</sub> NBr  | 2                    | 78                          |
| 16    | PivOK                           | Pd(OAc) <sub>2</sub>                | Bu <sub>4</sub> NF   | 2                    | 42                          |
| 17    | PivOK                           | Pd(OAc) <sub>2</sub>                | Bu <sub>4</sub> NI   | 2                    | 38                          |
| 18    | PivOK                           | Pd(OAc) <sub>2</sub>                | Bu <sub>4</sub> NOAc | 2                    | 75                          |
| 19    | PivOK                           | Pd(OAc) <sub>2</sub>                | Me <sub>4</sub> NOAc | 2                    | 76                          |
| 20    | PivOK                           | Pd(OAc) <sub>2</sub>                | -                    | 1                    | 52                          |
| 21    | PivOK                           | Pd(OAc) <sub>2</sub>                | -                    | 1.5                  | 64                          |
| 22    | PivOK                           | Pd(OAc) <sub>2</sub>                | -                    | 2.5                  | 84                          |
| 23    | PivOK                           | Pd(OAc) <sub>2</sub>                | -                    | 3                    | 82                          |
| 24    | PivOK                           | Pd(OAc) <sub>2</sub>                | -                    | 4                    | 73                          |
| 25    | PivOK                           | Pd(OAc) <sub>2</sub>                | -                    | 5                    | 54                          |

**Supplementary Table 4. Optimization of the Reaction Conditions for synthesis of **103**.**

Reaction conditions: **1** (0.1 mmol), **2** (0.15 mmol), bis(pinacolato)diboron (x mmol), [Pd] (5 mol%), base (0.2 mmol), additives (0.1 mmol), DMF (2 ml), 100 °C, 12 h. <sup>a</sup>Yields of isolated products based on **1**.

## 4. Supplementary Figures

### 4.1 Monitoring of hydrogen gas

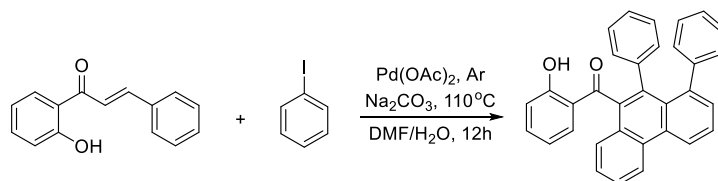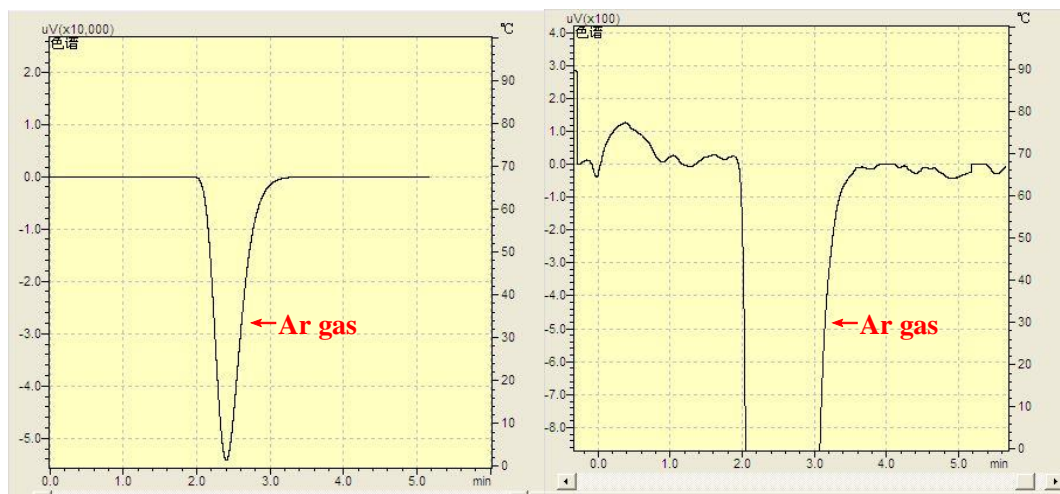

**Supplementary Figure 1. Further control experiments. Monitoring of hydrogen gas in the formation of 4.**

### 4.2 Detection for the generation of PhH from 142 to 4.

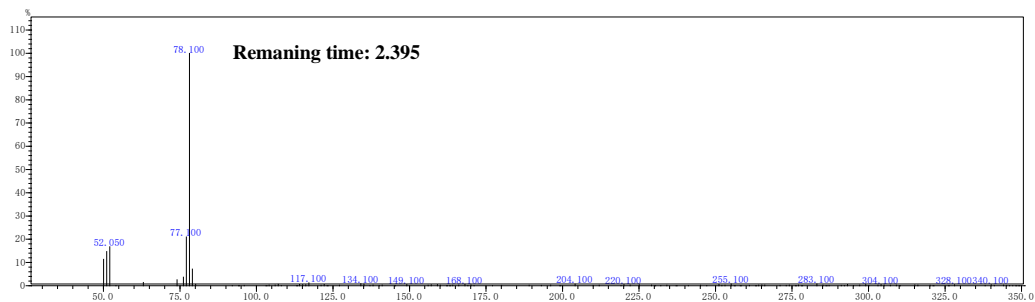

**Supplementary Figure 2. Further control experiments. Detection for the generation of PhH from 142 to 4.**

Note: The detection of benzene that possibly to be a reduction product of PhI. Nevertheless, the amount of benzene that detected by GC-MS is less than the amount of corresponding oxidation product, the possibility for other alternative oxidative pathways cannot be excluded.

### 4.3 Isotopic labeling experiments

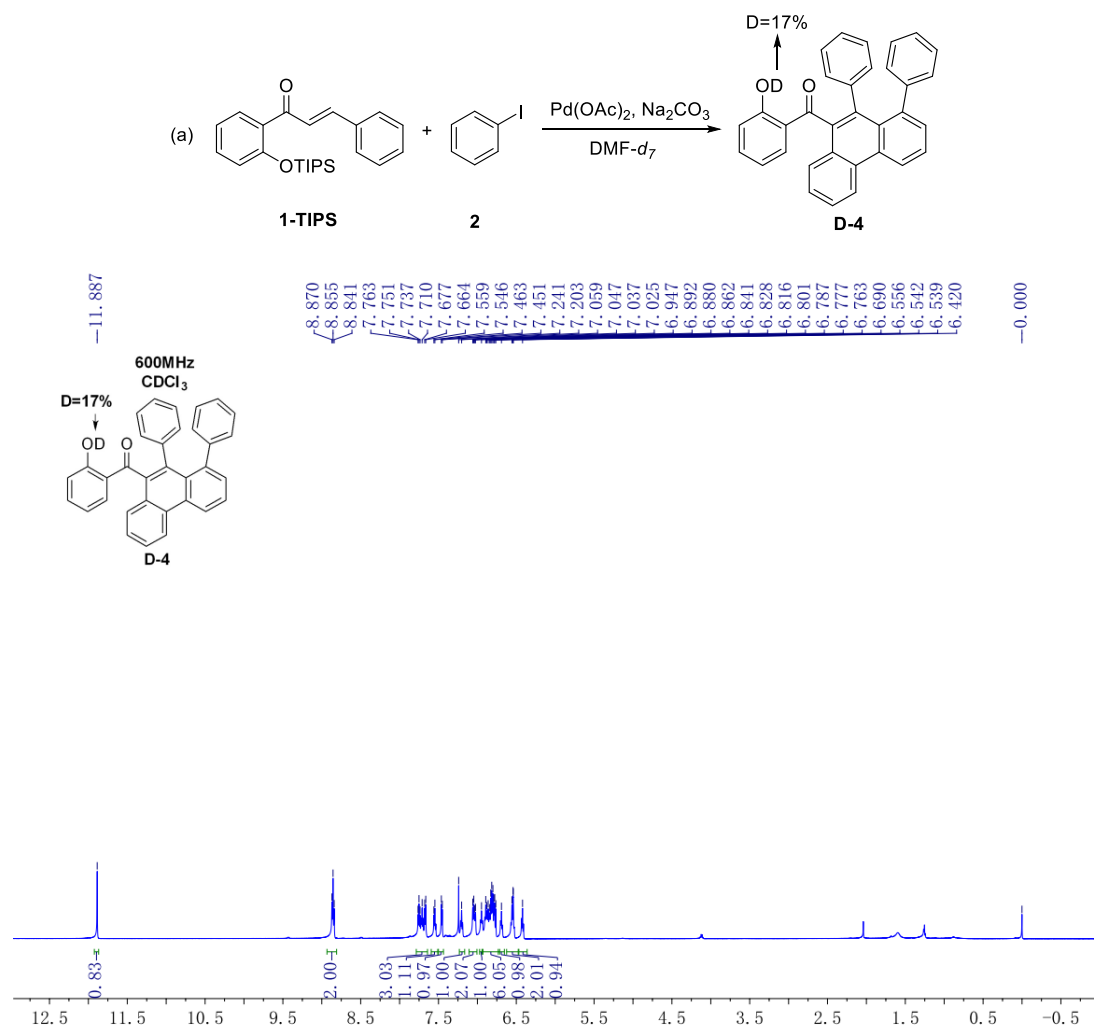

**Supplementary Figure 3. Isotopic labeling experiments.** Investigation on the source of hydrogen at hydroxyl group using  $\text{DMF-}d_7$ .

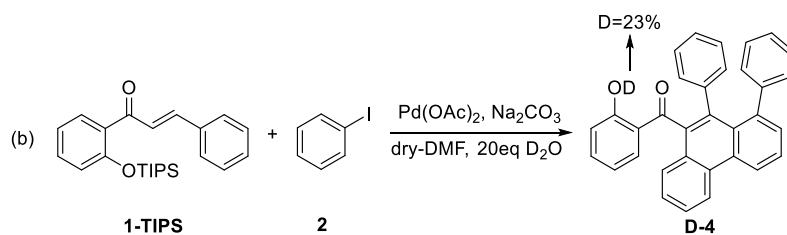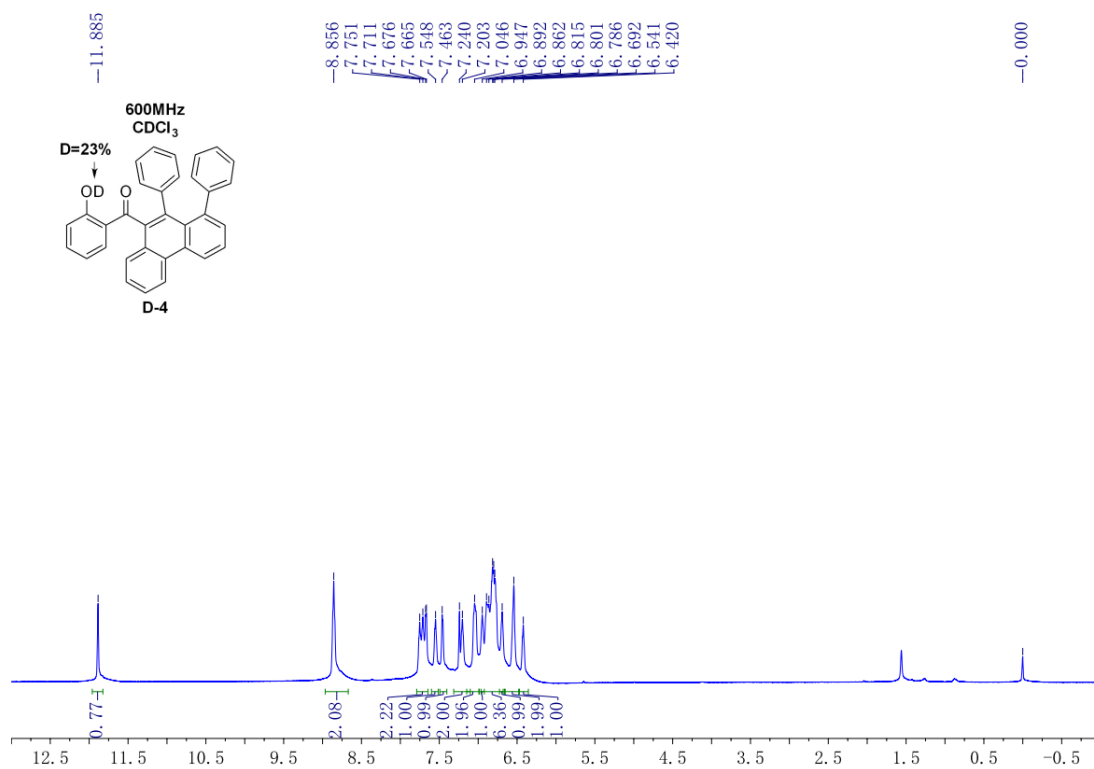

**Supplementary Figure 4. Isotopic labeling experiments.** Investigation on the source of hydrogen at hydroxyl group using D<sub>2</sub>O.

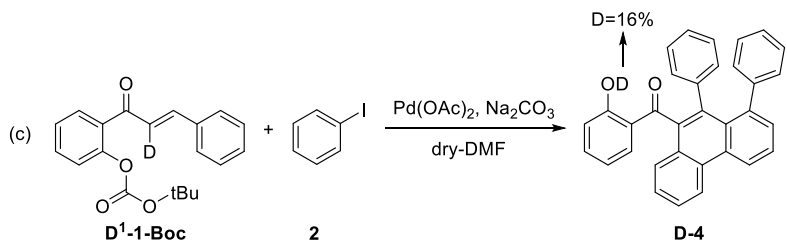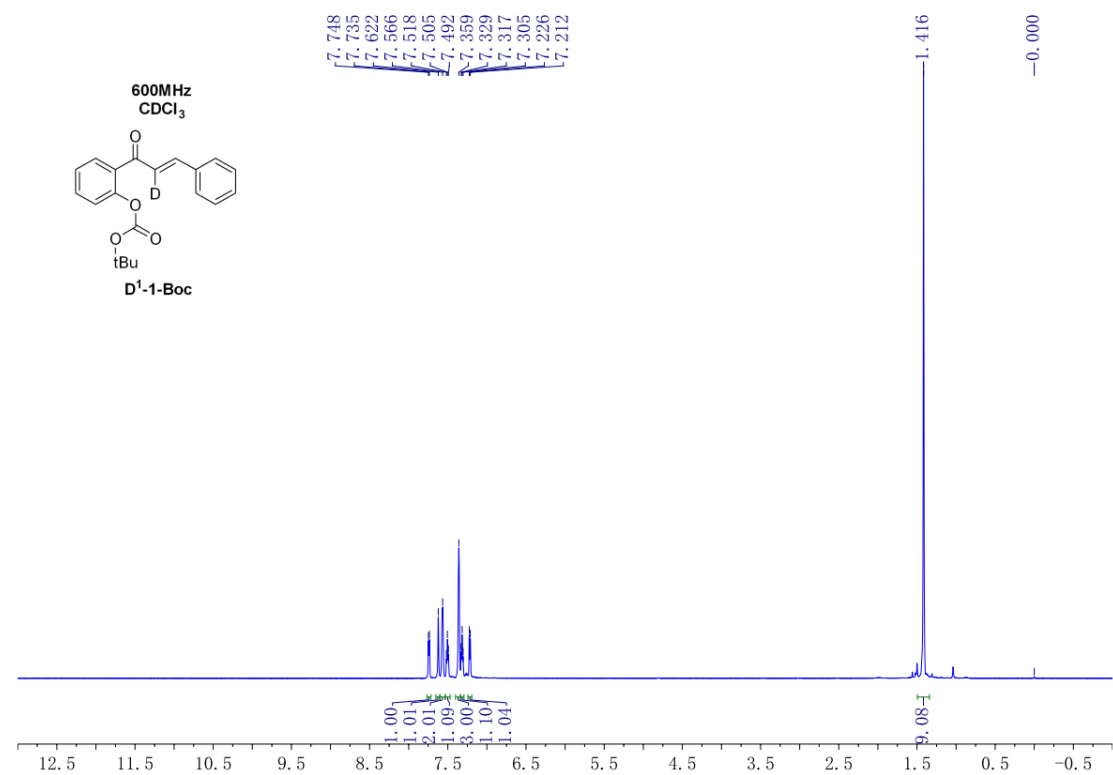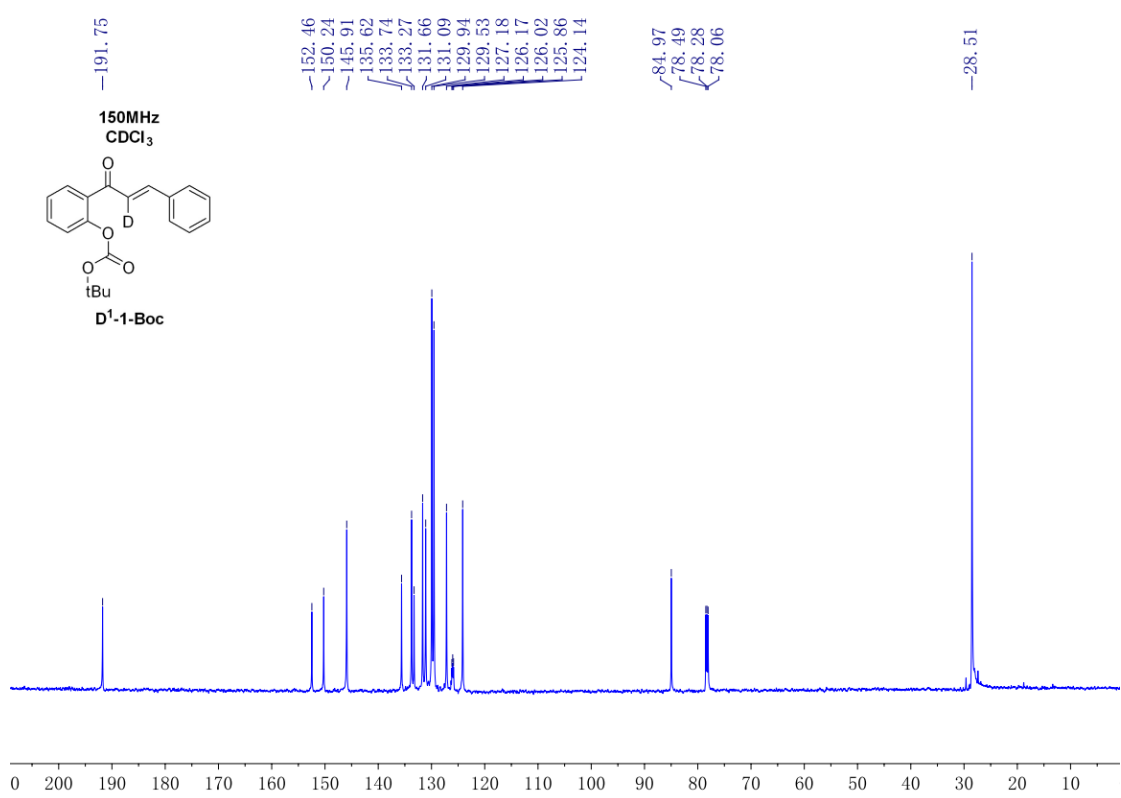

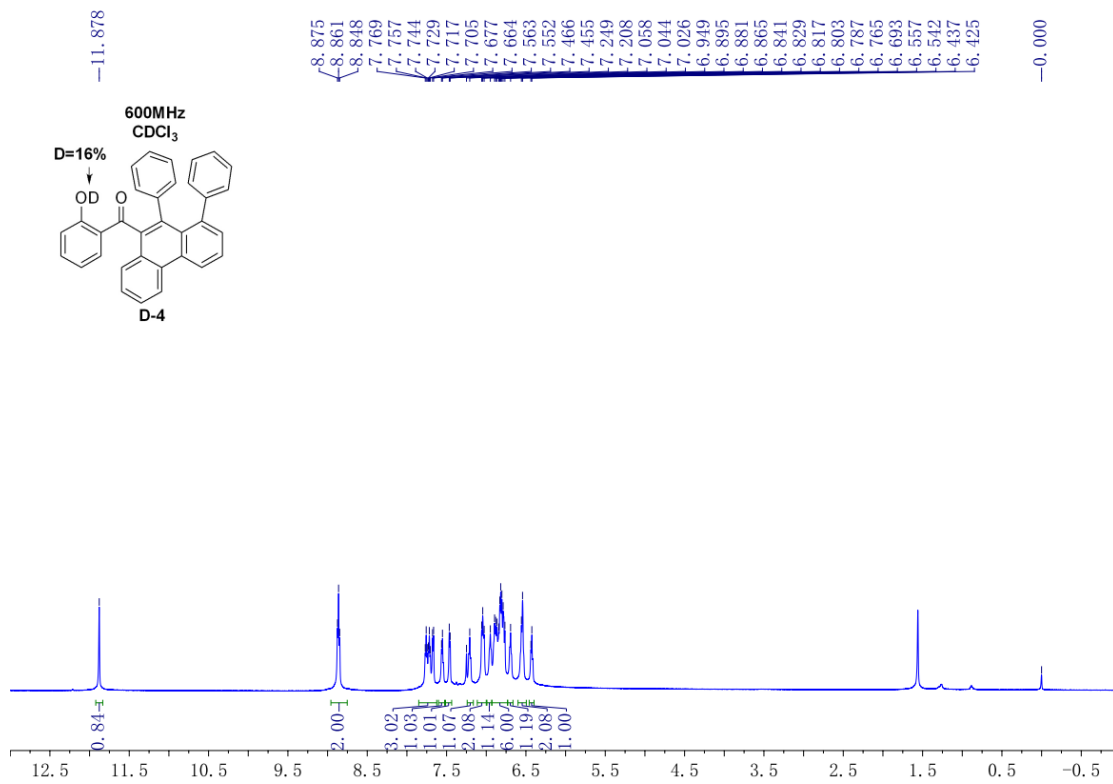

**Supplementary Figure 5. Isotopic labeling experiments.** Investigation on the source of hydrogen at hydroxyl group using [ $\alpha$ -D]-2'-OBoc-Chalcone.

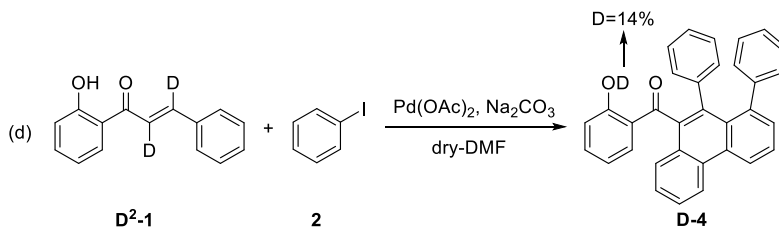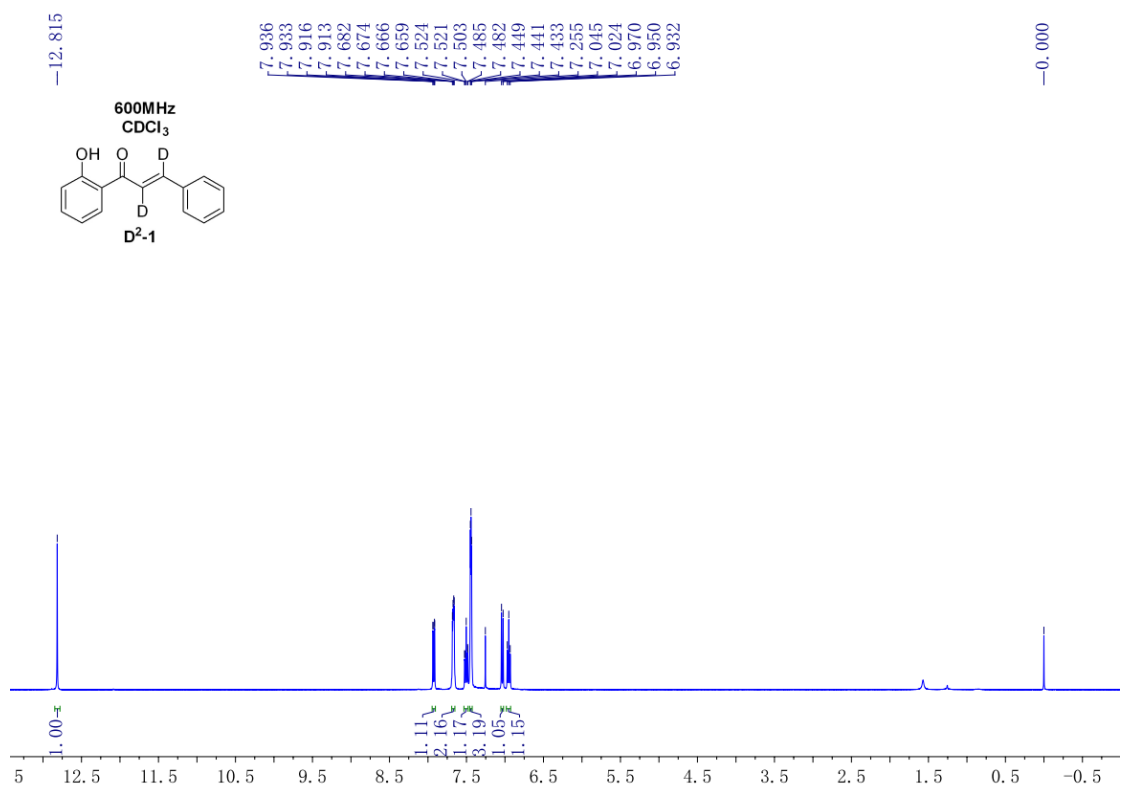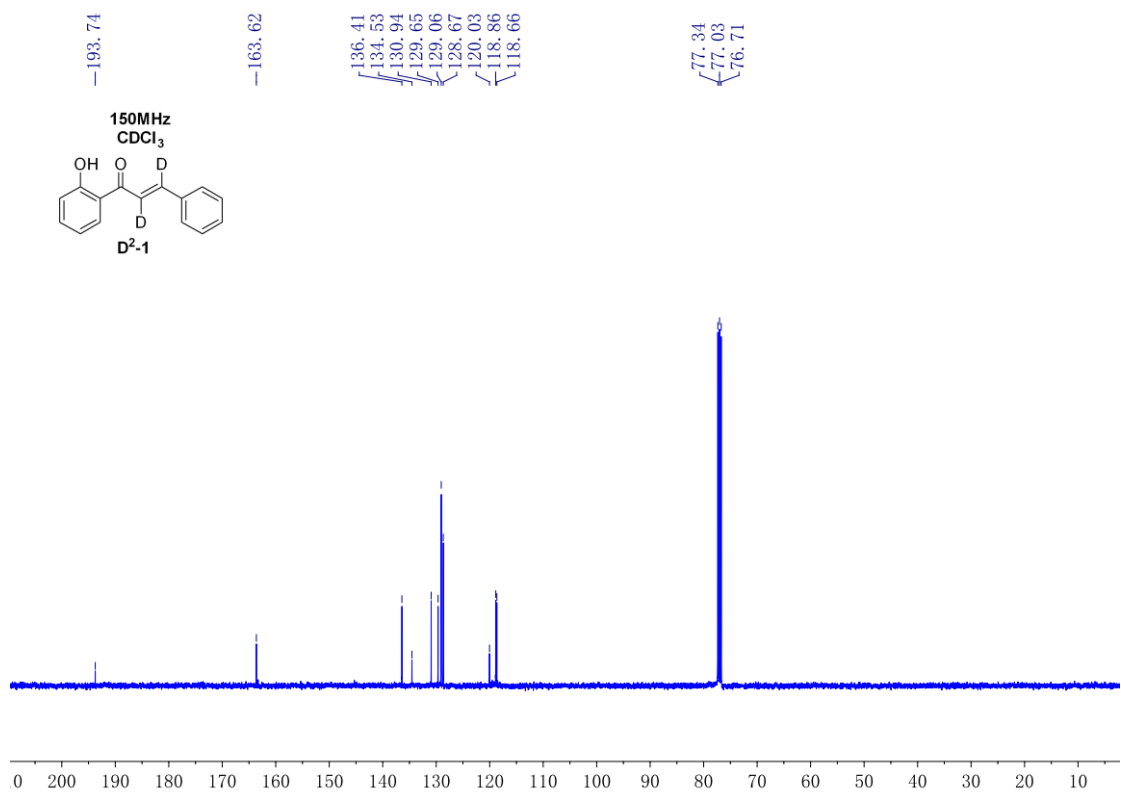



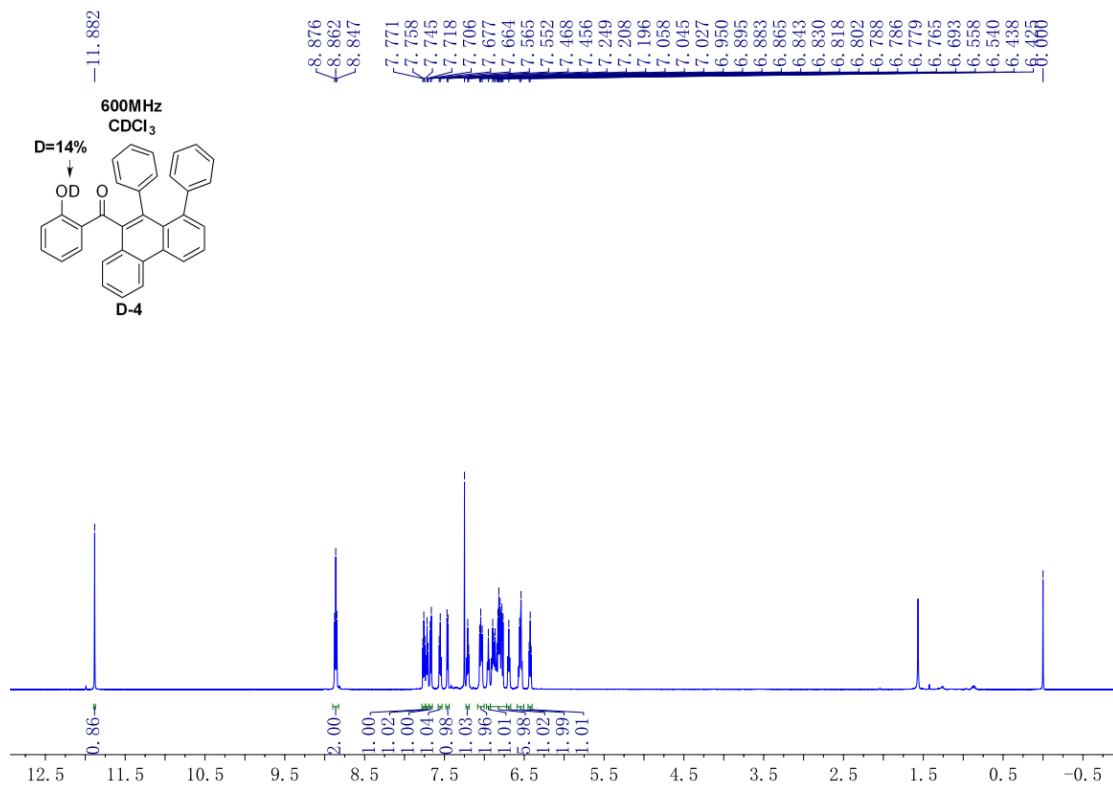

**Supplementary Figure 6. Isotopic labeling experiments.** Investigation on the source of hydrogen at hydroxyl group using  $[\alpha\text{-}\beta\text{-D}_2]\text{-2'}$ -OH-Chalcone.

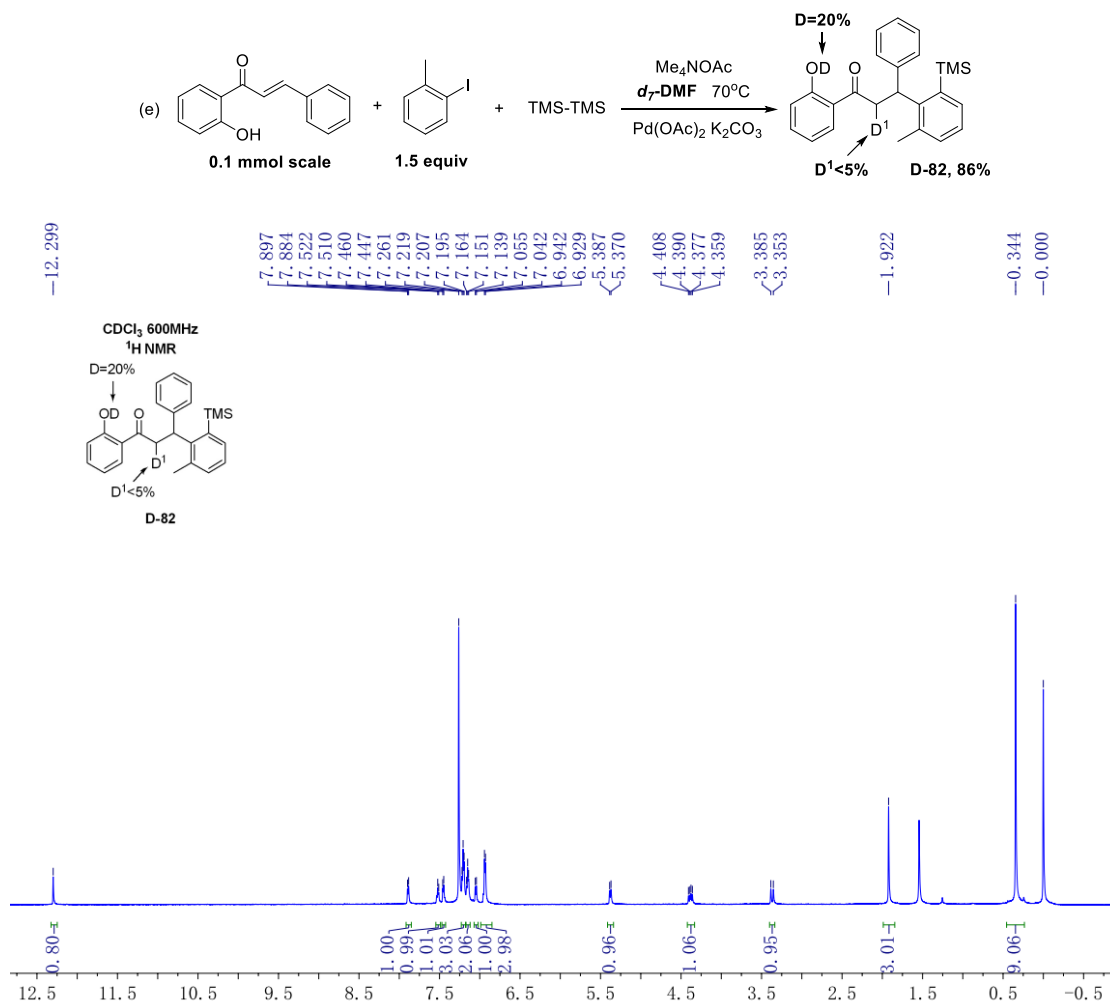

**Supplementary Figure 7. Isotopic labeling experiments.** Investigation on the source of D and D<sup>1</sup> using DMF-*d*<sub>7</sub>.

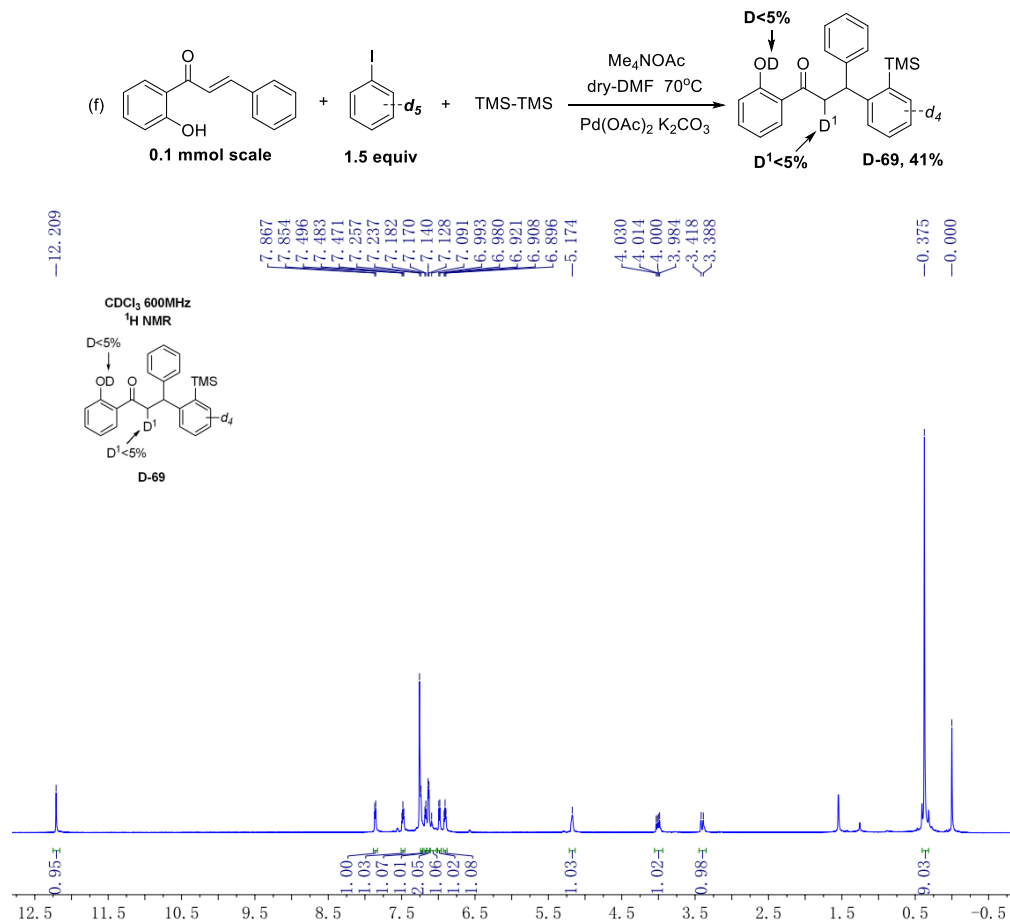

**Supplementary Figure 8. Isotopic labeling experiments.** Investigation on the source of D and D<sup>1</sup> using PhI-*d*<sub>5</sub>.

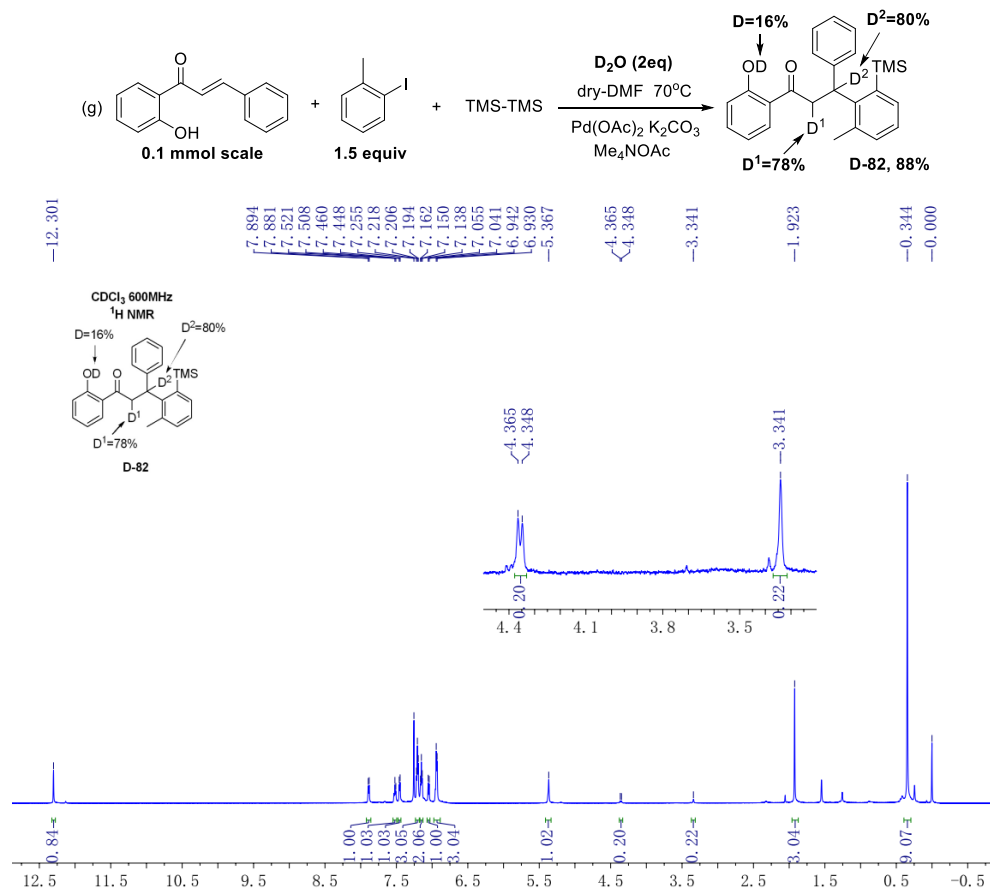

**Supplementary Figure 9. Isotopic labeling experiments.** Investigation on the source of D and D<sup>1</sup> using D<sub>2</sub>O.

#### 4.4 Necessity of hydroxyl group for silylation and borylation

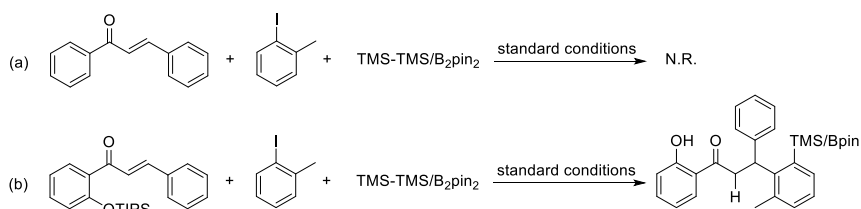

**Supplementary Figure 10. Further control experiments.** Necessity of hydroxyl group for silylation and borylation.



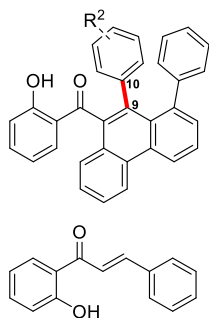

### 2'-Hydroxychalcone (1):

yellow solid; TLC (PET:EtOAc, 100:1 v/v):  $R_f = 0.3$ ;  $^1\text{H NMR}$  (600 MHz,  $\text{CDCl}_3$ )  $\delta=12.89$  (s, 1H), 7.91–7.73 (m, 2H), 7.63–7.46 (m, 3H), 7.41 (t,  $J = 7.8$  Hz, 1H), 7.35 (s, 3H), 6.98 (d,  $J = 8.4$  Hz, 1H), 6.87 (t,  $J = 7.8$  Hz, 1H).  $^{13}\text{C NMR}$  (150 MHz,  $\text{CDCl}_3$ )  $\delta=194.7$ , 164.7, 146.5, 137.4, 135.5, 132.0, 130.8, 130.1, 129.7, 121.0, 121.1, 119.9, 119.6.

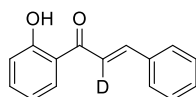

### [ $\alpha$ -D]-2'-Hydroxychalcone ( $\text{D}^1$ -1):

yellow solid; TLC (PET:EtOAc, 100:1 v/v):  $R_f = 0.3$ ;  $^1\text{H NMR}$  (600 MHz,  $\text{CDCl}_3$ )  $\delta=12.85$  (s, 1H), 7.89 (d,  $J = 6.0$  Hz, 2H), 7.63 (s, 2H), 7.51–7.45 (m, 1H), 7.41 (s, 3H), 7.01 (d,  $J = 8.4$  Hz, 1H), 6.93 (d,  $J = 7.2$  Hz, 1H).  $^{13}\text{C NMR}$  (150 MHz,  $\text{CDCl}_3$ )  $\delta=194.7$ , 164.6, 146.4, 137.4, 135.6, 132.0, 130.7, 130.1, 129.7, 121.0, 119.9, 119.6.

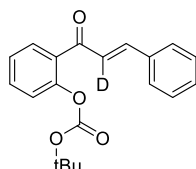

### [ $\alpha$ -D]-2'-OBoc-chalcone ( $\text{D}^1$ -1-Boc):

yellow solid; TLC (PET:EtOAc, 50:1 v/v):  $R_f = 0.3$ ;  $^1\text{H NMR}$  (600 MHz,  $\text{CDCl}_3$ )  $\delta=7.74$  (d,  $J = 7.8$  Hz, 1H), 7.62 (s, 1H), 7.57 (s, 2H), 7.51 (t,  $J = 7.8$  Hz, 1H), 7.36 (s, 3H), 7.32 (t,  $J = 7.2$  Hz, 1H), 7.22 (d,  $J = 7.8$  Hz, 1H), 1.42 (s, 9H).  $^{13}\text{C NMR}$  (150 MHz,  $\text{CDCl}_3$ )  $\delta=191.8$ , 152.5, 150.2, 145.9, 135.6, 133.7, 133.3, 131.7, 131.1, 129.9, 129.5, 127.2, 126.2, 126.0, 125.9, 124.1, 85.0, 28.5. HRMS (ESI)  $m/z$  calcd for  $\text{C}_{20}\text{H}_{19}\text{DO}_4\text{Na}^+$  ( $\text{M}+\text{Na}$ ) $^+$  348.13166, found 348.13146.

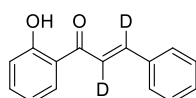

### [ $\alpha$ -D- $\beta$ -D]-2'-Hydroxychalcone ( $\text{D}^2$ -1):

yellow solid; TLC (PET:EtOAc, 100:1 v/v):  $R_f = 0.3$ ;  $^1\text{H NMR}$  (400 MHz,  $\text{CDCl}_3$ )  $\delta=12.81$  (s, 1H), 7.92 (dd,  $J = 8.0, 1.2$  Hz, 1H), 7.67 (dd,  $J = 6.4, 2.8$  Hz, 2H), 7.53–7.48 (m, 1H), 7.46–7.43 (m, 3H), 7.03 (d,  $J = 8.4$  Hz, 1H), 6.95 (t,  $J = 7.6$  Hz,

1H).  $^{13}\text{C}$  NMR (100 MHz,  $\text{CDCl}_3$ )  $\delta$ =193.7, 163.6, 136.4, 134.5, 130.9, 129.7, 129.1, 128.7, 120.0, 118.9, 118.7. HRMS (ESI)  $m/z$  calcd for  $\text{C}_{15}\text{H}_{11}\text{D}_2\text{O}_2^+$  ( $\text{M}+\text{H}$ ) $^+$  227.10356, found 227.10363.

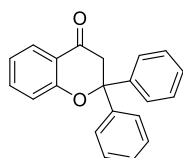

**2,2-diphenylchroman-4-one (3):**

Yield 56%; 16.8 mg; white solid; mp 137–140°C; TLC (PET:EtOAc, 50:1 v/v):  $R_f$  = 0.3;  $^1\text{H}$  NMR (600 MHz,  $\text{CDCl}_3$ )  $\delta$ =7.74 (d,  $J$  = 7.8 Hz, 1H), 7.40 (t,  $J$  = 8.4 Hz, 4H), 7.39–7.35 (m, 1H), 7.24 (t,  $J$  = 7.8 Hz, 4H), 7.17 (t,  $J$  = 7.2 Hz, 2H), 7.09 (d,  $J$  = 8.4 Hz, 1H), 6.84 (t,  $J$  = 7.2 Hz, 1H), 3.48 (s, 2H).  $^{13}\text{C}$  NMR (150 MHz,  $\text{CDCl}_3$ )  $\delta$ =191.1, 159.6, 142.7, 136.1, 128.4, 127.8, 126.5, 126.2, 121.3, 121.3, 118.5, 85.8, 48.5. HRMS (ESI)  $m/z$  calcd for  $\text{C}_{21}\text{H}_{17}\text{O}_2^+$  ( $\text{M}+\text{H}$ ) $^+$  301.12231, found 301.12237.

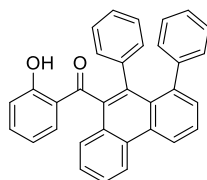

**(1,10-diphenylphenanthren-9-yl)(2-hydroxyphenyl)methanone (4):**

Yield 88%; 39.7 mg; white solid; mp 236–239°C; TLC (PET:EtOAc, 100:1 v/v):  $R_f$  = 0.3;  $^1\text{H}$  NMR (600 MHz,  $\text{CDCl}_3$ )  $\delta$ =12.00 (s, 1H), 8.90 (t,  $J$  = 9.0 Hz, 2H), 7.84–7.72 (m, 3H), 7.59 (t,  $J$  = 7.2 Hz, 1H), 7.51 (d,  $J$  = 7.2 Hz, 1H), 7.25 (t,  $J$  = 7.2 Hz, 1H), 7.12 (dd,  $J$  = 22.2, 7.8 Hz, 2H), 7.04–7.00 (m, 1H), 6.99–6.81 (m, 6H), 6.76 (d,  $J$  = 6.6 Hz, 1H), 6.68–6.56 (m, 2H), 6.47 (d,  $J$  = 7.8 Hz, 1H).  $^{13}\text{C}$  NMR (150 MHz,  $\text{CDCl}_3$ )  $\delta$ =205.2, 162.1, 143.3, 142.8, 139.0, 136.4, 136.3, 135.9, 133.0, 132.4, 132.0, 130.9, 130.7, 129.8, 129.1, 129.0, 128.8, 128.2, 127.4, 126.9, 126.8, 126.7, 126.5, 125.8, 123.3, 122.0, 120.5, 118.5, 117.6. HRMS (ESI)  $m/z$  calcd for  $\text{C}_{33}\text{H}_{23}\text{O}_2^+$  ( $\text{M}+\text{H}$ ) $^+$  451.16926, found 451.16943.

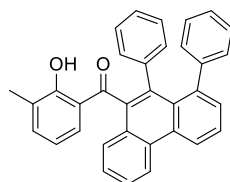

**(1,10-diphenylphenanthren-9-yl)(2-hydroxy-3-methylphenyl)methanone (5):**

Yield 84%; 39.2 mg; yellow solid; mp 214–218°C; TLC (PET:EtOAc, 100:1 v/v):  $R_f$  = 0.3;  $^1\text{H}$  NMR (600 MHz,  $\text{CDCl}_3$ )  $\delta$ =12.21 (s, 1H), 8.85 (t,  $J$  = 9.6 Hz, 2H), 7.75 (t,  $J$  = 7.8 Hz, 1H), 7.70 (t,  $J$  = 7.8 Hz, 1H), 7.65 (d,  $J$  = 8.4 Hz, 1H), 7.53 (t,  $J$  = 7.8 Hz, 1H), 7.45 (d,  $J$  = 7.2 Hz, 1H), 7.10–7.00 (m, 3H), 6.95 (t,  $J$  = 7.2 Hz, 1H), 6.86 (ddd,  $J$  = 21.0, 13.8, 6.0 Hz, 4H), 6.69 (dd,  $J$  = 19.2, 7.2 Hz, 2H), 6.56

(d,  $J = 6.0$  Hz, 2H), 6.34 (t,  $J = 7.8$  Hz, 1H), 2.14 (s, 3H).  $^{13}\text{C}$  NMR (150 MHz,  $\text{CDCl}_3$ )  $\delta = 205.3, 160.6, 143.3, 142.7, 139.0, 137.1, 136.2, 135.6, 132.3, 131.9, 130.7, 130.7, 130.6, 129.7, 129.0, 128.8, 128.3, 127.4, 127.3, 126.9, 126.7, 126.5, 126.3, 126.0, 125.7, 123.3, 122.0, 119.8, 117.8, 15.2$ . HRMS (ESI)  $m/z$  calcd for  $\text{C}_{34}\text{H}_{24}\text{O}_2\text{Na}^+$  ( $\text{M}+\text{Na}$ ) $^+$  487.16685, found 487.16692.

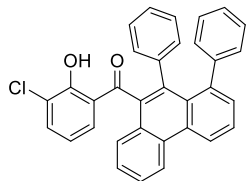

**(3-chloro-2-hydroxyphenyl)(1,10-diphenylphenanthren-9-yl)methanone (6):**

Yield 88%; 42.6 mg; white solid; mp 206–209°C; TLC (PET:EtOAc, 100:1 v/v):  $R_f = 0.3$ ;  $^1\text{H}$  NMR (600 MHz,  $\text{CDCl}_3$ )  $\delta = 12.57$  (d,  $J = 2.4$  Hz, 1H), 8.89 (t,  $J = 7.8$  Hz, 2H), 7.77 (dt,  $J = 25.8, 7.8$  Hz, 2H), 7.69 (d,  $J = 7.8$  Hz, 1H), 7.59 (t,  $J = 7.2$  Hz, 1H), 7.52 (d,  $J = 6.6$  Hz, 1H), 7.32 (d,  $J = 7.8$  Hz, 1H), 7.11 (dd,  $J = 12.6, 7.8$  Hz, 2H), 7.02 (t,  $J = 7.2$  Hz, 1H), 6.95 (t,  $J = 7.2$  Hz, 1H), 6.93–6.87 (m, 2H), 6.84 (d,  $J = 7.2$  Hz, 1H), 6.76 (dd,  $J = 5.4, 2.4$  Hz, 2H), 6.66–6.57 (m, 2H), 6.40 (t,  $J = 7.8$  Hz, 1H).  $^{13}\text{C}$  NMR (150 MHz,  $\text{CDCl}_3$ )  $\delta = 204.8, 157.4, 142.8, 142.5, 138.5, 135.9, 135.7, 135.1, 132.1, 131.7, 131.2, 130.6, 130.3, 129.4, 128.6, 128.3, 127.7, 127.3, 127.2, 126.8, 126.6, 126.4, 125.6, 125.4, 123.1, 121.7, 121.5, 121.0, 118.3$ . HRMS (ESI)  $m/z$  calcd for  $\text{C}_{33}\text{H}_{22}\text{ClO}_2^+$  ( $\text{M}+\text{H}$ ) $^+$  485.13028, found 485.13019.

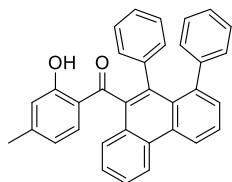

**(1,10-diphenylphenanthren-9-yl)(2-hydroxy-4-methylphenyl)methanone (7):**

Yield 87%; 40.4 mg; yellow solid; mp 192–195°C; TLC (PET:EtOAc, 100:1 v/v):  $R_f = 0.3$ ;  $^1\text{H}$  NMR (600 MHz,  $\text{CDCl}_3$ )  $\delta = 12.19$  (s, 1H), 8.97–8.84 (m, 2H), 7.77 (ddd,  $J = 25.2, 18.6, 7.8$  Hz, 3H), 7.59 (t,  $J = 7.2$  Hz, 1H), 7.54 (d,  $J = 7.2$  Hz, 1H), 7.23 (d,  $J = 7.2$  Hz, 1H), 7.15 (d,  $J = 7.2$  Hz, 1H), 7.06 (t,  $J = 7.2$  Hz, 1H), 7.03–6.89 (m, 4H), 6.81 (d,  $J = 7.8$  Hz, 2H), 6.71 (d,  $J = 19.2$  Hz, 3H), 6.30 (d,  $J = 7.8$  Hz, 1H), 2.21 (s, 3H).  $^{13}\text{C}$  NMR (150 MHz,  $\text{CDCl}_3$ )  $\delta = 204.2, 162.2, 147.9, 143.2, 142.6, 138.9, 136.0, 135.5, 132.8, 132.2, 131.8, 130.6, 130.4, 129.6, 128.8, 128.2, 127.4, 127.2, 126.8, 126.7, 126.5, 126.3, 125.8, 125.6, 123.2, 121.8, 119.7, 118.4, 117.6, 21.8$ . HRMS (ESI)  $m/z$  calcd for  $\text{C}_{34}\text{H}_{25}\text{O}_2^+$  ( $\text{M}+\text{H}$ ) $^+$  465.18491, found 465.18536.

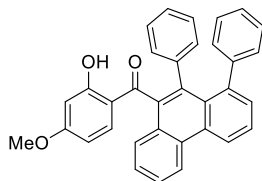

**(1,10-diphenylphenanthren-9-yl)(2-hydroxy-4-methoxyphenyl)methanone (8):**

Yield 80%; 38.4 mg; yellow solid; mp 177–180°C; TLC (PET:EtOAc, 50:1 v/v):  $R_f = 0.3$ ;  $^1\text{H}$  NMR (600 MHz,  $\text{CDCl}_3$ )  $\delta = 12.48$  (s, 1H), 8.86–8.72 (m, 2H), 7.66



(ddd,  $J = 31.2, 16.2, 7.8$  Hz, 3H), 7.49 (t,  $J = 7.2$  Hz, 1H), 7.41 (d,  $J = 6.6$  Hz, 1H), 7.09 (d,  $J = 7.2$  Hz, 1H), 7.01 (s, 1H), 6.93 (s, 1H), 6.89–6.75 (m, 4H), 6.72–6.63 (m, 2H), 6.57 (dd,  $J = 16.2, 6.6$  Hz, 2H), 6.21 (s, 1H), 5.93 (d,  $J = 9.0$  Hz, 1H), 3.59 (s, 3H).  $^{13}\text{C}$  NMR (150 MHz,  $\text{CDCl}_3$ )  $\delta = 202.7, 165.9, 165.1, 143.2, 142.7, 139.1, 136.0, 135.5, 134.6, 132.2, 131.8, 130.7, 130.5, 129.7, 129.2, 128.9, 128.3, 127.7, 127.4, 127.2, 126.8, 126.4, 125.9, 125.6, 123.2, 121.8, 114.8, 107.3, 100.0, 55.2$ . HRMS (ESI)  $m/z$  calcd for  $\text{C}_{34}\text{H}_{25}\text{O}_3 + (\text{M} + \text{H})^+$  481.17982, found 481.18077.

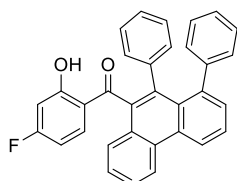

**(1,10-diphenylphenanthren-9-yl)(4-fluoro-2-hydroxyphenyl)methanone (9):**

Yield 86%; 40.3 mg; yellow solid; mp 195–199°C; TLC (PET:EtOAc, 100:1 v/v):  $R_f = 0.3$ ;  $^1\text{H}$  NMR (600 MHz,  $\text{CDCl}_3$ )  $\delta = 12.33$  (s, 1H), 9.02–8.84 (m, 2H), 7.78 (ddd,  $J = 20.4, 13.2, 7.8$  Hz, 3H), 7.67–7.59 (m, 1H), 7.53 (d,  $J = 6.6$  Hz, 1H), 7.13 (dd,  $J = 17.4, 6.6$  Hz, 2H), 7.03 (d,  $J = 7.2$  Hz, 1H), 6.94 (dt,  $J = 13.8, 6.6$  Hz, 3H), 6.82 (ddd,  $J = 26.4, 13.2, 7.2$  Hz, 3H), 6.67 (t,  $J = 7.2$  Hz, 1H), 6.60 (d,  $J = 7.2$  Hz, 1H), 6.52 (d,  $J = 10.2$  Hz, 1H), 6.17 (t,  $J = 7.2$  Hz, 1H). (m, 4H), 7.60 (t,  $J = 7.4$  Hz, 2H), 7.55 (d,  $J = 8.6$  Hz, 2H), 2.16–2.10 (m, 2H), 1.84 (s, 3H), 1.15 (dt,  $J = 20.5, 7.2$  Hz, 4H), 1.06 (dd,  $J = 14.7, 7.7$  Hz, 2H), 0.96–0.91 (m, 2H), 0.79 (t,  $J = 7.2$  Hz, 3H);  $^{13}\text{C}$  NMR (150 MHz,  $\text{CDCl}_3$ )  $\delta = 204.0, 168.0, 166.3, 164.7, 164.6, 143.2, 142.9, 139.0, 135.9, 135.7, 135.5, 135.4, 132.5, 132.1, 132.0, 131.0, 130.6, 129.8, 129.0, 128.7, 128.1, 127.7, 127.5, 127.0, 126.9, 126.8, 126.7, 126.6, 125.9, 125.8, 123.4, 122.0, 117.7, 106.9, 106.8, 104.4, 104.2$ .  $^{19}\text{F}$  NMR (375 MHz,  $\text{CDCl}_3$ )  $\delta = 98.56$ . HRMS (ESI)  $m/z$  calcd for  $\text{C}_{33}\text{H}_{22}\text{FO}_2 + (\text{M} + \text{H})^+$  469.15984, found 469.15990.

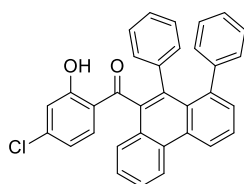

**(4-chloro-2-hydroxyphenyl)(1,10-diphenylphenanthren-9-yl)methanone (10):**

Yield 85%; 41.2 mg; white solid; mp 226–229°C; TLC (PET:EtOAc, 100:1 v/v):  $R_f = 0.3$ ;  $^1\text{H}$  NMR (600 MHz,  $\text{CDCl}_3$ )  $\delta = 12.10$  (d,  $J = 13.2$  Hz, 1H), 8.88 (t,  $J = 7.2$  Hz, 2H), 7.92–7.64 (m, 3H), 7.64–7.47 (m, 2H), 7.11 (dd,  $J = 16.2, 7.2$  Hz, 2H), 7.01 (t,  $J = 6.6$  Hz, 1H), 6.95 (t,  $J = 6.6$  Hz, 1H), 6.94–6.78 (m, 4H), 6.81–6.69 (m, 2H), 6.65 (t,  $J = 7.2$  Hz, 1H), 6.58 (d,  $J = 7.2$  Hz, 1H), 6.42 (d,  $J = 8.4$  Hz, 1H).  $^{13}\text{C}$  NMR (150 MHz,  $\text{CDCl}_3$ )  $\delta = 204.3, 162.6, 143.1, 142.8, 141.9, 138.8, 135.9, 135.5, 133.8, 132.4, 131.9, 130.8, 130.5, 129.7, 128.9, 128.6, 128.0, 127.5, 127.4, 126.9, 126.8, 126.7, 126.5, 125.8, 125.6, 123.3, 121.9, 119.1, 117.7$ . HRMS (ESI)  $m/z$  calcd for  $\text{C}_{33}\text{H}_{22}\text{ClO}_2 + (\text{M} + \text{H})^+$  485.13028, found 485.13049.

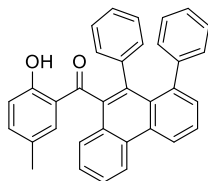

**(1,10-diphenylphenanthren-9-yl)(2-hydroxy-5-methylphenyl)methanone (11):**

Yield 86%; 39.9 mg; yellow solid; mp 249–251°C; TLC (PET:EtOAc, 100:1 v/v):  $R_f$  = 0.3;  $^1\text{H}$  NMR (600 MHz,  $\text{CDCl}_3$ )  $\delta$ =11.84 (s, 1H), 8.93–8.86 (m, 2H), 7.82–7.70 (m, 3H), 7.59 (t,  $J$  = 7.2 Hz, 1H), 7.50 (d,  $J$  = 7.2 Hz, 1H), 7.09 (d,  $J$  = 7.2 Hz, 2H), 7.04 (d,  $J$  = 8.4 Hz, 1H), 7.00 (t,  $J$  = 7.2 Hz, 1H), 6.90 (ddd,  $J$  = 30.6, 15.0, 7.8 Hz, 4H), 6.72 (d,  $J$  = 7.8 Hz, 2H), 6.64–6.57 (m, 3H), 1.92 (s, 3H).  $^{13}\text{C}$  NMR (150 MHz,  $\text{CDCl}_3$ )  $\delta$ =205.1, 160.1, 143.3, 142.8, 139.1, 137.4, 136.1, 135.6, 132.5, 132.4, 131.9, 131.9, 130.9, 130.6, 129.8, 129.0, 128.7, 128.3, 127.5, 127.3, 126.7, 126.4, 126.4, 126.0, 125.8, 123.3, 122.0, 120.1, 117.3, 20.0. HRMS (ESI)  $m/z$  calcd for  $\text{C}_{34}\text{H}_{25}\text{O}_2$ + ( $\text{M}+\text{H}$ ) $^+$  465.18491, found 465.18497.

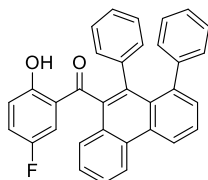

**(1,10-diphenylphenanthren-9-yl)(2-hydroxy-5-fluorophenyl)methanone (12):**

Yield 84%; 39.3 mg; yellow solid; mp 236–239°C; TLC (PET:EtOAc, 100:1 v/v):  $R_f$  = 0.3;  $^1\text{H}$  NMR (600 MHz,  $\text{CDCl}_3$ )  $\delta$ =11.67 (s, 1H), 8.82 (t,  $J$  = 7.2 Hz, 2H), 7.76–7.62 (m, 3H), 7.53 (t,  $J$  = 7.2 Hz, 1H), 7.44 (d,  $J$  = 7.2 Hz, 1H), 7.06 (t,  $J$  = 9.0 Hz, 2H), 6.95 (t,  $J$  = 7.2 Hz, 1H), 6.93–6.79 (m, 4H), 6.77 (d,  $J$  = 6.6 Hz, 1H), 6.69 (dd,  $J$  = 13.8, 8.4 Hz, 2H), 6.62–6.53 (m, 2H), 6.45–6.37 (m, 1H).  $^{13}\text{C}$  NMR (150 MHz,  $\text{CDCl}_3$ )  $\delta$ =204.4, 158.3, 155.0, 153.4, 143.2, 142.8, 138.9, 136.0, 135.3, 132.5, 132.1, 132.0, 130.9, 130.7, 129.8, 129.0, 128.6, 128.0, 127.6, 127.5, 127.0, 126.9, 126.6, 125.8, 125.6, 124.0, 123.8, 123.5, 122.0, 120.1, 120.0, 119.0, 118.9, 117.3, 117.2.  $^{19}\text{F}$  NMR (375 MHz,  $\text{CDCl}_3$ )  $\delta$ =124.61. HRMS (ESI)  $m/z$  calcd for  $\text{C}_{33}\text{H}_{21}\text{FO}_2$ + ( $\text{M}$ ) $^+$  468.15202, found 468.15210.

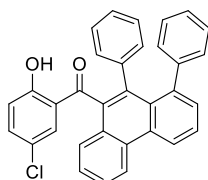

**(5-chloro-2-hydroxyphenyl)(1,10-diphenylphenanthren-9-yl)methanone (13):**

Yield 85%; 41.2 mg; yellow solid; mp 225–228°C; TLC (PET:EtOAc, 100:1 v/v):  $R_f$  = 0.3;  $^1\text{H}$  NMR (600 MHz,  $\text{CDCl}_3$ )  $\delta$ =11.93 (s, 1H), 8.91 (t,  $J$  = 8.4 Hz, 2H), 7.78 (ddd,  $J$  = 20.4, 13.8, 7.8 Hz, 3H), 7.62 (t,  $J$  = 7.2 Hz, 1H), 7.53 (d,  $J$  = 7.2 Hz, 1H), 7.18–7.08 (m, 3H), 7.03 (t,  $J$  = 7.2 Hz, 1H), 6.95 (t,  $J$  = 7.2 Hz, 1H), 6.90 (dd,  $J$  = 14.4, 7.2 Hz, 2H), 6.84 (d,  $J$  = 7.2 Hz, 1H), 6.76 (d,  $J$  = 9.0 Hz, 3H), 6.69

(t,  $J = 7.2$  Hz, 1H), 6.65 (d,  $J = 7.2$  Hz, 1H).  $^{13}\text{C}$  NMR (150 MHz,  $\text{CDCl}_3$ )  $\delta = 204.4$ , 160.6, 143.1, 142.8, 138.9, 136.1, 136.0, 135.2, 132.5, 132.1, 131.9, 131.6, 131.0, 130.8, 129.9, 128.9, 128.4, 127.9, 127.7, 127.5, 126.8, 126.5, 125.8, 125.5, 123.5, 122.9, 122.1, 120.9, 119.2. HRMS (ESI)  $m/z$  calcd for  $\text{C}_{33}\text{H}_{21}\text{ClO}_2^+$  ( $\text{M}$ ) $^+$  484.12246, found 484.12259.

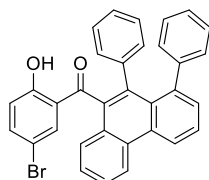

**(5-bromo-2-hydroxyphenyl)(1,10-diphenylphenanthren-9-yl)methanone (14):**

Yield 89%; 47.0 mg; yellow solid; mp 216–220°C; TLC (PET:EtOAc, 100:1 v/v):  $R_f = 0.3$ ;  $^1\text{H}$  NMR (600 MHz,  $\text{CDCl}_3$ )  $\delta = 8.75$  (t,  $J = 8.4$  Hz, 2H), 7.63 (dt,  $J = 24.0$ , 7.8 Hz, 2H), 7.57 (d,  $J = 7.8$  Hz, 1H), 7.46 (t,  $J = 7.2$  Hz, 1H), 7.36 (d,  $J = 6.0$  Hz, 1H), 7.11 (d,  $J = 8.4$  Hz, 1H), 6.97 (s, 1H), 6.93 (s, 1H), 6.87 (s, 1H), 6.78 (s, 1H), 6.71 (s, 3H), 6.67 (d,  $J = 5.4$  Hz, 1H), 6.58 (s, 1H), 6.54 (d,  $J = 9.0$  Hz, 2H), 6.47 (d,  $J = 5.4$  Hz, 1H).  $^{13}\text{C}$  NMR (150 MHz,  $\text{CDCl}_3$ )  $\delta = 204.4$ , 161.0, 143.1, 142.8, 139.0, 138.9, 136.0, 135.1, 134.7, 132.6, 132.1, 131.8, 131.0, 130.8, 129.9, 129.0, 128.4, 127.8, 127.5, 127.0, 126.9, 126.6, 125.7, 125.5, 123.5, 122.1, 121.5, 119.6, 109.8. HRMS (ESI)  $m/z$  calcd for  $\text{C}_{33}\text{H}_{22}\text{BrO}_2^+$  ( $\text{M}+\text{H}$ ) $^+$  529.07977, found 529.07984.

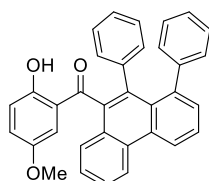

**(1,10-diphenylphenanthren-9-yl)(2-hydroxy-5-methoxyphenyl)methanone (15):**

Yield 64%; 30.7 mg; yellow solid; mp 244–247°C; TLC (PET:EtOAc, 50:1 v/v):  $R_f = 0.3$ ;  $^1\text{H}$  NMR (600 MHz,  $\text{CDCl}_3$ )  $\delta = 11.58$  (s, 1H), 8.91–8.81 (m, 2H), 7.77 (d,  $J = 7.8$  Hz, 1H), 7.72 (d,  $J = 7.8$  Hz, 1H), 7.67 (d,  $J = 7.8$  Hz, 1H), 7.57 (d,  $J = 7.2$  Hz, 1H), 7.47 (d,  $J = 7.2$  Hz, 1H), 7.10–7.02 (m, 2H), 6.97 (s, 1H), 6.93–6.81 (m, 5H), 6.72 (dd,  $J = 16.2$ , 8.4 Hz, 2H), 6.60 (d,  $J = 10.2$  Hz, 2H), 6.25 (d,  $J = 2.4$  Hz, 1H), 3.37 (s, 3H).  $^{13}\text{C}$  NMR (150 MHz,  $\text{CDCl}_3$ )  $\delta = 204.8$ , 156.7, 151.1, 143.3, 142.8, 139.1, 135.9, 135.7, 132.5, 132.0, 130.9, 130.7, 129.8, 129.0, 127.6, 127.4, 127.1, 127.0, 126.8, 126.7, 126.5, 125.9, 125.8, 124.3, 123.4, 122.0, 120.1, 118.5, 115.6, 55.7. HRMS (ESI)  $m/z$  calcd for  $\text{C}_{34}\text{H}_{25}\text{O}_3^+$  ( $\text{M}+\text{H}$ ) $^+$  481.17982, found 481.17985.

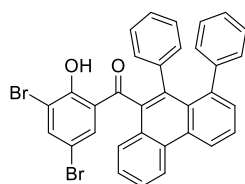

**(3,5-dibromo-2-hydroxyphenyl)(1,10-diphenylphenanthren-9-yl)methanone (16):**  
 Yield 91%; 55.1 mg; yellow solid; mp 201–204°C; TLC (PET:EtOAc, 100:1 v/v):  $R_f$  = 0.3;  $^1\text{H}$  NMR (600 MHz,  $\text{CDCl}_3$ )  $\delta$ =12.57 (s, 1H), 8.90 (t,  $J$  = 7.8 Hz, 2H), 7.83–7.79 (m, 1H), 7.78–7.74 (m, 1H), 7.65 (d,  $J$  = 7.8 Hz, 1H), 7.63–7.59 (m, 1H), 7.55 (s, 1H), 7.52 (d,  $J$  = 6.6 Hz, 1H), 7.12 (d,  $J$  = 7.2 Hz, 1H), 7.05 (d,  $J$  = 7.2 Hz, 1H), 7.03–6.99 (m, 1H), 6.93 (t,  $J$  = 7.2 Hz, 1H), 6.87 (s, 2H), 6.79 (d,  $J$  = 8.4 Hz, 2H), 6.74 (t,  $J$  = 7.2 Hz, 1H), 6.70–6.65 (m, 1H), 6.59 (d,  $J$  = 7.2 Hz, 1H).  $^{13}\text{C}$  NMR (150 MHz,  $\text{CDCl}_3$ )  $\delta$ =204.2, 157.7, 143.0, 142.9, 141.1, 138.8, 136.2, 134.6, 134.0, 132.6, 132.2, 131.8, 131.0, 130.8, 129.9, 128.9, 128.3, 127.8, 127.7, 127.6, 127.2, 127.1, 125.9, 125.3, 123.6, 122.1, 121.7, 112.1, 109.8. HRMS (ESI)  $m/z$  calcd for  $\text{C}_{33}\text{H}_{20}\text{Br}_2\text{O}_2\text{Na}^+$  ( $\text{M}+\text{Na}$ ) $^+$  630.97047, found 630.97017.

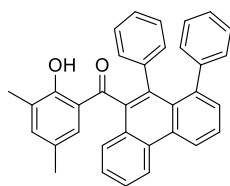

**(1,10-diphenylphenanthren-9-yl)(2-hydroxy-3,5-dimethylphenyl)methanone (17):**  
 Yield 90%; 43.0 mg; yellow solid; mp 147–150°C; TLC (PET:EtOAc, 100:1 v/v):  $R_f$  = 0.3;  $^1\text{H}$  NMR (600 MHz,  $\text{CDCl}_3$ )  $\delta$ =12.18 (s, 1H), 8.90 (dd,  $J$  = 13.8, 8.4 Hz, 2H), 7.83–7.70 (m, 3H), 7.58 (t,  $J$  = 7.8 Hz, 1H), 7.51 (d,  $J$  = 7.2 Hz, 1H), 7.14–7.06 (m, 2H), 7.01 (t,  $J$  = 7.2 Hz, 1H), 6.97–6.89 (m, 3H), 6.87 (t,  $J$  = 7.2 Hz, 2H), 6.73 (t,  $J$  = 6.6 Hz, 1H), 6.67–6.61 (m, 2H), 6.50 (s, 1H), 2.16 (s, 3H), 1.90 (s, 3H).  $^{13}\text{C}$  NMR (150 MHz,  $\text{CDCl}_3$ )  $\delta$ =205.1, 158.7, 143.3, 142.8, 139.2, 138.5, 136.4, 135.5, 132.4, 131.9, 130.8, 130.6, 130.1, 129.8, 129.0, 128.8, 128.4, 127.5, 127.3, 126.9, 126.7, 126.6, 126.5, 126.4, 126.1, 125.7, 123.2, 121.9, 119.5, 20.1, 15.2. HRMS (ESI)  $m/z$  calcd for  $\text{C}_{35}\text{H}_{27}\text{O}_2^+$  ( $\text{M}+\text{H}$ ) $^+$  479.20056, found 479.20058.

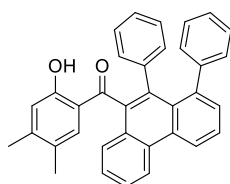

**(1,10-diphenylphenanthren-9-yl)(2-hydroxy-4,5-dimethylphenyl)methanone (18):**  
 Yield 88%; 42.1 mg; yellow solid; mp 272–275°C; TLC (PET:EtOAc, 100:1 v/v):  $R_f$  = 0.3;  $^1\text{H}$  NMR (600 MHz,  $\text{CDCl}_3$ )  $\delta$ =11.87 (s, 1H), 8.89 (dd,  $J$  = 14.4, 8.4 Hz, 2H), 7.82–7.69 (m, 3H), 7.57 (t,  $J$  = 7.8 Hz, 1H), 7.49 (d,  $J$  = 7.2 Hz, 1H), 7.08 (d,  $J$  = 6.6 Hz, 2H), 6.99 (t,  $J$  = 7.2 Hz, 1H), 6.95–6.88 (m, 2H), 6.87 (d,  $J$  = 19.8 Hz, 2H), 6.72 (t,  $J$  = 7.2 Hz, 1H), 6.61 (q,  $J$  = 9.0 Hz, 3H), 6.55 (s, 1H), 2.10 (s, 3H), 1.82 (s, 3H).  $^{13}\text{C}$  NMR (150 MHz,  $\text{CDCl}_3$ )  $\delta$ =203.9, 160.2, 146.7, 143.0, 142.5, 138.8, 135.9, 135.1, 132.6, 132.0, 131.6, 131.5, 130.5, 130.3, 129.5, 128.7, 128.5, 128.0, 127.5, 127.3, 126.8, 126.6, 126.2, 125.7, 125.4, 122.9, 121.6, 118.2, 117.8, 20.1, 18.1. HRMS (ESI)  $m/z$  calcd for  $\text{C}_{35}\text{H}_{27}\text{O}_2^+$  ( $\text{M}+\text{H}$ ) $^+$  479.20056, found 479.20016.

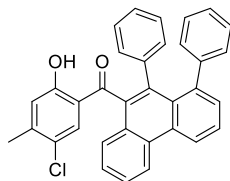

**(5-chloro-2-hydroxy-4-methylphenyl)(1,10-diphenylphenanthren-9-yl)methanone (19):**

Yield 87%; 43.3 mg; white solid; mp 219–222°C; TLC (PET:EtOAc, 100:1 v/v):  $R_f$  = 0.3;  $^1\text{H}$  NMR (600 MHz,  $\text{CDCl}_3$ )  $\delta$ =11.84 (s, 1H), 8.89 (t,  $J$  = 9.6 Hz, 2H), 7.79 (t,  $J$  = 7.8 Hz, 1H), 7.75 (t,  $J$  = 7.8 Hz, 1H), 7.68 (d,  $J$  = 7.8 Hz, 1H), 7.58 (t,  $J$  = 7.2 Hz, 1H), 7.49 (d,  $J$  = 7.2 Hz, 1H), 7.08 (dd,  $J$  = 18.0, 7.2 Hz, 2H), 6.99 (t,  $J$  = 7.2 Hz, 1H), 6.94–6.90 (m, 1H), 6.90–6.78 (m, 3H), 6.78–6.62 (m, 4H), 6.61 (d,  $J$  = 7.2 Hz, 1H), 2.19 (s, 3H).  $^{13}\text{C}$  NMR (150 MHz,  $\text{CDCl}_3$ )  $\delta$ =203.9, 160.5, 145.6, 143.2, 142.8, 139.0, 135.9, 135.4, 132.5, 132.1, 132.0, 131.9, 130.9, 130.7, 129.9, 129.0, 128.6, 128.0, 127.6, 127.5, 127.0, 126.9, 126.9, 126.6, 125.7, 123.6, 122.1, 119.7, 119.4, 20.7. HRMS (ESI)  $m/z$  calcd for  $\text{C}_{34}\text{H}_{24}\text{ClO}_2$  + ( $\text{M}+\text{H}$ ) $^+$  499.14593, found 499.14609.

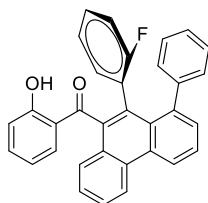

**(10-(2-fluorophenyl)-1-phenylphenanthren-9-yl)(2-hydroxyphenyl)methanone (20):**

Yield 82%; 38.4 mg; white solid; mp 197–199°C; TLC (PET:EtOAc, 100:1 v/v):  $R_f$  = 0.3;  $^1\text{H}$  NMR (600 MHz,  $\text{CDCl}_3$ )  $\delta$ =11.83 (s, 1H), 11.75 (s, 1H), 8.86 (dt,  $J$  = 16.8, 8.4 Hz, 2H), 7.79–7.60 (m, 3H), 7.54 (dd,  $J$  = 12.6, 5.4 Hz, 1H), 7.41 (dd,  $J$  = 18.0, 7.2 Hz, 1H), 7.31–7.17 (m, 2H), 7.13–7.05 (m, 1H), 7.04–6.97 (m, 1H), 6.97–6.86 (m, 2H), 6.86–6.79 (m, 1H), 6.78–6.65 (m, 3H), 6.46 (ddd,  $J$  = 46.8, 28.2, 19.8 Hz, 2H), 6.13 (d,  $J$  = 7.8 Hz, 1H).  $^{13}\text{C}$  NMR (150 MHz,  $\text{CDCl}_3$ )  $\delta$ =204.9, 203.9, 162.1, 162.0, 159.3, 157.7, 142.7, 142.4, 142.4, 136.9, 136.6, 136.4, 133.9, 133.0, 132.7, 132.2, 132.0, 131.9, 131.7, 131.3, 130.4, 130.2, 129.8, 129.4, 129.3, 128.6, 128.2, 128.1, 128.1, 127.7, 127.5, 127.5, 127.2, 126.9, 126.8, 126.7, 126.6, 126.2, 126.0, 123.5, 122.8, 122.6, 122.4, 120.8, 120.4, 118.7, 118.6, 117.9, 117.4, 115.2, 114.6, 114.5.  $^{19}\text{F}$  NMR (375 MHz,  $\text{CDCl}_3$ )  $\delta$ =108.43, 109.52. HRMS (ESI)  $m/z$  calcd for  $\text{C}_{33}\text{H}_{22}\text{FO}_2$  + ( $\text{M}+\text{H}$ ) $^+$  469.15984, found 469.15996.

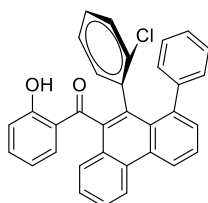

**(10-(2-chlorophenyl)-1-phenylphenanthren-9-yl)(2-hydroxyphenyl)methanone (21):**

Yield 60%; 29.0 mg; white solid; mp 214–217°C; TLC (PET:EtOAc, 100:1 v/v):  $R_f = 0.3$ ;  $^1\text{H NMR}$  (600 MHz,  $\text{CDCl}_3$ )  $\delta=11.86$  (s, 1H), 8.96–8.88 (m, 2H), 7.78 (dd,  $J = 17.4, 8.4$  Hz, 2H), 7.73 (d,  $J = 7.8$  Hz, 1H), 7.62–7.58 (m, 1H), 7.47 (d,  $J = 6.6$  Hz, 1H), 7.42 (d,  $J = 9.0$  Hz, 1H), 7.25 (dd,  $J = 14.4, 7.2$  Hz, 2H), 7.05–7.01 (m, 1H), 6.99–6.92 (m, 3H), 6.87–6.83 (m, 1H), 6.79 (d,  $J = 6.0$  Hz, 2H), 6.71–6.66 (m, 1H), 6.59 (d,  $J = 7.8$  Hz, 1H), 6.50 (d,  $J = 7.2$  Hz, 1H).  $^{13}\text{C NMR}$  (150 MHz,  $\text{CDCl}_3$ )  $\delta=205.1, 161.8, 142.4, 136.9, 136.8, 136.6, 136.5, 134.9, 133.6, 133.2, 133.2, 132.6, 132.5, 132.0, 131.9, 131.7, 131.5, 130.3, 128.9, 128.7, 128.6, 128.3, 128.2, 128.1, 127.8, 127.6, 127.5, 127.3, 126.7, 126.4, 126.3, 126.2, 126.1, 125.4, 125.2, 123.5, 122.4, 120.4, 118.9, 118.5, 118.0, 117.2$ . HRMS (ESI)  $m/z$  calcd for  $\text{C}_{33}\text{H}_{21}\text{ClO}_2\text{Na}^+$  ( $\text{M}+\text{Na}$ ) $^+$  507.11223, found 507.11229.

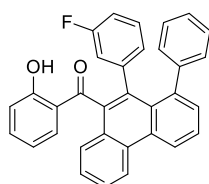

**(10-(3-fluorophenyl)-1-phenylphenanthren-9-yl)(2-hydroxyphenyl)methanone (22):**

Yield 76%; 35.5 mg; white solid; mp 195–198°C; TLC (PET:EtOAc, 100:1 v/v):  $R_f = 0.3$ ;  $^1\text{H NMR}$  (600 MHz,  $\text{CDCl}_3$ )  $\delta=11.89$  (d,  $J = 2.4$  Hz, 1H), 8.88–8.74 (m, 2H), 7.76–7.61 (m, 3H), 7.51 (dd,  $J = 15.0, 7.8$  Hz, 1H), 7.47–7.40 (m, 1H), 7.23–7.15 (m, 1H), 7.12–7.02 (m, 1H), 7.01–6.86 (m, 3H), 6.86–6.71 (m, 4H), 6.55–6.49 (m, 1H), 6.38 (ddd,  $J = 28.2, 13.2, 7.8$  Hz, 2H), 6.22 (d,  $J = 9.6$  Hz, 1H).  $^{13}\text{C NMR}$  (150 MHz,  $\text{CDCl}_3$ )  $\delta=204.9, 204.8, 162.4, 162.2, 162.1, 161.9, 160.5, 160.3, 143.2, 143.1, 142.7, 142.6, 141.2, 141.2, 141.1, 136.7, 136.1, 136.2, 136.2, 134.4, 134.3, 133.1, 132.8, 132.5, 132.4, 132.2, 132.0, 130.8, 130.8, 130.0, 130.0, 129.2, 129.1, 128.8, 128.8, 128.7, 128.5, 128.4, 128.3, 128.2, 128.2, 128.0, 127.8, 127.7, 127.6, 127.5, 127.2, 126.9, 126.9, 126.6, 126.2, 126.2, 126.1, 123.5, 122.2, 122.1, 120.7, 120.4, 119.4, 119.2, 118.7, 118.7, 118.0, 117.9, 117.8, 117.8, 113.6, 113.6, 113.5, 113.4$ .  $^{19}\text{F NMR}$  (375 MHz,  $\text{CDCl}_3$ )  $\delta=114.81, 115.53$ . HRMS (ESI)  $m/z$  calcd for  $\text{C}_{33}\text{H}_{22}\text{FO}_2^+$  ( $\text{M}+\text{H}$ ) $^+$  469.15984, found 469.15991.

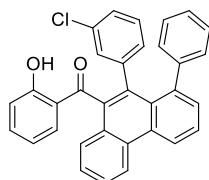

**(10-(3-chlorophenyl)-1-phenylphenanthren-9-yl)(2-hydroxyphenyl)methanone (23):**

Yield 81%; 39.2 mg; white solid; mp 187–190°C; TLC (PET:EtOAc, 100:1 v/v):  $R_f = 0.3$ ;  $^1\text{H NMR}$  (600 MHz,  $\text{CDCl}_3$ )  $\delta=11.86$  (d,  $J = 2.4$  Hz, 1H), 8.89–8.73 (m, 2H), 7.77–7.60 (m, 3H), 7.51 (dd,  $J = 17.4, 7.8$  Hz, 1H), 7.44 (dd,  $J = 10.8, 7.2$  Hz, 1H),

7.20 (dt,  $J = 6.6, 6.0$  Hz, 1H), 7.13–7.07 (m, 1H), 6.96 (ddt,  $J = 27.0, 14.4, 7.2$  Hz, 4H), 6.78 (ddt,  $J = 25.2, 21.0, 8.4$  Hz, 4H), 6.64 (dd,  $J = 24.6, 7.8$  Hz, 1H), 6.56–6.34 (m, 3H).  $^{13}\text{C}$  NMR (150 MHz,  $\text{CDCl}_3$ )  $\delta = 204.9, 204.7, 162.3, 162.2, 143.1, 143.0, 142.6, 142.6, 140.7, 136.7, 136.6, 136.3, 134.3, 134.1, 133.0, 132.9, 132.7, 132.6, 132.4, 132.3, 132.2, 132.0, 131.2, 130.8, 130.6, 130.0, 130.0, 129.2, 129.1, 128.6, 128.6, 128.4, 128.3, 128.2, 128.1, 128.1, 127.8, 127.7, 127.5, 127.5, 127.2, 126.9, 126.9, 126.9, 126.7, 126.6, 126.3, 126.2, 126.1, 123.5, 122.2, 122.2, 120.8, 120.4, 118.7, 117.9, 117.8$ . HRMS (ESI)  $m/z$  calcd for  $\text{C}_{33}\text{H}_{22}\text{ClO}_2 + (\text{M}+\text{H})^+$  485.13028, found 485.13159.

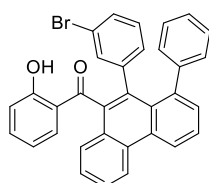

**(10-(3-bromophenyl)-1-phenylphenanthren-9-yl)(2-hydroxyphenyl)methanone (24):**

Yield 87%; 45.9 mg; yellow solid; mp 185–188°C; TLC (PET:EtOAc, 100:1 v/v):  $R_f = 0.3$ ;  $^1\text{H}$  NMR (600 MHz,  $\text{CDCl}_3$ )  $\delta = 11.95$  (s, 1H), 8.98–8.86 (m, 2H), 7.86–7.71 (m, 3H), 7.67–7.59 (m, 1H), 7.54 (dd,  $J = 11.4, 7.2$  Hz, 1H), 7.37–7.17 (m, 3H), 7.12 (d,  $J = 6.6$  Hz, 1H), 7.03 (dd,  $J = 26.4, 6.6$  Hz, 2H), 6.97–6.83 (m, 4H), 6.79–6.74 (m, 1H), 6.62–6.45 (m, 2H).  $^{13}\text{C}$  NMR (150 MHz,  $\text{CDCl}_3$ )  $\delta = 204.9, 204.7, 162.3, 162.2, 143.1, 142.9, 142.6, 142.5, 141.0, 136.8, 136.6, 136.3, 135.2, 134.2, 134.1, 133.0, 132.7, 132.4, 132.3, 132.2, 132.0, 130.9, 130.5, 130.4, 130.2, 129.5, 129.5, 129.2, 129.1, 129.0, 128.5, 128.3, 128.2, 128.2, 128.1, 127.8, 127.5, 127.5, 127.2, 126.9, 126.9, 126.3, 126.2, 126.1, 123.5, 122.3, 122.2, 121.4, 121.1, 120.8, 120.3, 118.7, 118.0, 117.8$ . HRMS (ESI)  $m/z$  calcd for  $\text{C}_{33}\text{H}_{22}\text{BrO}_2 + (\text{M}+\text{H})^+$  529.07977, found 529.07984.

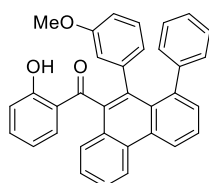

**(2-hydroxyphenyl)(10-(3-methoxyphenyl)-1-phenylphenanthren-9-yl)methanone (25):**

Yield 85%; 40.8 mg; white solid; mp 153–156°C; TLC (PET:EtOAc, 50:1 v/v):  $R_f = 0.3$ ;  $^1\text{H}$  NMR (600 MHz,  $\text{CDCl}_3$ )  $\delta = 11.99$  (s, 0.5H), 11.91 (s, 0.5H), 8.88–8.71 (m, 2H), 7.81–7.55 (m, 3H), 7.55–7.35 (m, 2H), 7.17 (dd,  $J = 8.4, 4.8$  Hz, 1H), 7.07 (d,  $J = 7.2$  Hz, 1H), 7.00 (d,  $J = 6.6$  Hz, 1H), 6.99–6.62 (m, 7H), 6.60 (s, 1H), 6.51–6.35 (m, 2H), 6.19 (dd,  $J = 44.4, 7.8$  Hz, 2H), 6.04 (s, 1H), 3.61 (s, 1H), 3.30 (s, 2H).  $^{13}\text{C}$  NMR (150 MHz,  $\text{CDCl}_3$ )  $\delta = 205.4, 205.1, 162.3, 162.2, 158.0, 157.6, 143.3, 143.3, 143.0, 142.8, 140.4, 140.2, 136.5, 136.4, 135.9, 135.8, 135.7, 135.6, 133.2, 133.0, 132.5, 132.2, 131.9, 130.6, 129.2, 129.2, 128.6, 128.3, 128.3, 128.1, 127.7,$

127.6, 127.5, 127.2, 127.1, 126.8, 126.0, 126.0, 125.9, 125.1, 123.6, 123.4, 122.2, 122.0, 120.9, 120.7, 118.6, 118.5, 117.8, 117.7, 117.4, 116.1, 113.4, 113.3, 55.2, 54.8. HRMS (ESI)  $m/z$  calcd for  $C_{34}H_{25}O_3+$  ( $M+H$ )<sup>+</sup> 481.17982, found 481.17986.

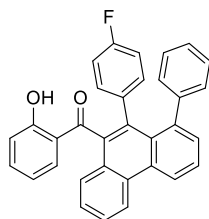

**(10-(4-fluorophenyl)-1-phenylphenanthren-9-yl)(2-hydroxyphenyl)methanone (26):**

Yield 77%; 36.0 mg; yellow solid; mp 269–272°C; TLC (PET:EtOAc, 100:1 v/v):  $R_f$  = 0.3; <sup>1</sup>H NMR (600 MHz, CDCl<sub>3</sub>)  $\delta$ =11.89 (s, 1H), 8.85 (t,  $J$  = 9.6 Hz, 2H), 7.73 (dt,  $J$  = 15.6, 7.2 Hz, 2H), 7.66 (d,  $J$  = 7.8 Hz, 1H), 7.55 (t,  $J$  = 7.2 Hz, 1H), 7.46 (d,  $J$  = 7.2 Hz, 1H), 7.23 (d,  $J$  = 8.4 Hz, 1H), 6.99 (d,  $J$  = 28.2 Hz, 4H), 6.92–6.87 (m, 1H), 6.79 (dd,  $J$  = 19.2, 8.4 Hz, 3H), 6.51 (dd,  $J$  = 15.0, 6.6 Hz, 2H), 6.44 (t,  $J$  = 7.2 Hz, 1H), 6.25 (t,  $J$  = 7.2 Hz, 1H). <sup>13</sup>C NMR (150 MHz, CDCl<sub>3</sub>)  $\delta$ =205.1, 162.3, 161.9, 160.2, 143.3, 142.6, 136.6, 136.2, 134.9, 134.7, 133.7, 132.9, 132.4, 132.0, 130.8, 129.8, 128.9, 128.2, 127.6, 127.0, 126.7, 125.9, 123.4, 122.1, 120.5, 118.6, 117.8, 113.8. <sup>19</sup>F NMR (375 MHz, CDCl<sub>3</sub>)  $\delta$ =115.65. HRMS (ESI)  $m/z$  calcd for  $C_{33}H_{21}FO_2Na+$  ( $M+Na$ )<sup>+</sup> 491.14178, found 491.14185.

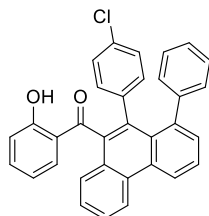

**(10-(4-chlorophenyl)-1-phenylphenanthren-9-yl)(2-hydroxyphenyl)methanone (27):**

Yield 80%; 38.7 mg; yellow solid; mp 237–239°C; TLC (PET:EtOAc, 100:1 v/v):  $R_f$  = 0.3; <sup>1</sup>H NMR (600 MHz, CDCl<sub>3</sub>)  $\delta$ =11.90 (s, 1H), 8.88–8.80 (m, 2H), 7.77–7.68 (m, 2H), 7.65 (d,  $J$  = 7.8 Hz, 1H), 7.56–7.52 (m, 1H), 7.45 (d,  $J$  = 7.2 Hz, 1H), 7.26–7.21 (m, 1H), 7.03–6.94 (m, 4H), 6.89 (s, 1H), 6.80 (dd,  $J$  = 18.0, 9.0 Hz, 3H), 6.75 (d,  $J$  = 7.2 Hz, 1H), 6.52 (d,  $J$  = 7.8 Hz, 1H), 6.44 (dd,  $J$  = 12.6, 7.2 Hz, 2H). <sup>13</sup>C NMR (150 MHz, CDCl<sub>3</sub>)  $\delta$ =204.9, 162.3, 143.2, 142.5, 137.4, 136.6, 136.1, 134.4, 133.2, 132.8, 132.4, 132.3, 131.9, 130.7, 129.8, 129.1, 128.8, 128.4, 128.1, 127.9, 126.8, 126.7, 126.0, 125.9, 123.3, 122.1, 120.5, 118.6, 117.9. HRMS (ESI)  $m/z$  calcd for  $C_{33}H_{21}ClO_2Na+$  ( $M+Na$ )<sup>+</sup> 507.11223, found 507.11228.



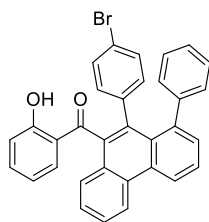

**(10-(4-bromophenyl)-1-phenylphenanthren-9-yl)(2-hydroxyphenyl)methanone (28):**

Yield 84%; 44.3 mg; white solid; mp 225–228°C; TLC (PET:EtOAc, 100:1 v/v):  $R_f = 0.3$ ;  $^1\text{H NMR}$  (600 MHz,  $\text{CDCl}_3$ )  $\delta=12.04$  (s, 1H), 8.99–8.83 (m, 2H), 7.78 (dd,  $J = 24.0, 7.2$  Hz, 3H), 7.64–7.57 (m, 1H), 7.52 (d,  $J = 6.6$  Hz, 1H), 7.34–7.28 (m, 1H), 7.06 (dd,  $J = 26.4, 13.2$  Hz, 4H), 7.02–6.94 (m, 2H), 6.91 (d,  $J = 7.8$  Hz, 2H), 6.82 (d,  $J = 7.2$  Hz, 1H), 6.77 (d,  $J = 7.8$  Hz, 1H), 6.50 (dd,  $J = 12.6, 7.2$  Hz, 2H).  $^{13}\text{C NMR}$  (150 MHz,  $\text{CDCl}_3$ )  $\delta=204.8, 162.2, 143.0, 142.4, 137.8, 136.6, 135.9, 134.3, 133.4, 132.7, 132.2, 132.1, 131.9, 130.6, 129.9, 129.8, 129.0, 128.6, 128.0, 127.4, 126.7, 125.9, 125.7, 123.3, 122.0, 120.8, 120.4, 118.6, 117.8$ . HRMS (ESI)  $m/z$  calcd for  $\text{C}_{33}\text{H}_{22}\text{BrO}_2 + (\text{M}+\text{H})^+$  529.07977, found 529.07986.

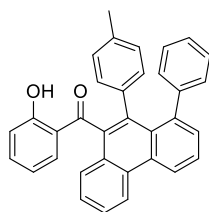

**(2-hydroxyphenyl)(1-phenyl-10-(p-tolyl)phenanthren-9-yl)methanone (29):**

Yield 69%; 32.0 mg; yellow solid; mp 195–197°C; TLC (PET:EtOAc, 100:1 v/v):  $R_f = 0.3$ ;  $^1\text{H NMR}$  (600 MHz,  $\text{CDCl}_3$ )  $\delta=11.95$  (s, 1H), 8.86 (t,  $J = 8.4$  Hz, 2H), 7.73 (d,  $J = 22.8$  Hz, 2H), 7.65 (d,  $J = 8.4$  Hz, 1H), 7.55 (d,  $J = 7.2$  Hz, 1H), 7.45 (d,  $J = 7.2$  Hz, 1H), 7.23 (d,  $J = 8.4$  Hz, 1H), 6.99 (s, 1H), 6.96–6.89 (m, 3H), 6.85 (d,  $J = 7.8$  Hz, 2H), 6.82–6.77 (m, 2H), 6.61 (d,  $J = 7.2$  Hz, 1H), 6.46 (d,  $J = 7.2$  Hz, 1H), 6.40 (d,  $J = 7.8$  Hz, 1H), 6.34 (d,  $J = 7.8$  Hz, 1H), 2.00 (s, 3H).  $^{13}\text{C NMR}$  (150 MHz,  $\text{CDCl}_3$ )  $\delta=205.3, 162.2, 143.4, 142.9, 136.3, 136.0, 135.9, 133.1, 132.4, 132.0, 131.9, 130.7, 130.6, 129.8, 129.6, 129.2, 129.1, 128.3, 128.0, 127.1, 127.0, 127.1, 125.9, 125.3, 123.3, 122.0, 120.7, 118.5, 117.6, 20.8$ . HRMS (ESI)  $m/z$  calcd for  $\text{C}_{34}\text{H}_{24}\text{O}_2\text{Na} + (\text{M}+\text{Na})^+$  487.16685, found 487.16694.

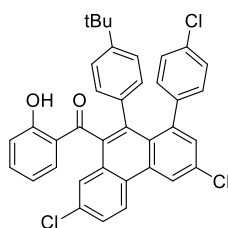

**(10-(4-(tert-butyl)phenyl)-3,7-dichloro-1-(4-chlorophenyl)phenanthren-9-yl)(2-hydroxyphenyl)methanone (30):**

Yield 65%; 39.5 mg; yellow solid; mp 258–260°C; TLC (PET:EtOAc, 100:1 v/v):  $R_f = 0.3$ ;  $^1\text{H NMR}$  (600 MHz,  $\text{CDCl}_3$ )  $\delta=11.66$  (s, 1H), 8.77 (s, 1H), 8.69 (d,  $J = 9.0$  Hz, 1H), 7.68 (d,  $J = 8.4$  Hz, 2H), 7.41 (d,  $J = 1.8$  Hz, 1H), 7.23 (t,  $J = 7.2$  Hz, 1H), 6.96–6.87 (m, 4H), 6.82–6.74 (m, 3H), 6.66 (d,  $J = 7.8$  Hz, 1H), 6.57 (d,  $J = 7.8$  Hz, 1H), 6.46 (t,  $J = 7.8$  Hz, 1H), 6.36 (d,  $J = 7.8$  Hz, 1H), 1.11 (s, 9H).  $^{13}\text{C NMR}$  (150 MHz,  $\text{CDCl}_3$ )  $\delta=203.7$ , 162.0, 149.8, 143.3, 140.1, 136.6, 136.4, 135.2, 134.8, 134.2, 133.1, 133.0, 132.5, 132.0, 131.8, 131.7, 130.4, 130.1, 129.5, 128.2, 128.0, 127.0, 126.9, 124.9, 123.8, 121.8, 120.3, 118.3, 117.5, 34.0, 30.8. HRMS (ESI)  $m/z$  calcd for  $\text{C}_{37}\text{H}_{28}\text{Cl}_3\text{O}_2^+$  ( $\text{M}+\text{H}$ ) $^+$  609.11494, found 609.11503.

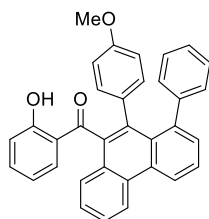

**(2-hydroxyphenyl)(10-(4-methoxyphenyl)-1-phenylphenanthren-9-yl)methanone (31):**

Yield 78%; 37.4 mg; yellow solid; mp 180–183°C; TLC (PET:EtOAc, 50:1 v/v):  $R_f = 0.3$ ;  $^1\text{H NMR}$  (600 MHz,  $\text{CDCl}_3$ )  $\delta=12.19$  (s, 1H), 9.00–8.84 (m, 2H), 7.85–7.70 (m, 3H), 7.65–7.51 (m, 2H), 7.30–7.25 (m, 1H), 7.19–7.09 (m, 3H), 7.06–7.01 (m, 1H), 6.93 (ddd,  $J = 29.4$ , 20.4, 6.6 Hz, 4H), 6.57 (d,  $J = 8.4$  Hz, 1H), 6.49 (s, 2H), 6.23 (d,  $J = 8.4$  Hz, 1H), 3.63 (s, 3H).  $^{13}\text{C NMR}$  (150 MHz,  $\text{CDCl}_3$ )  $\delta=205.4$ , 162.4, 157.9, 143.6, 142.9, 136.5, 136.1, 135.6, 133.2, 132.5, 132.1, 131.5, 130.8, 129.9, 129.7, 129.2, 128.4, 127.7, 127.4, 127.0, 126.7, 125.8, 123.5, 122.2, 120.7, 118.7, 117.8, 113.1, 112.3, 55.1. HRMS (ESI)  $m/z$  calcd for  $\text{C}_{34}\text{H}_{24}\text{O}_3^+$  ( $\text{M}^+$ ) $^+$  480.17199, found 480.17277.

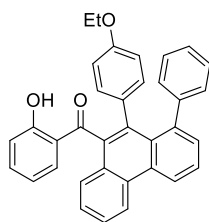

**(10-(4-ethoxyphenyl)-1-phenylphenanthren-9-yl)(2-hydroxyphenyl)methanone (32):**

Yield 81%; 40.0 mg; white solid; mp 192–195°C; TLC (PET:EtOAc, 50:1 v/v):  $R_f = 0.3$ ;  $^1\text{H NMR}$  (600 MHz,  $\text{CDCl}_3$ )  $\delta=12.00$  (s, 1H), 8.78 (t,  $J = 9.0$  Hz, 2H), 7.71–7.56 (m, 3H), 7.52–7.36 (m, 2H), 7.14 (t,  $J = 7.8$  Hz, 1H), 7.02 (d,  $J = 7.2$  Hz, 1H), 6.96 (dd,  $J = 11.4$ , 4.8 Hz, 2H), 6.89 (t,  $J = 7.2$  Hz, 1H), 6.84 (t,  $J = 7.2$  Hz, 1H), 6.82–6.69 (m, 3H), 6.36 (ddd,  $J = 17.4$ , 8.4, 4.8 Hz, 3H), 6.07 (dd,  $J = 8.4$ , 2.4 Hz, 1H), 3.73 (dd,  $J = 9.6$ , 4.2 Hz, 2H), 1.22 (t,  $J = 7.2$  Hz, 3H).  $^{13}\text{C NMR}$  (150 MHz,  $\text{CDCl}_3$ )  $\delta=205.4$ , 162.4, 157.1, 143.6, 142.9, 136.4, 136.0, 135.7, 133.3, 133.1, 132.5, 132.1, 131.4, 130.8, 129.8, 129.3, 129.0, 128.4, 127.6, 127.4, 127.0, 126.7, 125.9, 125.7,

123.4, 122.1, 120.7, 118.6, 117.8, 113.8, 113.0, 63.2, 14.7. HRMS (ESI)  $m/z$  calcd for  $C_{35}H_{26}O_3 + (M)^+$  494.18765, found 494.18829.

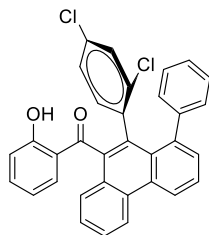

**(10-(2,4-dichlorophenyl)-1-phenylphenanthren-9-yl)(2-hydroxyphenyl)methanone (33):**

Yield 73%; 37.8 mg; white solid; mp 210–213°C; TLC (PET:EtOAc, 100:1 v/v):  $R_f$  = 0.3;  $^1H$  NMR (600 MHz,  $CDCl_3$ )  $\delta$ =11.90 (s, 1H), 11.77 (s, 1H), 9.01–8.85 (m, 2H), 7.79 (dd,  $J$  = 15.0, 7.2 Hz, 2H), 7.68 (dd,  $J$  = 39.0, 7.8 Hz, 1H), 7.63–7.56 (m, 1H), 7.44 (ddd,  $J$  = 22.2, 16.2, 6.6 Hz, 2H), 7.34–7.17 (m, 2H), 7.15–7.05 (m, 2H), 7.02–6.79 (m, 4H), 6.74 (d,  $J$  = 7.2 Hz, 1H), 6.66–6.55 (m, 1H), 6.51 (t,  $J$  = 7.8 Hz, 1H).  $^{13}C$  NMR (150 MHz,  $CDCl_3$ )  $\delta$ =204.7, 203.6, 162.2, 162.0, 142.5, 142.4, 142.1, 142.0, 137.0, 136.8, 136.1, 135.6, 135.6, 134.4, 133.8, 133.7, 133.2, 133.0, 132.0, 131.9, 131.6, 131.3, 130.3, 128.8, 128.4, 128.2, 128.1, 128.0, 127.9, 127.7, 127.6, 127.5, 126.8, 126.7, 126.5, 126.4, 126.3, 126.2, 125.8, 125.5, 123.5, 122.7, 122.5, 120.3, 119.1, 118.6, 118.3, 117.6. HRMS (ESI)  $m/z$  calcd for  $C_{33}H_{21}Cl_2O_2 + (M+H)^+$  519.09131, found 519.09136.

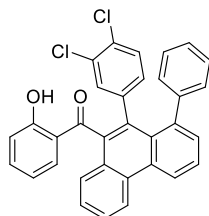

**(10-(3,4-dichlorophenyl)-1-phenylphenanthren-9-yl)(2-hydroxyphenyl)methanone (34):**

Yield 75%; 38.8 mg; white solid; mp 236–240°C; TLC (PET:EtOAc, 100:1 v/v):  $R_f$  = 0.3;  $^1H$  NMR (600 MHz,  $CDCl_3$ )  $\delta$ =11.84 (d,  $J$  = 5.4 Hz, 1H), 8.93–8.76 (m, 2H), 7.75 (dt,  $J$  = 11.4, 7.2 Hz, 2H), 7.65 (dd,  $J$  = 28.8, 7.8 Hz, 1H), 7.56 (dd,  $J$  = 16.2, 8.4 Hz, 1H), 7.47 (dd,  $J$  = 12.0, 7.2 Hz, 1H), 7.27 (dd,  $J$  = 14.4, 7.2 Hz, 1H), 7.13 (dd,  $J$  = 25.2, 17.4 Hz, 1H), 7.01 (dd,  $J$  = 21.6, 14.4 Hz, 2H), 6.97–6.72 (m, 6H), 6.65–6.56 (m, 1H), 6.53–6.45 (m, 1H), 6.39 (d,  $J$  = 8.4 Hz, 1H).  $^{13}C$  NMR (150 MHz,  $CDCl_3$ )  $\delta$ =204.6, 204.4, 162.4, 162.3, 143.0, 142.9, 142.4, 142.3, 138.9, 137.0, 136.8, 136.3, 136.3, 134.2, 133.0, 132.8, 132.6, 132.3, 132.3, 132.1, 132.0, 131.2, 130.7, 130.4, 129.7, 129.1, 129.1, 129.0, 128.7, 127.9, 127.9, 127.8, 127.8, 127.8, 127.5, 127.3, 127.3, 127.0, 126.9, 126.2, 126.1, 126.1, 126.0, 123.4, 122.3, 122.2, 120.7, 120.3, 118.8, 118.1, 118.0. HRMS (ESI)  $m/z$  calcd for  $C_{33}H_{21}Cl_2O_2 + (M+H)^+$  519.09131, found 519.09176.

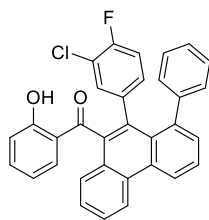

**(10-(3-chloro-4-fluorophenyl)-1-phenylphenanthren-9-yl)(2-hydroxyphenyl)methanone (35):**

Yield 77%; 38.6 mg; yellow solid; mp 233–237°C; TLC (PET:EtOAc, 100:1 v/v):  $R_f = 0.3$ ;  $^1\text{H NMR}$  (600 MHz,  $\text{CDCl}_3$ )  $\delta=11.87$  (d,  $J = 6.0$  Hz, 1H), 8.90 (dd,  $J = 15.6, 7.8$  Hz, 2H), 7.79 (dd,  $J = 15.6, 7.8$  Hz, 2H), 7.69 (dd,  $J = 30.6, 7.8$  Hz, 1H), 7.59 (dd,  $J = 15.6, 8.4$  Hz, 1H), 7.50 (dd,  $J = 11.4, 7.2$  Hz, 1H), 7.31 (dd,  $J = 13.2, 7.2$  Hz, 1H), 7.18 (t,  $J = 7.2$  Hz, 1H), 7.15–7.03 (m, 2H), 7.00 (d,  $J = 7.8$  Hz, 2H), 6.94–6.83 (m, 3H), 6.78 (t,  $J = 8.4$  Hz, 1H), 6.64–6.55 (m, 1H), 6.51 (dt,  $J = 11.4, 7.8$  Hz, 1H), 6.38 (dd,  $J = 35.4, 27.0$  Hz, 1H).  $^{13}\text{C NMR}$  (150 MHz,  $\text{CDCl}_3$ )  $\delta=204.7, 204.6, 162.4, 162.3, 157.0, 155.3, 143.1, 143.0, 142.4, 142.3, 136.9, 136.8, 136.5, 136.0, 134.5, 133.3, 133.1, 132.8, 132.6, 132.4, 132.3, 132.2, 132.0, 131.7, 131.7, 130.7, 130.4, 130.3, 130.0, 130.0, 129.0, 128.7, 128.3, 128.0, 127.8, 127.8, 127.7, 127.5, 127.4, 127.2, 126.9, 126.9, 126.8, 126.2, 126.1, 126.0, 123.4, 122.3, 122.2, 120.6, 120.2, 118.8, 118.1, 118.0, 115.1, 115.0, 114.8$ .  $^{19}\text{F NMR}$  (375 MHz,  $\text{CDCl}_3$ )  $\delta=117.92, 117.98$ . HRMS (ESI)  $m/z$  calcd for  $\text{C}_{33}\text{H}_{21}\text{ClFO}_2$  (M+H) $^+$  503.12086, found 503.12104.

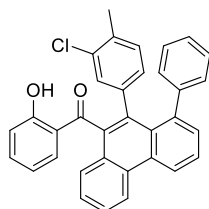

**(10-(3-chloro-4-methylphenyl)-1-phenylphenanthren-9-yl)(2-hydroxyphenyl)methanone (36):**

Yield 82%; 40.8 mg; white solid; mp 201–204°C; TLC (PET:EtOAc, 100:1 v/v):  $R_f = 0.3$ ;  $^1\text{H NMR}$  (600 MHz,  $\text{CDCl}_3$ )  $\delta=11.89$  (d,  $J = 6.0$  Hz, 1H), 8.83–8.68 (m, 2H), 7.68–7.55 (m, 3H), 7.50–7.42 (m, 1H), 7.38 (dd,  $J = 12.6, 7.2$  Hz, 1H), 7.20–7.13 (m, 1H), 7.03 (s, 1H), 6.98–6.78 (m, 4H), 6.80–6.67 (m, 3H), 6.59 (d,  $J = 7.8$  Hz, 1H), 6.45–6.28 (m, 3H), 1.94 (d,  $J = 14.4$  Hz, 3H).  $^{13}\text{C NMR}$  (150 MHz,  $\text{CDCl}_3$ )  $\delta=205.0, 204.8, 162.4, 162.3, 143.3, 143.1, 142.7, 142.6, 137.9, 136.7, 136.6, 136.1, 134.4, 134.2, 134.0, 134.1, 133.1, 133.0, 132.9, 132.8, 132.8, 132.4, 132.3, 132.2, 132.0, 131.7, 130.8, 130.4, 130.2, 130.0, 129.9, 129.6, 129.4, 129.2, 129.1, 129.0, 128.7, 128.6, 128.2, 128.2, 127.7, 127.7, 127.6, 127.6, 127.2, 127.1, 126.8, 126.8, 126.6, 126.1, 126.0, 125.7, 125.6, 123.5, 122.3, 122.2, 120.9, 120.5, 118.7, 117.9, 117.8, 19.5, 19.4$ . HRMS (ESI)  $m/z$  calcd for  $\text{C}_{34}\text{H}_{24}\text{ClO}_2$  (M+H) $^+$  499.14593, found 499.14608.

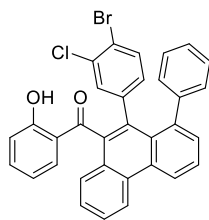

**(10-(4-bromo-3-chlorophenyl)-1-phenylphenanthren-9-yl)(2-hydroxyphenyl)methanone (37):**

Yield 85%; 47.7 mg; white solid; mp 241–243°C; TLC (PET:EtOAc, 100:1 v/v):  $R_f = 0.3$ ;  $^1\text{H NMR}$  (600 MHz,  $\text{CDCl}_3$ )  $\delta=11.85$  (d,  $J = 4.8$  Hz, 1H), 8.93–8.76 (m, 2H), 7.70 (ddd,  $J = 36.6, 22.2, 7.8$  Hz, 3H), 7.54 (dd,  $J = 16.2, 8.4$  Hz, 1H), 7.46 (dd,  $J = 11.4, 7.2$  Hz, 1H), 7.31–7.24 (m, 1H), 7.17–6.91 (m, 5H), 6.92–6.69 (m, 5H), 6.58 (s, 1H), 6.52–6.43 (m, 1H), 6.31 (d,  $J = 7.8$  Hz, 1H).  $^{13}\text{C NMR}$  (150 MHz,  $\text{CDCl}_3$ )  $\delta=204.6, 204.4, 162.4, 162.3, 143.0, 142.9, 142.4, 142.3, 139.6, 137.0, 136.9, 136.2, 136.2, 134.0, 132.8, 132.8, 132.6, 132.4, 132.3, 132.2, 132.0, 132.1, 131.3, 130.7, 130.4, 130.1, 130.0, 129.8, 129.2, 129.1, 128.6, 128.2, 128.0, 128.0, 127.9, 127.9, 127.8, 127.8, 127.5, 127.4, 127.3, 127.0, 126.9, 126.8, 126.2, 126.1, 126.0, 123.5, 122.3, 122.2, 120.8, 120.7, 120.3, 118.8, 118.2, 118.0$ . HRMS (ESI)  $m/z$  calcd for  $\text{C}_{33}\text{H}_{21}\text{BrClO}_2 + (\text{M}+\text{H})^+$  563.04080, found 563.04084.

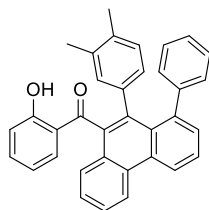

**(10-(3,4-dimethylphenyl)-1-phenylphenanthren-9-yl)(2-hydroxyphenyl)methanone (38):**

Yield 89%; 42.5 mg; white solid; mp 175–178°C; TLC (PET:EtOAc, 100:1 v/v):  $R_f = 0.3$ ;  $^1\text{H NMR}$  (600 MHz,  $\text{CDCl}_3$ )  $\delta=12.13$  (d,  $J = 2.4$  Hz, 1H), 8.95–8.82 (m, 2H), 7.82–7.68 (m, 3H), 7.55 (ddd,  $J = 22.2, 15.6, 7.8$  Hz, 2H), 7.26 (dd,  $J = 18.0, 7.8$  Hz, 1H), 7.12 (dd,  $J = 15.6, 7.2$  Hz, 1H), 7.07–6.92 (m, 4H), 6.93–6.77 (m, 3H), 6.68 (d,  $J = 7.8$  Hz, 1H), 6.50 (dt,  $J = 24.0, 7.8$  Hz, 1H), 6.41 (d,  $J = 6.0$  Hz, 1H), 6.34 (s, 1H), 2.04 (s, 1.5H), 1.97 (d,  $J = 9.6$  Hz, 3H), 1.78 (s, 1.5H).  $^{13}\text{C NMR}$  (150 MHz,  $\text{CDCl}_3$ )  $\delta=205.5, 205.4, 162.3, 143.6, 143.5, 143.1, 143.0, 136.5, 136.4, 136.3, 136.2, 136.2, 136.1, 136.0, 135.7, 135.6, 134.6, 134.5, 134.5, 134.3, 133.8, 133.3, 133.2, 132.7, 132.5, 132.4, 132.2, 131.9, 130.7, 130.4, 129.9, 129.8, 129.6, 129.5, 129.1, 128.5, 128.4, 128.3, 128.1, 127.6, 127.5, 127.3, 127.2, 127.1, 127.0, 126.6, 126.6, 126.4, 126.1, 126.0, 125.9, 125.2, 125.1, 123.5, 122.2, 122.1, 121.0, 120.9, 118.7, 118.4, 117.7, 117.6, 19.3, 19.1, 19.1$ . HRMS (ESI)  $m/z$  calcd for :  $\text{C}_{35}\text{H}_{27}\text{O}_2 + (\text{M}+\text{H})^+$  479.20056, found 479.20060.

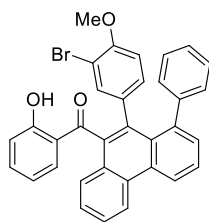

**(10-(3-bromo-4-methoxyphenyl)-1-phenylphenanthren-9-yl)(2-hydroxyphenyl)methanone (39):**

Yield 91%; 50.8 mg; white solid; mp 214–217°C; TLC (PET:EtOAc, 50:1 v/v):  $R_f = 0.3$ ;  $^1\text{H NMR}$  (600 MHz,  $\text{CDCl}_3$ )  $\delta = 11.93$  (d,  $J = 9.6$  Hz, 1H), 8.88–8.73 (m, 2H), 7.66 (ddd,  $J = 25.8, 16.2, 7.2$  Hz, 3H), 7.51 (dd,  $J = 13.8, 7.2$  Hz, 1H), 7.43 (dd,  $J = 12.0, 7.2$  Hz, 1H), 7.23–7.10 (m, 3H), 7.01 (dd,  $J = 11.4, 4.8$  Hz, 1H), 6.92 (dd,  $J = 36.0, 6.0$  Hz, 2H), 6.86–6.74 (m, 2H), 6.70 (dd,  $J = 32.4, 4.8$  Hz, 2H), 6.40 (ddd,  $J = 60.0, 29.4, 5.4$  Hz, 2H), 6.07 (d,  $J = 8.4$  Hz, 1H), 3.60 (d,  $J = 28.2$  Hz, 3H).  $^{13}\text{C NMR}$  (150 MHz,  $\text{CDCl}_3$ )  $\delta = 205.1, 204.8, 162.4, 162.3, 154.0, 154.0, 143.3, 143.2, 142.6, 142.6, 137.0, 136.8, 136.6, 136.3, 136.3, 136.0, 133.9, 133.0, 132.7, 132.4, 132.3, 132.2, 132.1, 132.1, 130.7, 130.3, 130.0, 129.9, 129.1, 128.9, 128.6, 128.1, 127.7, 127.7, 127.6, 127.6, 127.3, 127.0, 126.8, 126.8, 126.8, 126.1, 125.9, 125.8, 123.5, 123.4, 122.3, 122.2, 120.9, 120.3, 118.8, 118.7, 118.0, 117.8, 110.6, 110.6, 110.5, 110.5, 56.1, 56.1$ . HRMS (ESI)  $m/z$  calcd for  $\text{C}_{34}\text{H}_{23}\text{BrO}_3\text{Na}^+$  ( $\text{M}+\text{Na}$ ) $^+$  581.072279, found 581.072283.

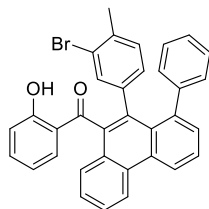

**(10-(3-bromo-4-methylphenyl)-1-phenylphenanthren-9-yl)(2-hydroxyphenyl)methanone (40):**

Yield 90%; 48.8 mg; white solid; mp 207–210°C; TLC (PET:EtOAc, 100:1 v/v):  $R_f = 0.3$ ;  $^1\text{H NMR}$  (600 MHz,  $\text{CDCl}_3$ )  $\delta = 11.93$  (s, 1H), 8.85–8.69 (m, 2H), 7.73–7.56 (m, 3H), 7.52–7.44 (m, 1H), 7.40 (dd,  $J = 13.8, 7.2$  Hz, 1H), 7.21–6.98 (m, 3H), 6.98–6.83 (m, 3H), 6.83–6.73 (m, 3H), 6.72–6.64 (m, 1H), 6.62 (d,  $J = 7.8$  Hz, 1H), 6.52–6.27 (m, 2H), 1.98 (d,  $J = 14.4$  Hz, 3H).  $^{13}\text{C NMR}$  (150 MHz,  $\text{CDCl}_3$ )  $\delta = 205.0, 204.8, 162.4, 162.3, 143.3, 143.1, 142.7, 142.6, 138.1, 138.1, 136.7, 136.6, 136.2, 136.1, 136.0, 135.8, 135.8, 134.9, 134.2, 134.1, 133.1, 132.8, 132.4, 132.3, 132.2, 132.1, 130.8, 130.4, 130.0, 130.0, 129.3, 129.3, 129.1, 129.1, 128.6, 128.2, 127.7, 127.7, 127.6, 127.3, 127.2, 127.1, 126.9, 126.7, 126.2, 126.0, 125.7, 125.6, 123.9, 123.7, 123.5, 122.3, 122.2, 121.0, 120.5, 118.8, 118.0, 117.8, 22.3, 22.3$ . HRMS (ESI)  $m/z$  calcd for  $\text{C}_{34}\text{H}_{24}\text{BrO}_2^+$  ( $\text{M}+\text{H}$ ) $^+$  543.09542, found 543.09564.

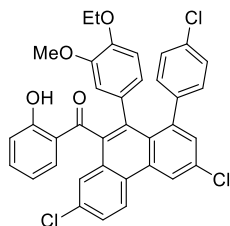

**(3,7-dichloro-1-(4-chlorophenyl)-10-(4-ethoxy-3-methoxyphenyl)phenanthren-9-yl)(2-hydroxyphenyl)methanone (41):**

Yield 71%; 44.4 mg; white solid; mp 226–229°C; TLC (PET:EtOAc, 20:1 v/v):  $R_f = 0.3$ ;  $^1\text{H NMR}$  (600 MHz,  $\text{CDCl}_3$ )  $\delta = 11.84$  (s, 1H), 11.77 (s, 1H), 8.81–8.54 (m, 2H), 7.74–7.49 (m, 2H), 7.38 (d,  $J = 4.8\text{ Hz}$ , 1H), 7.21 (dd,  $J = 16.2, 7.8\text{ Hz}$ , 1H), 7.04–6.82 (m, 3H), 6.83–6.68 (m, 3H), 6.69–6.60 (m, 1H), 6.53 (d,  $J = 8.4\text{ Hz}$ , 1H), 6.49–6.39 (m, 1H), 6.36 (d,  $J = 8.4\text{ Hz}$ , 1H), 6.10 (d,  $J = 8.4\text{ Hz}$ , 1H), 5.96 (d,  $J = 39.0\text{ Hz}$ , 1H), 3.97–3.65 (m, 3H), 3.35 (s, 2H), 1.41–1.22 (m, 3H).  $^{13}\text{C NMR}$  (150 MHz,  $\text{CDCl}_3$ )  $\delta = 204.0, 203.5, 162.4, 162.3, 147.9, 147.2, 147.1, 147.0, 143.2, 143.1, 140.2, 140.0, 136.7, 136.1, 135.9, 135.0, 134.3, 133.2, 133.0, 132.6, 132.4, 132.1, 132.0, 131.6, 131.3, 130.2, 130.0, 129.6, 129.5, 129.4, 128.1, 127.5, 127.4, 127.1, 127.0, 126.7, 125.2, 125.0, 124.8, 123.8, 121.9, 121.8, 120.1, 118.5, 118.2, 117.9, 115.5, 114.2, 112.3, 111.5, 64.4, 64.1, 55.7, 55.2, 14.4$ . HRMS (ESI)  $m/z$  calcd for  $\text{C}_{36}\text{H}_{25}\text{Cl}_3\text{O}_4$  ( $\text{M}$ ) $^+$  626.08129, found 626.08127.

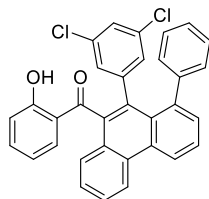

**(10-(3,5-dichlorophenyl)-1-phenylphenanthren-9-yl)(2-hydroxyphenyl)methanone (42):**

Yield 84%; 43.5 mg; white solid; mp 182–185°C; TLC (PET:EtOAc, 100:1 v/v):  $R_f = 0.3$ ;  $^1\text{H NMR}$  (600 MHz,  $\text{CDCl}_3$ )  $\delta = 11.99$  (s, 1H), 8.92 (dd,  $J = 12.0, 9.0\text{ Hz}$ , 2H), 7.80 (dt,  $J = 13.8, 7.2\text{ Hz}$ , 3H), 7.66–7.48 (m, 2H), 7.33 (t,  $J = 7.2\text{ Hz}$ , 1H), 7.19 (s, 2H), 7.09 (s, 3H), 6.92 (dd,  $J = 33.6, 7.8\text{ Hz}$ , 3H), 6.77 (s, 1H), 6.54 (d,  $J = 9.6\text{ Hz}$ , 2H).  $^{13}\text{C NMR}$  (150 MHz,  $\text{CDCl}_3$ )  $\delta = 204.3, 162.3, 142.6, 142.2, 141.7, 136.8, 136.4, 133.6, 133.2, 132.6, 132.5, 132.2, 132.0, 130.5, 130.4, 130.0, 129.2, 129.1, 128.0, 127.9, 127.4, 126.9, 126.5, 126.2, 123.4, 122.2, 120.4, 118.7, 118.0$ . HRMS (ESI)  $m/z$  calcd for  $\text{C}_{33}\text{H}_{21}\text{Cl}_2\text{O}_2$  ( $\text{M}+\text{H}$ ) $^+$  519.09131, found 519.09156.

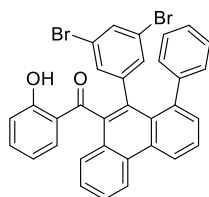

**(10-(3,5-dibromophenyl)-1-phenylphenanthren-9-yl)(2-hydroxyphenyl)methanone (43):**

Yield 90%; 54.5 mg; white solid; mp 190–193°C; TLC (PET:EtOAc, 100:1 v/v):  $R_f = 0.3$ ;  $^1\text{H}$  NMR (600 MHz,  $\text{CDCl}_3$ )  $\delta=11.98$  (s, 1H), 8.98–8.79 (m, 2H), 7.80 (dd,  $J = 18.6, 7.8$  Hz, 3H), 7.66–7.50 (m, 2H), 7.32 (d,  $J = 7.2$  Hz, 1H), 7.27 (s, 1H), 7.20 (d,  $J = 16.8$  Hz, 2H), 7.09 (d,  $J = 21.6$  Hz, 3H), 6.95 (d,  $J = 8.4$  Hz, 1H), 6.88 (s, 2H), 6.74 (s, 1H), 6.53 (d,  $J = 6.6$  Hz, 1H).  $^{13}\text{C}$  NMR (150 MHz,  $\text{CDCl}_3$ )  $\delta=204.4, 162.5, 142.7, 142.3, 137.0, 136.7, 133.7, 132.6, 132.6, 132.4, 132.2, 132.1, 130.7, 130.2, 129.3, 128.2, 128.0, 127.6, 127.4, 127.1, 126.7, 126.3, 123.6, 122.4, 121.8, 121.5, 120.5, 118.9, 118.2$ . HRMS (ESI)  $m/z$  calcd for  $\text{C}_{33}\text{H}_{21}\text{Br}_2\text{O}_2^+$  ( $\text{M}+\text{H}$ ) $^+$  608.98852, found 608.98829.

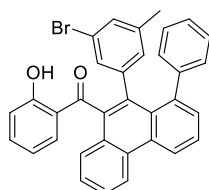

**(10-(3-bromo-5-methylphenyl)-1-phenylphenanthren-9-yl)(2-hydroxyphenyl)methanone (44):**

Yield 92%; 49.8 mg; white solid; mp 182–185°C; TLC (PET:EtOAc, 100:1 v/v):  $R_f = 0.3$ ;  $^1\text{H}$  NMR (600 MHz,  $\text{CDCl}_3$ )  $\delta=12.12$  (s, 1H), 8.91 (t,  $J = 8.4$  Hz, 2H), 7.87 (dd,  $J = 13.2, 8.4$  Hz, 1H), 7.77 (dd,  $J = 16.8, 8.4$  Hz, 2H), 7.61 (dd,  $J = 12.6, 6.6$  Hz, 1H), 7.56 (d,  $J = 7.2$  Hz, 1H), 7.30 (dd,  $J = 16.8, 8.4$  Hz, 1H), 7.26–7.00 (m, 5H), 6.98–6.87 (m, 3H), 6.75 (d,  $J = 12.0$  Hz, 1H), 6.66 (s, 1H), 6.57–6.48 (m, 1H), 6.40 (s, 1H), 2.14 (s, 1.7H), 1.87 (s, 1.3H).  $^{13}\text{C}$  NMR (150 MHz,  $\text{CDCl}_3$ )  $\delta=205.0, 204.9, 204.8, 162.5, 162.4, 143.1, 143.1, 142.7, 142.6, 140.8, 140.6, 138.5, 138.0, 136.8, 136.6, 136.3, 136.3, 134.3, 133.0, 132.9, 132.5, 132.4, 132.3, 132.2, 132.1, 131.7, 131.0, 130.8, 130.7, 130.6, 130.2, 130.1, 130.1, 129.3, 129.1, 128.5, 128.5, 128.3, 127.9, 127.5, 127.0, 127.0, 126.5, 126.3, 126.2, 126.2, 123.6, 122.4, 122.3, 121.4, 121.1, 121.0, 120.6, 118.8, 118.6, 118.0, 117.9, 20.8, 20.6$ . HRMS (ESI)  $m/z$  calcd for  $\text{C}_{34}\text{H}_{24}\text{BrO}_2^+$  ( $\text{M}+\text{H}$ ) $^+$  543.09542, found 543.09544.

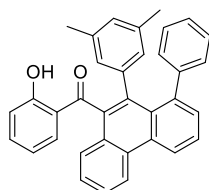

**(10-(3,5-dimethylphenyl)-1-phenylphenanthren-9-yl)(2-hydroxyphenyl)methanone (45):**

Yield 89%; 42.5 mg; white solid; mp 184–188°C; TLC (PET:EtOAc, 100:1 v/v):  $R_f = 0.3$ ;  $^1\text{H}$  NMR (600 MHz,  $\text{CDCl}_3$ )  $\delta=12.15$  (s, 1H), 8.98–8.88 (m, 2H), 7.87 (d,  $J = 8.4$  Hz, 1H), 7.77 (dt,  $J = 15.0, 7.8$  Hz, 2H), 7.63–7.55 (m, 2H), 7.28 (t,  $J = 7.8$  Hz, 1H), 7.21–7.09 (m, 2H), 7.06–6.97 (m, 3H), 6.97–6.90 (m, 2H), 6.84 (s, 1H), 6.51 (t,  $J = 7.8$  Hz, 1H), 6.39 (s, 1H), 6.28 (s, 1H), 2.17 (s, 3H), 1.90 (s, 3H).  $^{13}\text{C}$  NMR (150 MHz,  $\text{CDCl}_3$ )  $\delta=205.3, 162.1, 143.2, 142.9, 138.5, 136.1, 135.7, 133.0, 132.4, 131.9, 130.6, 130.2, 129.8, 128.9, 128.8, 128.3, 127.9, 127.5, 127.2, 126.7,$



126.6, 126.3, 125.9, 125.6, 123.4, 122.0, 120.8, 118.2, 117.5, 20.9, 20.6. HRMS (ESI)  $m/z$  calcd for  $C_{35}H_{27}O_2+$  ( $M+H$ )<sup>+</sup> 479.20056, found 479.20082.

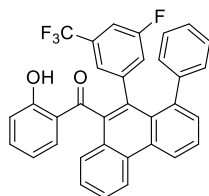

**(10-(3-fluoro-5-(trifluoromethyl)phenyl)-1-phenylphenanthren-9-yl)(2-hydroxyphenyl)methanone (46):**

Yield 74%; 39.6 mg; white solid; mp 194–197°C; TLC (PET:EtOAc, 100:1 v/v):  $R_f$  = 0.3; <sup>1</sup>H NMR (600 MHz, CDCl<sub>3</sub>)  $\delta$ =11.73 (d,  $J$  = 8.4 Hz, 1H), 8.83 (dd,  $J$  = 15.6, 8.4 Hz, 2H), 7.83–7.59 (m, 3H), 7.53 (t,  $J$  = 6.6 Hz, 1H), 7.45 (t,  $J$  = 7.8 Hz, 1H), 7.20 (dd,  $J$  = 15.6, 7.8 Hz, 2H), 7.05 (dd,  $J$  = 18.6, 7.2 Hz, 1H), 7.00–6.85 (m, 4H), 6.86–6.68 (m, 3H), 6.67–6.58 (m, 2H), 6.41 (dd,  $J$  = 18.6, 10.2 Hz, 2H). <sup>13</sup>C NMR (150 MHz, CDCl<sub>3</sub>)  $\delta$ =204.4, 204.4, 162.4, 162.3, 161.8, 161.5, 160.1, 159.8, 142.8, 142.5, 142.4, 142.2, 142.1, 137.0, 137.0, 136.8, 136.7, 132.8, 132.6, 132.5, 132.4, 132.4, 132.2, 132.2, 130.8, 130.7, 130.2, 129.4, 129.0, 128.1, 128.0, 128.0, 127.9, 127.7, 127.1, 127.0, 126.6, 126.6, 126.2, 125.0, 123.8, 123.5, 122.5, 122.4, 121.1, 120.9, 120.4, 118.8, 118.8, 118.1, 118.0, 110.8. HRMS (ESI)  $m/z$  calcd for  $C_{34}H_{21}F_4O_2+$  ( $M+H$ )<sup>+</sup> 537.14722, found 537.14720.

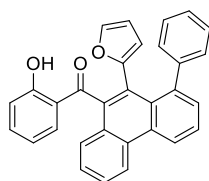

**(10-(furan-2-yl)-1-phenylphenanthren-9-yl)(2-hydroxyphenyl)methanone (47):**

Yield 91%; 40.0 mg; yellow solid; mp 195–199°C; TLC (PET:EtOAc, 100:1 v/v):  $R_f$  = 0.3; <sup>1</sup>H NMR (600 MHz, CDCl<sub>3</sub>)  $\delta$ =12.11 (s, 1H), 8.88 (d,  $J$  = 7.2 Hz, 2H), 7.89–7.72 (m, 3H), 7.61 (dd,  $J$  = 18.0, 7.2 Hz, 2H), 7.43 (s, 1H), 7.35–7.28 (m, 1H), 7.22 (s, 1H), 7.14–6.99 (m, 3H), 6.93 (d,  $J$  = 8.4 Hz, 1H), 6.79 (d,  $J$  = 11.4 Hz, 2H), 6.49 (t,  $J$  = 7.2 Hz, 1H), 5.95 (s, 1H), 5.72 (s, 1H). <sup>13</sup>C NMR (150 MHz, CDCl<sub>3</sub>)  $\delta$ =204.4, 162.4, 149.3, 142.4, 142.2, 142.0, 136.8, 136.5, 132.5, 132.4, 132.0, 130.6, 130.3, 128.1, 128.0, 127.9, 127.9, 127.7, 127.5, 127.1, 126.7, 124.9, 123.5, 122.0, 120.3, 118.6, 117.7, 113.7, 110.8. HRMS (ESI)  $m/z$  calcd for  $C_{31}H_{21}O_3+$  ( $M+H$ )<sup>+</sup> 441.14852, found 441.14867.

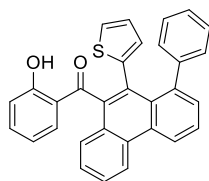

**(2-hydroxyphenyl)(1-phenyl-10-(thiophen-2-yl)phenanthren-9-yl)methanone (48):**

Yield 74%; 33.7 mg; yellow solid; mp 223–226°C; TLC (PET:EtOAc, 100:1 v/v):  $R_f = 0.3$ ;  $^1\text{H NMR}$  (600 MHz,  $\text{CDCl}_3$ )  $\delta=12.00$  (s, 1H), 8.86 (d,  $J = 7.8$  Hz, 2H), 7.76 (ddd,  $J = 23.4, 15.6, 7.8$  Hz, 3H), 7.61–7.50 (m, 2H), 7.42 (dd,  $J = 23.4, 7.8$  Hz, 1H), 7.35–7.24 (m, 2H), 7.11 (s, 2H), 7.07–6.95 (m, 3H), 6.83 (d,  $J = 57.0$  Hz, 3H), 6.51 (dd,  $J = 24.6, 17.4$  Hz, 1H).  $^{13}\text{C NMR}$  (150 MHz,  $\text{CDCl}_3$ )  $\delta=204.5, 162.1, 142.6, 141.8, 141.2, 137.2, 136.4, 135.8, 133.0, 132.2, 132.0, 131.6, 131.0, 130.0, 129.5, 129.0, 128.0, 127.8, 127.7, 127.5, 127.1, 126.8, 126.5, 126.0, 125.7, 123.3, 121.6, 118.4, 117.5$ . HRMS (ESI)  $m/z$  calcd for  $\text{C}_{31}\text{H}_{21}\text{O}_2\text{S}^+$  ( $\text{M}+\text{H}$ ) $^+$  457.12568, found 457.12701.

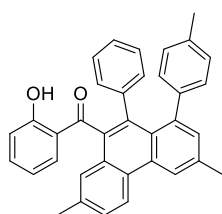

**(3,7-dimethyl-10-phenyl-1-(p-tolyl)phenanthren-9-yl)(2-hydroxyphenyl)methanone (49):**

Yield 75%; 36.9 mg; yellow solid; mp 270–273°C; TLC (PET:EtOAc, 100:1 v/v):  $R_f = 0.3$ ;  $^1\text{H NMR}$  (600 MHz,  $\text{CDCl}_3$ )  $\delta=11.92$  (s, 1H), 8.71 (d,  $J = 8.4$  Hz, 1H), 8.60 (s, 1H), 7.50 (d,  $J = 8.4$  Hz, 1H), 7.41 (s, 1H), 7.18 (d,  $J = 7.2$  Hz, 1H), 7.03 (d,  $J = 7.2$  Hz, 1H), 6.90 (d,  $J = 7.2$  Hz, 1H), 6.77 (ddd,  $J = 38.4, 15.6, 7.2$  Hz, 5H), 6.68 (s, 1H), 6.63 (d,  $J = 10.2$  Hz, 2H), 6.49 (s, 2H), 6.41 (t,  $J = 7.2$  Hz, 1H), 2.64 (s, 3H), 2.44 (s, 3H), 2.13 (s, 3H).  $^{13}\text{C NMR}$  (150 MHz,  $\text{CDCl}_3$ )  $\delta=205.7, 162.0, 142.6, 140.4, 139.2, 137.3, 136.3, 136.2, 135.9, 135.1, 134.8, 133.2, 133.1, 132.6, 132.0, 130.8, 128.9, 128.7, 127.9, 127.5, 126.7, 126.5, 126.0, 125.2, 123.2, 121.5, 120.7, 118.4, 117.5, 21.7, 21.6, 20.9$ . HRMS (ESI)  $m/z$  calcd for  $\text{C}_{36}\text{H}_{29}\text{O}_2^+$  ( $\text{M}+\text{H}$ ) $^+$  493.21621, found 493.21649.

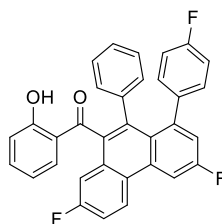

**(3,7-difluoro-1-(4-fluorophenyl)-10-phenylphenanthren-9-yl)(2-hydroxyphenyl)methanone (50):**

Yield 93%; 46.9 mg; white solid; mp 213–216°C; TLC (PET:EtOAc, 100:1 v/v):  $R_f = 0.3$ ;  $^1\text{H NMR}$  (400 MHz,  $\text{CDCl}_3$ )  $\delta=11.77$  (s, 1H), 8.67 (dd,  $J = 9.2, 5.2$  Hz, 1H), 8.39 (dd,  $J = 10.4, 2.0$  Hz, 1H), 7.43 (dd,  $J = 12.0, 5.2$  Hz, 1H), 7.31 (dd,  $J = 10.0, 2.0$  Hz, 1H), 7.24–7.17 (m, 2H), 7.03 (d,  $J = 7.6$  Hz, 1H), 6.99–6.93 (m, 1H), 6.89 (t,  $J = 7.6$  Hz, 1H), 6.80–6.74 (m, 3H), 6.71 (d,  $J = 5.6$  Hz, 1H), 6.68–6.58 (m, 2H),

6.53 (dd,  $J = 15.6, 4.8$  Hz, 2H), 6.45 (t,  $J = 7.6$  Hz, 1H).  $^{13}\text{C}$  NMR (100 MHz,  $\text{CDCl}_3$ )  $\delta = 204.1, 163.3, 162.5, 162.3, 162.1, 160.8, 160.0, 159.6, 144.7, 144.7, 138.4, 138.0, 136.7, 134.9, 134.2, 134.1, 132.7, 132.1, 132.0, 131.7, 130.6, 130.5, 130.4, 130.0, 129.9, 127.2, 127.0, 126.9, 126.1, 126.0, 125.9, 125.4, 120.5, 120.2, 118.5, 117.8, 116.7, 116.5, 114.5, 114.3, 114.1, 113.9, 110.7, 110.5, 107.3, 107.1$ .  $^{19}\text{F}$  NMR (375 MHz,  $\text{CDCl}_3$ )  $\delta = 111.16, 112.64, 116.04$ . HRMS (ESI)  $m/z$  calcd for  $\text{C}_{33}\text{H}_{20}\text{F}_3\text{O}_2 + (\text{M}+\text{H})^+$  505.14099, found 505.14107.

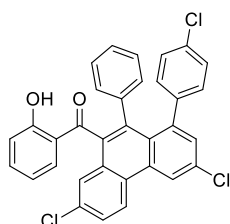

**(3,7-dichloro-1-(4-chlorophenyl)-10-phenylphenanthren-9-yl)(2-hydroxyphenyl)methanone (51):**

Yield 94%; 51.8 mg; white solid; mp 275–278°C; TLC (PET:EtOAc, 100:1 v/v):  $R_f = 0.3$ ;  $^1\text{H}$  NMR (400 MHz,  $\text{CD}_2\text{Cl}_2$ )  $\delta = 11.71$  (s, 1H), 8.82 (s, 1H), 8.73 (d,  $J = 8.9$  Hz, 1H), 7.72 (d,  $J = 9.0$  Hz, 1H), 7.64 (s, 1H), 7.44 (s, 1H), 7.27 (t,  $J = 7.8$  Hz, 1H), 7.02 (d,  $J = 7.1$  Hz, 1H), 6.98–6.90 (m, 3H), 6.83 (t,  $J = 7.5$  Hz, 2H), 6.78 (d,  $J = 8.2$  Hz, 2H), 6.71 (d,  $J = 8.1$  Hz, 1H), 6.62 (t,  $J = 7.5$  Hz, 1H), 6.50 (dd,  $J = 14.6, 7.4$  Hz, 2H).  $^{13}\text{C}$  NMR (100 MHz,  $\text{CD}_2\text{Cl}_2$ )  $\delta = 204.2, 162.8, 143.9, 140.7, 138.6, 137.2, 137.0, 135.8, 134.7, 133.8, 133.5, 133.2, 132.7, 132.4, 132.4, 131.3, 130.8, 130.1, 128.7, 128.1, 127.9, 127.7, 127.3, 125.7, 125.3, 122.3, 120.7, 119.1, 118.1$ . HRMS (ESI)  $m/z$  calcd for  $\text{C}_{33}\text{H}_{20}\text{Cl}_3\text{O}_2 + (\text{M}+\text{H})^+$  553.05234, found 553.05238.

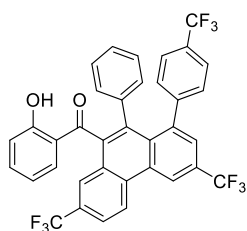

**(2-hydroxyphenyl)(10-phenyl-3,7-bis(trifluoromethyl)-1-(4-(trifluoromethyl)phenyl)phenanthren-9-yl)methanone (52):**

Yield 91%; 59.5 mg; yellow solid; mp 245–249°C; TLC (PET:EtOAc, 100:1 v/v):  $R_f = 0.3$ ;  $^1\text{H}$  NMR (600 MHz,  $\text{CDCl}_3$ )  $\delta = 11.63$  (d,  $J = 1.8$  Hz, 1H), 9.19 (s, 1H), 9.02 (d,  $J = 8.4$  Hz, 1H), 8.04–7.96 (m, 2H), 7.71 (s, 1H), 7.26 (d,  $J = 5.4$  Hz, 2H), 7.19–7.12 (m, 2H), 7.01 (d,  $J = 7.2$  Hz, 1H), 6.88 (d,  $J = 6.6$  Hz, 2H), 6.79 (dd,  $J = 13.8, 7.2$  Hz, 2H), 6.71 (d,  $J = 7.8$  Hz, 1H), 6.60 (t,  $J = 7.2$  Hz, 1H), 6.48 (dd,  $J = 15.6, 7.2$  Hz, 2H).  $^{13}\text{C}$  NMR (150 MHz,  $\text{CDCl}_3$ )  $\delta = 203.0, 162.3, 145.2, 142.7, 138.1, 137.3, 137.1, 136.4, 132.4, 131.9, 131.6, 131.6, 131.5, 130.9, 130.7, 130.5, 130.3, 129.3, 129.0, 128.8, 128.7, 128.5, 128.2, 128.1, 127.5, 127.3, 124.6, 124.2, 124.1, 123.4, 120.4, 120.1, 118.7, 118.1$ .  $^{19}\text{F}$  NMR (375 MHz,  $\text{CDCl}_3$ )  $\delta = 62.18, 62.30, 63.03$ . HRMS (ESI)  $m/z$  calcd for  $\text{C}_{36}\text{H}_{20}\text{F}_9\text{O}_2 + (\text{M}+\text{H})^+$  655.13141, found 655.13131.

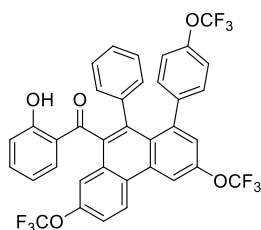

**(2-hydroxyphenyl)(10-phenyl-3,7-bis(trifluoromethoxy)-1-(4-(trifluoromethoxy)phenyl)phenanthren-9-yl)methanone (53):**

Yield 91%; 63.8 mg; white solid; mp 163–166°C; TLC (PET:EtOAc, 100:1 v/v):  $R_f = 0.3$ ;  $^1\text{H NMR}$  (600 MHz,  $\text{CDCl}_3$ )  $\delta=11.78$  (s, 1H), 8.85 (d,  $J = 9.0$  Hz, 1H), 8.71 (s, 1H), 7.68 (d,  $J = 9.0$  Hz, 1H), 7.58 (s, 1H), 7.42 (s, 1H), 7.29 (t,  $J = 7.8$  Hz, 1H), 7.11 (t,  $J = 7.2$  Hz, 2H), 6.95 (t,  $J = 7.2$  Hz, 1H), 6.90 (s, 1H), 6.85 (d,  $J = 4.2$  Hz, 4H), 6.79 (d,  $J = 7.8$  Hz, 1H), 6.68 (t,  $J = 7.2$  Hz, 1H), 6.60 (d,  $J = 7.2$  Hz, 1H), 6.53 (t,  $J = 7.2$  Hz, 1H).  $^{13}\text{C NMR}$  (150 MHz,  $\text{CDCl}_3$ )  $\delta=203.5$ , 162.4, 148.8, 147.6, 147.6, 144.0, 140.5, 137.9, 136.9, 136.6, 136.1, 133.3, 132.6, 131.9, 131.8, 130.6, 130.3, 129.6, 127.7, 127.5, 127.4, 127.2, 127.2, 125.7, 124.9, 121.2, 120.8, 120.4, 120.1, 119.9, 119.8, 119.5, 118.7, 117.9, 117.2, 113.8.  $^{19}\text{F NMR}$  (375 MHz,  $\text{CDCl}_3$ )  $\delta=57.33$ , 57.62, 57.73. HRMS (ESI)  $m/z$  calcd for  $\text{C}_{36}\text{H}_{20}\text{F}_9\text{O}_5$  (M+H) $^+$  703.11615, found 703.11598.

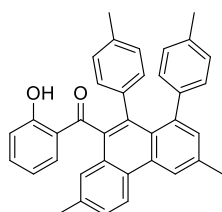

**(10-(4-ethoxyphenyl)-1-(4-ethoxyphenyl)phenanthren-9-yl)methanone (54):**

Yield 66%; 33.4 mg; white solid; mp 248–251°C; TLC (PET:EtOAc, 100:1 v/v):  $R_f = 0.3$ ;  $^1\text{H NMR}$  (400 MHz,  $\text{CDCl}_3$ )  $\delta=11.98$  (s, 1H), 8.72 (d,  $J = 8.4$  Hz, 1H), 8.61 (s, 1H), 7.51 (d,  $J = 8.8$  Hz, 1H), 7.39 (s, 1H), 7.25 (d,  $J = 11.6$  Hz, 2H), 6.88 (dd,  $J = 12.8, 8.0$  Hz, 3H), 6.81–6.73 (m, 2H), 6.62 (s, 3H), 6.45 (s, 1H), 6.35 (s, 1H), 6.31 (s, 1H), 2.65 (s, 3H), 2.45 (s, 3H), 2.18 (s, 3H), 2.02 (s, 3H).  $^{13}\text{C NMR}$  (100 MHz,  $\text{CDCl}_3$ )  $\delta=205.8$ , 162.1, 142.7, 140.6, 137.3, 136.2, 136.1, 136.0, 135.7, 134.9, 134.6, 133.3, 133.2, 132.6, 132.0, 130.8, 130.6, 128.9, 128.8, 128.6, 127.6, 127.4, 126.7, 125.2, 123.2, 121.6, 120.9, 118.4, 117.5, 21.8, 21.6, 20.9. HRMS (ESI)  $m/z$  calcd for  $\text{C}_{37}\text{H}_{30}\text{O}_2$  (M) $^+$  506.22401, found 506.22454.

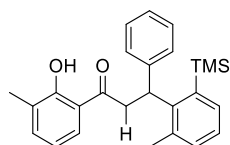

**1-(2-hydroxy-3-methylphenyl)-3-(2-methyl-6-(trimethylsilyl)phenyl)-3-phenylpropan-1-one (55):**

Yield 94%; 37.8 mg; white solid; mp 159–161°C; TLC (PET:EtOAc, 100:1 v/v):  $R_f = 0.3$ ;  $^1\text{H NMR}$  (600 MHz,  $\text{CDCl}_3$ )  $\delta=12.64$  (s, 1H), 7.72 (d,  $J = 7.8$  Hz, 1H), 7.46 (d,  $J = 7.2$  Hz, 1H), 7.31 (d,  $J = 7.2$  Hz, 1H), 7.17 (dd,  $J = 17.4, 7.8$  Hz, 3H), 7.10 (dd,  $J = 12.6, 6.6$  Hz, 2H), 6.96 (d,  $J = 7.8$  Hz, 2H), 6.78 (t,  $J = 7.8$  Hz, 1H), 5.42 (d,  $J = 10.2$  Hz, 1H), 4.40 (dd,  $J = 18.6, 10.2$  Hz, 1H), 3.37 (d,  $J = 18.6$  Hz, 1H), 2.26 (s, 3H), 1.92 (s, 3H), 0.36 (s, 9H).  $^{13}\text{C NMR}$  (150 MHz,  $\text{CDCl}_3$ )  $\delta=204.2, 161.3, 148.8, 143.0, 140.6, 137.4, 137.1, 134.0, 132.9, 128.3, 128.0, 127.3, 127.2, 126.6, 125.9, 118.7, 118.5, 43.4, 42.0, 21.6, 15.8, 0.8$ . HRMS (ESI)  $m/z$  calcd for  $\text{C}_{26}\text{H}_{30}\text{O}_2\text{SiNa}^+$  ( $\text{M}+\text{Na}$ ) $^+$  425.19073, found 425.19081.

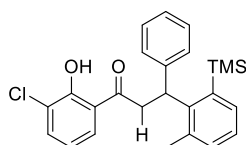

**1-(3-chloro-2-hydroxyphenyl)-3-(2-methyl-6-(trimethylsilyl)phenyl)-3-phenylpropan-1-one (56):**

Yield 66%; 27.8 mg; yellow solid; mp 195–198°C; TLC (PET:EtOAc, 100:1 v/v):  $R_f = 0.3$ ;  $^1\text{H NMR}$  (600 MHz,  $\text{CDCl}_3$ )  $\delta=12.90$  (s, 1H), 7.86 (d,  $J = 7.8$  Hz, 1H), 7.63 (d,  $J = 7.8$  Hz, 1H), 7.49 (d,  $J = 7.2$  Hz, 1H), 7.24 (t,  $J = 7.2$  Hz, 3H), 7.18 (t,  $J = 8.4$  Hz, 2H), 6.99–6.89 (m, 3H), 5.41 (d,  $J = 10.2$  Hz, 1H), 4.41 (dd,  $J = 19.2, 10.2$  Hz, 1H), 3.44 (d,  $J = 19.2$  Hz, 1H), 1.95 (s, 3H), 0.38 (s, 9H).  $^{13}\text{C NMR}$  (150 MHz,  $\text{CDCl}_3$ )  $\delta=203.9, 158.3, 148.3, 142.5, 140.6, 136.9, 136.5, 133.9, 132.8, 128.3, 128.0, 127.1, 126.5, 125.8, 123.3, 120.2, 119.2, 43.2, 42.0, 21.4, 0.6$ . HRMS (ESI)  $m/z$  calcd for  $\text{C}_{25}\text{H}_{27}\text{ClO}_2\text{SiNa}^+$  ( $\text{M}+\text{Na}$ ) $^+$  445.13611, found 445.13620.

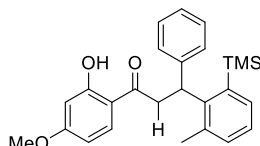

**1-(2-hydroxy-4-methoxyphenyl)-3-(2-methyl-6-(trimethylsilyl)phenyl)-3-phenylpropan-1-one (57):**

Yield 96%; 40.1 mg; white solid; mp 206–209°C; TLC (PET:EtOAc, 50:1 v/v):  $R_f = 0.3$ ;  $^1\text{H NMR}$  (600 MHz,  $\text{CDCl}_3$ )  $\delta=12.81$  (s, 1H), 7.77 (d,  $J = 9.6$  Hz, 1H), 7.45 (d,  $J = 7.2$  Hz, 1H), 7.18 (td,  $J = 7.8, 3.6$  Hz, 3H), 7.14–7.09 (m, 2H), 6.96 (d,  $J = 7.8$  Hz, 2H), 6.48–6.42 (m, 2H), 5.39 (d,  $J = 10.2$  Hz, 1H), 4.30 (dd,  $J = 18.6, 10.2$  Hz, 1H), 3.78 (s, 3H), 3.29 (d,  $J = 18.6$  Hz, 1H), 1.92 (s, 3H), 0.35 (s, 9H).  $^{13}\text{C NMR}$  (150 MHz,  $\text{CDCl}_3$ )  $\delta=201.9, 166.2, 165.6, 148.8, 143.1, 140.6, 137.0, 133.9, 132.8, 131.2, 128.2, 127.2, 126.5, 125.7, 113.5, 107.9, 101.2, 55.6, 43.3, 41.4, 21.5, 0.7$ . HRMS (ESI)  $m/z$  calcd for  $\text{C}_{26}\text{H}_{31}\text{O}_3\text{Si}^+$  ( $\text{M}+\text{H}$ ) $^+$  419.20370, found 419.20380.

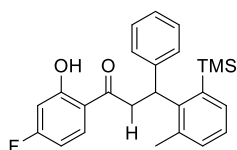

**1-(4-fluoro-2-hydroxyphenyl)-3-(2-methyl-6-(trimethylsilyl)phenyl)-3-phenylpropan-1-one (58):**

Yield 87%; 35.3 mg; yellow solid; mp 137–140°C; TLC (PET:EtOAc, 100:1 v/v):  $R_f = 0.3$ ;  $^1\text{H NMR}$  (600 MHz,  $\text{CDCl}_3$ )  $\delta=12.66$  (s, 1H), 7.88–7.82 (m, 1H), 7.47 (d,  $J = 7.2$  Hz, 1H), 7.17 (dt,  $J = 15.0, 7.8$  Hz, 3H), 7.13–7.07 (m, 2H), 6.97 (d,  $J = 7.8$  Hz, 2H), 6.63 (d,  $J = 10.2$  Hz, 1H), 6.56 (t,  $J = 7.2$  Hz, 1H), 5.43 (d,  $J = 10.2$  Hz, 1H), 4.33 (dd,  $J = 18.6, 10.2$  Hz, 1H), 3.36 (d,  $J = 18.6$  Hz, 1H), 1.94 (s, 3H), 0.36 (s, 9H).  $^{13}\text{C NMR}$  (150 MHz,  $\text{CDCl}_3$ )  $\delta=203.0, 168.5, 166.8, 165.5, 165.4, 148.6, 143.0, 140.7, 137.1, 134.1, 133.0, 132.2, 132.1, 128.5, 127.3, 126.8, 126.0, 116.7, 107.6, 107.5, 105.5, 105.4, 43.4, 42.1, 21.7, 0.9$ .  $^{19}\text{F NMR}$  (375 MHz,  $\text{CDCl}_3$ )  $\delta=98.92$ . HRMS (ESI)  $m/z$  calcd for  $\text{C}_{25}\text{H}_{27}\text{FO}_2\text{SiNa}^+$  ( $\text{M}+\text{Na}$ ) $^+$  429.165656, found 429.165763.

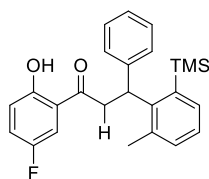

**1-(5-fluoro-2-hydroxyphenyl)-3-(2-methyl-6-(trimethylsilyl)phenyl)-3-phenylpropan-1-one (59):**

Yield 65%; 26.4 mg; yellow solid; mp 149–152°C; TLC (PET:EtOAc, 100:1 v/v):  $R_f = 0.3$ ;  $^1\text{H NMR}$  (600 MHz,  $\text{CDCl}_3$ )  $\delta=12.05$  (s, 1H), 7.55 (d,  $J = 8.4$  Hz, 1H), 7.48 (d,  $J = 7.2$  Hz, 1H), 7.16 (ddd,  $J = 22.8, 13.8, 6.6$  Hz, 6H), 6.96 (d,  $J = 7.2$  Hz, 3H), 5.41 (d,  $J = 10.2$  Hz, 1H), 4.33 (dd,  $J = 18.6, 10.2$  Hz, 1H), 3.36 (d,  $J = 18.6$  Hz, 1H), 1.94 (s, 3H), 0.37 (s, 9H).  $^{13}\text{C NMR}$  (150 MHz,  $\text{CDCl}_3$ )  $\delta=203.3, 159.0, 155.7, 154.1, 148.4, 142.7, 140.6, 137.0, 134.0, 132.9, 128.4, 127.2, 126.7, 125.9, 124.4, 124.2, 120.3, 118.8, 114.7, 114.5, 43.3, 42.1, 21.6, 0.8$ .  $^{19}\text{F NMR}$  (375 MHz,  $\text{CDCl}_3$ )  $\delta=123.47$ . HRMS (ESI)  $m/z$  calcd for  $\text{C}_{25}\text{H}_{27}\text{FO}_2\text{SiNa}^+$  ( $\text{M}+\text{Na}$ ) $^+$  429.165656, found 429.165755.

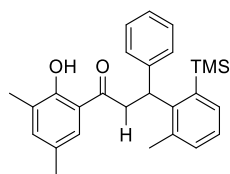

**1-(2-hydroxy-3,5-dimethylphenyl)-3-(2-methyl-6-(trimethylsilyl)phenyl)-3-phenylpropan-1-one (60):**

Yield 89%; 37.0 mg; yellow oil; TLC (PET:EtOAc, 100:1 v/v):  $R_f = 0.3$ ;  $^1\text{H NMR}$  (600 MHz,  $\text{CDCl}_3$ )  $\delta=12.34$  (s, 1H), 7.38 (s, 1H), 7.31 (d,  $J = 7.2$  Hz, 1H), 7.01 (t,  $J = 7.8$  Hz, 4H), 6.98–6.94 (m, 2H), 6.82 (d,  $J = 7.8$  Hz, 2H), 5.26 (d,  $J = 10.2$  Hz, 1H), 4.25 (dd,  $J = 18.6, 10.2$  Hz, 1H), 3.24 (d,  $J = 18.6$  Hz, 1H), 2.10 (d,  $J = 11.4$  Hz, 6H), 1.78 (s, 3H), 0.21 (s, 9H).  $^{13}\text{C NMR}$  (150 MHz,  $\text{CDCl}_3$ )  $\delta=204.0, 159.3, 148.9, 143.1, 140.6, 138.7, 137.1, 134.0, 132.9, 128.3, 127.7, 127.4, 127.4, 126.9, 126.6$ .

125.8, 118.4, 43.5, 42.0, 21.7, 20.8, 15.8, 0.8. HRMS (ESI)  $m/z$  calcd for  $C_{27}H_{33}O_2Si^+$  ( $M+H$ )<sup>+</sup> 417.22443, found 417.22454.

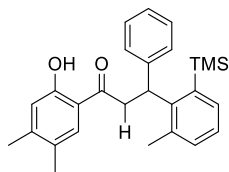

**1-(2-hydroxy-4,5-dimethylphenyl)-3-(2-methyl-6-(trimethylsilyl)phenyl)-3-phenylpropan-1-one (61):**

Yield 95%; 39.5 mg; yellow solid; mp 230–233°C; TLC (PET:EtOAc, 100:1 v/v):  $R_f$  = 0.3; <sup>1</sup>H NMR (600 MHz,  $CDCl_3$ )  $\delta$ =12.27 (d,  $J$  = 1.2 Hz, 1H), 7.70 (s, 1H), 7.56 (d,  $J$  = 7.2 Hz, 1H), 7.29 (dd,  $J$  = 13.8, 7.2 Hz, 3H), 7.25–7.22 (m, 2H), 7.07 (d,  $J$  = 7.2 Hz, 2H), 6.92 (s, 1H), 5.50 (d,  $J$  = 10.2 Hz, 1H), 4.46 (dd,  $J$  = 18.6, 10.8 Hz, 1H), 3.47 (d,  $J$  = 18.6 Hz, 1H), 2.35 (s, 3H), 2.31 (s, 3H), 2.04 (s, 3H), 0.46 (s, 9H). <sup>13</sup>C NMR (150 MHz,  $CDCl_3$ )  $\delta$ =203.2, 161.0, 148.9, 147.2, 143.0, 140.6, 137.0, 133.9, 132.8, 129.7, 128.2, 127.4, 127.3, 126.5, 125.8, 119.3, 117.4, 43.4, 41.7, 21.6, 20.6, 19.1, 0.7. HRMS (ESI)  $m/z$  calcd for  $C_{27}H_{33}O_2Si^+$  ( $M+H$ )<sup>+</sup> 417.22443, found 417.22454.

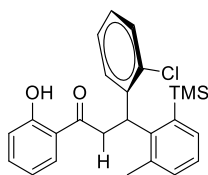

**1-(2-hydroxyphenyl)-3-(2-methyl-6-(trimethylsilyl)phenyl)-3-(o-tolyl)propan-1-one (62):**

Yield 92%; 38.8 mg; yellow oil; TLC (PET:EtOAc, 100:1 v/v):  $R_f$  = 0.3; <sup>1</sup>H NMR (600 MHz,  $CDCl_3$ )  $\delta$ =12.20 (s, 1H), 7.79 (d,  $J$  = 7.8 Hz, 1H), 7.47 (d,  $J$  = 7.2 Hz, 1H), 7.38 (t,  $J$  = 7.8 Hz, 1H), 7.31 (d,  $J$  = 7.8 Hz, 1H), 7.15 (t,  $J$  = 7.2 Hz, 1H), 7.07 (dd,  $J$  = 16.8, 7.2 Hz, 3H), 6.99 (d,  $J$  = 7.2 Hz, 1H), 6.92 (d,  $J$  = 8.4 Hz, 1H), 6.82 (t,  $J$  = 7.2 Hz, 1H), 5.43 (t,  $J$  = 6.6 Hz, 1H), 4.23 (dd,  $J$  = 18.6, 7.2 Hz, 1H), 3.70 (dd,  $J$  = 18.6, 5.4 Hz, 1H), 2.10 (s, 3H), 0.30 (s, 9H). <sup>13</sup>C NMR (150 MHz,  $CDCl_3$ )  $\delta$ =203.5, 162.6, 146.0, 141.4, 140.0, 136.5, 136.0, 134.1, 134.0, 133.7, 130.6, 130.0, 129.5, 127.9, 126.7, 126.4, 119.3, 119.1, 118.8, 43.8, 42.1, 23.2, 1.4. HRMS (ESI)  $m/z$  calcd for  $C_{25}H_{28}ClO_2Si^+$  ( $M+H$ )<sup>+</sup> 423.15416, found 423.15448.

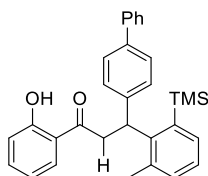

**3-([1,1'-biphenyl]-4-yl)-1-(2-hydroxyphenyl)-3-(2-methyl-6-(trimethylsilyl)phenyl)propan-1-one (63):**

Yield 88%; 40.8 mg; yellow solid; mp 123–124°C; TLC (PET:EtOAc, 100:1 v/v):  $R_f$  = 0.3;  $^1\text{H}$  NMR (600 MHz,  $\text{CDCl}_3$ )  $\delta$ =12.30 (s, 1H), 7.90 (d,  $J$  = 7.8 Hz, 1H), 7.53 (dd,  $J$  = 16.2, 7.8 Hz, 3H), 7.46 (dd,  $J$  = 15.6, 7.8 Hz, 3H), 7.39 (t,  $J$  = 7.8 Hz, 2H), 7.30 (d,  $J$  = 7.2 Hz, 1H), 7.21 (d,  $J$  = 7.2 Hz, 1H), 7.16 (d,  $J$  = 7.2 Hz, 1H), 7.05 (d,  $J$  = 8.4 Hz, 1H), 7.01 (d,  $J$  = 7.8 Hz, 2H), 6.94 (s, 1H), 5.41 (d,  $J$  = 10.2 Hz, 1H), 4.41 (dd,  $J$  = 18.6, 10.8 Hz, 1H), 3.40 (d,  $J$  = 18.6 Hz, 1H), 1.98 (s, 3H), 0.36 (s, 9H).  $^{13}\text{C}$  NMR (150 MHz,  $\text{CDCl}_3$ )  $\delta$ =204.9, 163.6, 149.5, 142.9, 141.7, 141.6, 139.5, 138.0, 137.6, 134.9, 133.8, 130.6, 129.7, 128.6, 128.1, 127.9, 127.9, 127.5, 120.3, 120.1, 119.8, 44.0, 42.8, 22.6, 1.6. HRMS (ESI)  $m/z$  calcd for  $\text{C}_{31}\text{H}_{32}\text{O}_2\text{SiNa}^+$  ( $\text{M}+\text{Na}$ ) $^+$  487.20638, found 487.20597.

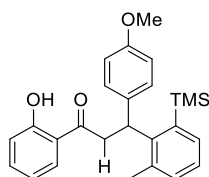

**1-(2-hydroxyphenyl)-3-(4-methoxyphenyl)-3-(2-methyl-6-(trimethylsilyl)phenyl)propan-1-one (64):**

Yield 90%; 37.6 mg; yellow solid; mp 155–158°C; TLC (PET:EtOAc, 50:1 v/v):  $R_f$  = 0.3;  $^1\text{H}$  NMR (600 MHz,  $\text{CDCl}_3$ )  $\delta$ =12.35 (s, 1H), 7.86 (d,  $J$  = 7.8 Hz, 1H), 7.47–7.38 (m, 2H), 7.19–7.09 (m, 2H), 6.97 (d,  $J$  = 8.4 Hz, 1H), 6.85 (t,  $J$  = 7.8 Hz, 3H), 6.72 (d,  $J$  = 8.4 Hz, 2H), 5.35 (d,  $J$  = 10.2 Hz, 1H), 4.36 (dd,  $J$  = 18.6, 10.2 Hz, 1H), 3.64 (s, 3H), 3.36 (d,  $J$  = 18.6 Hz, 1H), 1.96 (s, 3H), 0.36 (s, 9H).  $^{13}\text{C}$  NMR (150 MHz,  $\text{CDCl}_3$ )  $\delta$ =204.2, 162.8, 157.7, 148.9, 140.5, 137.1, 136.7, 134.9, 134.1, 132.9, 129.7, 128.2, 126.6, 119.5, 119.2, 118.9, 113.8, 55.2, 42.7, 42.1, 21.6, 0.8. HRMS (ESI)  $m/z$  calcd for  $\text{C}_{26}\text{H}_{30}\text{O}_3\text{SiNa}^+$  ( $\text{M}+\text{Na}$ ) $^+$  441.18564, found 441.18574.

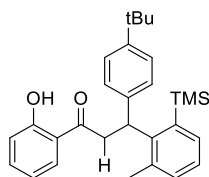

**3-(4-(tert-butyl)phenyl)-1-(2-hydroxyphenyl)-3-(2-methyl-6-(trimethylsilyl)phenyl)propan-1-one (65):**

Yield 96%; 42.6 mg; white solid; mp 160–163°C; TLC (PET:EtOAc, 100:1 v/v):  $R_f$  = 0.3;  $^1\text{H}$  NMR (600 MHz,  $\text{CDCl}_3$ )  $\delta$ =12.37 (s, 1H), 7.86 (d,  $J$  = 6.6 Hz, 1H), 7.46 (d,  $J$  = 6.0 Hz, 1H), 7.37 (d,  $J$  = 6.6 Hz, 1H), 7.17 (dd,  $J$  = 23.4, 7.2 Hz, 3H), 7.10 (d,  $J$  = 6.0 Hz, 1H), 6.97 (d,  $J$  = 7.8 Hz, 1H), 6.86 (dd,  $J$  = 34.2, 6.6 Hz, 3H), 5.40 (d,  $J$  = 9.6 Hz, 1H), 4.42 (dd,  $J$  = 18.0, 10.8 Hz, 1H), 3.33 (d,  $J$  = 18.6 Hz, 1H), 1.93 (s, 3H), 1.24 (s, 9H), 0.38 (s, 9H).  $^{13}\text{C}$  NMR (150 MHz,  $\text{CDCl}_3$ )  $\delta$ =204.2, 162.9, 149.0, 148.5, 140.5, 139.8, 137.1, 136.7, 134.1, 132.9, 129.7, 127.0, 126.6, 125.3, 119.5, 119.2, 119.0, 43.1, 41.9, 34.4, 31.6, 21.7, 0.9. HRMS (ESI)  $m/z$  calcd for  $\text{C}_{29}\text{H}_{36}\text{O}_2\text{SiNa}^+$  ( $\text{M}+\text{Na}$ ) $^+$  467.23768, found 467.23775.



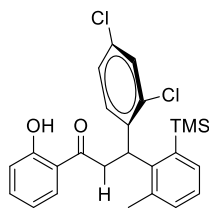

**3-(2,4-dichlorophenyl)-1-(2-hydroxyphenyl)-3-(2-methyl-6-(trimethylsilyl)phenyl)propan-1-one (66):**

Yield 62%; 28.3 mg; yellow oil; TLC (PET:EtOAc, 100:1 v/v):  $R_f = 0.3$ ;  $^1\text{H}$  NMR (600 MHz,  $\text{CDCl}_3$ )  $\delta=12.31$  (s, 1H), 8.00 (d,  $J = 7.2$  Hz, 1H), 7.67 (s, 2H), 7.57 (s, 1H), 7.44 (s, 1H), 7.40–7.37 (m, 1H), 7.30 (d,  $J = 6.6$  Hz, 2H), 7.18 (d,  $J = 7.8$  Hz, 1H), 7.10 (d,  $J = 8.4$  Hz, 1H), 5.55 (s, 1H), 4.38 (dd,  $J=18.6, 7.2$  Hz, 1H), 3.86 (d,  $J = 19.2$  Hz, 1H), 2.28 (s, 3H), 0.50 (s, 9H).  $^{13}\text{C}$  NMR (150 MHz,  $\text{CDCl}_3$ )  $\delta=203.0, 162.5, 145.5, 141.3, 138.7, 136.5, 135.7, 134.6, 133.9, 133.6, 132.7, 130.7, 130.2, 129.3, 126.7, 126.4, 119.0, 118.7, 43.2, 41.9, 23.0, 1.2$ . HRMS (ESI)  $m/z$  calcd for  $\text{C}_{25}\text{H}_{27}\text{Cl}_2\text{O}_2\text{Si}^+ (\text{M}+\text{H})^+$  457.11519, found 457.11529.

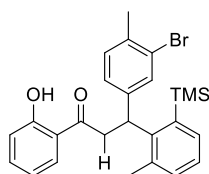

**3-(3-bromo-4-methylphenyl)-1-(2-hydroxyphenyl)-3-(2-methyl-6-(trimethylsilyl)phenyl)propan-1-one (67):**

Yield 93%; 44.6 mg; yellow oil; TLC (PET:EtOAc, 100:1 v/v):  $R_f = 0.3$ ;  $^1\text{H}$  NMR (600 MHz,  $\text{CDCl}_3$ )  $\delta=12.43$  (s, 1H), 8.00 (d,  $J = 7.8$  Hz, 1H), 7.60 (dd,  $J = 18.6, 7.8$  Hz, 2H), 7.34 (d,  $J = 7.2$  Hz, 1H), 7.33–7.28 (m, 2H), 7.19 (d,  $J = 7.8$  Hz, 1H), 7.15 (d,  $J = 8.4$  Hz, 1H), 7.03 (t,  $J = 7.2$  Hz, 1H), 6.96 (d,  $J = 7.8$  Hz, 1H), 5.50 (d,  $J = 10.2$  Hz, 1H), 4.48 (dd,  $J = 18.6, 10.2$  Hz, 1H), 3.57 (d,  $J = 18.6$  Hz, 1H), 2.45 (s, 3H), 2.13 (s, 3H), 0.51 (s, 9H).  $^{13}\text{C}$  NMR (150 MHz,  $\text{CDCl}_3$ )  $\delta=203.8, 162.7, 148.0, 142.6, 140.5, 136.8, 135.3, 134.1, 133.0, 131.2, 130.6, 129.7, 126.8, 126.2, 125.2, 119.3, 119.2, 118.9, 42.7, 42.0, 22.5, 21.7, 0.8$ . HRMS (ESI)  $m/z$  calcd for  $\text{C}_{26}\text{H}_{29}\text{BrO}_2\text{SiNa}^+ (\text{M}+\text{Na})^+$  503.10124, found 503.10131.

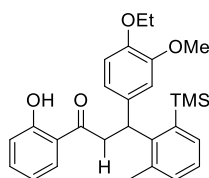

**3-(4-ethoxy-3-methoxyphenyl)-1-(2-hydroxyphenyl)-3-(2-methyl-6-(trimethylsilyl)phenyl)propan-1-one (68):**

Yield 87%; 40.2 mg; yellow oil; TLC (PET:EtOAc, 25:1 v/v):  $R_f = 0.3$ ;  $^1\text{H}$  NMR (600 MHz,  $\text{CDCl}_3$ )  $\delta=12.31$  (s, 1H), 7.90 (d,  $J = 7.8$  Hz, 1H), 7.56–7.49 (m, 1H), 7.45 (d,  $J = 7.2$  Hz, 1H), 7.23–7.17 (m, 1H), 7.15 (d,  $J = 7.2$  Hz, 1H), 7.04 (d,  $J = 8.4$  Hz, 1H), 6.97–6.91 (m, 1H), 6.72 (d,  $J = 8.4$  Hz, 1H), 6.45 (s, 2H), 5.32 (d,  $J = 10.2$  Hz,

1H), 4.37 (dd,  $J = 18.6, 10.8$  Hz, 1H), 4.07–3.99 (m, 2H), 3.61–3.53 (m, 3H), 3.32 (d,  $J = 18.6$  Hz, 1H), 1.99 (s, 3H), 1.42 (d,  $J = 7.2$  Hz, 3H), 0.40–0.32 (m, 9H).  $^{13}\text{C}$  NMR (150 MHz,  $\text{CDCl}_3$ )  $\delta = 203.9, 162.4, 148.8, 148.3, 146.2, 140.1, 136.9, 136.4, 135.0, 133.7, 132.5, 129.3, 126.2, 119.2, 118.9, 118.8, 118.6, 112.0, 111.5, 64.0, 55.6, 42.9, 41.5, 21.2, 14.7, 0.5$ . HRMS (ESI)  $m/z$  calcd for:  $\text{C}_{28}\text{H}_{34}\text{O}_4\text{SiNa}^+$  ( $\text{M}+\text{Na}$ ) $^+$  485.21186, found 485.21194.

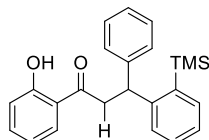

**1-(2-hydroxyphenyl)-3-phenyl-3-(2-(trimethylsilyl)phenyl)propan-1-one (69):**

Yield 92%; 34.4 mg; yellow solid; mp 120–123°C; TLC (PET:EtOAc, 100:1 v/v):  $R_f = 0.3$ ;  $^1\text{H}$  NMR (600 MHz,  $\text{CDCl}_3$ )  $\delta = 12.54$  (s, 1H), 8.05 (d,  $J = 7.8$  Hz, 1H), 7.83 (d,  $J = 7.2$  Hz, 1H), 7.62 (t,  $J = 7.8$  Hz, 1H), 7.53–7.50 (m, 1H), 7.44 (dt,  $J = 22.2, 7.2$  Hz, 5H), 7.37 (t,  $J = 7.2$  Hz, 2H), 7.19 (d,  $J = 8.4$  Hz, 1H), 7.07 (t,  $J = 7.8$  Hz, 1H), 5.49 (dd,  $J = 9.6, 3.6$  Hz, 1H), 4.25 (dd,  $J = 18.0, 9.6$  Hz, 1H), 3.67 (dd,  $J = 18.0, 4.2$  Hz, 1H), 0.66 (s, 9H).  $^{13}\text{C}$  NMR (150 MHz,  $\text{CDCl}_3$ )  $\delta = 203.5, 162.4, 150.0, 143.4, 138.2, 136.3, 135.0, 129.5, 129.4, 128.3, 128.1, 127.6, 126.1, 125.8, 119.2, 118.8, 118.5, 44.9, 43.8, 0.5$ . HRMS (ESI)  $m/z$  calcd for  $\text{C}_{24}\text{H}_{26}\text{O}_2\text{SiNa}^+$  ( $\text{M}+\text{Na}$ ) $^+$  397.15943, found 397.15951.

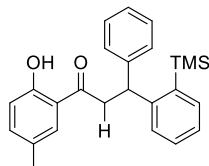

**1-(2-hydroxy-5-methylphenyl)-3-phenyl-3-(2-(trimethylsilyl)phenyl)propan-1-one (70):**

Yield 51%; 19.8 mg; white solid; mp 179–182°C; TLC (PET:EtOAc, 100:1 v/v):  $R_f = 0.3$ ;  $^1\text{H}$  NMR (600 MHz,  $\text{CDCl}_3$ )  $\delta = 12.21$  (s, 1H), 7.78 (s, 1H), 7.71 (d,  $J = 7.2$  Hz, 1H), 7.51–7.33 (m, 5H), 7.30 (d,  $J = 6.0$  Hz, 3H), 7.26 (d,  $J = 7.8$  Hz, 1H), 7.02 (d,  $J = 8.4$  Hz, 1H), 5.35 (dd,  $J = 9.6, 3.6$  Hz, 1H), 4.16 (dd,  $J = 18.0, 10.2$  Hz, 1H), 3.56 (dd,  $J = 18.0, 4.2$  Hz, 1H), 2.43 (s, 3H), 0.54 (s, 9H).  $^{13}\text{C}$  NMR (150 MHz,  $\text{CDCl}_3$ )  $\delta = 203.7, 160.8, 150.6, 143.8, 138.6, 137.8, 135.4, 129.9, 129.7, 128.7, 128.6, 128.4, 128.1, 126.5, 126.2, 119.3, 118.7, 45.4, 44.2, 20.9, 0.9$ . HRMS (ESI)  $m/z$  calcd for  $\text{C}_{25}\text{H}_{29}\text{O}_2\text{Si}^+$  ( $\text{M}+\text{H}$ ) $^+$  389.19313, found 389.19322.

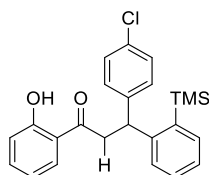

**3-(4-chlorophenyl)-1-(2-hydroxyphenyl)-3-(2-(trimethylsilyl)phenyl)propan-1-one (71):**

Yield 91%; 37.1 mg; yellow oil; TLC (PET:EtOAc, 100:1 v/v):  $R_f = 0.3$ ;  $^1\text{H NMR}$  (600 MHz,  $\text{CDCl}_3$ )  $\delta=12.29$  (s, 1H), 7.93 (d,  $J = 7.8$  Hz, 1H), 7.67 (d,  $J = 7.2$  Hz, 1H), 7.55 (t,  $J = 7.8$  Hz, 1H), 7.42–7.38 (m, 1H), 7.32 (dd,  $J = 15.6, 7.8$  Hz, 3H), 7.17 (t,  $J = 7.8$  Hz, 3H), 7.07 (d,  $J = 8.4$  Hz, 1H), 6.99 (d,  $J = 7.2$  Hz, 1H), 5.31–5.24 (m, 1H), 4.07 (dd,  $J = 18.0, 10.2$  Hz, 1H), 3.53 (dd,  $J = 18.0, 3.6$  Hz, 1H), 0.49 (s, 9H).  $^{13}\text{C NMR}$  (150 MHz,  $\text{CDCl}_3$ )  $\delta=203.3, 162.5, 149.6, 142.1, 138.3, 136.6, 135.1, 132.0, 129.6, 129.5, 129.1, 128.5, 128.0, 126.0, 119.2, 119.0, 118.6, 44.9, 43.2, 0.5$ . HRMS (ESI)  $m/z$  calcd for  $\text{C}_{24}\text{H}_{25}\text{ClO}_2\text{SiNa}^+$  ( $\text{M}+\text{Na}$ ) $^+$  431.12046, found 431.12058.

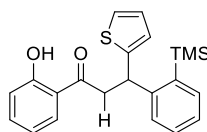

**1-(2-hydroxyphenyl)-3-(thiophen-2-yl)-3-(2-(trimethylsilyl)phenyl)propan-1-one (72):**

Yield 85%; 32.3 mg; yellow solid; mp 130–132°C; TLC (PET:EtOAc, 100:1 v/v):  $R_f = 0.3$ ;  $^1\text{H NMR}$  (600 MHz,  $\text{CDCl}_3$ )  $\delta=12.26$  (s, 1H), 7.79 (d,  $J = 7.8$  Hz, 1H), 7.55 (d,  $J = 7.2$  Hz, 1H), 7.41 (t,  $J = 7.8$  Hz, 1H), 7.33 (s, 2H), 7.23 (s, 1H), 7.06 (d,  $J = 4.8$  Hz, 1H), 6.95 (d,  $J = 8.4$  Hz, 1H), 6.89–6.78 (m, 2H), 6.70 (d,  $J = 2.4$  Hz, 1H), 5.39–5.31 (m, 1H), 4.04 (dd,  $J = 18.0, 10.2$  Hz, 1H), 3.39 (dd,  $J = 18.0, 3.0$  Hz, 1H), 0.39 (s, 9H).  $^{13}\text{C NMR}$  (150 MHz,  $\text{CDCl}_3$ )  $\delta=203.2, 162.6, 149.5, 148.3, 138.1, 136.7, 135.0, 135.0, 129.7, 127.7, 126.6, 126.4, 124.4, 124.1, 119.4, 119.1, 118.7, 46.5, 40.2, 0.5$ . HRMS (ESI)  $m/z$  calcd for  $\text{C}_{22}\text{H}_{24}\text{O}_2\text{SSiNa}^+$  ( $\text{M}+\text{Na}$ ) $^+$  403.11585, found 403.11595.

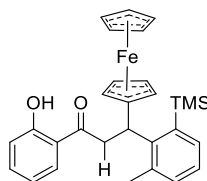

**3-(ferrocenyl)-1-(2-hydroxyphenyl)-3-(2-methyl-6-(trimethylsilyl)phenyl)propan-1-one (73):**

Yield 94%; 46.6 mg; brown solid; mp 195–198°C; TLC (PET:EtOAc, 100:1 v/v):  $R_f = 0.3$ ;  $^1\text{H NMR}$  (600 MHz,  $\text{CDCl}_3$ )  $\delta=12.72$  (s, 1H), 7.85 (d,  $J = 5.4$  Hz, 1H), 7.48 (s, 1H), 7.36 (s, 1H), 7.05 (dd,  $J = 24.6, 18.0$  Hz, 3H), 6.91 (s, 1H), 5.32 (d,  $J = 8.4$  Hz, 1H), 4.21 (d,  $J = 12.0$  Hz, 1H), 4.13 (s, 5H), 4.00 (s, 1H), 3.95 (s, 1H), 3.88 (s, 1H), 3.79 (s, 1H), 2.87 (d,  $J = 16.8$  Hz, 1H), 1.91 (s, 3H), 0.53 (s, 9H).  $^{13}\text{C NMR}$  (150 MHz,  $\text{CDCl}_3$ )  $\delta=203.9, 163.1, 149.5, 139.0, 136.7, 134.0, 132.8, 129.8, 126.2, 119.7, 119.3, 119.0, 92.1, 69.5, 69.1, 67.9, 67.5, 65.6, 40.9, 40.7, 21.8, 1.1$ . HRMS (ESI)  $m/z$  calcd for  $\text{C}_{29}\text{H}_{32}\text{FeO}_2\text{Si}^+$  ( $\text{M}$ ) $^+$  496.15160, found 496.15278.

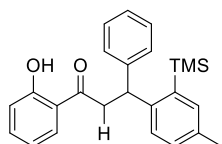

**1-(2-hydroxyphenyl)-3-(4-methyl-2-(trimethylsilyl)phenyl)-3-phenylpropan-1-one (74):**

Yield 97%; 37.6 mg; yellow solid; mp 121–124°C; TLC (PET:EtOAc, 100:1 v/v):  $R_f$  = 0.3;  $^1\text{H}$  NMR (600 MHz,  $\text{CDCl}_3$ )  $\delta$ =12.36 (s, 1H), 7.96 (d,  $J$  = 7.8 Hz, 1H), 7.55 (t,  $J$  = 7.8 Hz, 1H), 7.49 (s, 1H), 7.37–7.33 (m, 2H), 7.25 (dd,  $J$  = 17.4, 7.8 Hz, 4H), 7.13 (d,  $J$  = 7.8 Hz, 1H), 7.08 (d,  $J$  = 8.4 Hz, 1H), 6.99 (t,  $J$  = 7.2 Hz, 1H), 5.29 (d,  $J$  = 6.0 Hz, 1H), 4.11 (dd,  $J$  = 18.0, 9.6 Hz, 1H), 3.56–3.49 (m, 1H), 2.44 (s, 3H), 0.50 (s, 9H).  $^{13}\text{C}$  NMR (150 MHz,  $\text{CDCl}_3$ )  $\delta$ =203.6, 162.5, 147.1, 143.6, 138.1, 136.4, 135.7, 135.0, 130.3, 129.6, 128.4, 128.1, 127.7, 126.1, 119.3, 118.9, 118.6, 45.1, 43.4, 21.1, 0.6. HRMS (ESI)  $m/z$  calcd for  $\text{C}_{25}\text{H}_{28}\text{O}_2\text{SiNa}^+$  ( $\text{M}+\text{Na}$ ) $^+$  411.17508, found 411.17517.

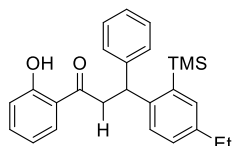

**3-(4-ethyl-2-(trimethylsilyl)phenyl)-1-(2-hydroxyphenyl)-3-phenylpropan-1-one (75):**

Yield 95%; 38.2 mg; yellow solid; mp 145–148°C; TLC (PET:EtOAc, 100:1 v/v):  $R_f$  = 0.3;  $^1\text{H}$  NMR (600 MHz,  $\text{CDCl}_3$ )  $\delta$ =12.39 (s, 1H), 7.97 (d,  $J$  = 7.8 Hz, 1H), 7.59–7.46 (m, 2H), 7.40–7.31 (m, 2H), 7.32–7.20 (m, 4H), 7.16 (d,  $J$  = 7.8 Hz, 1H), 7.09 (d,  $J$  = 8.4 Hz, 1H), 6.99 (d,  $J$  = 7.2 Hz, 1H), 5.31 (dd,  $J$  = 9.6, 3.6 Hz, 1H), 4.13 (dd,  $J$  = 18.0, 10.2 Hz, 1H), 3.53 (dd,  $J$  = 18.0, 4.2 Hz, 1H), 2.76 (dd,  $J$  = 15.0, 7.2 Hz, 2H), 1.37 (s, 3H), 0.53 (s, 9H).  $^{13}\text{C}$  NMR (150 MHz,  $\text{CDCl}_3$ )  $\delta$ =203.4, 162.2, 147.2, 143.4, 141.0, 137.7, 136.2, 134.3, 129.4, 128.8, 128.1, 127.9, 127.4, 125.9, 119.1, 118.7, 118.3, 44.8, 43.2, 28.3, 15.2, 0.4. HRMS (ESI)  $m/z$  calcd for  $\text{C}_{26}\text{H}_{30}\text{O}_2\text{SiNa}^+$  ( $\text{M}+\text{Na}$ ) $^+$  425.19073, found 425.19082.

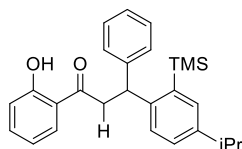

**1-(2-hydroxyphenyl)-3-(4-isopropyl-2-(trimethylsilyl)phenyl)-3-phenylpropan-1-one (76):**

Yield 91%; 37.8 mg; yellow solid; mp 138–141°C; TLC (PET:EtOAc, 100:1 v/v):  $R_f$  = 0.3;  $^1\text{H}$  NMR (600 MHz,  $\text{CDCl}_3$ )  $\delta$ =12.43 (s, 1H), 7.99 (d,  $J$  = 7.8 Hz, 1H), 7.62–7.54 (m, 2H), 7.39 (t,  $J$  = 7.2 Hz, 2H), 7.36–7.28 (m, 4H), 7.22 (d,  $J$  = 7.8 Hz, 1H), 7.12 (d,  $J$  = 8.4 Hz, 1H), 7.01 (t,  $J$  = 7.8 Hz, 1H), 5.35 (dd,  $J$  = 9.6, 3.0 Hz, 1H), 4.17 (dd,  $J$  = 18.0, 10.2 Hz, 1H), 3.57 (dd,  $J$  = 18.0, 3.6 Hz, 1H), 3.11–3.02 (m, 1H), 1.42 (dd,  $J$  = 6.6, 2.4 Hz, 6H), 0.59 (d,  $J$  = 16.2 Hz, 9H).  $^{13}\text{C}$  NMR (150 MHz,  $\text{CDCl}_3$ )

$\delta$ =203.8, 162.6, 147.6, 145.9, 143.8, 138.0, 136.5, 133.4, 129.8, 128.5, 128.2, 127.9, 127.6, 126.2, 119.5, 119.0, 118.7, 45.3, 43.6, 33.9, 24.2, 24.1, 0.8. HRMS (ESI)  $m/z$  calcd for  $C_{27}H_{33}O_2Si^+$  ( $M+H$ )<sup>+</sup> 417.22443, found 417.22456.

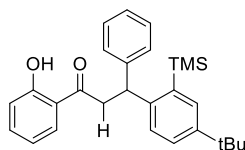

**3-(4-(tert-butyl)-2-(trimethylsilyl)phenyl)-1-(2-hydroxyphenyl)-3-phenylpropan-1-one (77):**

Yield 93%; 40.0 mg; yellow solid; mp 165–168°C; TLC (PET:EtOAc, 100:1 v/v):  $R_f$  = 0.3; <sup>1</sup>H NMR (600 MHz,  $CDCl_3$ )  $\delta$ =12.16 (s, 1H), 7.73 (d,  $J$  = 7.8 Hz, 1H), 7.48 (s, 1H), 7.32 (t,  $J$  = 7.8 Hz, 1H), 7.21 (d,  $J$  = 7.8 Hz, 1H), 7.13 (t,  $J$  = 7.2 Hz, 2H), 7.09–7.03 (m, 3H), 6.94 (d,  $J$  = 8.4 Hz, 1H), 6.86 (d,  $J$  = 8.4 Hz, 1H), 6.76 (t,  $J$  = 7.8 Hz, 1H), 5.07 (dd,  $J$  = 9.6, 3.0 Hz, 1H), 3.91 (dd,  $J$  = 18.0, 10.2 Hz, 1H), 3.29 (dd,  $J$  = 18.0, 3.6 Hz, 1H), 1.22 (s, 9H), 0.30 (s, 9H). <sup>13</sup>C NMR (150 MHz,  $CDCl_3$ )  $\delta$ =203.8, 162.6, 148.0, 147.2, 143.7, 137.5, 136.5, 131.8, 129.7, 128.5, 127.9, 127.8, 126.7, 126.2, 119.5, 119.0, 118.7, 45.3, 43.5, 34.6, 31.5, 0.8. HRMS (ESI)  $m/z$  calcd for  $C_{28}H_{34}O_2SiNa^+$  ( $M+Na$ )<sup>+</sup> 453.22203, found 453.22213.

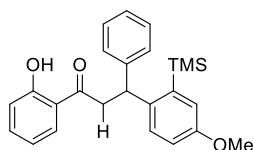

**1-(2-hydroxyphenyl)-3-(4-methoxy-2-(trimethylsilyl)phenyl)-3-phenylpropan-1-one (78):**

Yield 98%; 39.6 mg; yellow oil; TLC (PET:EtOAc, 50:1 v/v):  $R_f$  = 0.3; <sup>1</sup>H NMR (600 MHz,  $CDCl_3$ )  $\delta$ =12.44 (s, 1H), 7.99 (d,  $J$  = 7.8 Hz, 1H), 7.60–7.53 (m, 1H), 7.41–7.34 (m, 2H), 7.36–7.25 (m, 4H), 7.22 (d,  $J$  = 8.4 Hz, 1H), 7.10 (d,  $J$  = 8.4 Hz, 1H), 7.00 (dd,  $J$  = 15.6, 7.8 Hz, 2H), 5.40–5.26 (m, 1H), 4.13 (dd,  $J$  = 18.0, 9.6 Hz, 1H), 3.90 (s, 3H), 3.57 (dd,  $J$  = 18.0, 4.2 Hz, 1H), 0.55 (s, 9H). <sup>13</sup>C NMR (150 MHz,  $CDCl_3$ )  $\delta$ =203.8, 162.6, 157.3, 143.9, 142.0, 139.9, 136.5, 129.7, 129.3, 128.4, 127.7, 126.2, 120.8, 119.3, 119.0, 118.6, 114.2, 55.0, 45.3, 43.1, 0.5. HRMS (ESI)  $m/z$  calcd for  $C_{25}H_{28}O_3SiNa^+$  ( $M+Na$ )<sup>+</sup> 427.16999, found 427.17008.

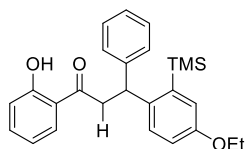

**3-(4-ethoxy-2-(trimethylsilyl)phenyl)-1-(2-hydroxyphenyl)-3-phenylpropan-1-one (79):**

Yield 97%; 40.6 mg; yellow solid; mp 155–156°C; TLC (PET:EtOAc, 100:1 v/v):  $R_f$  = 0.3; <sup>1</sup>H NMR (600 MHz,  $CDCl_3$ )  $\delta$ =12.34 (s, 1H), 7.81 (d,  $J$  = 7.2 Hz, 1H), 7.40–7.33 (m, 1H), 7.17 (ddd,  $J$  = 24.6, 20.4, 6.6 Hz, 6H), 7.07 (d,  $J$  = 8.4 Hz, 1H),

6.93 (d,  $J = 7.8$  Hz, 1H), 6.87–6.76 (m, 2H), 5.25–5.13 (m, 1H), 4.04–3.87 (m, 3H), 3.49–3.37 (m, 1H), 1.43–1.29 (m, 3H), 0.41 (s, 9H).  $^{13}\text{C}$  NMR (150 MHz,  $\text{CDCl}_3$ )  $\delta$ =204.1, 162.8, 157.0, 144.2, 142.0, 140.0, 136.7, 129.9, 129.5, 128.6, 127.9, 126.4, 121.7, 119.5, 119.2, 118.8, 114.9, 63.3, 45.5, 43.4, 15.2, 0.8. HRMS (ESI)  $m/z$  calcd for  $\text{C}_{26}\text{H}_{30}\text{O}_3\text{SNa}^+$  ( $\text{M}+\text{Na}$ ) $^+$  441.18564, found 441.18572.

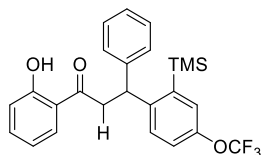

**1-(2-hydroxyphenyl)-3-phenyl-3-(4-(trifluoromethoxy)-2-(trimethylsilyl)phenyl)propan-1-one (80):**

Yield 94%; 43.0 mg; yellow oil; TLC (PET:EtOAc, 100:1 v/v):  $R_f = 0.3$ ;  $^1\text{H}$  NMR (600 MHz,  $\text{CDCl}_3$ )  $\delta$ =12.19 (s, 1H), 7.88 (d,  $J = 7.8$  Hz, 1H), 7.51 (t,  $J = 7.8$  Hz, 1H), 7.37 (s, 1H), 7.28 (dd,  $J = 13.8, 6.6$  Hz, 2H), 7.23–7.19 (m, 1H), 7.13 (t,  $J = 8.4$  Hz, 4H), 7.01 (d,  $J = 8.4$  Hz, 1H), 6.94 (t,  $J = 7.8$  Hz, 1H), 5.21 (dd,  $J = 9.6, 4.2$  Hz, 1H), 4.02 (dd,  $J = 18.0, 9.6$  Hz, 1H), 3.39 (dd,  $J = 18.0, 4.2$  Hz, 1H), 0.42 (s, 9H).  $^{13}\text{C}$  NMR (150 MHz,  $\text{CDCl}_3$ )  $\delta$ =203.1, 162.5, 148.7, 147.3, 142.9, 141.2, 136.6, 129.6, 128.6, 127.6, 127.1, 126.5, 121.7, 119.2, 119.0, 118.7, 44.9, 43.2, 0.3.  $^{19}\text{F}$  NMR (375 MHz,  $\text{CDCl}_3$ )  $\delta$ =57.63. HRMS (ESI)  $m/z$  calcd for  $\text{C}_{25}\text{H}_{25}\text{F}_3\text{O}_3\text{SiNa}^+$  ( $\text{M}+\text{Na}$ ) $^+$  481.14173, found 481.14181.

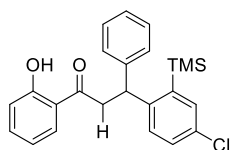

**3-(4-chloro-2-(trimethylsilyl)phenyl)-1-(2-hydroxyphenyl)-3-phenylpropan-1-one (81):**

Yield 93%; 37.9 mg; yellow solid; mp 190–193°C; TLC (PET:EtOAc, 100:1 v/v):  $R_f = 0.3$ ;  $^1\text{H}$  NMR (600 MHz,  $\text{CDCl}_3$ )  $\delta$ =12.16 (s, 1H), 7.85 (d,  $J = 7.8$  Hz, 1H), 7.48 (d,  $J = 6.6$  Hz, 2H), 7.25 (d,  $J = 7.8$  Hz, 3H), 7.19 (d,  $J = 7.2$  Hz, 1H), 7.09 (d,  $J = 7.8$  Hz, 2H), 7.00 (dd,  $J = 18.6, 8.4$  Hz, 2H), 6.92 (t,  $J = 7.2$  Hz, 1H), 5.15 (dd,  $J = 9.6, 4.2$  Hz, 1H), 3.96 (dd,  $J = 18.0, 9.6$  Hz, 1H), 3.37 (dd,  $J = 18.0, 4.2$  Hz, 1H), 0.37 (s, 9H).  $^{13}\text{C}$  NMR (150 MHz,  $\text{CDCl}_3$ )  $\delta$ =203.0, 162.4, 148.2, 142.8, 141.0, 136.4, 134.5, 132.0, 129.5, 129.4, 129.3, 128.4, 127.5, 126.3, 119.1, 118.9, 118.5, 44.7, 43.1, 0.2. HRMS (ESI)  $m/z$  calcd for  $\text{C}_{24}\text{H}_{25}\text{ClO}_2\text{Si}^+$  ( $\text{M}+\text{Na}$ ) $^+$  431.12046, found 431.12056.

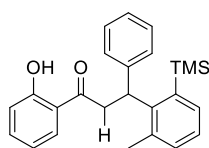

**1-(2-hydroxyphenyl)-3-(2-methyl-6-(trimethylsilyl)phenyl)-3-phenylpropan-1-one (82):**

Yield 96%; 37.3 mg; white solid; mp 173–176°C; TLC (PET:EtOAc, 100:1 v/v):  $R_f$  = 0.3;  $^1\text{H}$  NMR (600 MHz,  $\text{CDCl}_3$ )  $\delta$ =12.35 (s, 1H), 7.87 (d,  $J$  = 7.3 Hz, 1H), 7.49 – 7.41 (m, 2H), 7.18 (dt,  $J$  = 11.8, 7.6 Hz, 3H), 7.11 (dd,  $J$  = 12.5, 6.7 Hz, 2H), 7.00 (d,  $J$  = 8.3 Hz, 1H), 6.95 (d,  $J$  = 7.7 Hz, 2H), 6.88 (t,  $J$  = 7.3 Hz, 1H), 5.41 (d,  $J$  = 10.2 Hz, 1H), 4.40 (dd,  $J$  = 18.8, 10.5 Hz, 1H), 3.37 (d,  $J$  = 18.7 Hz, 1H), 1.92 (s, 3H), 0.36 (s, 9H).  $^{13}\text{C}$  NMR (150 MHz,  $\text{CDCl}_3$ )  $\delta$ =203.6, 162.4, 148.3, 142.5, 140.2, 136.7, 136.4, 133.7, 132.5, 129.3, 128.0, 126.9, 126.2, 125.5, 119.0, 118.9, 118.6, 42.9, 41.5, 21.2, 0.4. HRMS (ESI)  $m/z$  calcd for  $\text{C}_{25}\text{H}_{29}\text{O}_2\text{Si}^+$  ( $\text{M}+\text{H}$ ) $^+$  389.19313, found 389.19323.

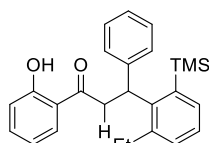

**3-(2-ethyl-6-(trimethylsilyl)phenyl)-1-(2-hydroxyphenyl)-3-phenylpropan-1-one (83):**

Yield 98%; 39.4 mg; white solid; mp 193–197 °C; TLC (PET:EtOAc, 100:1 v/v):  $R_f$  = 0.3;  $^1\text{H}$  NMR (600 MHz,  $\text{CDCl}_3$ )  $\delta$ =12.32 (s, 1H), 7.86 (d,  $J$  = 7.2 Hz, 1H), 7.44 (d,  $J$  = 19.2 Hz, 2H), 7.24 (s, 2H), 7.16 (s, 2H), 7.10 (s, 1H), 6.99 (d,  $J$  = 10.2 Hz, 3H), 6.88 (s, 1H), 5.40 (d,  $J$  = 9.6 Hz, 1H), 4.37 (dd,  $J$  = 18.0, 10.8 Hz, 1H), 3.41 (d,  $J$  = 18.6 Hz, 1H), 2.40–2.25 (m, 2H), 0.83 (s, 3H), 0.36 (s, 9H).  $^{13}\text{C}$  NMR (150 MHz,  $\text{CDCl}_3$ )  $\delta$ =204.0, 162.8, 148.2, 143.6, 143.2, 140.6, 136.7, 132.8, 132.3, 129.6, 128.3, 127.4, 126.9, 125.9, 119.4, 119.2, 119.0, 43.4, 43.1, 26.4, 15.3, 0.8. HRMS (ESI)  $m/z$  calcd for  $\text{C}_{26}\text{H}_{30}\text{O}_2\text{SiNa}^+$  ( $\text{M}+\text{Na}$ ) $^+$  425.19073, found 425.19080.

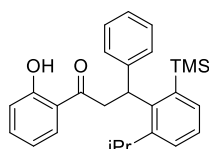

**1-(2-hydroxyphenyl)-3-(2-isopropyl-6-(trimethylsilyl)phenyl)-3-phenylpropan-1-one (84):**

Yield 97%; 40.4 mg; yellow solid; mp 125–128°C; TLC (PET:EtOAc, 100:1 v/v):  $R_f$  = 0.3;  $^1\text{H}$  NMR (600 MHz,  $\text{CDCl}_3$ )  $\delta$ =12.61 (s, 1H), 8.12 (d,  $J$  = 7.8 Hz, 1H), 7.77–7.63 (m, 2H), 7.61–7.51 (m, 2H), 7.41 (t,  $J$  = 7.2 Hz, 2H), 7.37–7.32 (m, 1H), 7.18 (dt,  $J$  = 15.0, 9.0 Hz, 4H), 5.66 (d,  $J$  = 10.2 Hz, 1H), 4.61 (dd,  $J$  = 18.6, 10.8 Hz, 1H), 3.71 (d,  $J$  = 18.6 Hz, 1H), 3.10–2.99 (m, 1H), 1.52 (d,  $J$  = 6.6 Hz, 3H), 1.13 (t,  $J$  = 6.6 Hz, 1H), 0.82 (d,  $J$  = 6.6 Hz, 2H), 0.63 (s, 9H).  $^{13}\text{C}$  NMR (150 MHz,  $\text{CDCl}_3$ )  $\delta$ =203.9, 162.9, 148.1, 147.6, 143.7, 140.5, 136.7, 132.8, 129.5, 128.2, 127.3, 127.1, 125.8, 119.4, 119.3, 119.0, 43.3, 30.1, 25.0, 23.1, 0.8. HRMS (ESI)  $m/z$  calcd for  $\text{C}_{27}\text{H}_{32}\text{O}_2\text{SiNa}^+$  ( $\text{M}+\text{Na}$ ) $^+$  439.20638, found 439.20647.

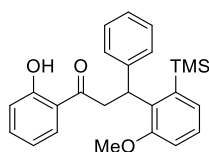

**1-(2-hydroxyphenyl)-3-(2-methoxy-6-(trimethylsilyl)phenyl)-3-phenylpropan-1-one (85):**

Yield 99%; 40.1 mg; white solid; mp 158–161 °C; TLC (PET:EtOAc, 50:1 v/v):  $R_f = 0.3$ ;  $^1\text{H NMR}$  (600 MHz,  $\text{CDCl}_3$ )  $\delta=12.39$  (s, 1H), 7.90 (d,  $J = 7.2$  Hz, 1H), 7.42 (s, 1H), 7.24 (t,  $J = 6.6$  Hz, 1H), 7.16 (dd,  $J = 27.0, 6.0$  Hz, 3H), 7.07 (d,  $J = 6.0$  Hz, 1H), 7.01 (d,  $J = 6.6$  Hz, 2H), 6.97 (d,  $J = 7.8$  Hz, 1H), 6.87 (s, 2H), 5.17 (d,  $J = 9.0$  Hz, 1H), 4.56 (dd,  $J = 18.0, 9.6$  Hz, 1H), 3.37 (d,  $J = 13.2$  Hz, 4H), 0.37 (s, 9H).  $^{13}\text{C NMR}$  (150 MHz,  $\text{CDCl}_3$ )  $\delta=205.1, 162.7, 158.4, 143.7, 141.0, 138.9, 136.4, 129.9, 127.8, 127.3, 127.1, 125.4, 119.6, 119.0, 118.7, 114.4, 55.5, 42.0, 41.8, 0.7$ . HRMS (ESI)  $m/z$  calcd for  $\text{C}_{25}\text{H}_{28}\text{O}_3\text{SiNa}^+$  ( $\text{M}+\text{Na}$ ) $^+$  427.16999, found 427.17007.

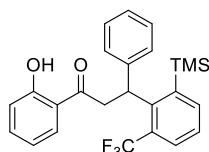

**1-(2-hydroxyphenyl)-3-phenyl-3-(2-(trifluoromethyl)-6-(trimethylsilyl)phenyl)propan-1-one (86):**

Yield 97%; 42.9 mg; yellow solid; mp 155–158°C; TLC (PET:EtOAc, 100:1 v/v):  $R_f = 0.3$ ;  $^1\text{H NMR}$  (600 MHz,  $\text{CDCl}_3$ )  $\delta=12.28$  (s, 1H), 7.87 (dd,  $J = 29.4, 6.0$  Hz, 2H), 7.73 (d,  $J = 7.2$  Hz, 1H), 7.41 (dd,  $J = 18.6, 6.6$  Hz, 2H), 7.20–7.08 (m, 3H), 6.99 (d,  $J = 7.8$  Hz, 1H), 6.87 (s, 3H), 5.65 (d,  $J = 9.0$  Hz, 1H), 4.45 (dd,  $J = 18.0, 9.6$  Hz, 1H), 3.52 (d,  $J = 19.2$  Hz, 1H), 0.37 (s, 9H).  $^{13}\text{C NMR}$  (150 MHz,  $\text{CDCl}_3$ )  $\delta=203.9, 162.8, 147.8, 144.7, 142.7, 139.0, 136.7, 129.9, 129.7, 128.0, 127.1, 126.9, 125.9, 125.8, 124.0, 119.3, 118.8, 43.6, 42.9, 0.8$ .  $^{19}\text{F NMR}$  (375 MHz,  $\text{CDCl}_3$ )  $\delta=55.30$ . HRMS (ESI)  $m/z$  calcd for:  $\text{C}_{25}\text{H}_{26}\text{F}_3\text{O}_2\text{Si}^+$  ( $\text{M}+\text{H}$ ) $^+$  443.16487, found 443.16497.

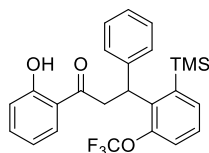

**1-(2-hydroxyphenyl)-3-phenyl-3-(2-(trifluoromethoxy)-6-(trimethylsilyl)phenyl)propan-1-one (87):**

Yield 97%; 44.4 mg; yellow oil; TLC (PET:EtOAc, 100:1 v/v):  $R_f = 0.3$ ;  $^1\text{H NMR}$  (600 MHz,  $\text{CDCl}_3$ )  $\delta=12.23$  (s, 1H), 7.86 (d,  $J = 7.2$  Hz, 1H), 7.42 (d,  $J = 6.0$  Hz, 1H), 7.37 (d,  $J = 7.2$  Hz, 1H), 7.19 (dd,  $J = 15.0, 7.8$  Hz, 2H), 7.10 (d,  $J = 6.6$  Hz, 2H), 7.05 (d,  $J = 6.0$  Hz, 1H), 6.98–6.90 (m, 3H), 6.83 (d,  $J = 7.2$  Hz, 1H), 5.30 (d,  $J = 9.6$  Hz, 1H), 4.48 (dd,  $J = 18.6, 10.2$  Hz, 1H), 3.26 (d,  $J = 18.6$  Hz, 1H), 0.36 (s, 9H).  $^{13}\text{C NMR}$  (150 MHz,  $\text{CDCl}_3$ )  $\delta=203.8, 162.8, 149.2, 143.1, 141.9, 141.1, 136.7, 132.6, 129.7, 128.2, 128.1, 127.0, 126.0, 120.0, 119.4, 119.3, 118.9, 41.4, 0.5$ .  $^{19}\text{F NMR}$  (375 MHz,  $\text{CDCl}_3$ )  $\delta=55.20$ . HRMS (ESI)  $m/z$  calcd for  $\text{C}_{25}\text{H}_{25}\text{F}_3\text{O}_3\text{SiNa}^+$  ( $\text{M}+\text{Na}$ ) $^+$  481.14173, found 481.14180.



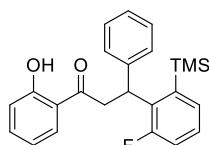

**3-(2-fluoro-6-(trimethylsilyl)phenyl)-1-(2-hydroxyphenyl)-3-phenylpropan-1-one (88):**

Yield 84%; 32.9 mg; yellow solid; mp 123–125°C; TLC (PET:EtOAc, 100:1 v/v):  $R_f$  = 0.3;  $^1\text{H}$  NMR (600 MHz,  $\text{CDCl}_3$ )  $\delta$ =12.29 (s, 1H), 7.88 (d,  $J$  = 7.2 Hz, 1H), 7.43 (s, 1H), 7.34 (d,  $J$  = 6.0 Hz, 1H), 7.21 (dd,  $J$  = 13.2, 6.6 Hz, 3H), 7.14 (d,  $J$  = 6.6 Hz, 1H), 7.07 (d,  $J$  = 6.0 Hz, 2H), 6.99 (t,  $J$  = 9.0 Hz, 2H), 6.88 (d,  $J$  = 6.6 Hz, 1H), 5.25 (d,  $J$  = 7.2 Hz, 1H), 4.36 (dd,  $J$  = 18.0, 9.6 Hz, 1H), 3.45 (d,  $J$  = 18.6 Hz, 1H), 0.38 (s, 9H).  $^{13}\text{C}$  NMR (150 MHz,  $\text{CDCl}_3$ )  $\delta$ =204.1, 162.9, 162.7, 161.3, 142.4, 136.6, 136.4, 136.4, 130.6, 129.9, 128.3, 128.3, 127.1, 126.2, 119.4, 119.1, 118.7, 117.6, 117.4, 42.5, 41.1, 0.6.  $^{19}\text{F}$  NMR (375 MHz,  $\text{CDCl}_3$ )  $\delta$ =111.04. HRMS (ESI)  $m/z$  calcd for  $\text{C}_{24}\text{H}_{26}\text{FO}_2\text{Si}^+$  ( $\text{M}+\text{H}$ ) $^+$  393.16806, found 393.16817.

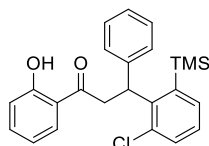

**3-(2-chloro-6-(trimethylsilyl)phenyl)-1-(2-hydroxyphenyl)-3-phenylpropan-1-one (89):**

Yield 95%; 38.7 mg; yellow solid; mp 140–143°C; TLC (PET:EtOAc, 100:1 v/v):  $R_f$  = 0.3;  $^1\text{H}$  NMR (600 MHz,  $\text{CDCl}_3$ )  $\delta$ =12.32 (s, 1H), 7.88 (d,  $J$  = 7.2 Hz, 1H), 7.48 (d,  $J$  = 6.6 Hz, 1H), 7.36 (s, 1H), 7.28 (d,  $J$  = 7.2 Hz, 1H), 7.19–7.04 (m, 4H), 6.94 (d,  $J$  = 6.0 Hz, 3H), 6.82 (d,  $J$  = 6.0 Hz, 1H), 5.44 (d,  $J$  = 9.0 Hz, 1H), 4.77 (dd,  $J$  = 18.6, 10.2 Hz, 1H), 3.36 (d,  $J$  = 18.6 Hz, 1H), 0.37 (s, 9H).  $^{13}\text{C}$  NMR (150 MHz,  $\text{CDCl}_3$ )  $\delta$ =204.2, 162.9, 147.3, 143.6, 142.0, 136.8, 135.6, 133.6, 132.9, 130.0, 128.3, 128.1, 127.4, 126.0, 119.5, 119.3, 118.9, 43.2, 41.6, 0.7. HRMS (ESI)  $m/z$  calcd for  $\text{C}_{24}\text{H}_{26}\text{ClO}_2\text{Si}^+$  ( $\text{M}+\text{H}$ ) $^+$  409.13851, found 409.13861.

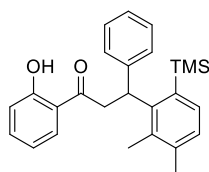

**3-(2,3-dimethyl-6-(trimethylsilyl)phenyl)-1-(2-hydroxyphenyl)-3-phenylpropan-1-one (90):**

Yield 97%; 39.0 mg; white solid; mp 190–193°C; TLC (PET:EtOAc, 100:1 v/v):  $R_f$  = 0.3;  $^1\text{H}$  NMR (600 MHz,  $\text{CDCl}_3$ )  $\delta$ =12.33 (s, 1H), 7.86 (d,  $J$  = 6.6 Hz, 1H), 7.44 (s, 1H), 7.37 (d,  $J$  = 5.4 Hz, 1H), 7.18 (s, 2H), 7.11 (d,  $J$  = 4.2 Hz, 2H), 6.98 (dd,  $J$  = 23.4, 6.6 Hz, 3H), 6.88 (s, 1H), 5.41 (d,  $J$  = 9.0 Hz, 1H), 4.36 (dd,  $J$  = 18.0, 10.2 Hz, 1H), 3.43 (d,  $J$  = 18.6 Hz, 1H), 2.21 (s, 3H), 1.87 (s, 3H), 0.33 (s, 9H).  $^{13}\text{C}$  NMR (150 MHz,  $\text{CDCl}_3$ )  $\delta$ =204.2, 162.7, 148.7, 143.6, 140.3, 138.2, 136.6, 135.8, 132.6, 129.7,

128.5, 128.3, 127.1, 125.7, 119.4, 119.1, 118.9, 43.5, 42.9, 21.0, 17.5, 0.8. HRMS (ESI)  $m/z$  calcd for  $C_{26}H_{30}O_2SiNa^+$  ( $M+Na$ )<sup>+</sup> 425.19073, found 425.19083.

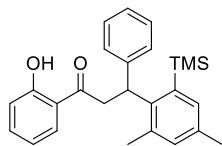

**3-(2,4-dimethyl-6-(trimethylsilyl)phenyl)-1-(2-hydroxyphenyl)-3-phenylpropan-1-one (91):**

Yield 94%; 37.8 mg; white solid; mp 201–204°C; TLC (PET:EtOAc, 100:1 v/v):  $R_f$  = 0.3; <sup>1</sup>H NMR (600 MHz,  $CDCl_3$ )  $\delta$ =12.34 (d,  $J$  = 1.2 Hz, 1H), 7.86 (d,  $J$  = 7.8 Hz, 1H), 7.41 (t,  $J$  = 7.8 Hz, 1H), 7.28 (s, 1H), 7.15 (t,  $J$  = 6.6 Hz, 2H), 7.12–7.07 (m, 1H), 7.01–6.93 (m, 4H), 6.86 (t,  $J$  = 7.2 Hz, 1H), 5.40 (d,  $J$  = 10.2 Hz, 1H), 4.38 (dd,  $J$  = 18.6, 10.2 Hz, 1H), 3.36 (d,  $J$  = 18.6 Hz, 1H), 2.31 (s, 3H), 1.90 (s, 3H), 0.36 (s, 9H). <sup>13</sup>C NMR (150 MHz,  $CDCl_3$ )  $\delta$ =204.2, 162.8, 145.8, 143.2, 140.5, 136.9, 136.7, 135.7, 134.9, 133.6, 129.7, 128.3, 127.3, 125.8, 119.5, 119.2, 42.9, 42.2, 21.5, 21.2, 0.9. HRMS (ESI)  $m/z$  calcd for  $C_{26}H_{30}O_2SiNa^+$  ( $M+Na$ )<sup>+</sup> 425.19073, found 425.19080.

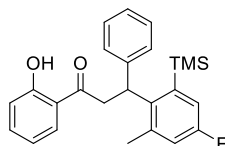

**3-(4-fluoro-2-methyl-6-(trimethylsilyl)phenyl)-1-(2-hydroxyphenyl)-3-phenylpropan-1-one (92):**

Yield 95%; 38.6 mg; yellow solid; mp 159–162°C; TLC (PET:EtOAc, 100:1 v/v):  $R_f$  = 0.3; <sup>1</sup>H NMR (600 MHz,  $CDCl_3$ )  $\delta$ =12.32 (s, 1H), 7.91 (d,  $J$  = 7.2 Hz, 1H), 7.44 (d,  $J$  = 6.6 Hz, 1H), 7.22–7.11 (m, 4H), 6.98 (dd,  $J$  = 21.6, 7.2 Hz, 3H), 6.90 (s, 1H), 6.82 (d,  $J$  = 8.4 Hz, 1H), 5.43 (d,  $J$  = 9.6 Hz, 1H), 4.41 (dd,  $J$  = 18.0, 10.2 Hz, 1H), 3.36 (d,  $J$  = 18.6 Hz, 1H), 1.94 (s, 3H), 0.37 (s, 9H). <sup>13</sup>C NMR (150 MHz,  $CDCl_3$ )  $\delta$ =203.9, 162.8, 162.2, 160.5, 144.4, 143.6, 142.7, 139.8, 139.7, 136.8, 129.7, 128.4, 127.2, 126.0, 120.1, 120.0, 119.4, 119.2, 118.9, 118.8, 118.7, 42.5, 42.0, 21.5, 0.5. HRMS (ESI)  $m/z$  calcd for  $C_{25}H_{27}FO_2SiNa^+$  ( $M+Na$ )<sup>+</sup> 429.16566, found 429.16576.

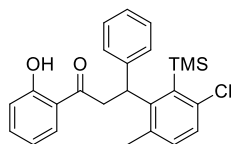

**3-(3-chloro-6-methyl-2-(trimethylsilyl)phenyl)-1-(2-hydroxyphenyl)-3-phenylpropan-1-one (93):**

Yield 78%; 32.9 mg; yellow solid; mp 133–136°C; TLC (PET:EtOAc, 100:1 v/v):  $R_f$  = 0.3; <sup>1</sup>H NMR (600 MHz,  $CDCl_3$ )  $\delta$ =12.26 (s, 1H), 7.78 (d,  $J$  = 6.0 Hz, 1H), 7.47 (s, 1H), 7.23 (d,  $J$  = 17.4 Hz, 2H), 7.17 (d,  $J$  = 5.4 Hz, 2H), 7.01 (s, 4H), 6.89 (s, 1H), 5.62 (s, 1H), 4.14 (dd,  $J$  = 16.8, 6.6 Hz, 1H), 3.50 (d,  $J$  = 15.6 Hz, 1H), 1.97 (s, 3H), 0.48 (s, 9H). <sup>13</sup>C NMR (150 MHz,  $CDCl_3$ )  $\delta$ =204.2, 162.6, 150.0, 142.9, 139.6, 139.4,

136.6, 135.6, 134.5, 129.6, 128.8, 128.4, 126.9, 125.9, 119.2, 119.0, 118.8, 42.6, 42.5, 21.4, 3.7. HRMS (ESI)  $m/z$  calcd for  $C_{25}H_{27}ClO_2SiNa^+$  ( $M+Na$ )<sup>+</sup> 445.13611, found 445.13620.

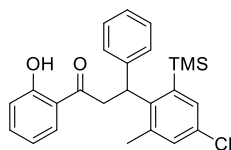

**3-(4-chloro-2-methyl-6-(trimethylsilyl)phenyl)-1-(2-hydroxyphenyl)-3-phenylpropan-1-one (94):**

Yield 90%; 38.0 mg; yellow solid; mp 201–204°C; TLC (PET:EtOAc, 100:1 v/v):  $R_f$  = 0.3; <sup>1</sup>H NMR (600 MHz,  $CDCl_3$ )  $\delta$ =12.29 (s, 1H), 7.91 (d,  $J$  = 7.2 Hz, 1H), 7.47 (d,  $J$  = 6.6 Hz, 1H), 7.42 (s, 1H), 7.19 (d,  $J$  = 6.0 Hz, 2H), 7.14 (d,  $J$  = 13.2 Hz, 2H), 7.02 (d,  $J$  = 7.8 Hz, 1H), 6.98–6.91 (m, 3H), 5.41 (d,  $J$  = 9.6 Hz, 1H), 4.39 (dd,  $J$  = 18.6, 10.2 Hz, 1H), 3.35 (d,  $J$  = 18.6 Hz, 1H), 1.92 (s, 3H), 0.38 (s, 9H). <sup>13</sup>C NMR (150 MHz,  $CDCl_3$ )  $\delta$ =203.6, 162.7, 147.0, 143.3, 142.3, 139.2, 136.8, 133.3, 132.5, 132.3, 129.6, 128.4, 127.1, 126.0, 119.3, 119.2, 118.9, 42.6, 41.8, 21.3, 0.5. HRMS (ESI)  $m/z$  calcd for  $C_{25}H_{27}ClO_2SiNa^+$  ( $M+Na$ )<sup>+</sup> 445.13611, found 445.13581.

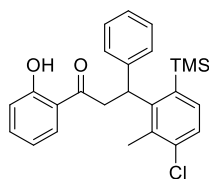

**3-(3-chloro-2-methyl-6-(trimethylsilyl)phenyl)-1-(2-hydroxyphenyl)-3-phenylpropan-1-one (95):**

Yield 97%; 40.9 mg; yellow solid; mp 190–193°C; TLC (PET:EtOAc, 100:1 v/v):  $R_f$  = 0.3; <sup>1</sup>H NMR (600 MHz,  $CDCl_3$ )  $\delta$ =12.03 (s, 1H), 7.61 (d,  $J$  = 7.8 Hz, 1H), 7.20 (t,  $J$  = 7.8 Hz, 1H), 7.12 (d,  $J$  = 7.8 Hz, 1H), 7.05 (d,  $J$  = 7.8 Hz, 1H), 6.94 (t,  $J$  = 7.2 Hz, 2H), 6.91–6.86 (m, 1H), 6.76 (d,  $J$  = 8.4 Hz, 1H), 6.68 (d,  $J$  = 7.8 Hz, 2H), 6.64 (t,  $J$  = 7.8 Hz, 1H), 5.19 (d,  $J$  = 9.6 Hz, 1H), 4.09 (dd,  $J$  = 18.6, 10.2 Hz, 1H), 3.14 (d,  $J$  = 18.6 Hz, 1H), 1.76 (s, 3H), 0.08 (s, 9H). <sup>13</sup>C NMR (150 MHz,  $CDCl_3$ )  $\delta$ =203.6, 162.7, 150.7, 142.6, 139.6, 138.5, 136.7, 135.0, 133.5, 129.6, 128.4, 127.5, 126.9, 126.0, 119.2, 119.2, 118.9, 43.6, 42.4, 18.2, 0.5. HRMS (ESI)  $m/z$  calcd for  $C_{25}H_{27}ClO_2SiNa^+$  ( $M+Na$ )<sup>+</sup> 445.13611, found 445.13581.

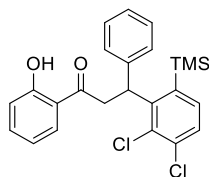

**3-(2,3-dichloro-6-(trimethylsilyl)phenyl)-1-(2-hydroxyphenyl)-3-phenylpropan-1-one (96):**

Yield 41%; 18.2 mg; yellow solid; mp 147–150°C; TLC (PET:EtOAc, 100:1 v/v):  $R_f$  = 0.3;  $^1\text{H}$  NMR (600 MHz,  $\text{CDCl}_3$ )  $\delta$ =12.27 (s, 1H), 7.91 (d,  $J$  = 7.8 Hz, 1H), 7.46–7.38 (m, 2H), 7.36 (d,  $J$  = 7.8 Hz, 1H), 7.17 (t,  $J$  = 7.2 Hz, 2H), 7.14–7.09 (m, 1H), 6.98 (d,  $J$  = 8.4 Hz, 1H), 6.94 (d,  $J$  = 7.8 Hz, 2H), 6.87 (t,  $J$  = 7.2 Hz, 1H), 5.48 (d,  $J$  = 9.6 Hz, 1H), 4.80 (dd,  $J$  = 19.2, 10.2 Hz, 1H), 3.35 (d,  $J$  = 18.6 Hz, 1H), 0.37 (s, 9H).  $^{13}\text{C}$  NMR (150 MHz,  $\text{CDCl}_3$ )  $\delta$ =203.8, 162.7, 149.6, 141.8, 141.3, 136.8, 136.1, 133.8, 133.5, 129.8, 128.7, 128.3, 127.1, 126.0, 119.3, 118.8, 43.7, 41.1, 0.4. HRMS (ESI)  $m/z$  calcd for  $\text{C}_{24}\text{H}_{24}\text{Cl}_2\text{O}_2\text{SiNa}^+$  ( $\text{M}+\text{Na}$ ) $^+$  465.08148, found 465.08157.

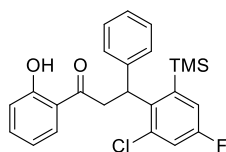

**3-(2-chloro-4-fluoro-6-(trimethylsilyl)phenyl)-1-(2-hydroxyphenyl)-3-phenylpropan-1-one (97):**

Yield 88%; 37.5 mg; yellow solid; mp 147–150°C; TLC (PET:EtOAc, 100:1 v/v):  $R_f$  = 0.3;  $^1\text{H}$  NMR (600 MHz,  $\text{CDCl}_3$ )  $\delta$ =12.26 (s, 1H), 7.94 (d,  $J$  = 7.2 Hz, 1H), 7.47 (s, 1H), 7.25–7.17 (m, 3H), 7.14 (d,  $J$  = 5.4 Hz, 1H), 7.07 (d,  $J$  = 7.2 Hz, 1H), 7.01 (d,  $J$  = 7.2 Hz, 1H), 6.92 (s, 3H), 5.41 (d,  $J$  = 9.0 Hz, 1H), 4.75 (dd,  $J$  = 18.6, 10.2 Hz, 1H), 3.35 (d,  $J$  = 18.6 Hz, 1H), 0.38 (s, 9H).  $^{13}\text{C}$  NMR (150 MHz,  $\text{CDCl}_3$ )  $\delta$ =203.8, 162.7, 161.8, 160.1, 145.6, 143.0, 141.5, 136.7, 135.9, 135.8, 129.8, 128.2, 127.1, 125.9, 120.0, 120.1, 119.6, 119.4, 119.3, 119.2, 118.8, 42.2, 41.4, 0.2. HRMS (ESI)  $m/z$  calcd for  $\text{C}_{24}\text{H}_{25}\text{ClFO}_2\text{Si}^+$  ( $\text{M}+\text{H}$ ) $^+$  427.12909, found 427.12919.

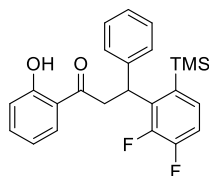

**3-(2,3-difluoro-6-(trimethylsilyl)phenyl)-1-(2-hydroxyphenyl)-3-phenylpropan-1-one (98):**

Yield 75%; 30.7 mg; yellow solid; mp 131–134°C; TLC (PET:EtOAc, 100:1 v/v):  $R_f$  = 0.3;  $^1\text{H}$  NMR (600 MHz,  $\text{CDCl}_3$ )  $\delta$ =12.23 (s, 1H), 7.90 (d,  $J$  = 7.8 Hz, 1H), 7.48 (t,  $J$  = 7.8 Hz, 1H), 7.29–7.25 (m, 1H), 7.25–7.21 (m, 2H), 7.19–7.15 (m, 1H), 7.07 (d,  $J$  = 7.8 Hz, 3H), 7.00 (d,  $J$  = 8.4 Hz, 1H), 6.92 (t,  $J$  = 7.8 Hz, 1H), 5.27 (d,  $J$  = 8.4 Hz, 1H), 4.37 (dd,  $J$  = 18.0, 9.6 Hz, 1H), 3.44 (d,  $J$  = 18.6 Hz, 1H), 0.37 (s, 9H).  $^{13}\text{C}$  NMR (150 MHz,  $\text{CDCl}_3$ )  $\delta$ =203.6, 162.6, 152.8, 151.0, 149.3, 141.5, 138.9, 136.6, 136.5, 130.5, 129.7, 128.3, 127.0, 126.3, 119.2, 119.1, 118.6, 115.5, 115.4, 42.1, 41.0, 0.4.  $^{19}\text{F}$  NMR (375 MHz,  $\text{CDCl}_3$ )  $\delta$ =136.43, 136.48, 137.51, 137.56. HRMS (ESI)  $m/z$  calcd for  $\text{C}_{24}\text{H}_{25}\text{F}_2\text{O}_2\text{Si}^+$  ( $\text{M}+\text{H}$ ) $^+$  411.15864, found 411.15874.

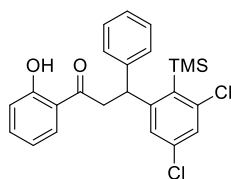

**3-(3,5-dichloro-2-(trimethylsilyl)phenyl)-1-(2-hydroxyphenyl)-3-phenylpropan-1-one (99):**

Yield 77%; 34.0 mg; yellow oil; TLC (PET:EtOAc, 100:1 v/v):  $R_f = 0.3$ ;  $^1\text{H NMR}$  (600 MHz,  $\text{CDCl}_3$ )  $\delta=12.11$  (s, 1H), 7.83 (d,  $J = 7.8$  Hz, 1H), 7.48 (s, 1H), 7.29 (t,  $J = 7.8$  Hz, 2H), 7.22 (d,  $J = 5.4$  Hz, 2H), 7.09 (d,  $J = 7.8$  Hz, 2H), 7.00–6.95 (m, 2H), 6.92 (t,  $J = 7.8$  Hz, 1H), 5.40 (t,  $J = 7.2$  Hz, 1H), 3.87 (dd,  $J = 18.0, 7.8$  Hz, 1H), 3.53 (dd,  $J = 18.0, 6.6$  Hz, 1H), 0.53 (s, 9H).  $^{13}\text{C NMR}$  (150 MHz,  $\text{CDCl}_3$ )  $\delta=202.9, 162.3, 153.5, 142.6, 142.3, 136.5, 135.9, 135.3, 129.5, 128.6, 128.1, 127.3, 126.9, 126.4, 126.2, 118.9, 118.5, 44.6, 42.2, 3.2$ . HRMS (ESI)  $m/z$  calcd for  $\text{C}_{24}\text{H}_{25}\text{Cl}_2\text{O}_2\text{Si} + (\text{M} + \text{H})^+$  443.09954, found 443.09985.

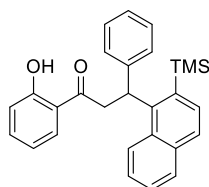

**1-(2-hydroxyphenyl)-3-phenyl-3-(2-(trimethylsilyl)naphthalen-1-yl)propan-1-one (100):**

Yield 91%; 38.6 mg; yellow solid; mp 231–234°C; TLC (PET:EtOAc, 100:1 v/v):  $R_f = 0.3$ ;  $^1\text{H NMR}$  (600 MHz,  $\text{CDCl}_3$ )  $\delta=12.34$  (d,  $J = 7.8$  Hz, 1H), 7.83–7.71 (m, 3H), 7.67 (d,  $J = 7.2$  Hz, 1H), 7.60 (d,  $J = 8.4$  Hz, 1H), 7.43 (d,  $J = 7.2$  Hz, 1H), 7.34 (d,  $J = 6.6$  Hz, 1H), 7.22–7.16 (m, 3H), 7.12 (d,  $J = 6.0$  Hz, 1H), 7.05 (d,  $J = 6.6$  Hz, 2H), 7.01 (d,  $J = 7.8$  Hz, 1H), 6.80 (d,  $J = 6.6$  Hz, 1H), 5.73 (d,  $J = 9.0$  Hz, 1H), 4.62 (dd,  $J = 18.0, 9.6$  Hz, 1H), 3.49 (d,  $J = 18.6$  Hz, 1H), 0.42 (d,  $J = 7.2$  Hz, 9H).  $^{13}\text{C NMR}$  (150 MHz,  $\text{CDCl}_3$ )  $\delta=204.0, 162.6, 147.2, 143.5, 138.0, 136.6, 135.6, 131.5, 131.0, 129.7, 129.0, 128.4, 127.1, 127.0, 126.6, 125.9, 125.6, 125.4, 119.3, 119.1, 118.7, 44.0, 43.4, 0.6$ . HRMS (ESI)  $m/z$  calcd for  $\text{C}_{28}\text{H}_{28}\text{O}_2\text{SiNa} + (\text{M} + \text{Na})^+$  447.17508, found 447.17515.

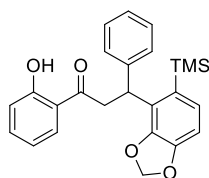

**1-(2-hydroxyphenyl)-3-phenyl-3-(5-(trimethylsilyl)benzo[d][1,3]dioxol-4-yl)propan-1-one (101):**

Yield 48%; 20.1 mg; white solid; mp 96–98 °C; TLC (PET:EtOAc, 100:1 v/v):  $R_f = 0.3$ ;  $^1\text{H NMR}$  (600 MHz,  $\text{CDCl}_3$ )  $\delta=12.32$  (s, 1H), 7.83 (d,  $J = 6.6$  Hz, 1H), 7.38 (s, 1H), 7.17 (dd,  $J = 32.4, 15.6$  Hz, 5H), 7.05 (d,  $J = 6.6$  Hz, 1H), 6.93 (d,  $J = 7.8$  Hz,

1H), 6.82 (s, 1H), 6.74 (d,  $J = 6.6$  Hz, 1H), 5.73 (d,  $J = 13.2$  Hz, 2H), 5.14 (s, 1H), 4.07 (dd,  $J = 17.4, 7.2$  Hz, 1H), 3.78–3.70 (m, 1H), 0.31 (s, 9H).  $^{13}\text{C}$  NMR (150 MHz,  $\text{CDCl}_3$ )  $\delta$ =204.5, 162.7, 149.0, 146.2, 142.6, 136.5, 132.6, 130.3, 130.0, 129.2, 128.4, 127.7, 126.3, 119.5, 119.0, 118.6, 107.4, 100.3, 42.9, 41.8, 1.0. HRMS (ESI)  $m/z$  calcd for  $\text{C}_{25}\text{H}_{26}\text{O}_4\text{SiNa}^+$  ( $\text{M}+\text{Na}$ ) $^+$  441.14926, found 441.14935.

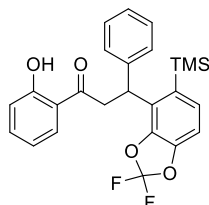

**3-(2,2-difluoro-5-(trimethylsilyl)benzo[d][1,3]dioxol-4-yl)-1-(2-hydroxyphenyl)-3-phenylpropan-1-one (102):**

Yield 35%; 15.9 mg; yellow solid; mp 120–123°C; TLC (PET:EtOAc, 100:1 v/v):  $R_f = 0.3$ ;  $^1\text{H}$  NMR (600 MHz,  $\text{CDCl}_3$ )  $\delta$ =12.31 (s, 1H), 7.93 (d,  $J = 7.8$  Hz, 1H), 7.56–7.51 (m, 1H), 7.41–7.32 (m, 3H), 7.27 (dd,  $J = 12.6, 5.4$  Hz, 1H), 7.22 (d,  $J = 7.8$  Hz, 2H), 7.04 (dt,  $J = 16.8, 8.4$  Hz, 2H), 6.98 (t,  $J = 7.8$  Hz, 1H), 5.37–5.29 (m, 1H), 4.15 (dd,  $J = 18.0, 8.4$  Hz, 1H), 3.83 (dd,  $J = 18.0, 5.4$  Hz, 1H), 0.43 (s, 9H).  $^{13}\text{C}$  NMR (150 MHz,  $\text{CDCl}_3$ )  $\delta$ =203.6, 162.5, 144.9, 142.7, 141.3, 136.6, 135.4, 131.2, 130.6, 129.8, 129.6, 129.0, 128.5, 127.4, 126.6, 119.3, 119.1, 118.5, 107.9, 42.7, 41.4, 0.7.  $^{19}\text{F}$  NMR (375 MHz,  $\text{CDCl}_3$ )  $\delta$ =49.99. HRMS (ESI)  $m/z$  calcd for  $\text{C}_{25}\text{H}_{24}\text{F}_2\text{O}_4\text{SiNa}^+$  ( $\text{M}+\text{Na}$ ) $^+$  477.13041, found 477.13051.

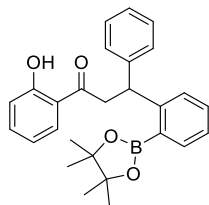

**1-(2-hydroxyphenyl)-3-phenyl-3-(2-(4,4,5,5-tetramethyl-1,3,2-dioxaborolan-2-yl)phenyl)propan-1-one (103):**

Yield 84%; 36.0 mg; white solid; mp 118–121°C; TLC (PET:EtOAc, 100:1 v/v):  $R_f = 0.3$ ;  $^1\text{H}$  NMR (600 MHz,  $\text{CDCl}_3$ )  $\delta$ =12.26 (s, 1H), 7.80 (t,  $J = 8.4$  Hz, 2H), 7.41 (t,  $J = 7.8$  Hz, 1H), 7.31 (dd,  $J = 19.2, 7.8$  Hz, 3H), 7.26 (t,  $J = 7.8$  Hz, 2H), 7.17 (t,  $J = 8.4$  Hz, 3H), 6.93 (d,  $J = 8.4$  Hz, 1H), 6.84 (t,  $J = 7.8$  Hz, 1H), 5.67 (t,  $J = 7.2$  Hz, 1H), 3.80 (dd,  $J = 16.8, 7.8$  Hz, 1H), 3.68 (dd,  $J = 16.8, 6.6$  Hz, 1H), 1.29 (s, 6H), 1.24 (s, 6H).  $^{13}\text{C}$  NMR (150 MHz,  $\text{CDCl}_3$ )  $\delta$ =204.3, 162.4, 150.5, 144.2, 136.2, 136.1, 131.1, 129.9, 128.4, 128.1, 127.8, 127.2, 126.1, 125.6, 119.5, 118.8, 118.5, 83.7, 45.1, 43.3, 24.8. HRMS (ESI)  $m/z$  calcd for  $\text{C}_{27}\text{H}_{30}\text{BO}_4^+$  ( $\text{M}+\text{H}$ ) $^+$  429.22317, found 429.22372.

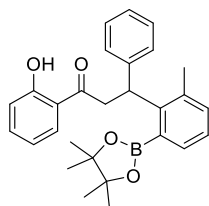

**1-(2-hydroxyphenyl)-3-(2-methyl-6-(4,4,5,5-tetramethyl-1,3,2-dioxaborolan-2-yl)phenyl)-3-phenylpropan-1-one (104):**

Yield 87%; 38.5 mg; colorless oil; TLC (PET:EtOAc, 100:1 v/v):  $R_f = 0.3$ ;  $^1\text{H NMR}$  (600 MHz,  $\text{CDCl}_3$ )  $\delta=12.41$  (s, 1H), 7.84 (d,  $J = 7.8$  Hz, 1H), 7.60 (d,  $J = 6.6$  Hz, 1H), 7.39 (t,  $J = 7.8$  Hz, 1H), 7.18 (t,  $J = 7.2$  Hz, 2H), 7.16–7.10 (m, 3H), 7.08 (d,  $J = 7.8$  Hz, 2H), 6.95 (d,  $J = 8.4$  Hz, 1H), 6.84 (t,  $J = 7.2$  Hz, 1H), 5.64 (s, 1H), 4.36–4.27 (m, 1H), 3.59 (dd,  $J = 17.4, 4.2$  Hz, 1H), 2.14 (s, 3H), 1.17 (d,  $J = 9.0$  Hz, 12H).  $^{13}\text{C NMR}$  (150 MHz,  $\text{CDCl}_3$ )  $\delta=205.2, 162.6, 148.1, 143.7, 136.6, 136.2, 134.0, 133.6, 130.0, 128.0, 127.6, 126.1, 125.5, 119.6, 118.8, 118.5, 83.7, 41.7, 41.5, 24.9, 24.5, 21.3$ . HRMS (ESI)  $m/z$  calcd for  $\text{C}_{28}\text{H}_{32}\text{BO}_4^+$  ( $\text{M}+\text{H}$ ) $^+$  443.23882, found 443.23932.

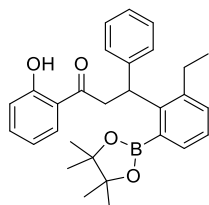

**3-(2-ethyl-6-(4,4,5,5-tetramethyl-1,3,2-dioxaborolan-2-yl)phenyl)-1-(2-hydroxyphenyl)-3-phenylpropan-1-one (105):**

Yield 62%; 28.3 mg; white solid; mp 105–108 °C; TLC (PET:EtOAc, 100:1 v/v):  $R_f = 0.3$ ;  $^1\text{H NMR}$  (600 MHz,  $\text{CDCl}_3$ )  $\delta=12.43$  (s, 1H), 7.89 (d,  $J = 7.8$  Hz, 1H), 7.59 (d,  $J = 7.2$  Hz, 1H), 7.43 (t,  $J = 7.8$  Hz, 1H), 7.25 (d,  $J = 7.8$  Hz, 1H), 7.19 (dd,  $J = 12.6, 7.2$  Hz, 3H), 7.10 (t,  $J = 7.2$  Hz, 1H), 7.05 (d,  $J = 4.8$  Hz, 2H), 6.98 (d,  $J = 8.4$  Hz, 1H), 6.87 (t,  $J = 7.8$  Hz, 1H), 5.60 (s, 1H), 4.51 (s, 1H), 3.50 (d,  $J = 18.0$  Hz, 1H), 2.62 (d,  $J = 57.0$  Hz, 2H), 1.13 (d,  $J = 22.2$  Hz, 12H), 0.98 (s, 3H).  $^{13}\text{C NMR}$  (150 MHz,  $\text{CDCl}_3$ )  $\delta=205.1, 162.5, 147.5, 144.2, 142.5, 136.1, 133.5, 132.1, 129.8, 127.9, 127.7, 126.2, 125.4, 119.5, 118.8, 118.4, 83.6, 42.8, 40.5, 26.8, 24.9, 24.4, 15.4$ . HRMS (ESI)  $m/z$  calcd for  $\text{C}_{29}\text{H}_{34}\text{BO}_4^+$  ( $\text{M}+\text{H}$ ) $^+$  457.25447, found 457.25491.

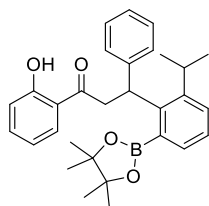

**1-(2-hydroxyphenyl)-3-(2-isopropyl-6-(4,4,5,5-tetramethyl-1,3,2-dioxaborolan-2-yl)phenyl)-3-phenylpropan-1-one (106):**

Yield 75%; 35.2 mg; white solid; mp 130–133 °C; TLC (PET:EtOAc, 100:1 v/v):  $R_f = 0.3$ ;  $^1\text{H NMR}$  (600 MHz,  $\text{CDCl}_3$ )  $\delta=12.43$  (s, 1H), 7.86 (d,  $J = 6.6$  Hz, 1H), 7.59 (d,  $J = 7.2$  Hz, 1H), 7.42 (t,  $J = 7.8$  Hz, 1H), 7.34 (d,  $J = 7.2$  Hz, 1H), 7.24 (t,  $J = 7.8$  Hz, 1H), 7.19 (t,  $J = 7.2$  Hz, 2H), 7.16–7.00 (m, 3H), 6.97 (d,  $J = 8.4$  Hz, 1H), 6.86 (t,  $J = 7.2$  Hz, 1H), 5.72 (s, 1H), 4.34 (s, 1H), 3.55 (d,  $J = 15.0$  Hz, 1H), 3.09 (s, 1H), 1.41–0.98 (m, 15H), 0.69 (s, 3H).  $^{13}\text{C NMR}$  (150 MHz,  $\text{CDCl}_3$ )  $\delta=204.9, 162.7, 147.4, 146.9, 144.4, 136.3, 133.2, 131.5, 129.9, 128.1, 127.6, 126.6, 125.5, 119.6, 119.0, 118.6, 83.8, 42.6, 29.5, 25.0, 24.7, 24.6, 23.1$ . HRMS (ESI)  $m/z$  calcd for  $\text{C}_{30}\text{H}_{36}\text{BO}_4^+$  ( $\text{M}+\text{H}$ ) $^+$  471.27012, found 471.27084.

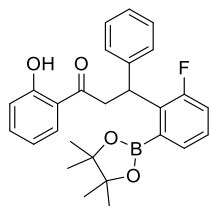

**3-(2-fluoro-6-(4,4,5,5-tetramethyl-1,3,2-dioxaborolan-2-yl)phenyl)-1-(2-hydroxyphenyl)-3-phenylpropan-1-one (107):**

Yield 81%; 36.1 mg; yellow oil; TLC (PET:EtOAc, 100:1 v/v):  $R_f = 0.3$ ;  $^1\text{H}$  NMR (600 MHz,  $\text{CDCl}_3$ )  $\delta=12.27$  (s, 1H), 7.82 (d,  $J = 7.8$  Hz, 1H), 7.55 (d,  $J = 7.2$  Hz, 1H), 7.46–7.33 (m, 3H), 7.25 (t,  $J = 7.8$  Hz, 2H), 7.15 (dd,  $J = 13.2, 7.2$  Hz, 2H), 6.98 (dd,  $J = 11.4, 8.4$  Hz, 1H), 6.91 (d,  $J = 8.4$  Hz, 1H), 6.83 (t,  $J = 7.8$  Hz, 1H), 5.74 (t,  $J = 7.2$  Hz, 1H), 3.97 (dd,  $J = 16.8, 6.6$  Hz, 1H), 3.89 (dd,  $J = 16.8, 7.8$  Hz, 1H), 1.33 (d,  $J = 9.0$  Hz, 12H).  $^{13}\text{C}$  NMR (150 MHz,  $\text{CDCl}_3$ )  $\delta=204.8, 162.5, 162.5, 160.9, 143.1, 136.2, 136.2, 131.6, 131.6, 130.0, 128.2, 127.9, 127.9, 127.8, 127.8, 126.1, 119.6, 118.9, 118.9, 118.8, 118.4, 84.2, 41.5, 41.4, 40.4, 24.9$ . HRMS (ESI)  $m/z$  calcd for  $\text{C}_{27}\text{H}_{29}\text{BFO}_4^+$  ( $\text{M}+\text{H}$ ) $^+$  447.21374, found 447.21402.

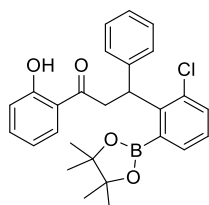

**3-(2-chloro-6-(4,4,5,5-tetramethyl-1,3,2-dioxaborolan-2-yl)phenyl)-1-(2-hydroxyphenyl)-3-phenylpropan-1-one (108):**

Yield 83%; 38.4 mg; white solid; mp 88–91°C; TLC (PET:EtOAc, 100:1 v/v):  $R_f = 0.3$ ;  $^1\text{H}$  NMR (600 MHz,  $\text{CDCl}_3$ )  $\delta=12.34$  (s, 1H), 7.88 (dd,  $J = 7.8, 1.2$  Hz, 1H), 7.65 (dd,  $J = 7.2, 1.2$  Hz, 1H), 7.48–7.35 (m, 1H), 7.34 (d,  $J = 7.8$  Hz, 1H), 7.23 (t,  $J = 7.8$  Hz, 2H), 7.19–7.12 (m, 4H), 6.95 (d,  $J = 8.4$  Hz, 1H), 6.87 (t,  $J = 7.8$  Hz, 1H), 5.87 (t,  $J = 6.6$  Hz, 1H), 4.34 (d,  $J = 10.8$  Hz, 1H), 3.81 (d,  $J = 13.2$  Hz, 1H), 1.25 (d,  $J = 10.8$  Hz, 12H).  $^{13}\text{C}$  NMR (150 MHz,  $\text{CDCl}_3$ )  $\delta=204.8, 162.5, 146.4, 142.3, 136.3, 134.8, 134.0, 133.2, 130.0, 127.9, 127.5, 125.7, 119.6, 118.9, 118.5, 84.2, 42.0, 40.2, 24.9, 24.7$ . HRMS (ESI)  $m/z$  calcd for  $\text{C}_{27}\text{H}_{29}\text{BClO}_4^+$  ( $\text{M}+\text{H}$ ) $^+$  463.18419, found 463.18442.

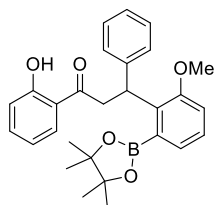

**1-(2-hydroxyphenyl)-3-(2-methoxy-6-(4,4,5,5-tetramethyl-1,3,2-dioxaborolan-2-yl)phenyl)-3-phenylpropan-1-one (109):**

Yield 89%; 40.8 mg; white solid; mp 147–150°C; TLC (PET:EtOAc, 50:1 v/v):  $R_f = 0.3$ ;  $^1\text{H}$  NMR (400 MHz,  $\text{CDCl}_3$ )  $\delta=12.40$  (s, 1H), 7.82 (dd,  $J = 8.0, 1.6$  Hz, 1H), 7.38–7.32 (m, 4H), 7.21 (t,  $J = 7.6$  Hz, 2H), 7.17–7.13 (m, 1H), 7.09 (t,  $J = 7.2$  Hz,



1H), 6.89 (d,  $J = 8.4$  Hz, 1H), 6.84–6.77 (m, 2H), 5.65 (t,  $J = 7.2$  Hz, 1H), 4.05 (dd,  $J = 16.8, 6.8$  Hz, 1H), 3.88 (dd,  $J = 16.8, 7.6$  Hz, 1H), 3.49 (s, 3H), 1.30 (t,  $J = 6.8$  Hz, 12H).  $^{13}\text{C}$  NMR (100 MHz,  $\text{CDCl}_3$ )  $\delta = 206.0, 162.6, 158.0, 144.1, 137.9, 136.1, 130.3, 128.0, 127.9, 127.8, 127.5, 125.5, 119.9, 118.8, 118.4, 114.9, 84.0, 55.4, 41.5, 40.8, 25.0, 24.9$ . HRMS (ESI)  $m/z$  calcd for  $\text{C}_{28}\text{H}_{32}\text{BO}_5^+$  ( $\text{M}+\text{H}$ ) $^+$  459.23373, found 459.23413.

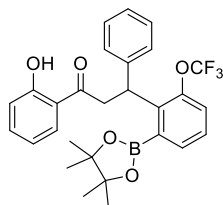

**1-(2-hydroxyphenyl)-3-phenyl-3-(2-(4,4,5,5-tetramethyl-1,3,2-dioxaborolan-2-yl)-6-(trifluoromethoxy)phenyl)propan-1-one (110):**

Yield 62%; 31.8 mg; white solid; mp 115–118°C; TLC (PET:EtOAc, 100:1 v/v):  $R_f = 0.3$ ;  $^1\text{H}$  NMR (600 MHz,  $\text{CDCl}_3$ )  $\delta = 12.28$  (s, 1H), 7.86 (d,  $J = 7.8$  Hz, 1H), 7.70–7.62 (m, 1H), 7.44 (t,  $J = 7.8$  Hz, 1H), 7.33–7.19 (m, 6H), 7.15 (t,  $J = 7.2$  Hz, 1H), 6.95 (d,  $J = 8.4$  Hz, 1H), 6.89 (t,  $J = 7.8$  Hz, 1H), 5.78 (t,  $J = 7.2$  Hz, 1H), 4.18 (dd,  $J = 17.4, 7.2$  Hz, 1H), 3.73 (dd,  $J = 17.4, 6.6$  Hz, 1H), 1.30 (s, 12H).  $^{13}\text{C}$  NMR (150 MHz,  $\text{CDCl}_3$ )  $\delta = 204.5, 162.5, 148.5, 142.4, 140.6, 136.2, 133.3, 129.8, 128.0, 127.6, 125.9, 121.4, 121.2, 119.5, 118.9, 118.5, 84.3, 40.5, 39.9, 24.8, 24.7$ . HRMS (ESI)  $m/z$  calcd for  $\text{C}_{28}\text{H}_{29}\text{BF}_3\text{O}_5^+$  ( $\text{M}+\text{H}$ ) $^+$  513.20547, found 513.20569.

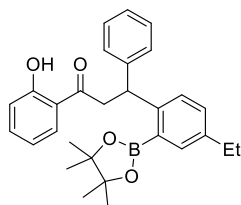

**3-(4-ethyl-2-(4,4,5,5-tetramethyl-1,3,2-dioxaborolan-2-yl)phenyl)-1-(2-hydroxyphenyl)-3-phenylpropan-1-one (111):**

Yield 68%; 31.0 mg; white solid; mp 137–140°C; TLC (PET:EtOAc, 100:1 v/v):  $R_f = 0.3$ ;  $^1\text{H}$  NMR (600 MHz,  $\text{CDCl}_3$ )  $\delta = 12.28$  (s, 1H), 7.80 (d,  $J = 7.8$  Hz, 1H), 7.62 (s, 1H), 7.40 (t,  $J = 7.8$  Hz, 1H), 7.29 (d,  $J = 7.8$  Hz, 2H), 7.24 (t,  $J = 7.8$  Hz, 2H), 7.15 (dd,  $J = 15.6, 7.8$  Hz, 2H), 7.09 (d,  $J = 7.8$  Hz, 1H), 6.92 (d,  $J = 8.4$  Hz, 1H), 6.83 (t,  $J = 7.8$  Hz, 1H), 5.64 (t,  $J = 7.2$  Hz, 1H), 3.78 (dd,  $J = 16.8, 8.4$  Hz, 1H), 3.67 (dd,  $J = 16.8, 6.6$  Hz, 1H), 2.59 (dd,  $J = 15.0, 7.8$  Hz, 2H), 1.27 (d,  $J = 30.0$  Hz, 12H), 1.19 (t,  $J = 7.8$  Hz, 3H).  $^{13}\text{C}$  NMR (150 MHz,  $\text{CDCl}_3$ )  $\delta = 204.4, 162.4, 147.8, 144.4, 141.2, 136.1, 135.7, 130.6, 129.9, 128.4, 128.1, 127.3, 126.1, 119.5, 118.8, 118.5, 83.7, 45.2, 43.0, 28.3, 24.8, 15.6$ . HRMS (ESI)  $m/z$  calcd for  $\text{C}_{29}\text{H}_{34}\text{BO}_4^+$  ( $\text{M}+\text{H}$ ) $^+$  457.25447, found 457.25497.

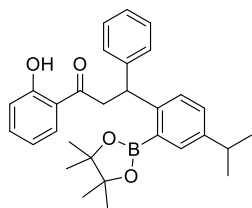

**1-(2-hydroxyphenyl)-3-(4-isopropyl-2-(4,4,5,5-tetramethyl-1,3,2-dioxaborolan-2-yl)phenyl)-3-phenylpropan-1-one (112):**

Yield 86%; 40.4 mg; white solid; mp 147–150°C; TLC (PET:EtOAc, 100:1 v/v):  $R_f$  = 0.3;  $^1\text{H}$  NMR (600 MHz,  $\text{CDCl}_3$ )  $\delta$ =12.27 (s, 1H), 7.80 (d,  $J$  = 7.8 Hz, 1H), 7.62 (s, 1H), 7.41 (t,  $J$  = 7.2 Hz, 1H), 7.29 (d,  $J$  = 7.2 Hz, 2H), 7.25 (t,  $J$  = 7.2 Hz, 2H), 7.21–7.18 (m, 1H), 7.15 (d,  $J$  = 6.6 Hz, 1H), 7.09 (d,  $J$  = 7.8 Hz, 1H), 6.93 (d,  $J$  = 8.4 Hz, 1H), 6.84 (t,  $J$  = 7.2 Hz, 1H), 5.63 (s, 1H), 3.79 (dd,  $J$  = 16.8, 8.4 Hz, 1H), 3.67 (dd,  $J$  = 16.8, 6.0 Hz, 1H), 2.90–2.83 (m, 1H), 1.30 (s, 6H), 1.25 (s, 6H), 1.21 (d,  $J$  = 3.0 Hz, 6H).  $^{13}\text{C}$  NMR (150 MHz,  $\text{CDCl}_3$ )  $\delta$ =204.3, 162.3, 147.8, 145.7, 144.3, 135.9, 134.3, 129.8, 128.9, 128.2, 128.0, 127.2, 126.0, 119.4, 118.7, 118.3, 83.6, 45.2, 43.0, 33.5, 24.8, 24.7, 23.9. HRMS (ESI)  $m/z$  calcd for  $\text{C}_{30}\text{H}_{36}\text{BO}_4^+$  ( $\text{M}+\text{H}$ ) $^+$  471.27012, found 471.27045.

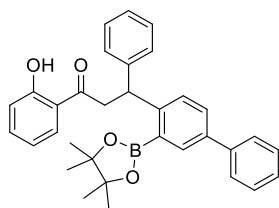

**1-(2-hydroxyphenyl)-3-phenyl-3-(3-(4,4,5,5-tetramethyl-1,3,2-dioxaborolan-2-yl)-[1,1'-biphenyl]-4-yl)propan-1-one (113):**

Yield 80%; 40.3 mg; white solid; mp 142–145°C; TLC (PET:EtOAc, 100:1 v/v):  $R_f$  = 0.3;  $^1\text{H}$  NMR (600 MHz,  $\text{CDCl}_3$ )  $\delta$ =12.26 (s, 1H), 8.02 (d,  $J$  = 1.8 Hz, 1H), 7.82 (d,  $J$  = 7.2 Hz, 1H), 7.55 (dd,  $J$  = 16.8, 4.8 Hz, 3H), 7.39 (dd,  $J$  = 16.8, 9.6 Hz, 3H), 7.33 (d,  $J$  = 7.2 Hz, 2H), 7.27 (dt,  $J$  = 17.4, 7.2 Hz, 4H), 7.17 (t,  $J$  = 7.2 Hz, 1H), 6.94 (d,  $J$  = 8.4 Hz, 1H), 6.85 (t,  $J$  = 7.2 Hz, 1H), 5.71 (t,  $J$  = 7.2 Hz, 1H), 3.83 (dd,  $J$  = 17.4, 7.8 Hz, 1H), 3.72 (dd,  $J$  = 17.4, 6.6 Hz, 1H), 1.31 (s, 6H), 1.26 (s, 6H).  $^{13}\text{C}$  NMR (150 MHz,  $\text{CDCl}_3$ )  $\delta$ =204.3, 162.5, 149.6, 144.2, 140.8, 138.4, 136.1, 135.0, 129.9, 129.7, 128.6, 128.4, 128.1, 127.7, 127.1, 127.1, 126.2, 119.5, 118.8, 118.5, 83.9, 45.1, 43.1, 24.9, 24.8. HRMS (ESI)  $m/z$  calcd for  $\text{C}_{33}\text{H}_{34}\text{BO}_4^+$  ( $\text{M}+\text{H}$ ) $^+$  505.25447, found 505.25424.

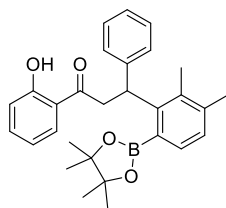

**3-(2,3-dimethyl-6-(4,4,5,5-tetramethyl-1,3,2-dioxaborolan-2-yl)phenyl)-1-(2-hydroxyphenyl)-3-phenylpropan-1-one (114):**

Yield 79%; 36.0 mg; yellow oil; TLC (PET:EtOAc, 100:1 v/v):  $R_f = 0.3$ ;  $^1\text{H NMR}$  (400 MHz,  $\text{CDCl}_3$ )  $\delta=12.44$  (s, 1H), 7.82 (d,  $J = 7.2$  Hz, 1H), 7.53 (d,  $J = 7.6$  Hz, 1H), 7.42–7.36 (m, 1H), 7.22–7.16 (m, 2H), 7.10 (dd,  $J = 7.6, 4.8$  Hz, 3H), 7.05 (d,  $J = 7.6$  Hz, 1H), 6.94 (d,  $J = 8.4$  Hz, 1H), 6.83 (t,  $J = 7.6$  Hz, 1H), 5.84–5.68 (m, 1H), 4.28 (dd,  $J = 16.8, 7.6$  Hz, 1H), 3.57 (dd,  $J = 17.6, 4.4$  Hz, 1H), 2.20 (s, 3H), 2.00 (s, 3H), 1.17 (s, 12H).  $^{13}\text{C NMR}$  (100 MHz,  $\text{CDCl}_3$ )  $\delta=205.3, 162.7, 148.5, 144.4, 141.0, 136.3, 135.5, 133.3, 130.1, 128.2, 127.6, 125.5, 119.7, 119.0, 118.6, 83.7, 42.3, 42.1, 25.0, 24.7, 21.5, 16.9$ . HRMS (ESI)  $m/z$  calcd for  $\text{C}_{29}\text{H}_{34}\text{BO}_4^+$  ( $\text{M}+\text{H}$ ) $^+$  457.25447, found 457.25491.

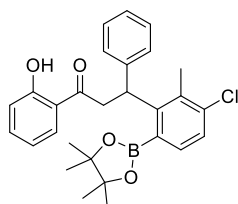

**3-(3-chloro-2-methyl-6-(4,4,5,5-tetramethyl-1,3,2-dioxaborolan-2-yl)phenyl)-1-(2-hydroxyphenyl)-3-phenylpropan-1-one (115):**

Yield 76%; 36.2 mg; white solid; mp 89–92°C; TLC (PET:EtOAc, 100:1 v/v):  $R_f = 0.3$ ;  $^1\text{H NMR}$  (600 MHz,  $\text{CDCl}_3$ )  $\delta=12.33$  (s, 1H), 7.83 (d,  $J = 7.8$  Hz, 1H), 7.59–7.38 (m, 2H), 7.28 (d,  $J = 7.8$  Hz, 1H), 7.23 (t,  $J = 6.6$  Hz, 2H), 7.16 (d,  $J = 7.2$  Hz, 1H), 7.06 (d,  $J = 7.2$  Hz, 2H), 6.99 (d,  $J = 8.4$  Hz, 1H), 6.89 (t,  $J = 7.2$  Hz, 1H), 5.75 (s, 1H), 4.25 (s, 1H), 3.56 (d,  $J = 17.4$  Hz, 1H), 2.15 (s, 3H), 1.20 (s, 12H).  $^{13}\text{C NMR}$  (150 MHz,  $\text{CDCl}_3$ )  $\delta=204.5, 162.5, 150.3, 143.2, 138.8, 136.3, 134.8, 133.9, 129.8, 128.2, 127.3, 125.7, 119.4, 118.9, 118.5, 84.0, 42.2, 41.6, 24.8, 24.5, 17.5$ . HRMS (ESI)  $m/z$  calcd for  $\text{C}_{28}\text{H}_{31}\text{BClO}_4^+$  ( $\text{M}+\text{H}$ ) $^+$  477.19984, found 477.19937.

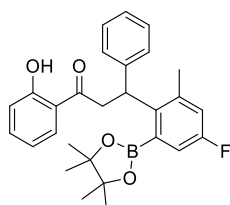

**3-(4-fluoro-2-methyl-6-(4,4,5,5-tetramethyl-1,3,2-dioxaborolan-2-yl)phenyl)-1-(2-hydroxyphenyl)-3-phenylpropan-1-one (116):**

Yield 83%; 38.2 mg; white solid; mp 113–116°C; TLC (PET:EtOAc, 100:1 v/v):  $R_f = 0.3$ ;  $^1\text{H NMR}$  (600 MHz,  $\text{CDCl}_3$ )  $\delta=12.36$  (s, 1H), 7.86 (d,  $J = 7.8$  Hz, 1H), 7.45 (t,  $J = 7.2$  Hz, 1H), 7.27 (dd,  $J = 8.4, 2.4$  Hz, 1H), 7.22 (dd,  $J = 9.0, 5.4$  Hz, 2H), 7.14 (t,  $J = 7.2$  Hz, 1H), 7.07 (d,  $J = 7.2$  Hz, 2H), 6.98 (d,  $J = 8.4$  Hz, 1H), 6.88 (t,  $J = 7.8$  Hz, 2H), 5.61 (s, 1H), 4.27 (dd,  $J = 16.8, 7.2$  Hz, 1H), 3.60 (dd,  $J = 17.4, 4.8$  Hz, 1H), 2.14 (s, 3H), 1.18 (d,  $J = 9.6$  Hz, 12H).  $^{13}\text{C NMR}$  (150 MHz,  $\text{CDCl}_3$ )  $\delta=204.9, 162.4, 161.4, 159.8, 143.7, 143.3, 139.2, 139.2, 136.1, 129.8, 127.9, 127.3, 125.5, 120.1, 120.0, 119.4, 119.3, 118.7, 118.4, 83.9, 41.5, 40.6, 24.7, 24.4, 21.1$ . HRMS (ESI)  $m/z$  calcd for  $\text{C}_{28}\text{H}_{31}\text{BFO}_4^+$  ( $\text{M}+\text{H}$ ) $^+$  461.22939, found 461.22974.

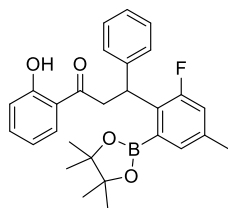

**3-(2-fluoro-4-methyl-6-(4,4,5,5-tetramethyl-1,3,2-dioxaborolan-2-yl)phenyl)-1-(2-hydroxyphenyl)-3-phenylpropan-1-one (117):**

Yield 81%; 37.3 mg; colorless oil; TLC (PET:EtOAc, 100:1 v/v):  $R_f = 0.3$ ;  $^1\text{H NMR}$  (600 MHz,  $\text{CDCl}_3$ )  $\delta=12.29$  (s, 1H), 7.84 (d,  $J = 7.8$  Hz, 1H), 7.40 (t,  $J = 7.8$  Hz, 3H), 7.36 (s, 1H), 7.25 (t,  $J = 7.8$  Hz, 2H), 7.16 (d,  $J = 7.2$  Hz, 1H), 6.92 (d,  $J = 7.8$  Hz, 1H), 6.84 (dd,  $J = 18.6, 10.8$  Hz, 2H), 5.69 (t,  $J = 7.2$  Hz, 1H), 3.91 (dd,  $J = 22.2, 7.2$  Hz, 2H), 2.25 (s, 3H), 1.32 (d,  $J = 9.6$  Hz, 12H).  $^{13}\text{C NMR}$  (150 MHz,  $\text{CDCl}_3$ )  $\delta=204.9, 162.5, 160.8, 143.4, 138.1, 136.1, 133.0, 133.0, 132.1, 130.0, 128.1, 127.8, 126.0, 119.6, 119.5, 119.3, 118.8, 118.4, 84.1, 41.5, 40.1, 24.8, 20.7$ . HRMS (ESI)  $m/z$  calcd for  $\text{C}_{28}\text{H}_{31}\text{BFO}_4^+$  ( $\text{M}+\text{H}$ ) $^+$  461.22939, found 461.22998.

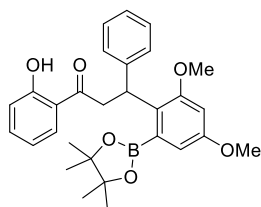

**3-(2,4-dimethoxy-6-(4,4,5,5-tetramethyl-1,3,2-dioxaborolan-2-yl)phenyl)-1-(2-hydroxyphenyl)-3-phenylpropan-1-one (118):**

Yield 85%; 41.5 mg; yellow oil; TLC (PET:EtOAc, 100:1 v/v):  $R_f = 0.3$ ;  $^1\text{H NMR}$  (600 MHz,  $\text{CDCl}_3$ )  $\delta=12.44$  (s, 1H), 7.80 (d,  $J = 7.8$  Hz, 1H), 7.38–7.28 (m, 3H), 7.20 (t,  $J = 7.8$  Hz, 2H), 7.08 (t,  $J = 7.2$  Hz, 1H), 6.87 (d,  $J = 9.6$  Hz, 2H), 6.77 (t,  $J = 7.8$  Hz, 1H), 6.41 (s, 1H), 5.61 (t,  $J = 7.2$  Hz, 1H), 3.93 (ddd,  $J = 24.0, 16.2, 7.2$  Hz, 2H), 3.70 (s, 3H), 3.47 (s, 3H), 1.28 (d,  $J = 3.6$  Hz, 12H).  $^{13}\text{C NMR}$  (150 MHz,  $\text{CDCl}_3$ )  $\delta=206.2, 162.6, 159.0, 144.5, 136.0, 132.0, 130.5, 130.3, 127.9, 127.7, 125.4, 119.8, 118.8, 118.4, 110.6, 102.7, 84.0, 55.2, 55.2, 40.9, 24.9, 24.8$ . HRMS (ESI)  $m/z$  calcd for  $\text{C}_{29}\text{H}_{34}\text{BO}_6^+$  ( $\text{M}+\text{H}$ ) $^+$  489.24430, found 489.24493.

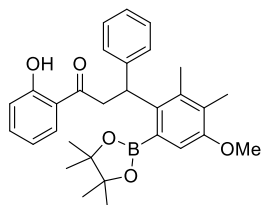

**1-(2-hydroxyphenyl)-3-(4-methoxy-2,3-dimethyl-6-(4,4,5,5-tetramethyl-1,3,2-dioxaborolan-2-yl)phenyl)-3-phenylpropan-1-one (119):**

Yield 87%; 42.3 mg; white solid; mp 152–155°C; TLC (PET:EtOAc, 100:1 v/v):  $R_f = 0.3$ ;  $^1\text{H NMR}$  (600 MHz,  $\text{CDCl}_3$ )  $\delta=12.43$  (s, 1H), 7.83 (d,  $J = 7.8$  Hz, 1H), 7.42 (t,  $J = 7.8$  Hz, 1H), 7.20 (dd,  $J = 14.4, 7.2$  Hz, 2H), 7.11 (t,  $J = 7.8$  Hz, 4H), 6.96 (d,  $J = 8.4$  Hz, 1H), 6.85 (t,  $J = 7.8$  Hz, 1H), 5.71 (s, 1H), 4.23 (s, 1H), 3.82 (d,  $J = 15.0$  Hz, 3H), 3.56 (dd,  $J = 17.4, 4.2$  Hz, 1H), 2.11 (s, 3H), 1.98 (s, 3H), 1.20 (s, 12H).  $^{13}\text{C NMR}$

NMR (150 MHz, CDCl<sub>3</sub>)  $\delta$ =205.3, 162.6, 155.5, 144.6, 141.0, 136.9, 136.1, 130.0, 129.3, 128.0, 127.3, 125.3, 119.6, 118.8, 118.5, 114.2, 83.7, 55.5, 42.4, 41.7, 24.9, 24.6, 17.4, 12.4. HRMS (ESI) *m/z* calcd for C<sub>30</sub>H<sub>36</sub>BO<sub>5</sub><sup>+</sup> (M+H)<sup>+</sup> 487.26503, found 487.26547.

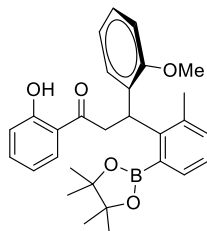

**1-(2-hydroxyphenyl)-3-(2-methoxyphenyl)-3-(2-methyl-6-(4,4,5,5-tetramethyl-1,3,2-dioxaborolan-2-yl)phenyl)propan-1-one (120):**

Yield 68%; 32.1 mg; white solid; mp 132–134°C; TLC (PET:EtOAc, 50:1 v/v): *R<sub>f</sub>* = 0.3; <sup>1</sup>H NMR (600 MHz, CDCl<sub>3</sub>)  $\delta$ =12.42 (s, 1H), 7.86 (d, *J* = 7.8 Hz, 1H), 7.51 (d, *J* = 6.6 Hz, 1H), 7.44 (t, *J* = 7.2 Hz, 1H), 7.16–7.08 (m, 4H), 6.97 (d, *J* = 8.4 Hz, 1H), 6.86 (t, *J* = 7.2 Hz, 1H), 6.81 (t, *J* = 7.2 Hz, 1H), 6.74 (d, *J* = 7.8 Hz, 1H), 5.57 (s, 1H), 4.37 (dd, *J* = 16.8, 9.6 Hz, 1H), 3.51 (s, 3H), 3.45 (dd, *J* = 16.8, 4.2 Hz, 1H), 2.23 (s, 3H), 1.24 (d, *J* = 10.8 Hz, 12H). <sup>13</sup>C NMR (150 MHz, CDCl<sub>3</sub>)  $\delta$ =205.1, 162.4, 157.5, 147.4, 136.4, 135.8, 133.4, 132.8, 130.9, 129.9, 128.8, 127.1, 125.5, 119.8, 118.7, 118.3, 110.7, 83.7, 54.8, 41.5, 38.8, 25.1, 24.5, 21.3. HRMS (ESI) *m/z* calcd for C<sub>29</sub>H<sub>34</sub>BO<sub>5</sub><sup>+</sup> (M+H)<sup>+</sup> 473.24938, found 473.24997.

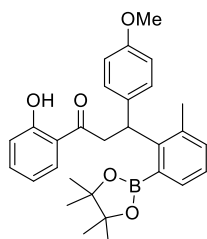

**1-(2-hydroxyphenyl)-3-(4-methoxyphenyl)-3-(2-methyl-6-(4,4,5,5-tetramethyl-1,3,2-dioxaborolan-2-yl)phenyl)propan-1-one (121):**

Yield 61%; 28.8 mg; yellow oil; TLC (PET:EtOAc, 50:1 v/v): *R<sub>f</sub>* = 0.3; <sup>1</sup>H NMR (600 MHz, CDCl<sub>3</sub>)  $\delta$ =12.42 (s, 1H), 7.85 (d, *J* = 7.8 Hz, 1H), 7.57 (d, *J* = 7.2 Hz, 1H), 7.40 (t, *J* = 7.8 Hz, 1H), 7.13 (dt, *J* = 14.4, 7.2 Hz, 2H), 6.99 (d, *J* = 8.4 Hz, 2H), 6.95 (d, *J* = 8.4 Hz, 1H), 6.84 (t, *J* = 7.8 Hz, 1H), 6.75 (d, *J* = 8.4 Hz, 2H), 5.56 (s, 1H), 4.27 (d, *J* = 7.8 Hz, 1H), 3.69 (s, 3H), 3.61–3.54 (m, 1H), 2.15 (s, 3H), 1.19 (d, *J* = 12.6 Hz, 12H). <sup>13</sup>C NMR (150 MHz, CDCl<sub>3</sub>)  $\delta$ =205.3, 162.6, 157.6, 148.3, 136.6, 136.3, 135.7, 134.1, 133.5, 131.1, 130.1, 128.7, 126.1, 119.6, 118.9, 118.5, 113.5, 83.8, 55.2, 41.8, 41.1, 25.0, 24.6, 21.3. HRMS (ESI) *m/z* calcd for C<sub>29</sub>H<sub>34</sub>BO<sub>5</sub><sup>+</sup> (M+H)<sup>+</sup> 473.24938, found 473.24991.

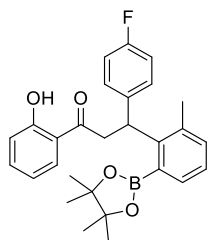

**3-(4-fluorophenyl)-1-(2-hydroxyphenyl)-3-(2-methyl-6-(4,4,5,5-tetramethyl-1,3,2-dioxaborolan-2-yl)phenyl)propan-1-one (122):**

Yield 56%; 25.7 mg; yellow oil; TLC (PET:EtOAc, 100:1 v/v):  $R_f = 0.3$ ;  $^1\text{H NMR}$  (600 MHz,  $\text{CDCl}_3$ )  $\delta=12.35$  (s, 1H), 7.85 (d,  $J = 7.8$  Hz, 1H), 7.59 (d,  $J = 7.2$  Hz, 1H), 7.46 (t,  $J = 7.8$  Hz, 1H), 7.17 (dt,  $J = 13.2, 6.6$  Hz, 2H), 7.10–7.01 (m, 2H), 6.99 (d,  $J = 8.4$  Hz, 1H), 6.89 (dt,  $J = 13.2, 7.8$  Hz, 3H), 5.58 (s, 1H), 4.29 (dd,  $J = 16.8, 7.8$  Hz, 1H), 3.60 (dd,  $J = 17.4, 3.0$  Hz, 1H), 2.15 (s, 3H), 1.19 (d,  $J = 5.4$  Hz, 12H).  $^{13}\text{C NMR}$  (150 MHz,  $\text{CDCl}_3$ )  $\delta=204.9, 162.5, 161.8, 160.1, 147.9, 139.3, 136.5, 136.3, 134.1, 133.6, 129.9, 129.0, 129.0, 126.2, 119.5, 118.9, 118.5, 114.8, 114.6, 83.8, 41.9, 40.9, 24.9, 24.5, 21.2$ .  $^{19}\text{F NMR}$  (375MHz,  $\text{CDCl}_3$ )  $\delta=118.11$ . HRMS (ESI)  $m/z$  calcd for  $\text{C}_{28}\text{H}_{31}\text{BFO}_4^+$  ( $\text{M}+\text{H}$ ) $^+$  461.22939, found 461.22995.

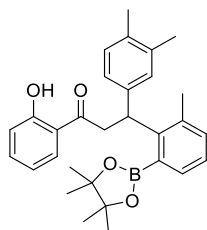

**3-(3,4-dimethylphenyl)-1-(2-hydroxyphenyl)-3-(2-methyl-6-(4,4,5,5-tetramethyl-1,3,2-dioxaborolan-2-yl)phenyl)propan-1-one (123):**

Yield 73%; 34.3 mg; yellow oil; TLC (PET:EtOAc, 100:1 v/v):  $R_f = 0.3$ ;  $^1\text{H NMR}$  (600 MHz,  $\text{CDCl}_3$ )  $\delta=12.43$  (s, 1H), 7.86 (d,  $J = 7.8$  Hz, 1H), 7.57 (d,  $J = 6.6$  Hz, 1H), 7.40 (t,  $J = 7.2$  Hz, 1H), 7.12 (dt,  $J = 14.4, 7.2$  Hz, 2H), 6.95 (dd,  $J = 10.2, 9.0$  Hz, 2H), 6.88–6.80 (m, 3H), 5.57 (s, 1H), 4.27 (dd,  $J = 16.2, 7.2$  Hz, 1H), 3.56 (dd,  $J = 17.4, 4.8$  Hz, 1H), 2.15 (d,  $J = 18.0$  Hz, 9H), 1.18 (d,  $J = 16.8$  Hz, 12H).  $^{13}\text{C NMR}$  (150 MHz,  $\text{CDCl}_3$ )  $\delta=205.4, 162.6, 148.3, 140.9, 136.7, 136.2, 136.0, 134.1, 133.7, 133.4, 131.2, 130.1, 129.3, 129.1, 126.1, 125.1, 119.7, 118.9, 118.5, 83.8, 41.6, 25.0, 24.6, 21.4, 20.0, 19.3$ . HRMS (ESI)  $m/z$  calcd for  $\text{C}_{30}\text{H}_{36}\text{BO}_4^+$  ( $\text{M}+\text{H}$ ) $^+$  471.27012, found 471.27090.

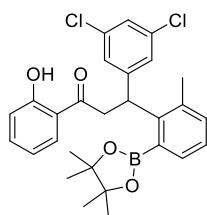

**3-(3,5-dichlorophenyl)-1-(2-hydroxyphenyl)-3-(2-methyl-6-(4,4,5,5-tetramethyl-1,3,2-dioxaborolan-2-yl)phenyl)propan-1-one (124):**

Yield 51%; 26.0 mg; yellow oil; TLC (PET:EtOAc, 100:1 v/v):  $R_f = 0.3$ ;  $^1\text{H}$  NMR (600 MHz,  $\text{CDCl}_3$ )  $\delta=12.25$  (s, 1H), 7.81 (d,  $J = 7.8$  Hz, 1H), 7.65 (d,  $J = 7.2$  Hz, 1H), 7.47 (t,  $J = 7.8$  Hz, 1H), 7.23–7.14 (m, 3H), 7.02–6.94 (m, 3H), 6.88 (t,  $J = 7.8$  Hz, 1H), 5.58 (s, 1H), 4.19 (s, 1H), 3.68 (d,  $J = 17.4$  Hz, 1H), 2.20 (s, 3H), 1.21 (s, 12H).  $^{13}\text{C}$  NMR (150 MHz,  $\text{CDCl}_3$ )  $\delta=204.4$ , 162.5, 147.7, 146.8, 136.4, 134.5, 134.3, 129.8, 126.6, 126.2, 125.8, 119.3, 118.9, 118.6, 83.9, 41.8, 40.8, 24.9, 24.5, 21.3. HRMS (ESI)  $m/z$  calcd for  $\text{C}_{28}\text{H}_{30}\text{BCl}_2\text{O}_4^+$  ( $\text{M}+\text{H}$ ) $^+$  511.16087, found 511.16025.

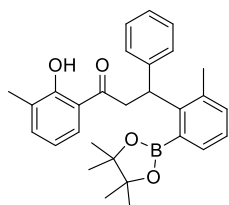

**1-(2-hydroxy-3-methylphenyl)-3-(2-methyl-6-(4,4,5,5-tetramethyl-1,3,2-dioxaborolan-2-yl)phenyl)-3-phenylpropan-1-one (125):**

Yield 64%; 29.2 mg; orange oil; TLC (PET:EtOAc, 100:1 v/v):  $R_f = 0.3$ ;  $^1\text{H}$  NMR (600 MHz,  $\text{CDCl}_3$ )  $\delta=12.73$  (s, 1H), 7.72 (d,  $J = 7.8$  Hz, 1H), 7.59 (d,  $J = 7.2$  Hz, 1H), 7.29 (d,  $J = 7.2$  Hz, 1H), 7.19 (t,  $J = 7.2$  Hz, 2H), 7.15 (d,  $J = 6.0$  Hz, 1H), 7.12 (d,  $J = 7.8$  Hz, 1H), 7.10 (d,  $J = 7.2$  Hz, 1H), 7.07 (d,  $J = 7.8$  Hz, 2H), 6.76 (t,  $J = 7.8$  Hz, 1H), 5.65 (s, 1H), 4.35 (d,  $J = 9.0$  Hz, 1H), 3.55 (dd,  $J = 17.4$ , 4.2 Hz, 1H), 2.24 (s, 3H), 2.14 (s, 3H), 1.17 (d,  $J = 11.4$  Hz, 12H).  $^{13}\text{C}$  NMR (150 MHz,  $\text{CDCl}_3$ )  $\delta=205.3$ , 161.1, 148.3, 143.8, 137.0, 136.7, 134.1, 133.6, 131.2, 130.9, 128.1, 127.7, 127.6, 126.1, 125.5, 118.9, 118.2, 83.8, 41.8, 41.6, 25.0, 24.6, 21.3, 15.6. HRMS (ESI)  $m/z$  calcd for  $\text{C}_{29}\text{H}_{34}\text{BO}_4^+$  ( $\text{M}+\text{H}$ ) $^+$  457.25447, found 457.25519.

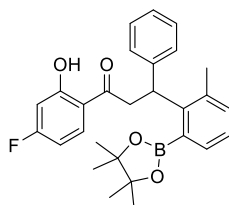

**1-(4-fluoro-2-hydroxyphenyl)-3-(2-methyl-6-(4,4,5,5-tetramethyl-1,3,2-dioxaborolan-2-yl)phenyl)-3-phenylpropan-1-one (126):**

Yield 62%; 28.5 mg; colorless oil; TLC (PET:EtOAc, 100:1 v/v):  $R_f = 0.3$ ;  $^1\text{H}$  NMR (600 MHz,  $\text{CDCl}_3$ )  $\delta=12.74$  (s, 1H), 7.84 (dd,  $J = 8.4$ , 6.6 Hz, 1H), 7.59 (d,  $J = 6.6$  Hz, 1H), 7.20 (t,  $J = 7.8$  Hz, 2H), 7.13 (dt,  $J = 12.0$ , 7.2 Hz, 3H), 7.07 (d,  $J = 7.8$  Hz, 2H), 6.62 (dd,  $J = 10.2$ , 2.4 Hz, 1H), 6.55 (td,  $J = 9.0$ , 2.4 Hz, 1H), 5.61 (s, 1H), 4.22 (dd,  $J = 16.8$ , 7.8 Hz, 1H), 3.60 (dd,  $J = 17.4$ , 4.8 Hz, 1H), 2.14 (s, 3H), 1.17 (d,  $J = 13.2$  Hz, 12H).  $^{13}\text{C}$  NMR (150 MHz,  $\text{CDCl}_3$ )  $\delta=204.3$ , 168.1, 166.4, 165.2, 165.1, 147.9, 143.6, 136.6, 134.1, 133.7, 132.5, 132.4, 128.1, 127.6, 126.2, 125.6, 116.8, 107.1, 107.0, 105.1, 104.9, 83.8, 41.8, 25.0, 24.6, 21.3. HRMS (ESI)  $m/z$  calcd for  $\text{C}_{28}\text{H}_{31}\text{BFO}_4^+$  ( $\text{M}+\text{H}$ ) $^+$  461.22939, found 461.22980.

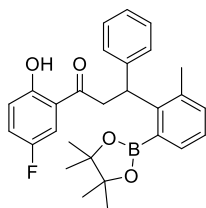

**1-(5-fluoro-2-hydroxyphenyl)-3-(2-methyl-6-(4,4,5,5-tetramethyl-1,3,2-dioxaborolan-2-yl)phenyl)-3-phenylpropan-1-one (127):**

Yield 58%; 26.7 mg; yellow oil; TLC (PET:EtOAc, 100:1 v/v):  $R_f = 0.3$ ;  $^1\text{H}$  NMR (600 MHz,  $\text{CDCl}_3$ )  $\delta=12.13$  (s, 1H), 7.60 (d,  $J = 7.2$  Hz, 1H), 7.54 (d,  $J = 7.2$  Hz, 1H), 7.24–7.13 (m, 3H), 7.13–7.04 (m, 5H), 6.87 (dd,  $J = 9.0, 4.8$  Hz, 1H), 5.60 (s, 1H), 4.21 (dd,  $J = 16.8, 7.2$  Hz, 1H), 3.70–3.60 (m, 1H), 2.18 (s, 3H), 1.17 (d,  $J = 15.0$  Hz, 12H).  $^{13}\text{C}$  NMR (150 MHz,  $\text{CDCl}_3$ )  $\delta=204.8, 158.8, 155.6, 154.0, 147.8, 143.6, 136.7, 134.1, 133.9, 131.0, 128.2, 127.7, 126.3, 125.7, 123.9, 123.8, 119.9, 119.8, 119.2, 119.1, 115.3, 115.1, 83.8, 41.9, 41.5, 25.0, 24.6, 21.3$ .  $^{19}\text{F}$  NMR (375 MHz,  $\text{CDCl}_3$ )  $\delta=-123.73$ . HRMS (ESI)  $m/z$  calcd for  $\text{C}_{28}\text{H}_{31}\text{BFO}_4^+$  ( $\text{M}+\text{H}$ ) $^+$  461.22939, found 461.22958.

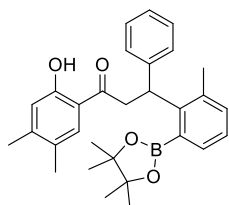

**1-(2-hydroxy-4,5-dimethylphenyl)-3-(2-methyl-6-(4,4,5,5-tetramethyl-1,3,2-dioxaborolan-2-yl)phenyl)-3-phenylpropan-1-one (128):**

Yield 72%; 33.8 mg; yellow oil; TLC (PET:EtOAc, 100:1 v/v):  $R_f = 0.3$ ;  $^1\text{H}$  NMR (600 MHz,  $\text{CDCl}_3$ )  $\delta=12.25$  (s, 1H), 7.58 (d,  $J = 10.8$  Hz, 2H), 7.19 (dd,  $J = 14.4, 7.2$  Hz, 3H), 7.13 (dd,  $J = 15.0, 7.2$  Hz, 2H), 7.07 (d,  $J = 7.2$  Hz, 2H), 6.77 (s, 1H), 5.60 (s, 1H), 4.33 (d,  $J = 7.2$  Hz, 1H), 3.51 (dd,  $J = 17.4, 4.2$  Hz, 1H), 2.21 (d,  $J = 34.8$  Hz, 9H), 1.17 (d,  $J = 12.0$  Hz, 12H).  $^{13}\text{C}$  NMR (150 MHz,  $\text{CDCl}_3$ )  $\delta=204.4, 160.9, 148.3, 146.6, 143.9, 136.6, 133.9, 133.5, 130.2, 128.0, 127.7, 127.0, 126.1, 125.5, 119.0, 117.5, 83.7, 41.7, 41.5, 25.0, 24.6, 21.3, 20.5, 19.0$ . HRMS (ESI)  $m/z$  calcd for  $\text{C}_{30}\text{H}_{36}\text{BO}_4^+$  ( $\text{M}+\text{H}$ ) $^+$  471.27012, found 471.27075.

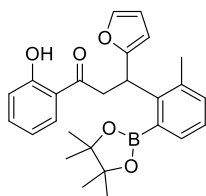

**3-(furan-2-yl)-1-(2-hydroxyphenyl)-3-(2-methyl-6-(4,4,5,5-tetramethyl-1,3,2-dioxaborolan-2-yl)phenyl)propan-1-one (129):**

Yield 77%; 33.3 mg; yellow solid; mp 130–133°C; TLC (PET:EtOAc, 100:1 v/v):  $R_f = 0.3$ ;  $^1\text{H}$  NMR (600 MHz,  $\text{CDCl}_3$ )  $\delta=12.45$  (s, 1H), 7.90 (d,  $J = 7.8$  Hz, 1H), 7.65 (d,  $J = 7.2$  Hz, 1H), 7.47 (t,  $J = 7.8$  Hz, 1H), 7.28 (s, 1H), 7.25 (d,  $J = 7.2$  Hz, 1H), 7.20 (t,  $J = 7.2$  Hz, 1H), 7.01 (d,  $J = 8.4$  Hz, 1H), 6.90 (t,  $J = 7.8$  Hz, 1H), 6.29 (d,  $J = 1.8$  Hz,



1H), 5.85 (s, 1H), 5.58 (s, 1H), 4.42 (d,  $J = 9.0$  Hz, 1H), 3.54 (dd,  $J = 17.4, 4.8$  Hz, 1H), 2.31 (s, 3H), 1.27 (d,  $J = 34.8$  Hz, 12H).  $^{13}\text{C}$  NMR (150 MHz,  $\text{CDCl}_3$ )  $\delta$ =204.8, 162.5, 157.4, 145.3, 140.6, 136.5, 136.1, 133.8, 130.1, 126.4, 119.7, 118.8, 118.4, 110.6, 106.0, 83.7, 41.5, 37.1, 24.9, 24.9, 20.7. HRMS (ESI)  $m/z$  calcd for  $\text{C}_{26}\text{H}_{30}\text{BO}_5^+$  ( $\text{M}+\text{H}$ ) $^+$  433.21808, found 433.21875.

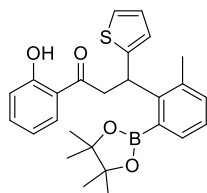

**1-(2-hydroxyphenyl)-3-(2-methyl-6-(4,4,5,5-tetramethyl-1,3,2-dioxaborolan-2-yl)phenyl)-3-(thiophen-2-yl)propan-1-one (130):**

Yield 63%; 28.2 mg; white solid; mp 135–138°C; TLC (PET:EtOAc, 100:1 v/v):  $R_f = 0.3$ ;  $^1\text{H}$  NMR (600 MHz,  $\text{CDCl}_3$ )  $\delta$ =12.37 (s, 1H), 7.85 (d,  $J = 7.8$  Hz, 1H), 7.59 (d,  $J = 7.2$  Hz, 1H), 7.42 (t,  $J = 7.8$  Hz, 1H), 7.19 (d,  $J = 7.2$  Hz, 1H), 7.15 (t,  $J = 7.2$  Hz, 1H), 7.08 (d,  $J = 4.8$  Hz, 1H), 6.95 (d,  $J = 8.4$  Hz, 1H), 6.85 (t,  $J = 6.6$  Hz, 2H), 6.60 (s, 1H), 5.69 (s, 1H), 4.26 (s, 1H), 3.80 (d,  $J = 16.2$  Hz, 1H), 2.31 (s, 3H), 1.19 (d,  $J = 7.8$  Hz, 12H).  $^{13}\text{C}$  NMR (150 MHz,  $\text{CDCl}_3$ )  $\delta$ =204.8, 162.6, 149.4, 147.0, 136.6, 136.3, 133.8, 130.6, 130.1, 126.5, 126.4, 124.2, 123.5, 119.7, 118.9, 118.5, 83.8, 43.9, 38.5, 24.9, 24.6, 21.1. HRMS (ESI)  $m/z$  calcd for  $\text{C}_{26}\text{H}_{30}\text{BO}_4\text{S}^+$  ( $\text{M}+\text{H}$ ) $^+$  449.19524, found 449.19592.

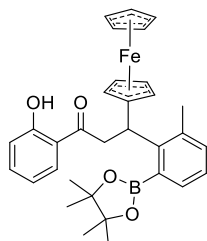

**1-(2-hydroxyphenyl)-3-(2-methyl-6-(4,4,5,5-tetramethyl-1,3,2-dioxaborolan-2-yl)phenyl)-3-ferrocenylpropan-1-one (131):**

Yield 91%; 50.0 mg; brown solid; mp 138–142°C; TLC (PET:EtOAc, 100:1 v/v):  $R_f = 0.3$ ;  $^1\text{H}$  NMR (600 MHz,  $\text{CDCl}_3$ )  $\delta$ =12.69 (s, 0.25H), 12.49 (s, 0.75H), 7.91 (d,  $J = 7.2$  Hz, 0.25H), 7.67 (d,  $J = 7.8$  Hz, 0.75H), 7.52 (dd,  $J = 25.2, 6.6$  Hz, 1H), 7.38 (dd,  $J = 19.2, 12.0$  Hz, 1H), 7.22–7.16 (m, 0.25H), 7.09–6.95 (m, 2H), 6.92 (d,  $J = 8.4$  Hz, 0.75H), 6.80 (dd,  $J = 18.0, 10.8$  Hz, 1H), 5.84 (dd,  $J = 8.4, 4.8$  Hz, 0.75H), 5.51 (s, 0.25H), 4.25 (d,  $J = 62.4$  Hz, 5H), 4.06 (dd,  $J = 24.6, 8.4$  Hz, 3.5H), 3.92 (d,  $J = 12.0$  Hz, 0.5H), 3.80–3.69 (m, 1H), 3.58 (dd,  $J = 15.0, 9.0$  Hz, 1H), 2.57 (s, 0.75H), 2.07 (s, 2.25H), 1.38 (d,  $J = 4.2$  Hz, 9H), 1.16 (d,  $J = 16.2$  Hz, 3H).  $^{13}\text{C}$  NMR (150 MHz,  $\text{CDCl}_3$ )  $\delta$ =206.6, 205.3, 162.7, 148.5, 147.7, 136.2, 136.0, 135.5, 134.9, 134.2, 133.4, 132.7, 131.1, 130.6, 130.1, 126.0, 125.6, 120.0, 119.8, 118.8, 118.5, 93.2, 92.7, 83.8, 83.6, 69.6, 69.5, 69.2, 69.1, 68.9, 68.0, 67.2, 66.4, 65.9, 43.6, 40.8, 39.5, 36.8, 25.5, 25.1, 25.0, 24.9, 21.5, 21.2. HRMS (ESI)  $m/z$  calcd for  $\text{C}_{32}\text{H}_{35}\text{BFeO}_4^+$  ( $\text{M}$ ) $^+$  550.19723, found 550.19769.

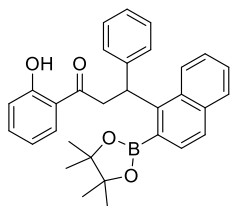

**1-(2-hydroxyphenyl)-3-phenyl-3-(2-(4,4,5,5-tetramethyl-1,3,2-dioxaborolan-2-yl)naphthalen-1-yl)propan-1-one (132):**

Yield 66%; 31.5 mg; yellow solid; mp 130–134°C; TLC (PET:EtOAc, 100:1 v/v):  $R_f = 0.3$ ;  $^1\text{H NMR}$  (600 MHz,  $\text{CDCl}_3$ )  $\delta$ =12.40 (s, 1H), 7.83 (d,  $J = 36.0$  Hz, 1H), 7.79 (d,  $J = 8.4$  Hz, 1H), 7.74 (d,  $J = 8.4$  Hz, 1H), 7.70 (d,  $J = 8.4$  Hz, 1H), 7.61 (d,  $J = 7.2$  Hz, 1H), 7.32 (t,  $J = 7.8$  Hz, 2H), 7.20 (dt,  $J = 15.0, 7.8$  Hz, 5H), 7.10 (t,  $J = 7.2$  Hz, 1H), 6.91 (d,  $J = 8.4$  Hz, 1H), 6.68 (t,  $J = 7.8$  Hz, 1H), 6.24–6.18 (m, 1H), 4.39 (s, 1H), 3.71 (dd,  $J = 17.4, 4.8$  Hz, 1H), 1.28 (s, 12H).  $^{13}\text{C NMR}$  (150 MHz,  $\text{CDCl}_3$ )  $\delta$ =204.9, 162.6, 147.5, 144.3, 136.3, 136.1, 131.4, 131.0, 130.0, 129.2, 128.4, 127.3, 127.0, 126.1, 125.7, 125.6, 119.5, 118.9, 118.5, 84.1, 42.7, 25.0, 24.9. HRMS (ESI)  $m/z$  calcd for  $\text{C}_{31}\text{H}_{32}\text{BO}_4^+$  ( $\text{M}+\text{H}$ ) $^+$  479.23882, found 479.23895.

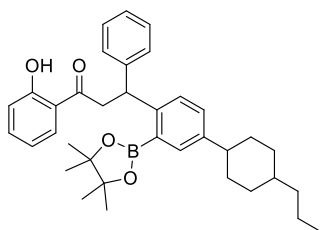

**1-(2-hydroxyphenyl)-3-phenyl-3-(4-(4-propylcyclohexyl)-2-(4,4,5,5-tetramethyl-1,3,2-dioxaborolan-2-yl)phenyl)propan-1-one (133):**

Yield 74%; 40.8 mg; white solid; mp 193–196°C; TLC (PET:EtOAc, 100:1 v/v):  $R_f = 0.3$ ;  $^1\text{H NMR}$  (600 MHz,  $\text{CDCl}_3$ )  $\delta$ =12.28 (s, 1H), 7.80 (d,  $J = 7.8$  Hz, 1H), 7.61 (s, 1H), 7.41 (t,  $J = 7.8$  Hz, 1H), 7.29 (d,  $J = 7.8$  Hz, 2H), 7.25 (t,  $J = 7.8$  Hz, 2H), 7.15 (dd,  $J = 16.8, 8.4$  Hz, 2H), 7.07 (d,  $J = 8.4$  Hz, 1H), 6.93 (d,  $J = 8.4$  Hz, 1H), 6.84 (t,  $J = 7.8$  Hz, 1H), 5.65–5.61 (m, 1H), 3.78 (dd,  $J = 17.4, 8.4$  Hz, 1H), 3.66 (dd,  $J = 16.8, 6.0$  Hz, 1H), 2.43 (t,  $J = 12.0$  Hz, 1H), 1.84 (t,  $J = 11.4$  Hz, 4H), 1.41 (dd,  $J = 17.4, 9.0$  Hz, 2H), 1.36–1.31 (m, 2H), 1.31–1.22 (m, 13H), 1.19 (dd,  $J = 15.0, 7.2$  Hz, 2H), 1.00 (dd,  $J = 22.8, 11.4$  Hz, 2H), 0.89 (t,  $J = 7.2$  Hz, 3H).  $^{13}\text{C NMR}$  (150 MHz,  $\text{CDCl}_3$ )  $\delta$ =204.4, 162.4, 148.0, 144.8, 144.3, 136.0, 134.9, 129.9, 129.4, 128.3, 128.1, 127.2, 126.0, 119.5, 118.8, 118.4, 83.6, 45.3, 44.1, 43.0, 39.8, 37.0, 34.2, 33.6, 24.8, 24.8, 20.0, 14.5. HRMS (ESI)  $m/z$  calcd for  $\text{C}_{36}\text{H}_{46}\text{BO}_4^+$  ( $\text{M}+\text{H}$ ) $^+$  553.34837, found 553.34808.

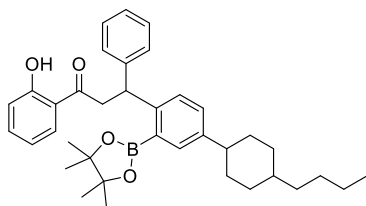

**3-(4-(4-butylcyclohexyl)-2-(4,4,5,5-tetramethyl-1,3,2-dioxaborolan-2-yl)phenyl)-1-(2-hydroxyphenyl)-3-phenylpropan-1-one (134):**

Yield 71%; 40.2 mg; white solid; mp 175–178°C; TLC (PET:EtOAc, 100:1 v/v):  $R_f = 0.3$ ;  $^1\text{H NMR}$  (600 MHz,  $\text{CDCl}_3$ )  $\delta=12.28$  (s, 1H), 7.76 (d,  $J = 7.8$  Hz, 1H), 7.63 (s, 1H), 7.37 (t,  $J = 7.8$  Hz, 1H), 7.28 (d,  $J = 7.8$  Hz, 2H), 7.23 (t,  $J = 7.8$  Hz, 2H), 7.17–7.10 (m, 2H), 7.07 (d,  $J = 7.8$  Hz, 1H), 6.91 (d,  $J = 8.4$  Hz, 1H), 6.80 (t,  $J = 7.8$  Hz, 1H), 5.64 (t,  $J = 7.2$  Hz, 1H), 3.71 (ddd,  $J = 22.8, 17.4, 7.2$  Hz, 2H), 2.42 (t,  $J = 12.0$  Hz, 1H), 1.84 (s, 4H), 1.47–1.39 (m, 2H), 1.35–1.11 (m, 19H), 1.00 (dd,  $J = 22.8, 11.4$  Hz, 2H), 0.89 (s, 3H).  $^{13}\text{C NMR}$  (150 MHz,  $\text{CDCl}_3$ )  $\delta=204.5, 162.5, 148.0, 144.8, 144.4, 136.1, 135.0, 130.0, 129.4, 128.4, 128.2, 127.3, 126.1, 119.6, 118.8, 118.5, 83.7, 45.3, 44.2, 43.1, 37.3, 37.2, 34.3, 33.7, 29.3, 24.9, 24.9, 23.1, 14.3$ . HRMS (ESI)  $m/z$  calcd for  $\text{C}_{37}\text{H}_{48}\text{BO}_4^+$  ( $\text{M}+\text{H}$ ) $^+$  567.36402, found 567.36377.

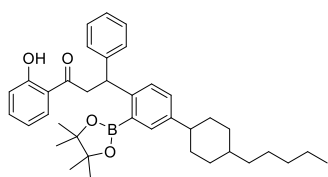

**1-(2-hydroxyphenyl)-3-(4-(4-pentylcyclohexyl)-2-(4,4,5,5-tetramethyl-1,3,2-dioxaborolan-2-yl)phenyl)-3-phenylpropan-1-one (135):**

Yield 59%; 34.2 mg; white solid; mp 90–93°C; TLC (PET:EtOAc, 100:1 v/v):  $R_f = 0.3$ ;  $^1\text{H NMR}$  (600 MHz,  $\text{CDCl}_3$ )  $\delta=12.28$  (s, 1H), 7.80 (d,  $J = 7.2$  Hz, 1H), 7.61 (s, 1H), 7.41 (t,  $J = 7.2$  Hz, 1H), 7.32–7.23 (m, 4H), 7.15 (dd,  $J = 15.6, 7.8$  Hz, 2H), 7.07 (d,  $J = 8.4$  Hz, 1H), 6.93 (d,  $J = 8.4$  Hz, 1H), 6.84 (t,  $J = 7.8$  Hz, 1H), 5.65–5.60 (m, 1H), 3.78 (dd,  $J = 17.4, 8.4$  Hz, 1H), 3.66 (dd,  $J = 17.4, 6.0$  Hz, 1H), 2.43 (t,  $J = 12.0$  Hz, 1H), 1.84 (s, 4H), 1.41 (dd,  $J = 17.4, 8.4$  Hz, 2H), 1.31–1.19 (m, 21H), 1.00 (dd,  $J = 23.4, 11.4$  Hz, 2H), 0.88 (t,  $J = 7.2$  Hz, 3H).  $^{13}\text{C NMR}$  (150 MHz,  $\text{CDCl}_3$ )  $\delta=204.4, 162.4, 147.9, 144.8, 144.3, 136.0, 134.9, 129.9, 129.4, 128.3, 128.1, 127.2, 126.0, 119.5, 118.7, 118.4, 83.6, 45.3, 44.1, 43.0, 37.4, 37.3, 34.2, 33.6, 32.2, 26.7, 24.8, 24.8, 22.7, 14.2$ . HRMS (ESI)  $m/z$  calcd for  $\text{C}_{38}\text{H}_{50}\text{BO}_4^+$  ( $\text{M}+\text{H}$ ) $^+$  581.37967, found 581.37952.

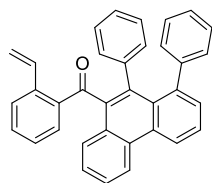

**(1,10-diphenylphenanthren-9-yl)(2-vinylphenyl)methanone (136):**

Yield 90%; 41.4 mg; white solid; mp 192–195 °C; TLC (PET:EtOAc, 100:1 v/v):  $R_f = 0.3$ ;  $^1\text{H NMR}$  (600 MHz,  $\text{CDCl}_3$ )  $\delta=8.83$  (d,  $J = 7.8$  Hz, 2H), 7.86 (d,  $J = 7.8$  Hz, 1H), 7.69 (d,  $J = 6.6$  Hz, 2H), 7.56 (d,  $J = 7.2$  Hz, 1H), 7.38 (d,  $J = 6.6$  Hz, 1H), 7.26–7.06 (m, 3H), 7.01–6.71 (m, 9H), 6.61 (s, 2H), 6.51–6.36 (m, 1H), 5.42 (d,  $J = 17.4$  Hz, 1H), 5.17 (d,  $J = 10.8$  Hz, 1H).  $^{13}\text{C NMR}$  (150 MHz,  $\text{CDCl}_3$ )  $\delta=200.8, 143.4, 142.7, 139.2, 138.9, 136.5, 136.3, 135.6, 132.4, 131.9, 131.2, 129.9, 129.0, 128.9, 127.6$ .

127.3, 127.1, 126.9, 126.6, 126.5, 126.3, 126.1, 125.7, 123.3, 122.1, 115.5. HRMS (ESI)  $m/z$  calcd for  $C_{35}H_{25}O^+$  ( $M+H$ ) $^+$  461.18999, found 461.19237.

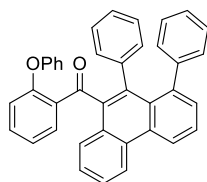

**(1,10-diphenylphenanthren-9-yl)(2-phenoxyphenyl)methanone (137):**

Yield 85%; 44.7 mg; white solid; mp 153–156°C; TLC (PET:EtOAc, 50:1 v/v):  $R_f$  = 0.3;  $^1H$  NMR (600 MHz,  $CDCl_3$ )  $\delta$ =8.69 (dd,  $J$  = 18.0, 8.4 Hz, 2H), 7.76 (d,  $J$  = 7.8 Hz, 1H), 7.59 (dd,  $J$  = 34.2, 7.2 Hz, 2H), 7.42 (d,  $J$  = 7.8 Hz, 1H), 7.35 (d,  $J$  = 7.2 Hz, 1H), 7.29 (d,  $J$  = 7.8 Hz, 1H), 7.11 (d,  $J$  = 7.8 Hz, 1H), 6.98 (t,  $J$  = 7.2 Hz, 2H), 6.85 (d,  $J$  = 12.6 Hz, 6H), 6.75 (dd,  $J$  = 28.2, 21.0 Hz, 5H), 6.51 (d,  $J$  = 8.4 Hz, 2H), 6.21 (d,  $J$  = 7.8 Hz, 2H).  $^{13}C$  NMR (150 MHz,  $CDCl_3$ )  $\delta$ =198.1, 155.9, 155.2, 143.6, 142.5, 140.1, 139.4, 134.1, 133.4, 132.3, 131.5, 131.4, 130.5, 130.0, 129.1, 129.1, 128.4, 127.0, 126.8, 126.2, 126.0, 126.0, 125.6, 123.1, 122.8, 122.7, 121.8, 118.8, 117.7. HRMS (ESI)  $m/z$  calcd for  $C_{39}H_{27}O_2^+$  ( $M+H$ ) $^+$  527.20056, found 527.20060.

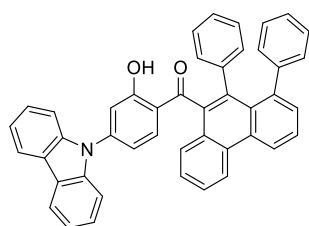

**(4-(9H-carbazol-9-yl)-2-hydroxyphenyl)(1,10-diphenylphenanthren-9-yl)methanone (138):**

Yield 93%; 57.2 mg; yellow solid; mp 205–208 °C; TLC (PET:EtOAc, 100:1 v/v):  $R_f$  = 0.3;  $^1H$  NMR (600 MHz,  $CDCl_3$ )  $\delta$ =12.14 (s, 1H), 8.86 (d,  $J$  = 8.4 Hz, 2H), 8.01 (d,  $J$  = 7.8 Hz, 2H), 7.83 (d,  $J$  = 7.8 Hz, 1H), 7.74 (s, 2H), 7.62 (t,  $J$  = 7.2 Hz, 1H), 7.47 (d,  $J$  = 6.6 Hz, 1H), 7.33 (s, 4H), 7.22 (s, 2H), 7.13 (d,  $J$  = 7.2 Hz, 1H), 7.07 (d,  $J$  = 7.2 Hz, 1H), 7.02–6.93 (m, 2H), 6.87 (d,  $J$  = 19.8 Hz, 4H), 6.81 (s, 1H), 6.74 (t,  $J$  = 6.6 Hz, 1H), 6.66–6.55 (m, 3H).  $^{13}C$  NMR (150 MHz,  $CDCl_3$ )  $\delta$ =203.9, 163.1, 144.3, 143.0, 142.6, 139.3, 138.9, 135.8, 135.5, 134.2, 132.2, 131.7, 130.8, 130.6, 129.6, 128.7, 128.4, 127.9, 127.4, 127.2, 126.8, 126.7, 126.6, 126.3, 125.8, 125.6, 123.6, 123.2, 121.8, 120.4, 120.0, 118.7, 115.9, 114.1, 109.8. HRMS (ESI)  $m/z$  calcd for  $C_{45}H_{30}NO_2^+$  ( $M+H$ ) $^+$  616.22711, found 616.22715.

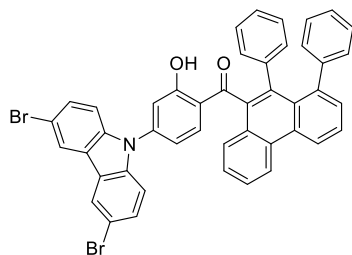

**(4-(3,6-dibromo-9H-carbazol-9-yl)-2-hydroxyphenyl)(1,10-diphenylphenanthren-9-yl)methanone (139):**

Yield 95%; 73.2 mg; yellow solid; mp 221–223 °C; TLC (PET:EtOAc, 100:1 v/v):  $R_f$  = 0.3;  $^1\text{H NMR}$  (600 MHz,  $\text{CDCl}_3$ )  $\delta$ =12.14 (s, 1H), 8.82 (d,  $J$  = 8.4 Hz, 2H), 7.97 (s, 2H), 7.79 (d,  $J$  = 7.8 Hz, 1H), 7.71 (s, 2H), 7.59 (t,  $J$  = 7.2 Hz, 1H), 7.44 (d,  $J$  = 6.6 Hz, 1H), 7.35 (d,  $J$  = 8.4 Hz, 2H), 7.16–7.01 (m, 4H), 6.95 (d,  $J$  = 6.6 Hz, 1H), 6.93–6.79 (m, 5H), 6.79–6.70 (m, 2H), 6.64–6.53 (m, 2H), 6.42 (d,  $J$  = 8.4 Hz, 1H).  $^{13}\text{C NMR}$  (150 MHz,  $\text{CDCl}_3$ )  $\delta$ =204.3, 163.3, 143.3, 143.1, 142.8, 139.1, 138.5, 136.0, 135.5, 134.6, 132.5, 132.0, 131.0, 130.8, 129.8, 129.4, 128.9, 128.5, 128.1, 127.7, 127.5, 127.1, 126.9, 126.8, 126.6, 125.9, 125.7, 124.2, 123.5, 123.1, 122.0, 119.3, 115.8, 114.3, 113.7, 111.6. HRMS (ESI)  $m/z$  calcd for  $\text{C}_{45}\text{H}_{27}\text{Br}_2\text{NO}_2^+$  ( $\text{M}$ ) $^+$  773.03877, found 773.03834.

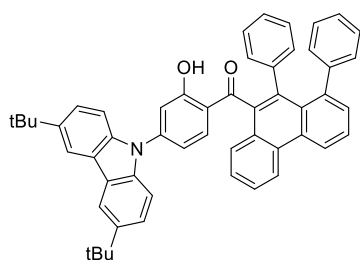

**(4-(3,6-di-tert-butyl-9H-carbazol-9-yl)-2-hydroxyphenyl)(1,10-diphenylphenanthren-9-yl)methanone (140):**

Yield 92%; 66.9 mg; yellow solid; mp 187–191 °C; TLC (PET:EtOAc, 100:1 v/v):  $R_f$  = 0.3;  $^1\text{H NMR}$  (600 MHz,  $\text{CDCl}_3$ )  $\delta$ =12.16 (s, 1H), 8.85 (d,  $J$  = 8.4 Hz, 2H), 8.06 (s, 2H), 7.84 (d,  $J$  = 7.8 Hz, 1H), 7.73 (dd,  $J$  = 13.2, 7.2 Hz, 2H), 7.62 (d,  $J$  = 7.2 Hz, 1H), 7.46 (d,  $J$  = 7.2 Hz, 1H), 7.39 (d,  $J$  = 8.4 Hz, 2H), 7.31 (d,  $J$  = 8.4 Hz, 2H), 7.13 (d,  $J$  = 7.2 Hz, 1H), 7.07 (d,  $J$  = 6.6 Hz, 1H), 6.97 (dd,  $J$  = 16.2, 9.6 Hz, 2H), 6.87 (dd,  $J$  = 26.4, 7.2 Hz, 4H), 6.81 (d,  $J$  = 6.6 Hz, 1H), 6.75 (t,  $J$  = 7.2 Hz, 1H), 6.62 (dd,  $J$  = 26.4, 7.2 Hz, 3H), 1.42 (s, 18H).  $^{13}\text{C NMR}$  (150 MHz,  $\text{CDCl}_3$ )  $\delta$ =204.0, 163.5, 145.1, 143.7, 143.2, 142.8, 139.1, 137.9, 136.0, 135.8, 134.3, 132.5, 132.0, 131.0, 130.8, 129.8, 128.9, 128.7, 128.2, 127.7, 127.4, 127.0, 126.9, 126.8, 126.7, 126.6, 125.9, 125.8, 123.9, 123.7, 123.4, 122.0, 118.6, 116.2, 115.7, 113.6, 109.6, 34.7, 31.9. HRMS (ESI)  $m/z$  calcd for  $\text{C}_{53}\text{H}_{46}\text{NO}_2^+$  ( $\text{M}+\text{H}$ ) $^+$  728.35231, found 728.35134.

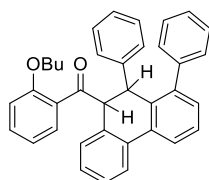

**(2-butoxyphenyl)(1,10-diphenyl-9,10-dihydrophenanthren-9-yl)methanone (141):**

white solid; mp 125–128 °C; TLC (PET:EtOAc, 30:1 v/v):  $R_f$  = 0.3;  $^1\text{H NMR}$  (600 MHz,  $\text{CDCl}_3$ )  $\delta$ =7.85 (dd,  $J$  = 14.4, 7.8 Hz, 2H), 7.36 (t,  $J$  = 7.8 Hz, 1H), 7.27 (d,  $J$  = 4.2 Hz, 2H), 7.16–7.10 (m, 2H), 7.08–7.03 (m, 3H), 6.98 (s, 4H), 6.93 (d,  $J$  = 7.2 Hz, 1H), 6.80 (dd,  $J$  = 13.8, 7.8 Hz, 3H), 6.74 (d,  $J$  = 25.8 Hz, 3H), 4.92 (s, 1H), 4.65 (s,

1H), 4.03–3.91 (m, 2H), 1.70 (dd,  $J = 14.4, 7.2$  Hz, 2H), 1.39 (dd,  $J = 13.8, 7.2$  Hz, 2H), 0.89 (t,  $J = 7.2$  Hz, 3H).  $^{13}\text{C}$  NMR (150 MHz,  $\text{CDCl}_3$ )  $\delta$ =203.0, 156.2, 143.1, 142.7, 140.9, 135.3, 134.8, 133.9, 132.3, 130.4, 129.9, 129.7, 129.0, 129.0, 128.1, 128.0, 127.9, 127.8, 127.5, 127.3, 126.7, 126.0, 124.0, 123.5, 120.9, 111.9, 68.3, 59.9, 43.2, 31.2, 19.4, 13.9. HRMS (ESI)  $m/z$  calcd for  $\text{C}_{37}\text{H}_{32}\text{O}_2\text{Na}^+$  ( $\text{M}+\text{Na}$ ) $^+$  531.22945, found 531.22948.

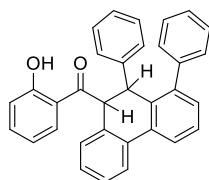

**(1,10-diphenyl-9,10-dihydrophenanthren-9-yl)(2-hydroxyphenyl)methanone (142):**

white solid; mp 139–143°C; TLC (PET:EtOAc, 20:1 v/v):  $R_f = 0.3$ ;  $^1\text{H}$  NMR (600 MHz,  $\text{CDCl}_3$ )  $\delta$ =11.92 (s, 1H), 7.96 (dd,  $J = 15.6, 7.8$  Hz, 3H), 7.46 (t,  $J = 7.8$  Hz, 1H), 7.38 (dt,  $J = 15.6, 7.8$  Hz, 2H), 7.15 (dd,  $J = 15.0, 7.8$  Hz, 2H), 7.10 (d,  $J = 7.2$  Hz, 1H), 7.00 (ddd,  $J = 24.0, 13.2, 5.4$  Hz, 7H), 6.89 (t,  $J = 7.2$  Hz, 1H), 6.75 (d,  $J = 3.0$  Hz, 2H), 6.69 (d,  $J = 6.0$  Hz, 2H), 4.94 (s, 1H), 4.67 (s, 1H).  $^{13}\text{C}$  NMR (150 MHz,  $\text{CDCl}_3$ )  $\delta$ =204.4, 163.2, 142.8, 142.2, 140.7, 136.5, 136.3, 134.7, 132.7, 131.1, 129.9, 129.7, 129.7, 128.9, 128.7, 128.4, 128.2, 127.7, 127.6, 126.9, 126.7, 124.3, 123.4, 119.2, 119.0, 117.6, 54.3, 44.9. HRMS (ESI)  $m/z$  calcd for  $\text{C}_{33}\text{H}_{25}\text{O}_2^+$  ( $\text{M}+\text{H}$ ) $^+$  453.18491, found 453.18501.

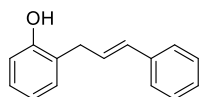

**2-cinnamylphenol (143):**

yellow oil;  $^1\text{H}$  NMR (600 MHz,  $\text{CDCl}_3$ )  $\delta$ =7.31 (d,  $J = 7.8$  Hz, 2H), 7.25 (t,  $J = 7.8$  Hz, 2H), 7.20–7.12 (m, 2H), 7.10 (t,  $J = 7.8$  Hz, 1H), 6.88 (t,  $J = 7.2$  Hz, 1H), 6.76 (d,  $J = 7.8$  Hz, 1H), 6.46 (d,  $J = 16.2$  Hz, 1H), 6.36 (dd,  $J = 14.4, 7.8$  Hz, 1H), 5.13 (s, 1H), 3.52 (d,  $J = 6.6$  Hz, 2H).  $^{13}\text{C}$  NMR (150 MHz,  $\text{CDCl}_3$ )  $\delta$ =153.9, 137.2, 131.5, 130.5, 128.6, 128.0, 127.9, 127.4, 126.3, 125.9, 121.1, 115.8, 34.0. HRMS (ESI)  $m/z$  calcd for  $\text{C}_{15}\text{H}_{15}\text{O}^+$  ( $\text{M}+\text{H}$ ) $^+$  211.11174, found 211.11148.

**4.7 Crystallographic data and molecular structure of compounds**

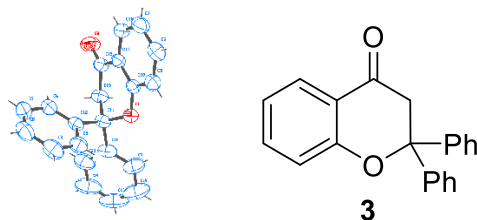

**Supplementary Figure 13. Crystal structure.** The X-ray crystal structure of **3**.

Crystal Data for Compound **3**: CCDC 1970136 contains the supplementary crystallographic data for this paper. These data can be obtained free of charge from The Cambridge Crystallographic.

---

|                                                               |                |                    |                |
|---------------------------------------------------------------|----------------|--------------------|----------------|
| Bond precision:                                               | C-C = 0.0034 Å | Wavelength=0.71073 |                |
| Cell:                                                         | a=13.205 (11)  | b=11.829 (10)      | c=20.597 (17)  |
|                                                               | alpha=90       | beta=95.475 (12)   | gamma=90       |
| Temperature:                                                  | 296 K          |                    |                |
|                                                               | Calculated     | Reported           |                |
| Volume                                                        | 3203 (5)       | 3203 (5)           |                |
| Space group                                                   | C 2/c          | C 1 2/c 1          |                |
| Hall group                                                    | -C 2yc         | -C 2yc             |                |
| Moiety formula                                                | C21 H16 O2     | C21 H16 O2         |                |
| Sum formula                                                   | C21 H16 O2     | C21 H16 O2         |                |
| Mr                                                            | 300.34         | 300.34             |                |
| Dx, g cm <sup>-3</sup>                                        | 1.246          | 1.246              |                |
| Z                                                             | 8              | 8                  |                |
| Mu (mm <sup>-1</sup> )                                        | 0.079          | 0.079              |                |
| F000                                                          | 1264.0         | 1264.0             |                |
| F000'                                                         | 1264.57        |                    |                |
| h, k, lmax                                                    | 19, 17, 30     | 19, 17, 29         |                |
| Nref                                                          | 5380           | 4884               |                |
| Tmin, Tmax                                                    |                | 0.622, 0.746       |                |
| Tmin'                                                         |                |                    |                |
| Correction method= # Reported T Limits: Tmin=0.622 Tmax=0.746 |                |                    |                |
| AbsCorr = MULTI-SCAN                                          |                |                    |                |
| Data completeness=                                            | 0.908          | Theta (max)=       | 31.619         |
| R (reflections)=                                              | 0.0729 ( 3587) | wR2 (reflections)= | 0.1953 ( 4884) |
| S =                                                           | 1.042          | Npar=              | 209            |

---

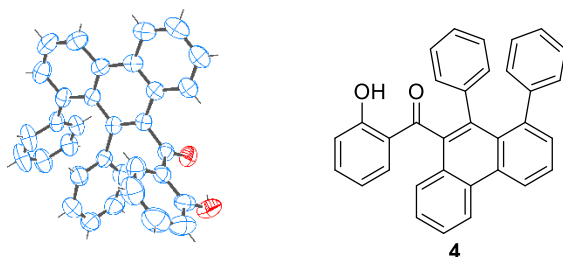

**Supplementary Figure 14. Crystal structure.** The X-ray crystal structure of **4**.

Crystal Data for Compound **4**: CCDC 1964456 contains the supplementary crystallographic data for this paper. These data can be obtained free of charge from The Cambridge Crystallographic.

---

|                 |                |                    |             |
|-----------------|----------------|--------------------|-------------|
| Bond precision: | C-C = 0.0044 Å | Wavelength=0.71073 |             |
| Cell:           | a=9.9499(19)   | b=10.724(2)        | c=22.211(4) |
|                 | alpha=90       | beta=90            | gamma=90    |
| Temperature:    | 273 K          |                    |             |

  

|                        | Calculated   | Reported     |
|------------------------|--------------|--------------|
| Volume                 | 2370.0(8)    | 2370.0(8)    |
| Space group            | P 21 21 21   | P 21 21 21   |
| Hall group             | P 2ac 2ab    | P 2ac 2ab    |
| Moiety formula         | C33 H22 O2   | ?            |
| Sum formula            | C33 H22 O2   | C33 H22 O2   |
| Mr                     | 450.51       | 450.50       |
| Dx, g cm <sup>-3</sup> | 1.263        | 1.263        |
| Z                      | 4            | 4            |
| Mu (mm <sup>-1</sup> ) | 0.077        | 0.077        |
| F000                   | 944.0        | 944.0        |
| F000'                  | 944.41       |              |
| h, k, lmax             | 12, 13, 28   | 12, 13, 28   |
| Nref                   | 5388[ 3050]  | 5363         |
| Tmin, Tmax             | 0.983, 0.986 | 0.864, 0.864 |
| Tmin'                  | 0.983        |              |

  

Correction method= # Reported T Limits: Tmin=0.864 Tmax=0.864  
AbsCorr = MULTI-SCAN

  

|                               |                                 |
|-------------------------------|---------------------------------|
| Data completeness= 1.76/1.00  | Theta(max)= 27.426              |
| R(reflections)= 0.0435( 3852) | wR2(reflections)= 0.1153( 5363) |
| S = 0.968                     | Npar= 319                       |

---

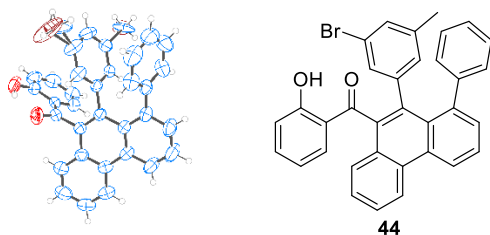

**Supplementary Figure 15. Crystal structure.** The X-ray crystal structure of **44**.

Crystal Data for Compound **44**: CCDC 1961529 contains the supplementary crystallographic data for this paper. These data can be obtained free of charge from The Cambridge Crystallographic.





---

Bond precision: C-C = 0.0026 Å                      Wavelength=0.71073

Cell:                      a=10.524(2)                      b=10.546(2)                      c=11.504(3)  
                                  alpha=82.680(4)                      beta=79.677(3)                      gamma=69.908(3)

Temperature: 296 K

|                        | Calculated    | Reported      |
|------------------------|---------------|---------------|
| Volume                 | 1176.7(4)     | 1176.7(4)     |
| Space group            | P -1          | P -1          |
| Hall group             | -P 1          | -P 1          |
| Moiety formula         | C33 H19 F3 O2 | ?             |
| Sum formula            | C33 H19 F3 O2 | C33 H19 F3 O2 |
| Mr                     | 504.48        | 504.48        |
| Dx, g cm <sup>-3</sup> | 1.424         | 1.424         |
| Z                      | 2             | 2             |
| Mu (mm <sup>-1</sup> ) | 0.104         | 0.104         |
| F000                   | 520.0         | 520.0         |
| F000'                  | 520.30        |               |
| h, k, lmax             | 13, 13, 14    | 13, 13, 14    |
| Nref                   | 4711          | 4634          |
| Tmin, Tmax             | 0.977, 0.981  | 0.864, 0.864  |
| Tmin'                  | 0.977         |               |

Correction method= # Reported T Limits: Tmin=0.864 Tmax=0.864  
 AbsCorr = MULTI-SCAN

Data completeness= 0.984                      Theta(max)= 26.184

R(reflections)= 0.0472( 3383)                      wR2(reflections)= 0.1668( 4634)

S = 0.994                      Npar= 346

---

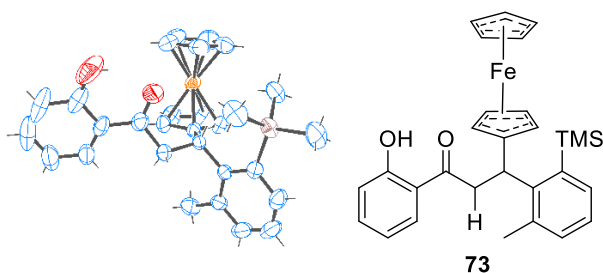

**Supplementary Figure 17. Crystal structure.** The X-ray crystal structure of **73**.

Crystal Data for Compound **73**: CCDC 1969923 contains the supplementary crystallographic data for this paper. These data can be obtained free of charge from The Cambridge Crystallographic.

---

Bond precision: C-C = 0.0044 Å                      Wavelength=0.71073

Cell:                      a=10.5887(16)                      b=11.2010(17)                      c=11.3216(17)  
                                    alpha=83.063(2)                      beta=88.838(2)                      gamma=72.895(2)

Temperature:                      296 K

|                        | Calculated                                           | Reported                                             |
|------------------------|------------------------------------------------------|------------------------------------------------------|
| Volume                 | 1273.8(3)                                            | 1273.8(3)                                            |
| Space group            | P -1                                                 | P -1                                                 |
| Hall group             | -P 1                                                 | -P 1                                                 |
| Moiety formula         | C <sub>29</sub> H <sub>32</sub> Fe O <sub>2</sub> Si | C <sub>29</sub> H <sub>32</sub> Fe O <sub>2</sub> Si |
| Sum formula            | C <sub>29</sub> H <sub>32</sub> Fe O <sub>2</sub> Si | C <sub>29</sub> H <sub>32</sub> Fe O <sub>2</sub> Si |
| Mr                     | 496.49                                               | 496.48                                               |
| Dx, g cm <sup>-3</sup> | 1.294                                                | 1.294                                                |
| Z                      | 2                                                    | 2                                                    |
| Mu (mm <sup>-1</sup> ) | 0.662                                                | 0.662                                                |
| F000                   | 524.0                                                | 524.0                                                |
| F000'                  | 525.02                                               |                                                      |
| h, k, lmax             | 15, 16, 16                                           | 15, 16, 16                                           |
| Nref                   | 8771                                                 | 7786                                                 |
| Tmin, Tmax             | 0.924, 0.936                                         | 0.545, 0.746                                         |
| Tmin'                  | 0.924                                                |                                                      |

Correction method= # Reported T Limits: Tmin=0.545 Tmax=0.746  
AbsCorr = MULTI-SCAN

Data completeness= 0.888                      Theta(max)= 31.888

R(reflections)= 0.0590( 6034)                      wR2(reflections)= 0.1792( 7786)

S = 1.116                      Npar= 304

---

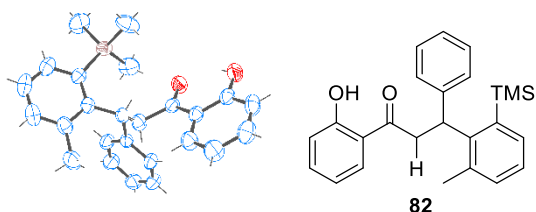

**Supplementary Figure 18. Crystal structure.** The X-ray crystal structure of **82**.

Crystal Data for Compound **82**: CCDC 1969916 contains the supplementary crystallographic data for this paper. These data can be obtained free of charge from The Cambridge Crystallographic.

---

|                 |                 |                    |                 |
|-----------------|-----------------|--------------------|-----------------|
| Bond precision: | C-C = 0.0035 Å  | Wavelength=0.71073 |                 |
| Cell:           | a=8.756(4)      | b=9.898(4)         | c=13.339(5)     |
|                 | alpha=86.809(6) | beta=88.469(6)     | gamma=70.617(6) |
| Temperature:    | 296 K           |                    |                 |

  

|                        | Calculated                                        | Reported                                          |
|------------------------|---------------------------------------------------|---------------------------------------------------|
| Volume                 | 1088.8(8)                                         | 1088.8(7)                                         |
| Space group            | P -1                                              | P -1                                              |
| Hall group             | -P 1                                              | -P 1                                              |
| Moiety formula         | C <sub>25</sub> H <sub>28</sub> O <sub>2</sub> Si | ?                                                 |
| Sum formula            | C <sub>25</sub> H <sub>28</sub> O <sub>2</sub> Si | C <sub>25</sub> H <sub>28</sub> O <sub>2</sub> Si |
| Mr                     | 388.56                                            | 388.56                                            |
| Dx, g cm <sup>-3</sup> | 1.185                                             | 1.185                                             |
| Z                      | 2                                                 | 2                                                 |
| Mu (mm <sup>-1</sup> ) | 0.125                                             | 0.125                                             |
| F000                   | 416.0                                             | 416.0                                             |
| F000'                  | 416.32                                            |                                                   |
| h, k, lmax             | 10, 11, 16                                        | 10, 11, 16                                        |
| Nref                   | 4050                                              | 3993                                              |
| Tmin, Tmax             | 0.970, 0.975                                      |                                                   |
| Tmin'                  | 0.963                                             |                                                   |

Correction method= Not given

Data completeness= 0.986                      Theta(max)= 25.499

R(reflections)= 0.0559( 3265)              wR2(reflections)= 0.1817( 3993)

S = 1.070                                          Npar= 259

---

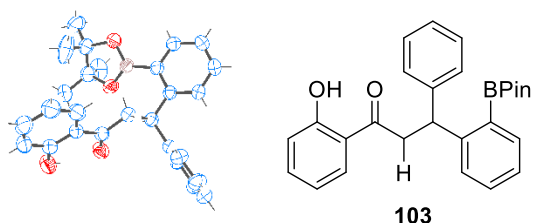

**Supplementary Figure 19. Crystal structure.** The X-ray crystal structure of **103**.

Crystal Data for Compound **103**: CCDC 1969930 contains the supplementary crystallographic data for this paper. These data can be obtained free of charge from The Cambridge Crystallographic.

---

|                 |                |                    |              |
|-----------------|----------------|--------------------|--------------|
| Bond precision: | C-C = 0.0051 Å | Wavelength=0.71073 |              |
| Cell:           | a=10.274 (2)   | b=24.480 (5)       | c=10.241 (2) |
|                 | alpha=90       | beta=117.997 (5)   | gamma=90     |
| Temperature:    | 296 K          |                    |              |

  

|                        | Calculated   | Reported     |
|------------------------|--------------|--------------|
| Volume                 | 2274.3 (8)   | 2274.2 (9)   |
| Space group            | P 21/c       | P 1 21/c 1   |
| Hall group             | -P 2ybc      | -P 2ybc      |
| Moiety formula         | C27 H29 B O4 | C27 H29 B O4 |
| Sum formula            | C27 H29 B O4 | C27 H29 B O4 |
| Mr                     | 428.31       | 428.31       |
| Dx, g cm <sup>-3</sup> | 1.251        | 1.251        |
| Z                      | 4            | 4            |
| Mu (mm <sup>-1</sup> ) | 0.082        | 0.082        |
| F000                   | 912.0        | 912.0        |
| F000'                  | 912.42       |              |
| h, k, lmax             | 12, 29, 12   | 12, 28, 12   |
| Nref                   | 4008         | 3894         |
| Tmin, Tmax             | 0.990, 0.992 | 0.621, 0.745 |
| Tmin'                  | 0.990        |              |

Correction method= # Reported T Limits: Tmin=0.621 Tmax=0.745  
AbsCorr = MULTI-SCAN

Data completeness= 0.972                      Theta(max)= 24.994

R(reflections)= 0.0638 ( 2523)              wR2(reflections)= 0.1681 ( 3894)

S = 1.029                                              Npar= 294

---

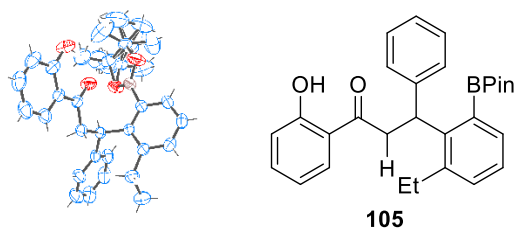

**Supplementary Figure 20. Crystal structure.** The X-ray crystal structure of **105**.

Crystal Data for Compound **105**: CCDC 1969931 contains the supplementary crystallographic data for this paper. These data can be obtained free of charge from The Cambridge Crystallographic.

---

|                 |                  |                    |                  |
|-----------------|------------------|--------------------|------------------|
| Bond precision: | C-C = 0.0028 Å   | Wavelength=0.71073 |                  |
| Cell:           | a=9.9824 (13)    | b=11.2719 (14)     | c=12.8941 (16)   |
|                 | alpha=76.855 (2) | beta=78.253 (2)    | gamma=67.266 (2) |
| Temperature:    | 291 K            |                    |                  |

  

|                        | Calculated   | Reported     |
|------------------------|--------------|--------------|
| Volume                 | 1292.2 (3)   | 1292.2 (3)   |
| Space group            | P -1         | P -1         |
| Hall group             | -P 1         | -P 1         |
| Moiety formula         | C29 H33 B O4 | C29 H33 B O4 |
| Sum formula            | C29 H33 B O4 | C29 H33 B O4 |
| Mr                     | 456.36       | 456.36       |
| Dx, g cm <sup>-3</sup> | 1.173        | 1.173        |
| Z                      | 2            | 2            |
| Mu (mm <sup>-1</sup> ) | 0.076        | 0.076        |
| F000                   | 488.0        | 488.0        |
| F000'                  | 488.22       |              |
| h, k, lmax             | 12, 13, 15   | 12, 13, 15   |
| Nref                   | 4811         | 4751         |
| Tmin, Tmax             | 0.982, 0.985 | 0.687, 0.746 |
| Tmin'                  | 0.977        |              |

  

Correction method= # Reported T Limits: Tmin=0.687 Tmax=0.746  
AbsCorr = MULTI-SCAN

  

|                               |                                 |
|-------------------------------|---------------------------------|
| Data completeness= 0.988      | Theta(max)= 25.500              |
| R(reflections)= 0.0517( 3966) | wR2(reflections)= 0.1707( 4751) |
| S = 1.055                     | Npar= 374                       |

---

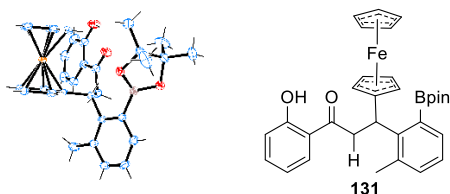

**Supplementary Figure 21. Crystal structure.** The X-ray crystal structure of **131**.

Crystal Data for Compound **131**: CCDC 1974984 contains the supplementary crystallographic data for this paper. These data can be obtained free of charge from The Cambridge Crystallographic.

---

Bond precision: C-C = 0.0032 Å                      Wavelength=0.71073

Cell:                      a=10.1618 (13)                      b=11.4078 (15)                      c=13.2712 (17)  
                                          alpha=88.528 (2)                      beta=79.496 (2)                      gamma=64.493 (2)

Temperature: 296 K

|                        | Calculated      | Reported        |
|------------------------|-----------------|-----------------|
| Volume                 | 1362.8 (3)      | 1362.8 (3)      |
| Space group            | P -1            | P -1            |
| Hall group             | -P 1            | -P 1            |
| Moiety formula         | C32 H35 B Fe O4 | C32 H35 B Fe O4 |
| Sum formula            | C32 H35 B Fe O4 | C32 H35 B Fe O4 |
| Mr                     | 550.26          | 550.26          |
| Dx, g cm <sup>-3</sup> | 1.341           | 1.341           |
| Z                      | 2               | 2               |
| Mu (mm <sup>-1</sup> ) | 0.589           | 0.589           |
| F000                   | 580.0           | 580.0           |
| F000'                  | 580.91          |                 |
| h, k, lmax             | 12, 13, 16      | 12, 13, 16      |
| Nref                   | 5065            | 5002            |
| Tmin, Tmax             | 0.932, 0.943    | 0.644, 0.746    |
| Tmin'                  | 0.932           |                 |

Correction method= # Reported T Limits: Tmin=0.644 Tmax=0.746  
 AbsCorr = MULTI-SCAN

Data completeness= 0.988                      Theta (max)= 25.500

R(reflections)= 0.0376 ( 4574)                      wR2(reflections)= 0.1197 ( 5002)

S = 1.157                      Npar= 350

---

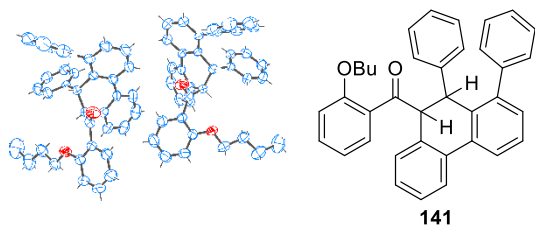

**Supplementary Figure 22. Crystal structure.** The X-ray crystal structure of **141**.

Crystal Data for Compound **141**: CCDC 1961844 contains the supplementary crystallographic data for this paper. These data can be obtained free of charge from The Cambridge Crystallographic.

---

Bond precision: C-C = 0.0051 A

Wavelength=0.71073

Cell: a=10.146(2) b=14.310(3) c=20.839(4)  
alpha=105.420(4) beta=97.063(5) gamma=104.487(4)  
Temperature: 296 K

|                | Calculated   | Reported     |
|----------------|--------------|--------------|
| Volume         | 2765.2(10)   | 2765.2(10)   |
| Space group    | P -1         | P -1         |
| Hall group     | -P 1         | -P 1         |
| Moiety formula | C37 H32 O2   | C37 H32 O2   |
| Sum formula    | C37 H32 O2   | C37 H32 O2   |
| Mr             | 508.63       | 508.62       |
| Dx, g cm-3     | 1.222        | 1.222        |
| Z              | 4            | 4            |
| Mu (mm-1)      | 0.074        | 0.074        |
| F000           | 1080.0       | 1080.0       |
| F000'          | 1080.44      |              |
| h, k, lmax     | 11, 16, 24   | 11, 16, 24   |
| Nref           | 9203         | 8883         |
| Tmin, Tmax     | 0.991, 0.993 | 0.603, 0.745 |
| Tmin'          | 0.991        |              |

Correction method= # Reported T Limits: Tmin=0.603 Tmax=0.745  
AbsCorr = MULTI-SCAN

Data completeness= 0.965 Theta(max)= 24.499

R(reflections)= 0.0596( 4358) wR2(reflections)= 0.1423( 8883)

S = 0.988 Npar= 705

---



## 4.8 $^1\text{H}$ and $^{13}\text{C}$ NMR spectra of compounds

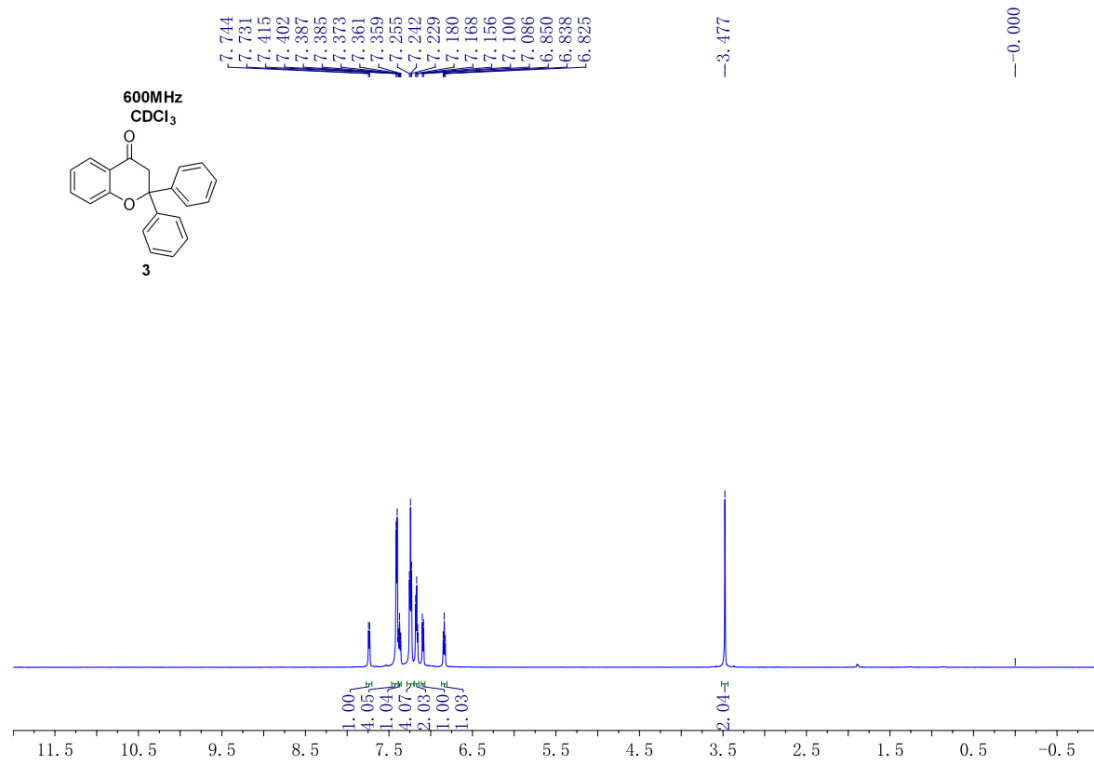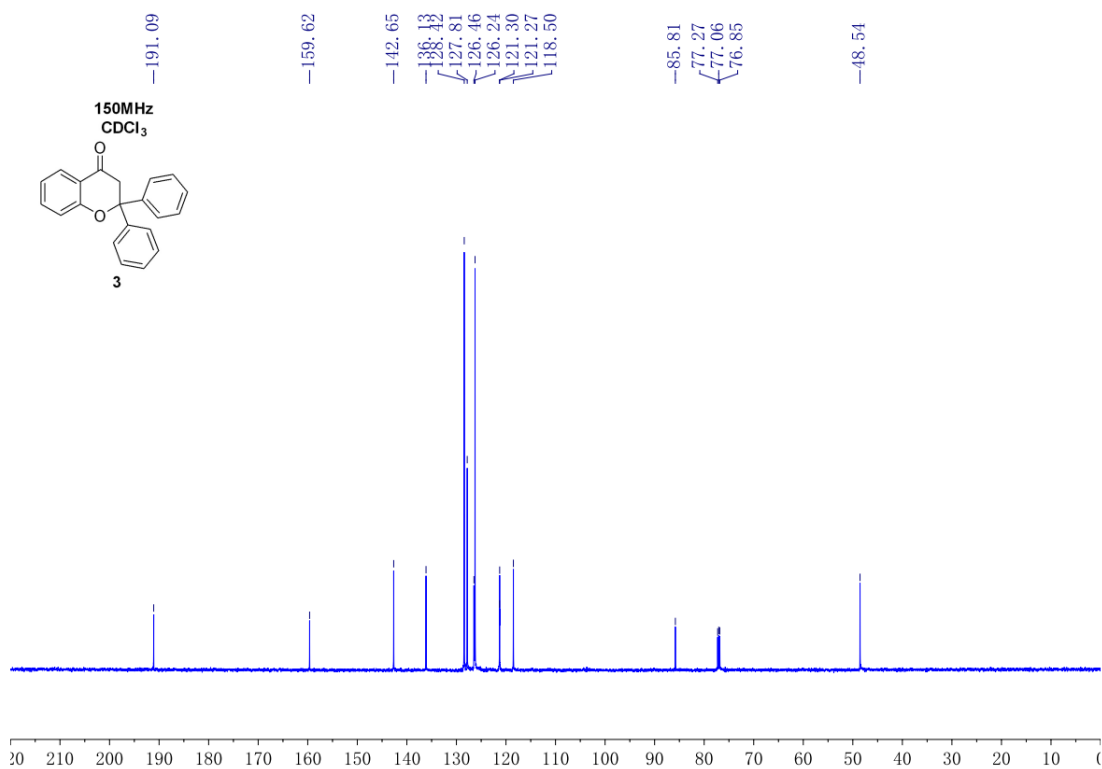

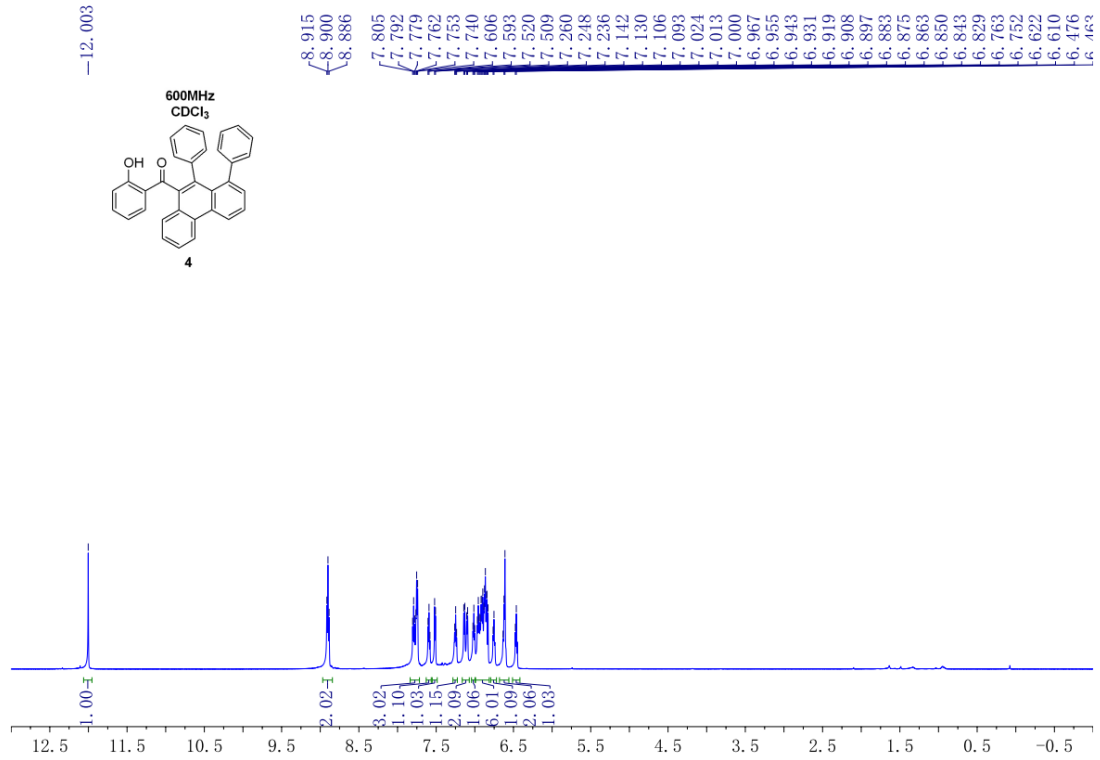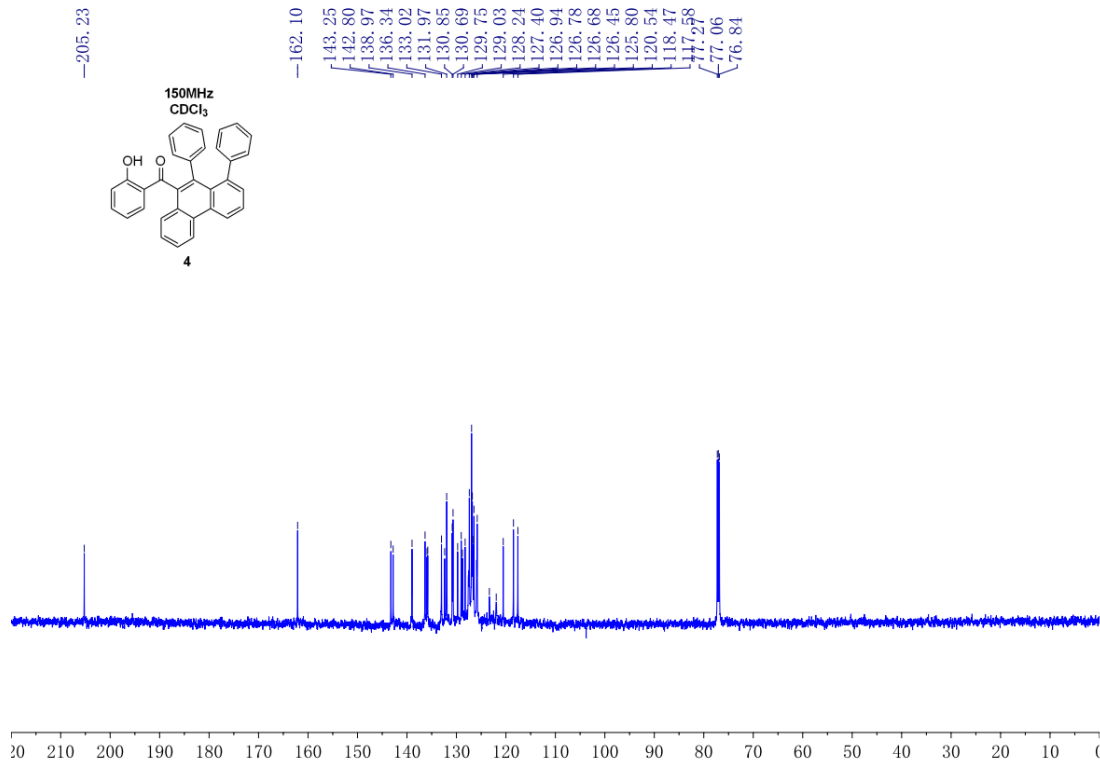

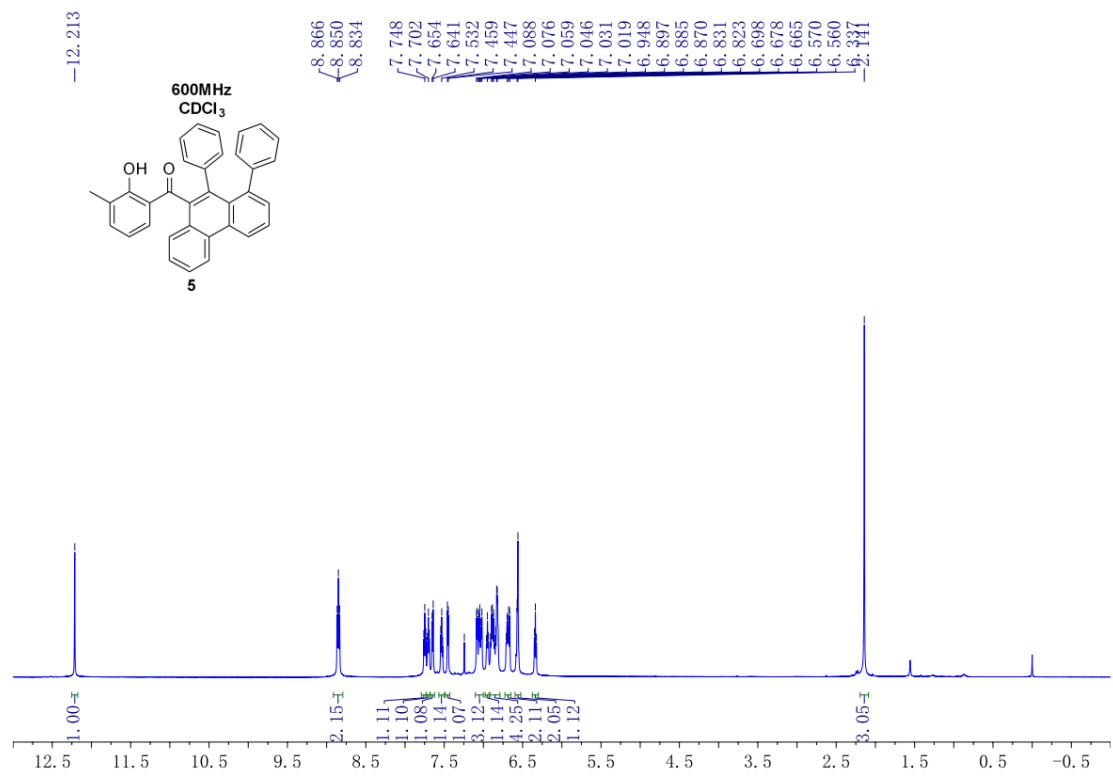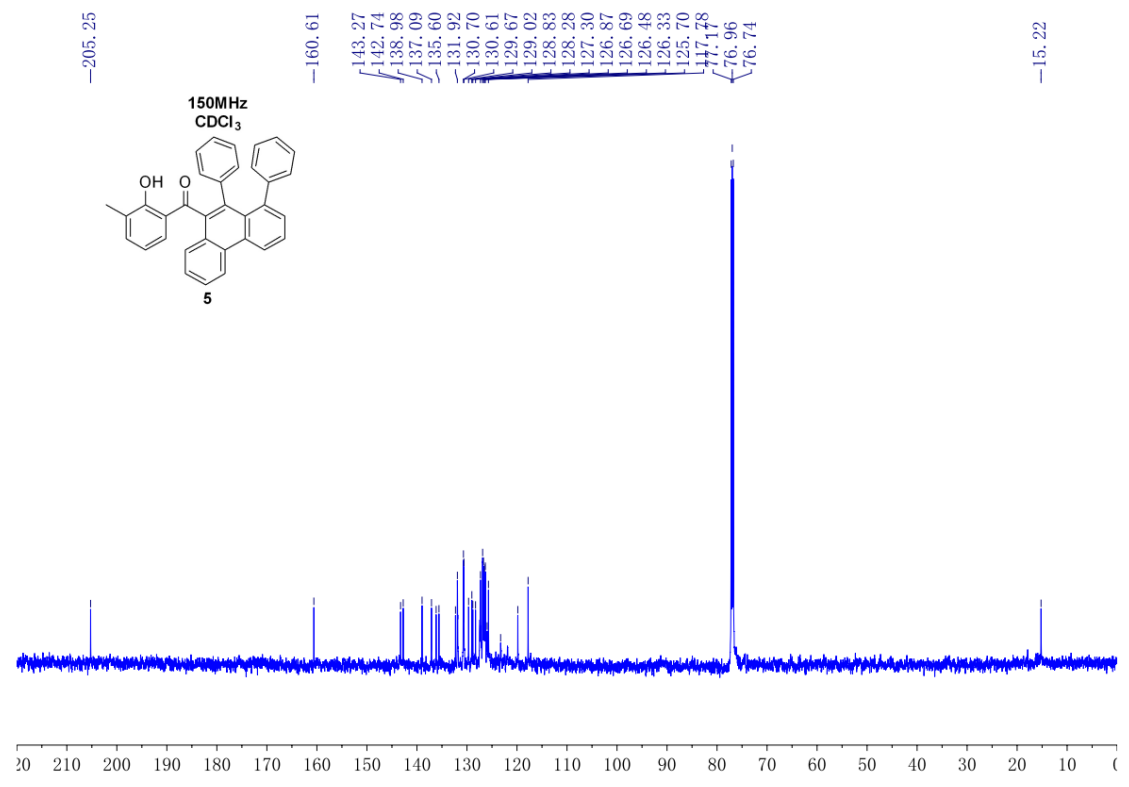

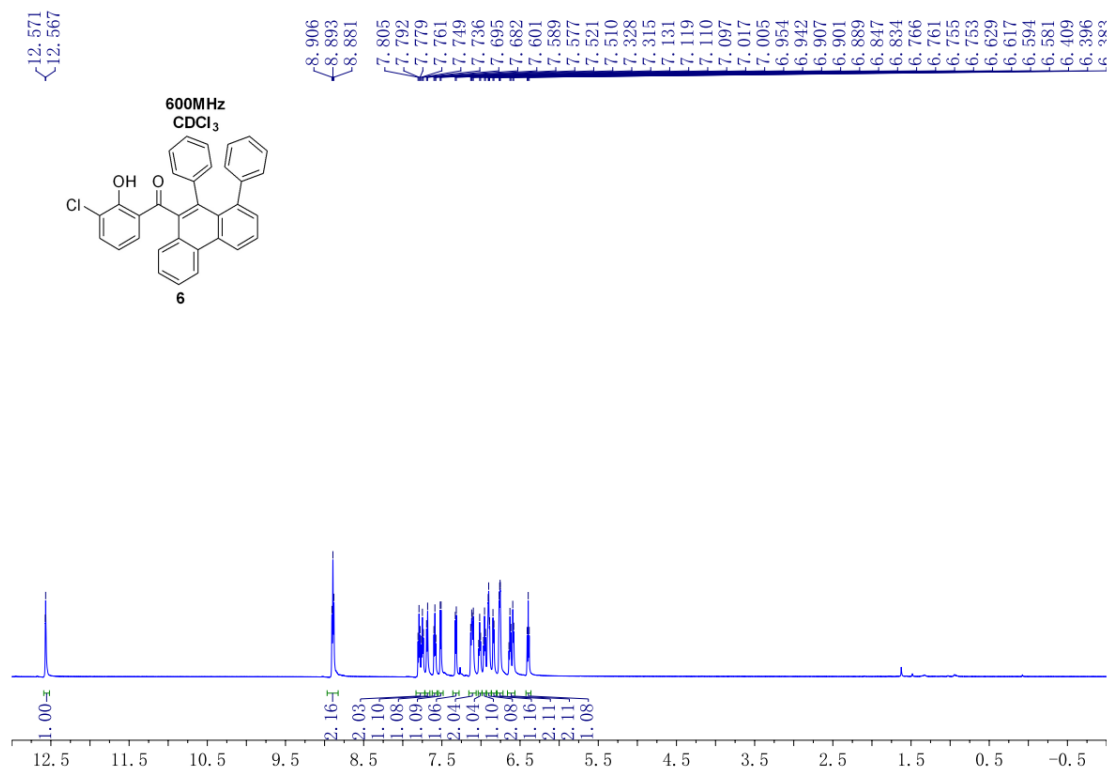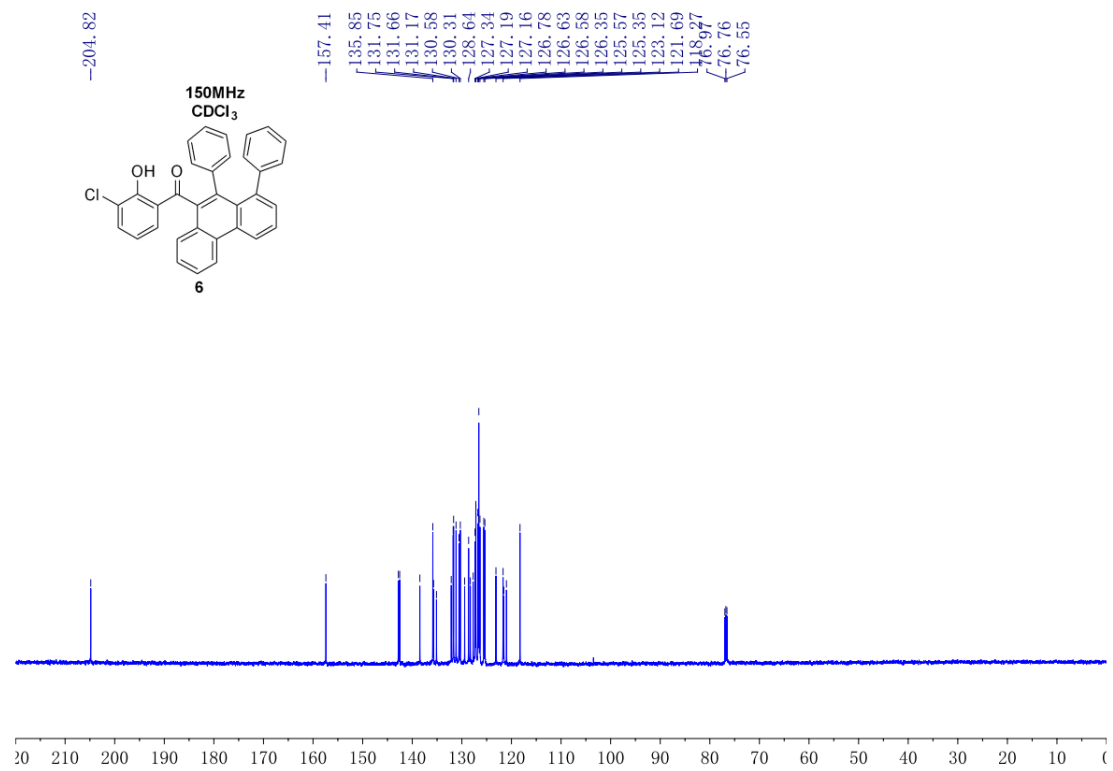

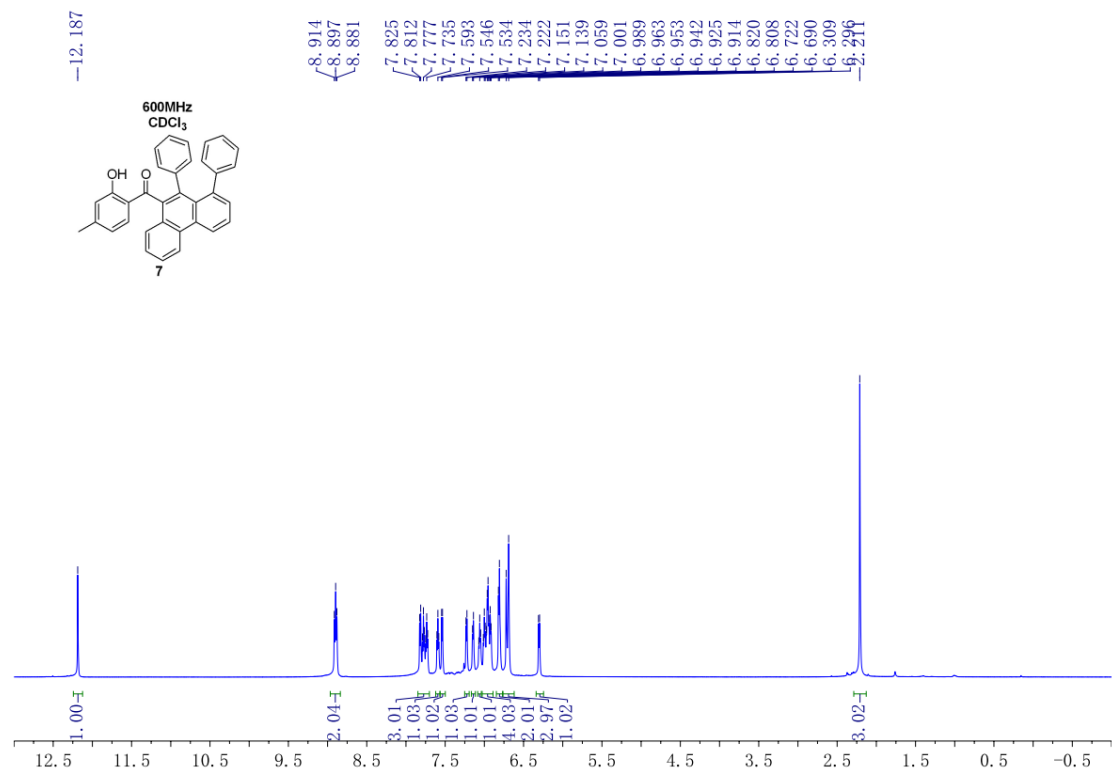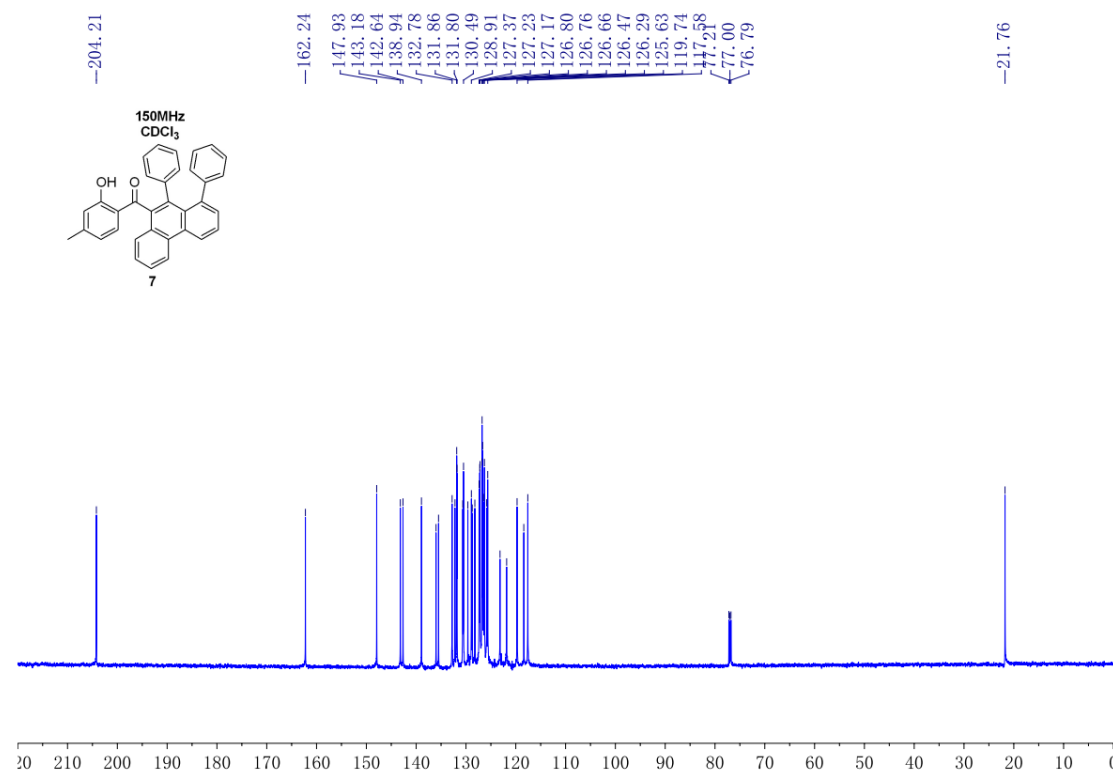

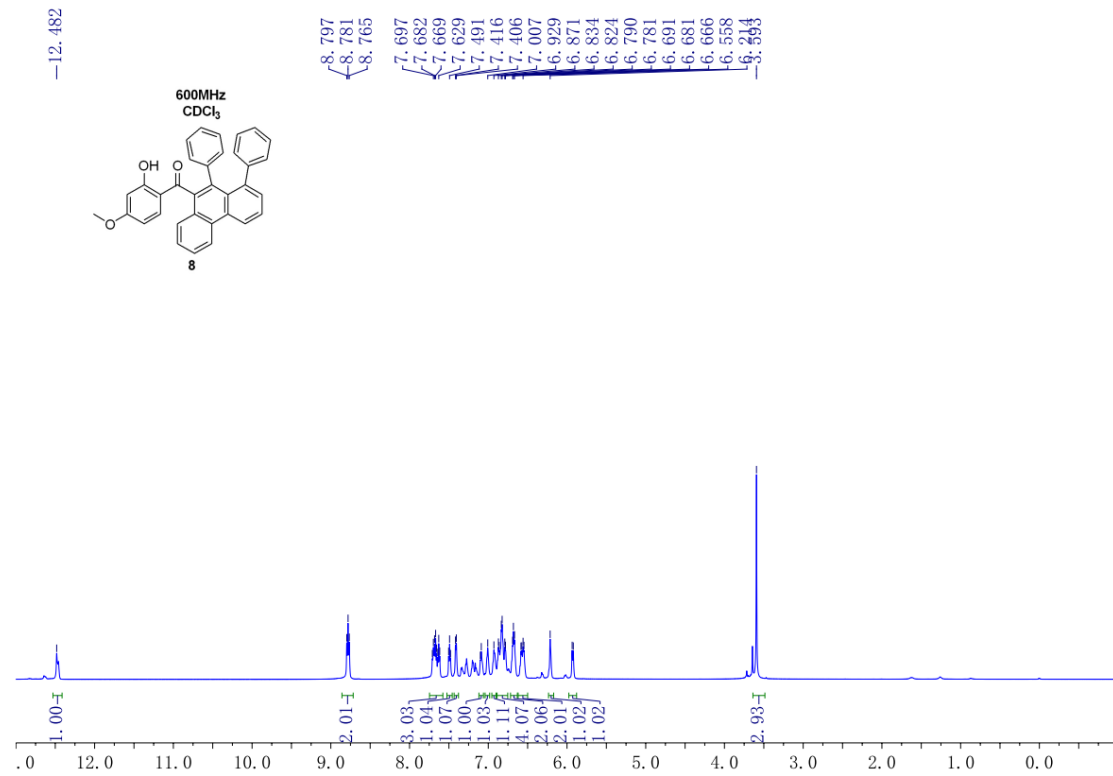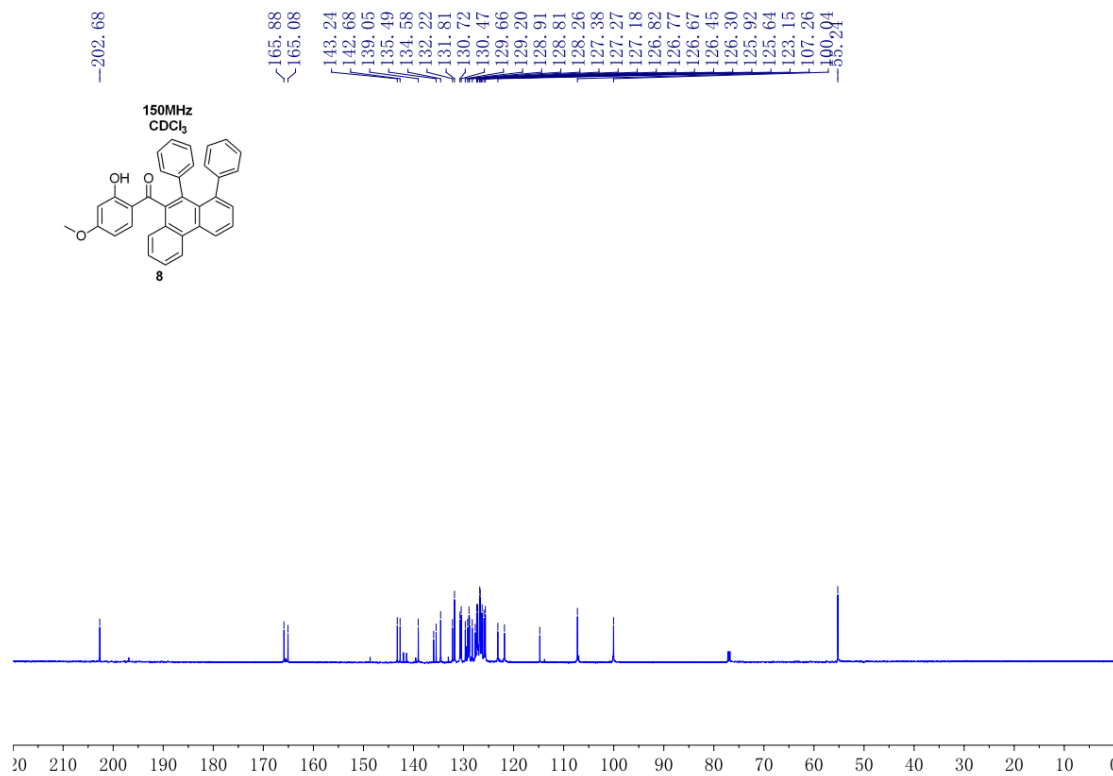

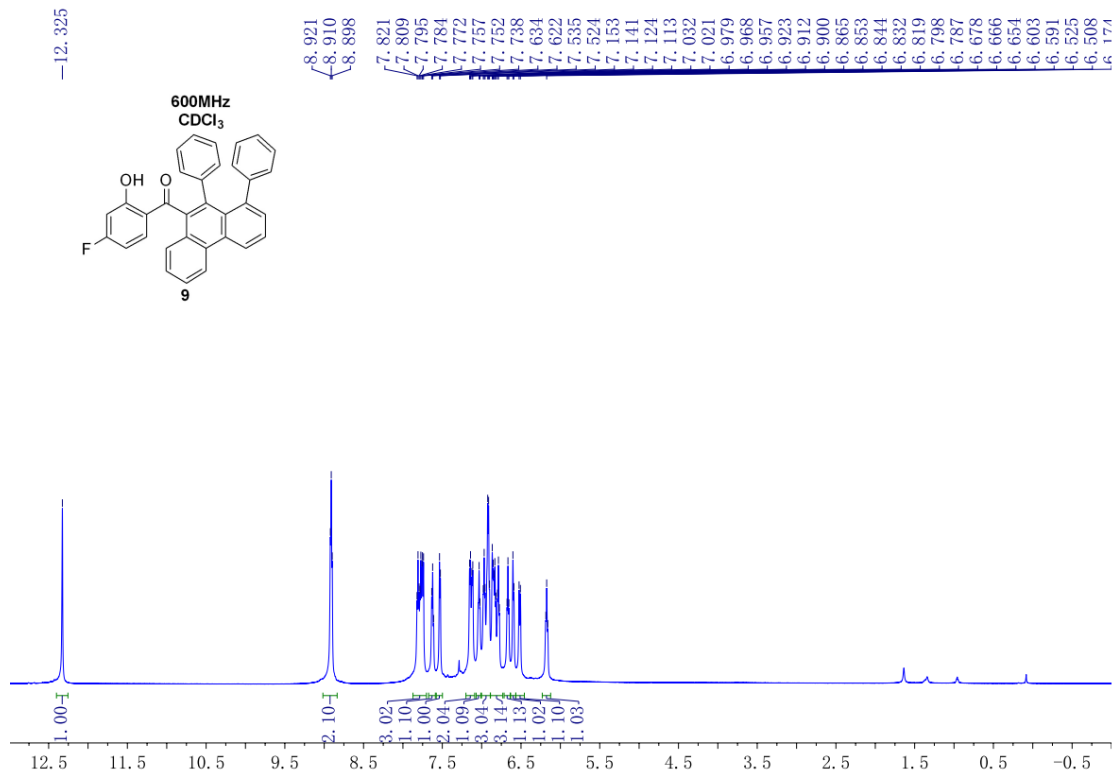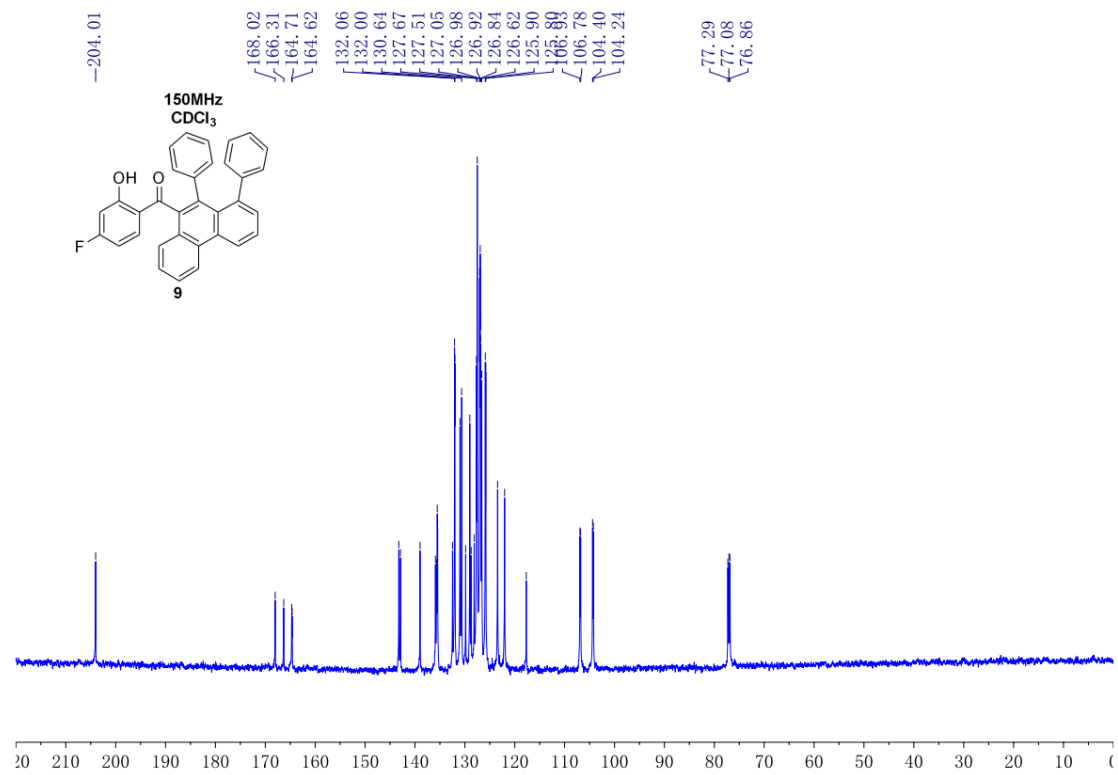

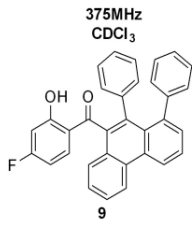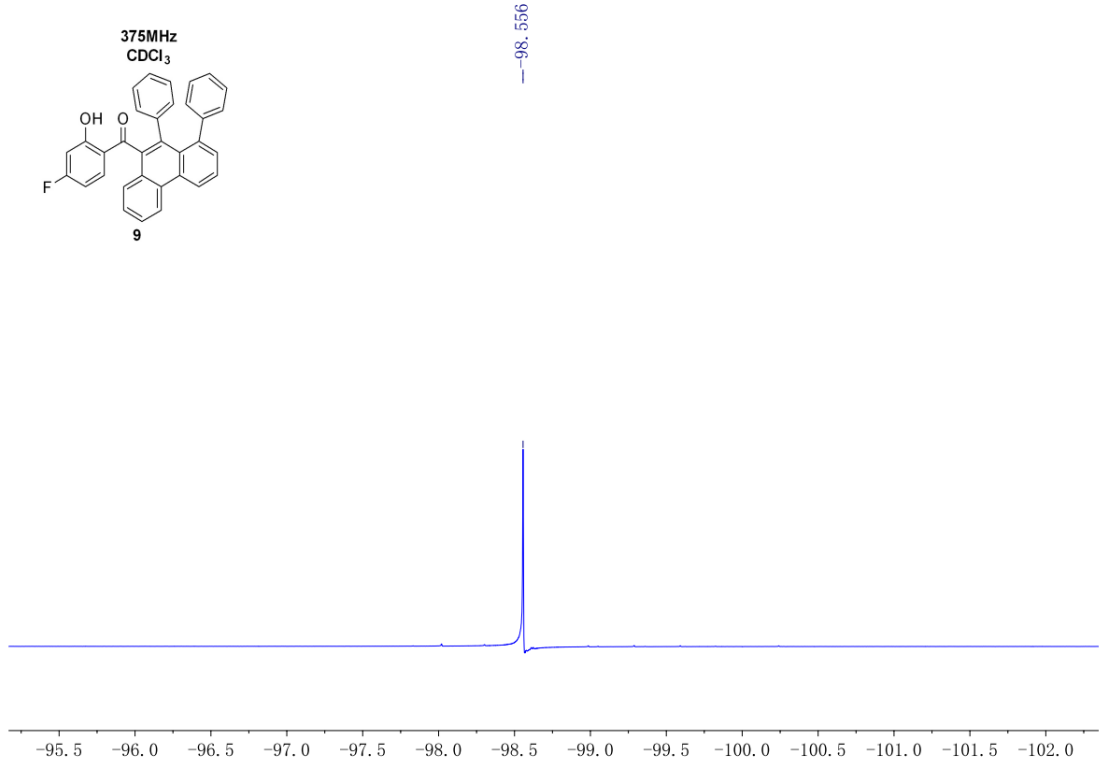

12.115  
12.093

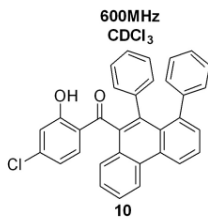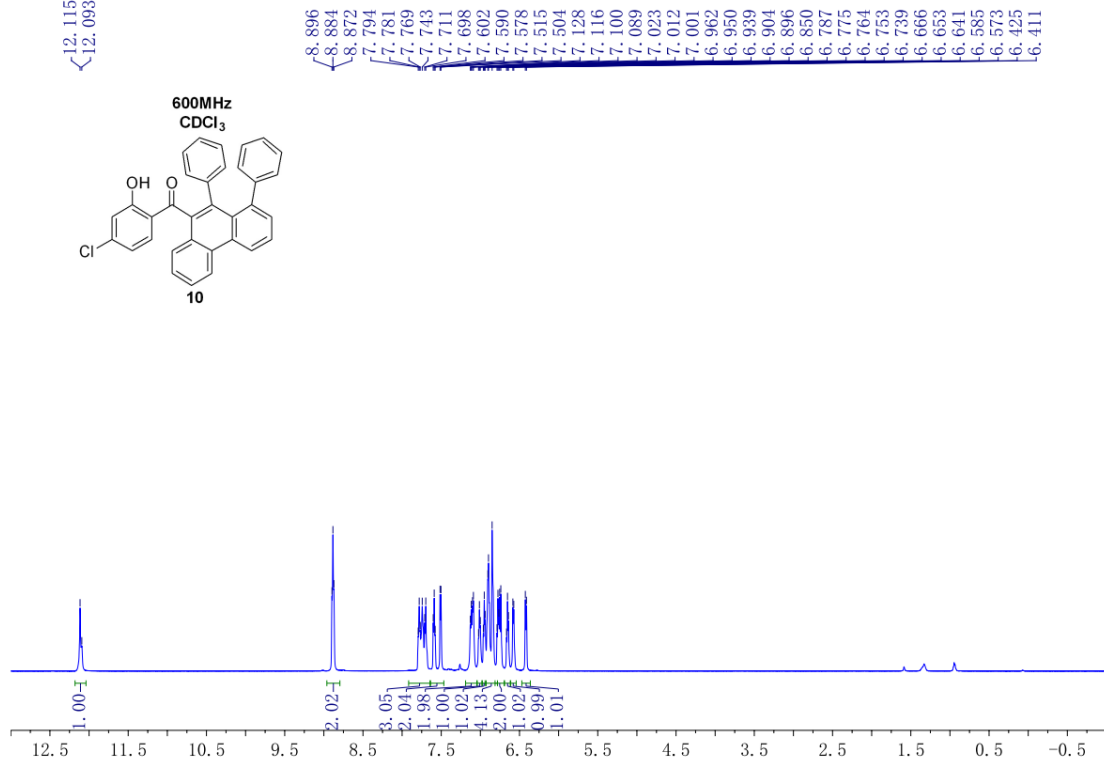



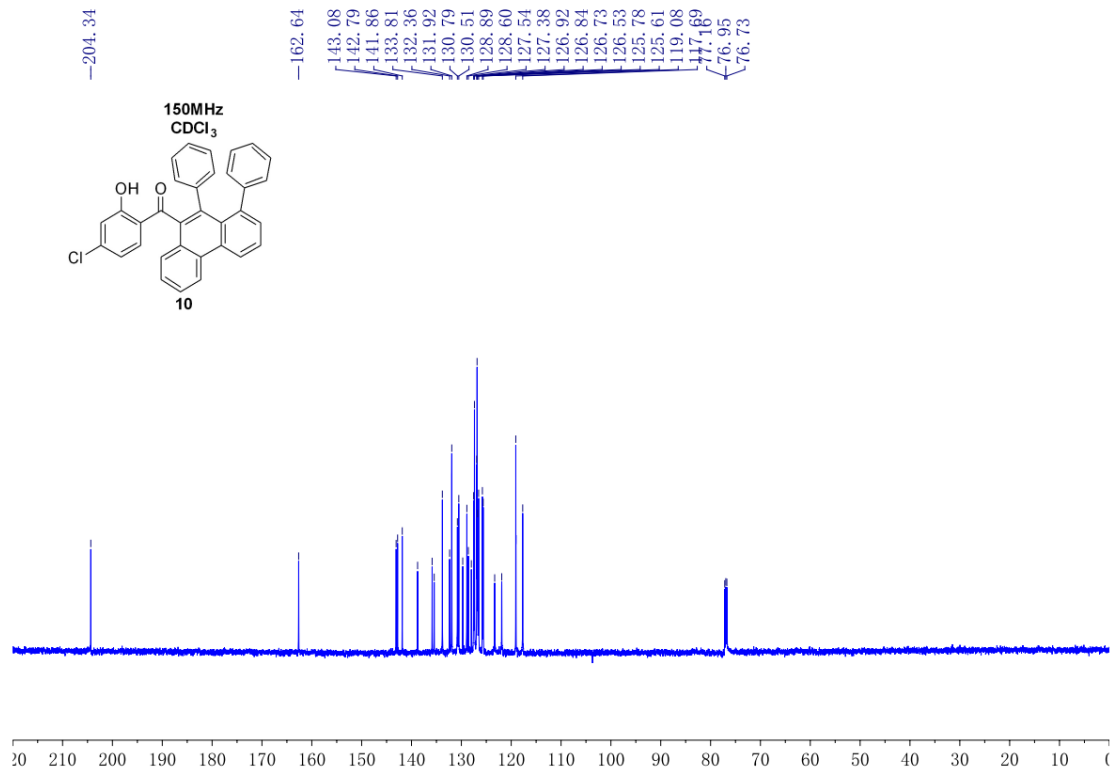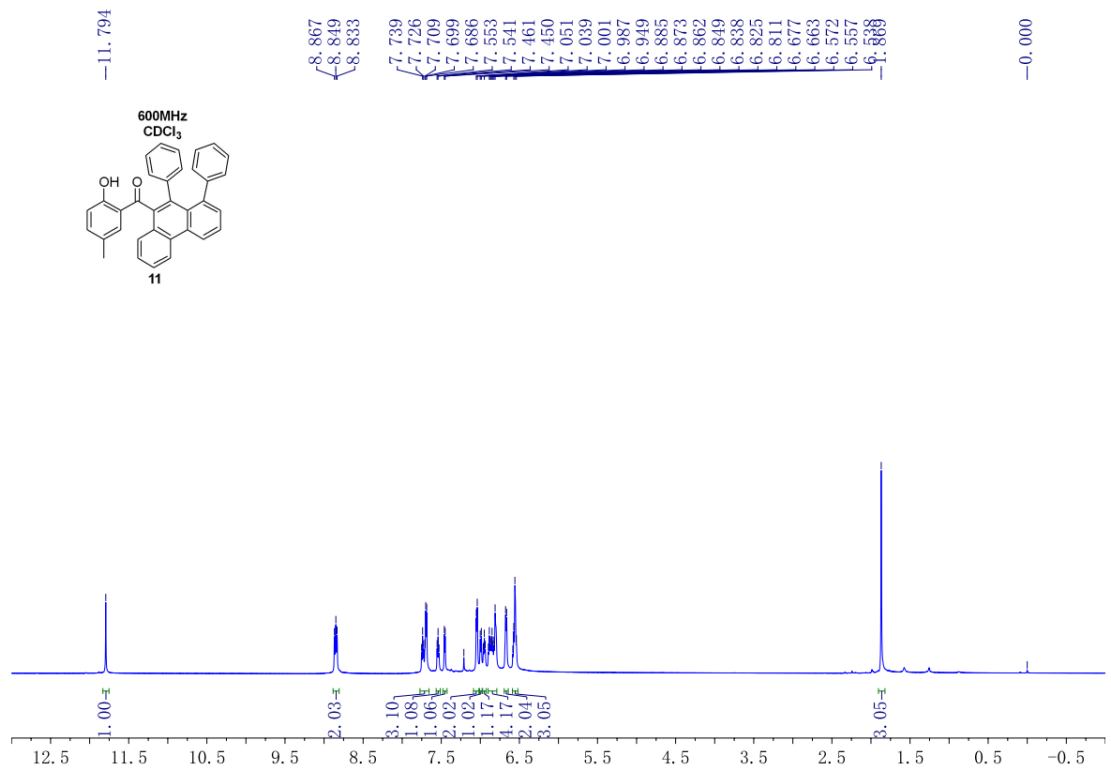

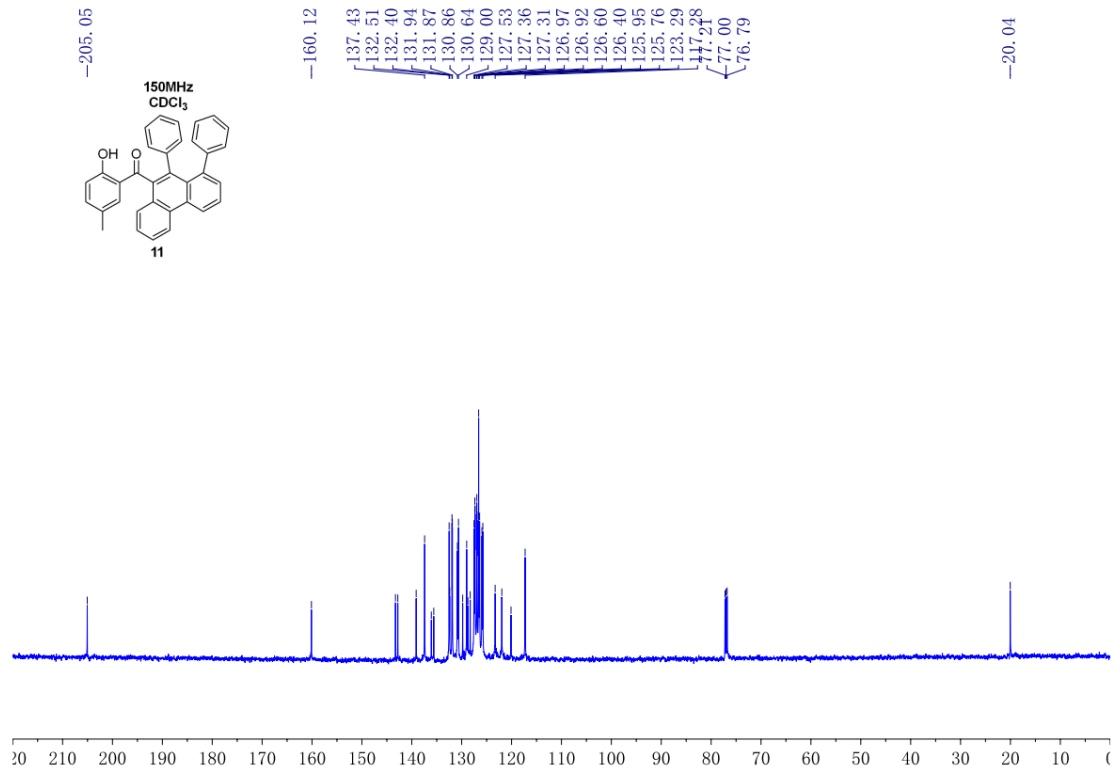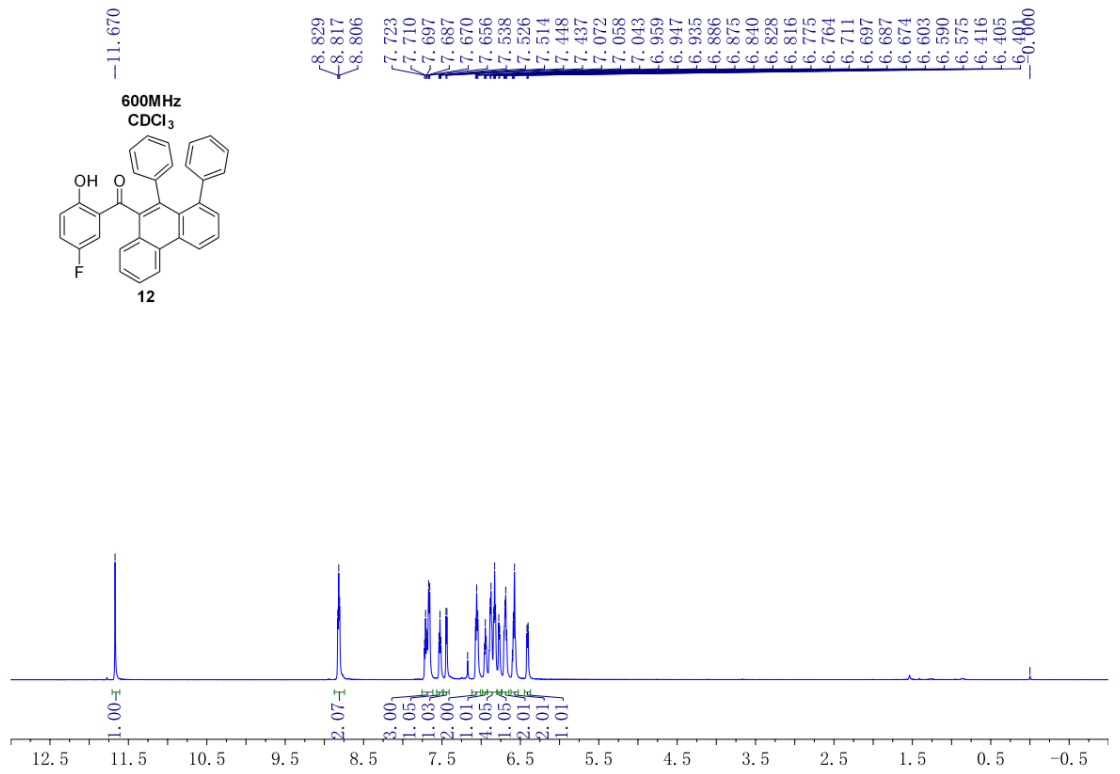

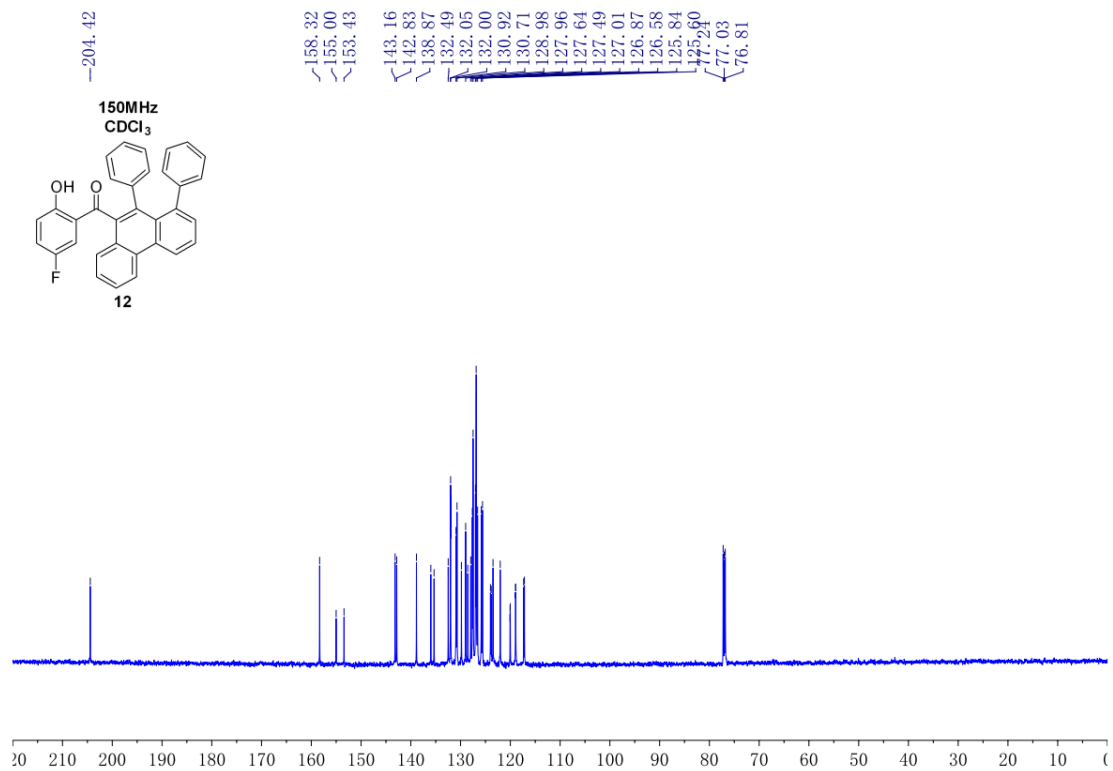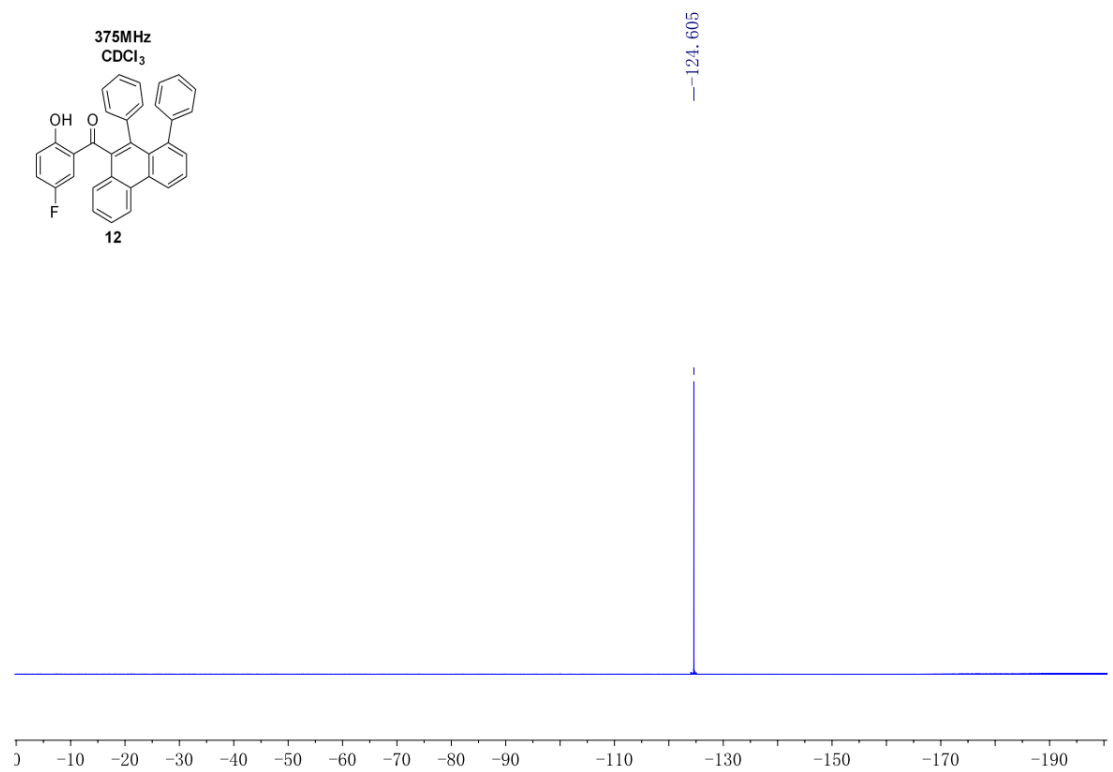

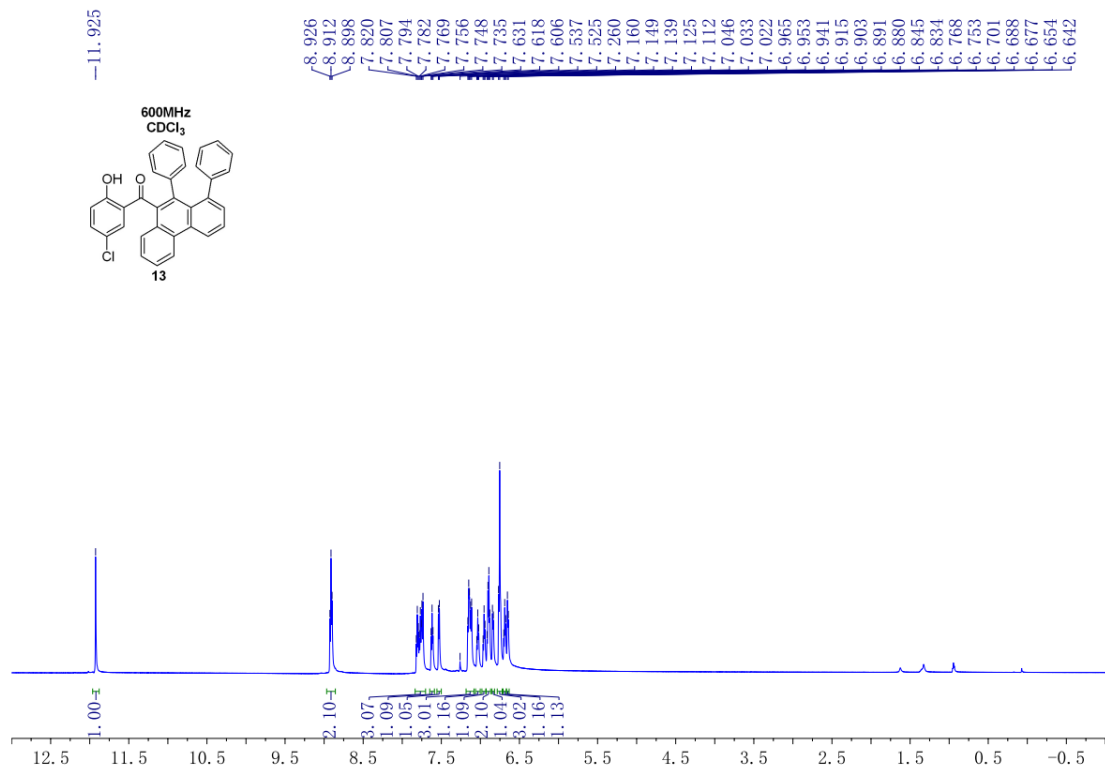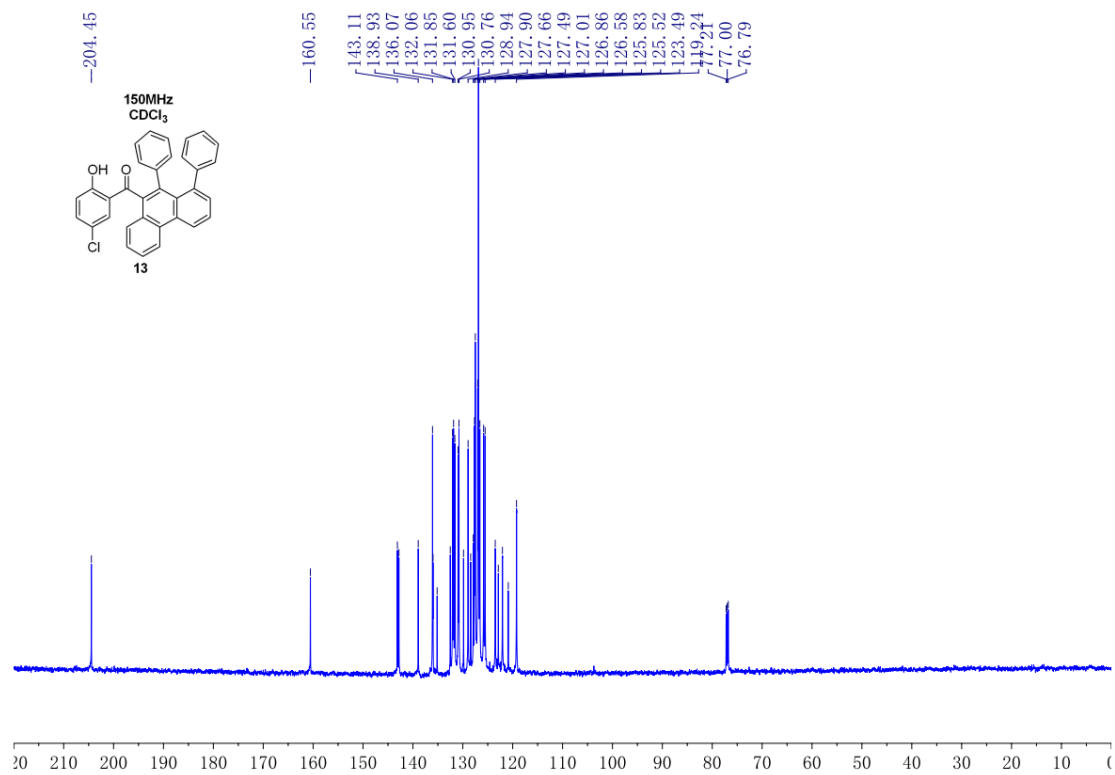

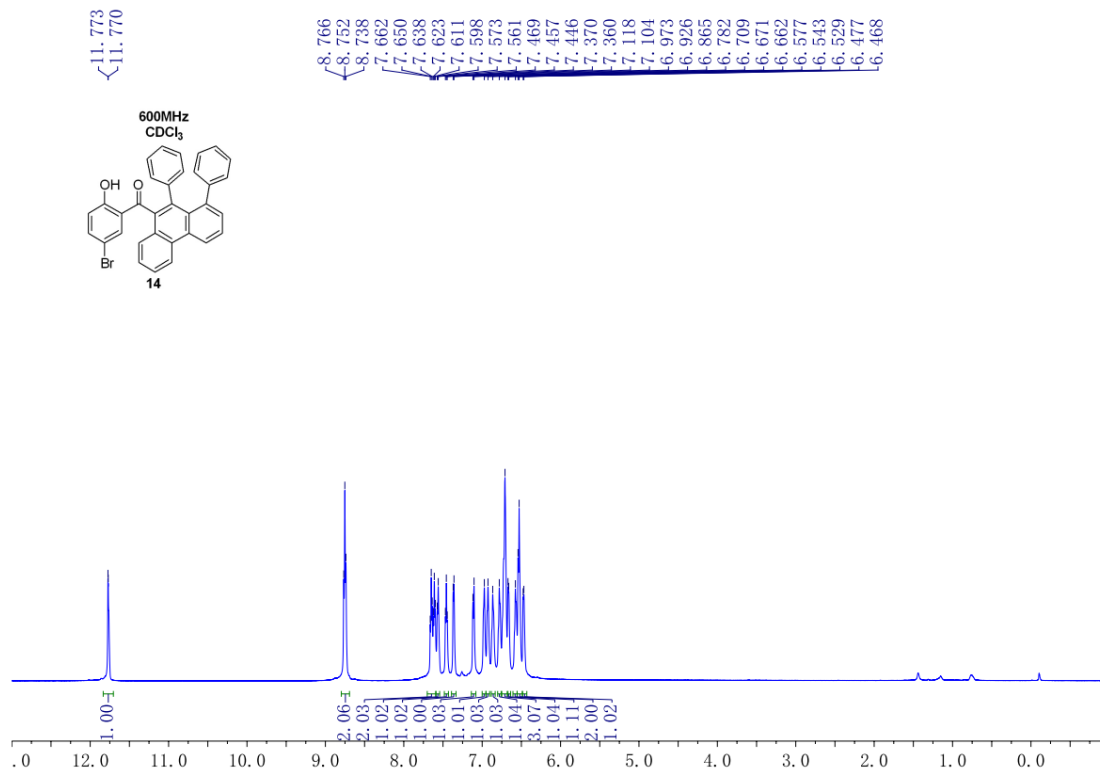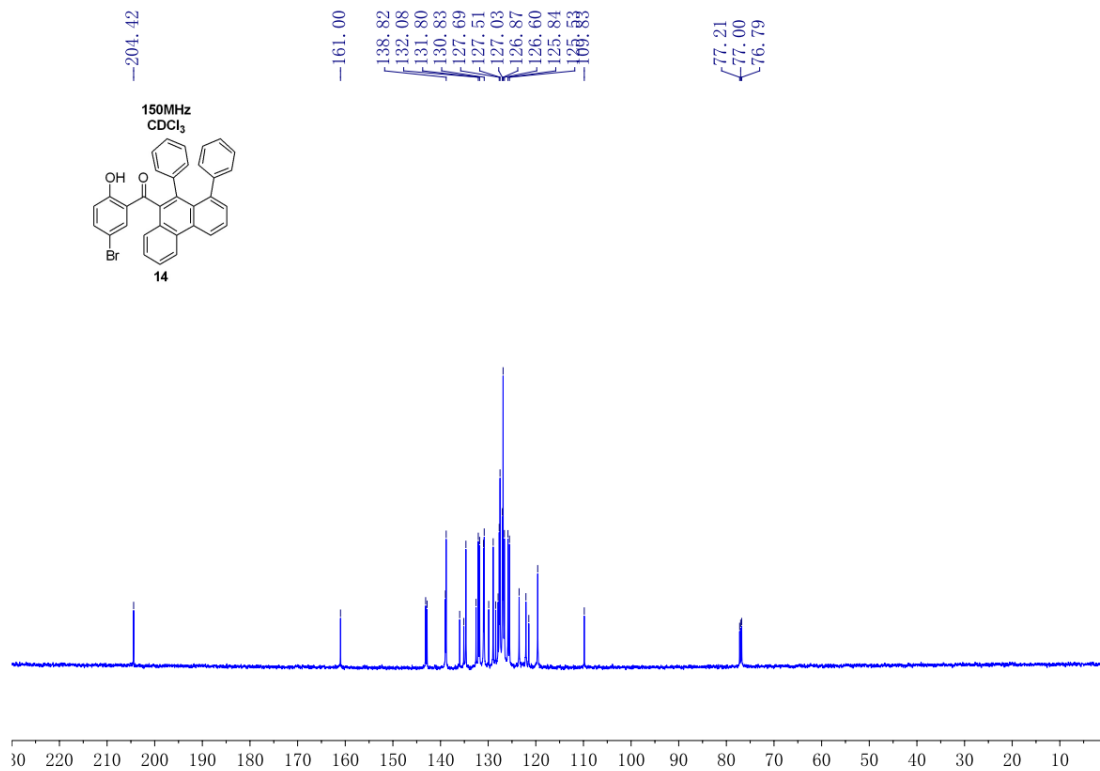

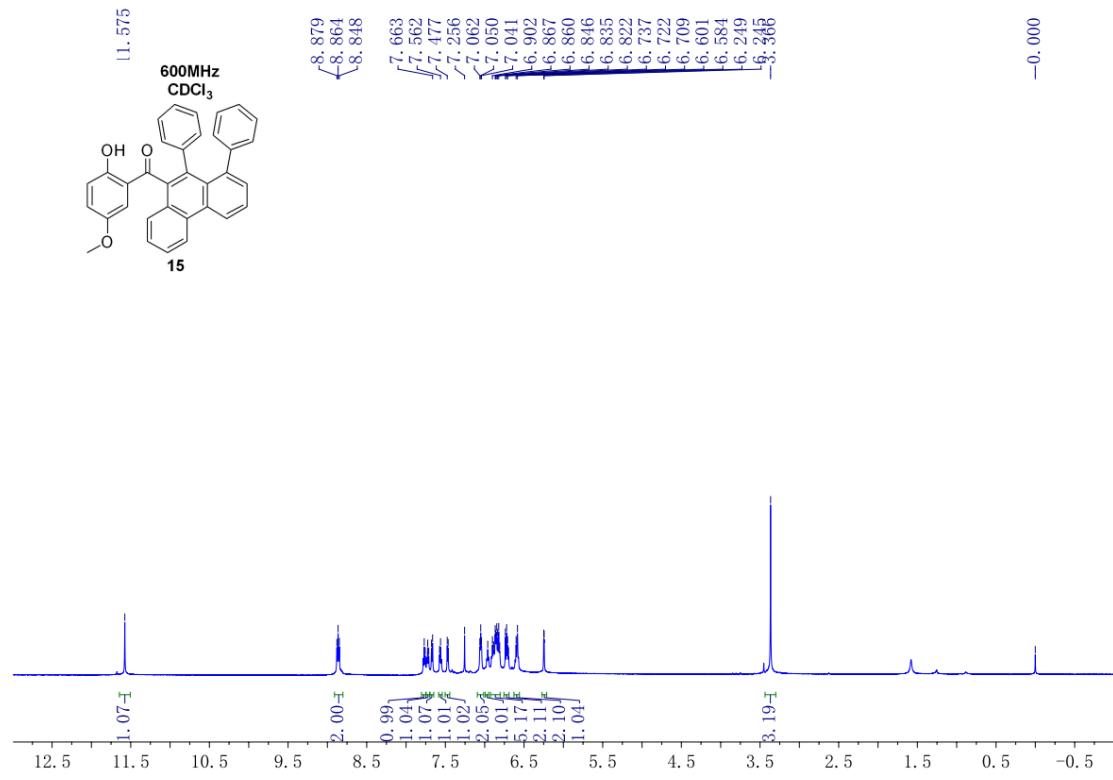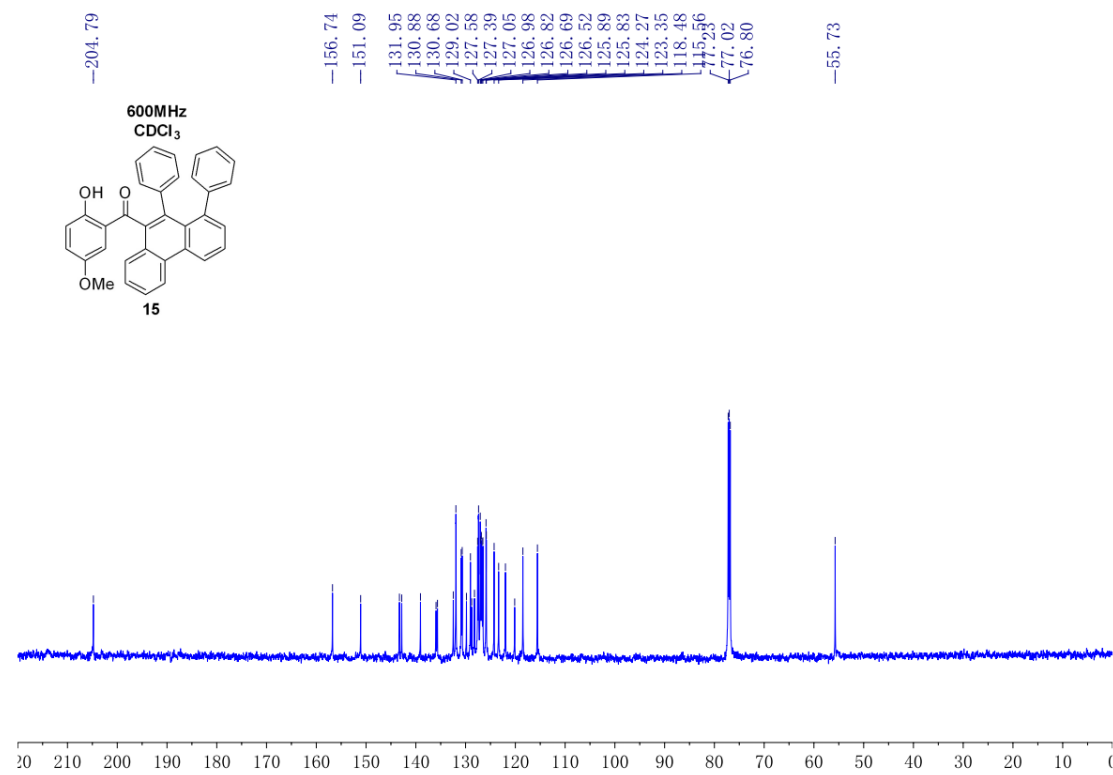

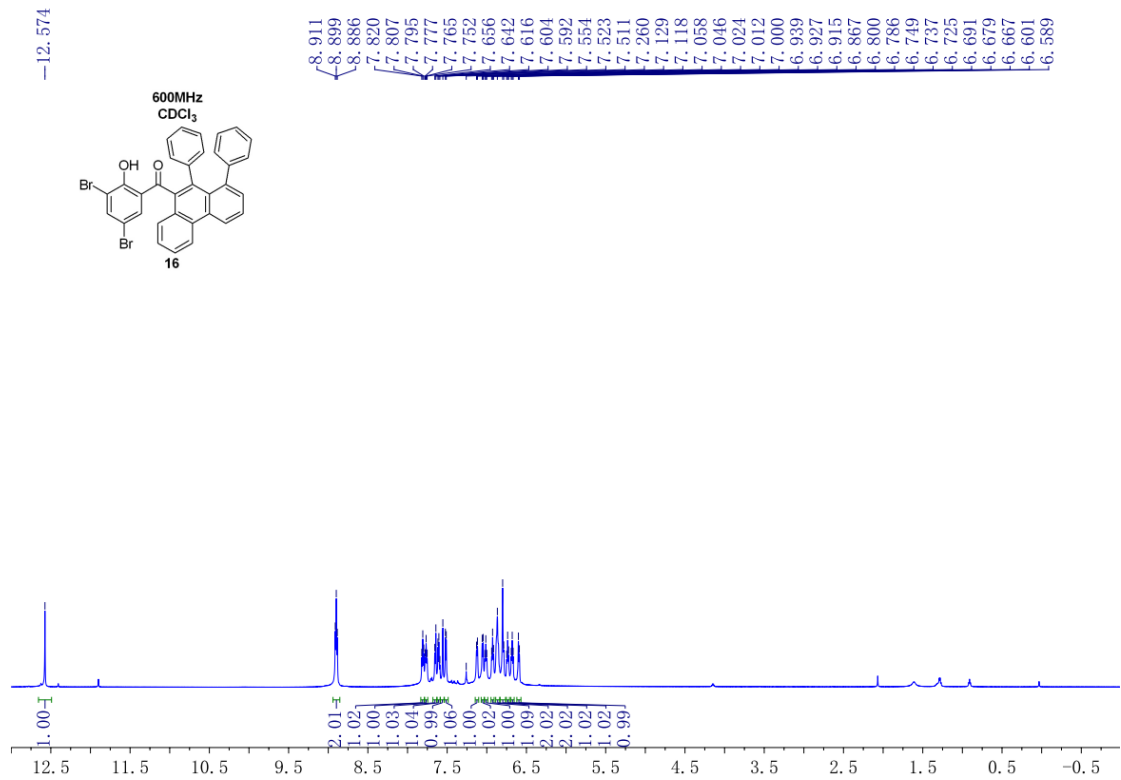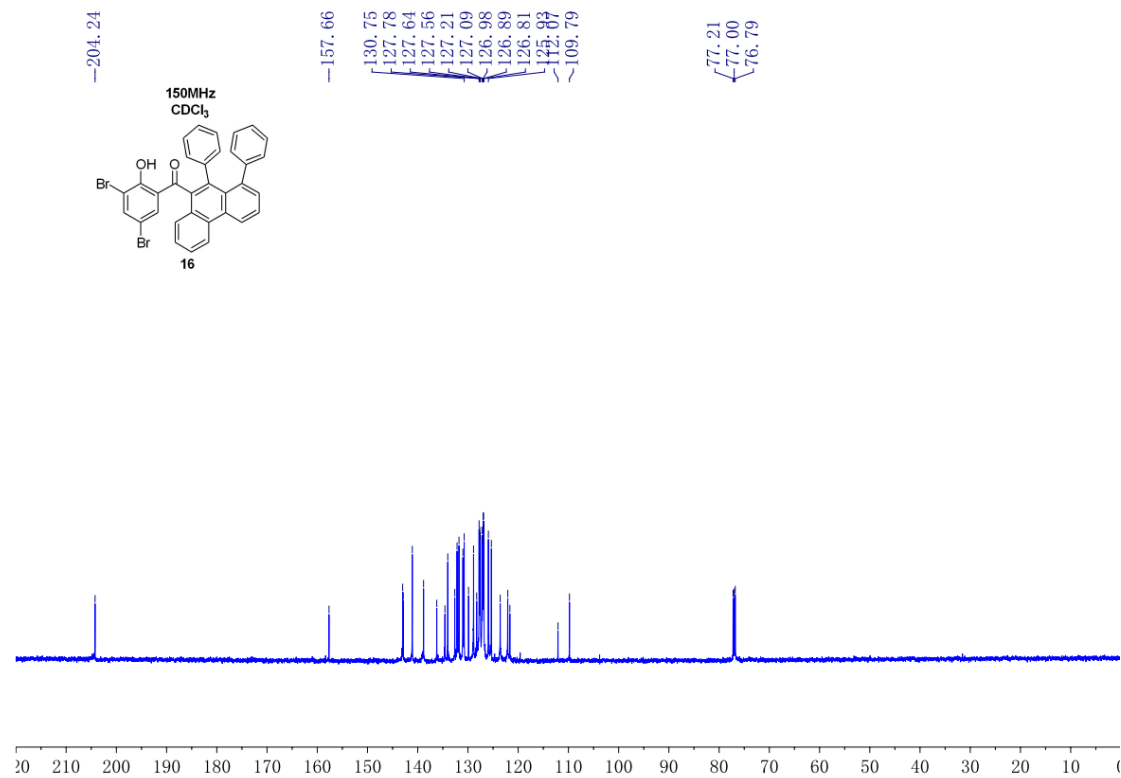

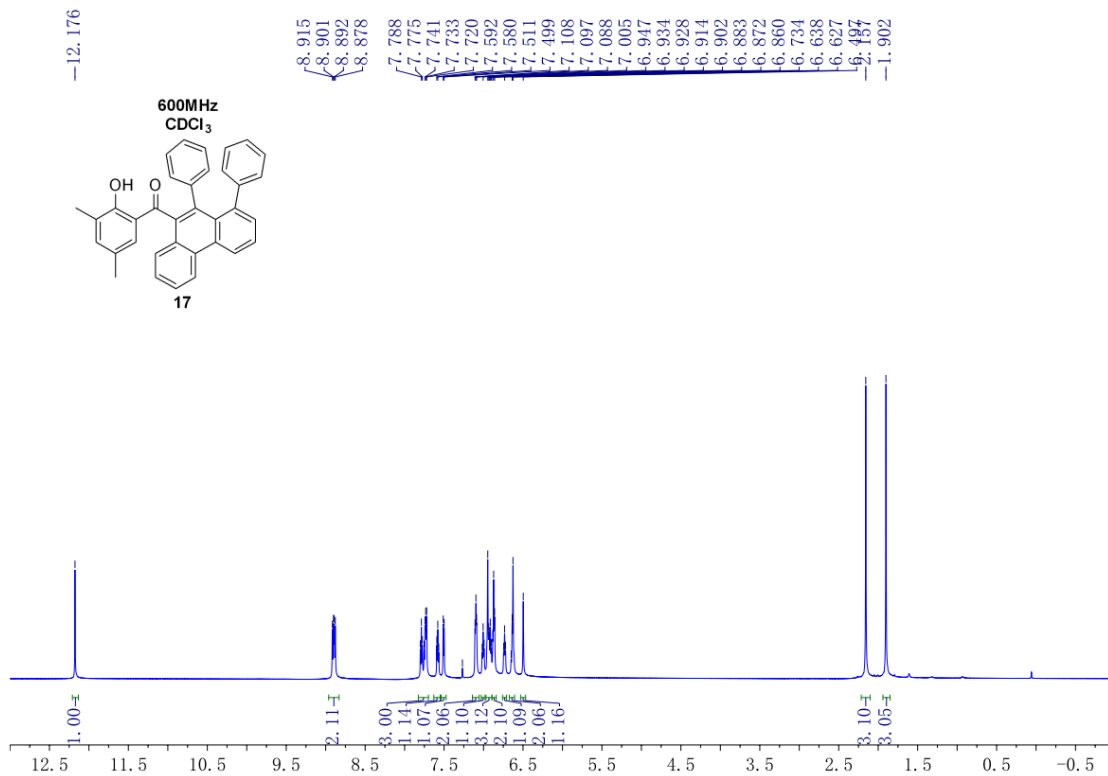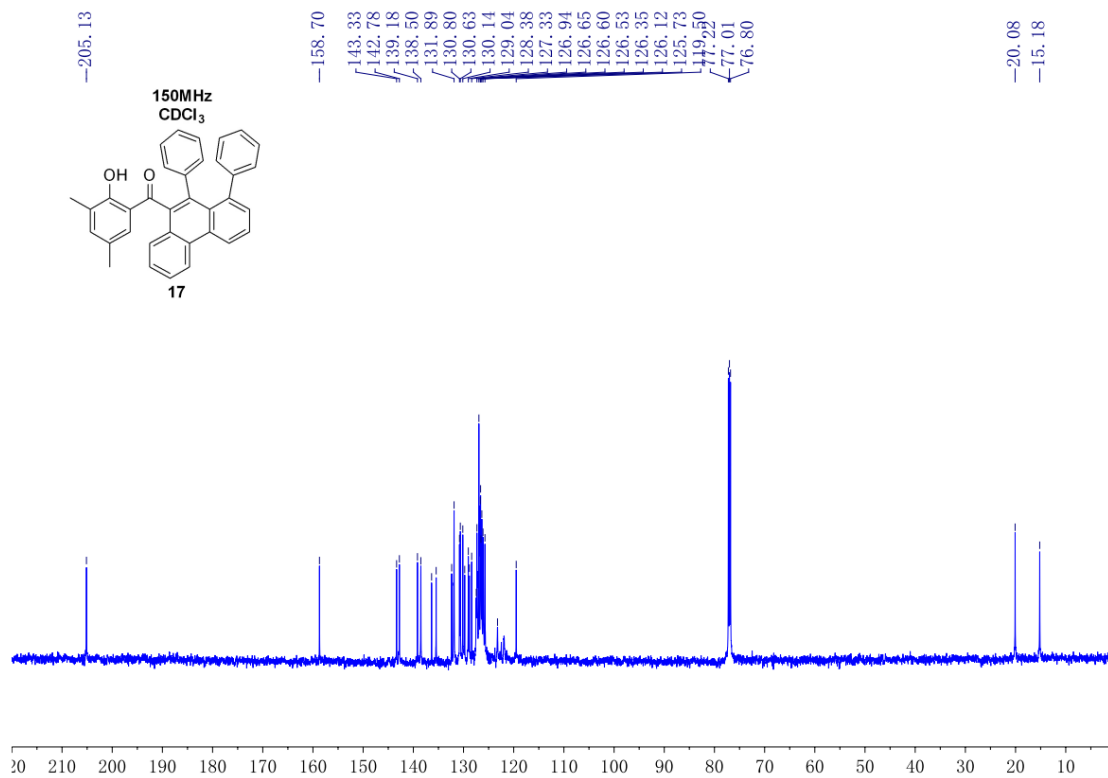



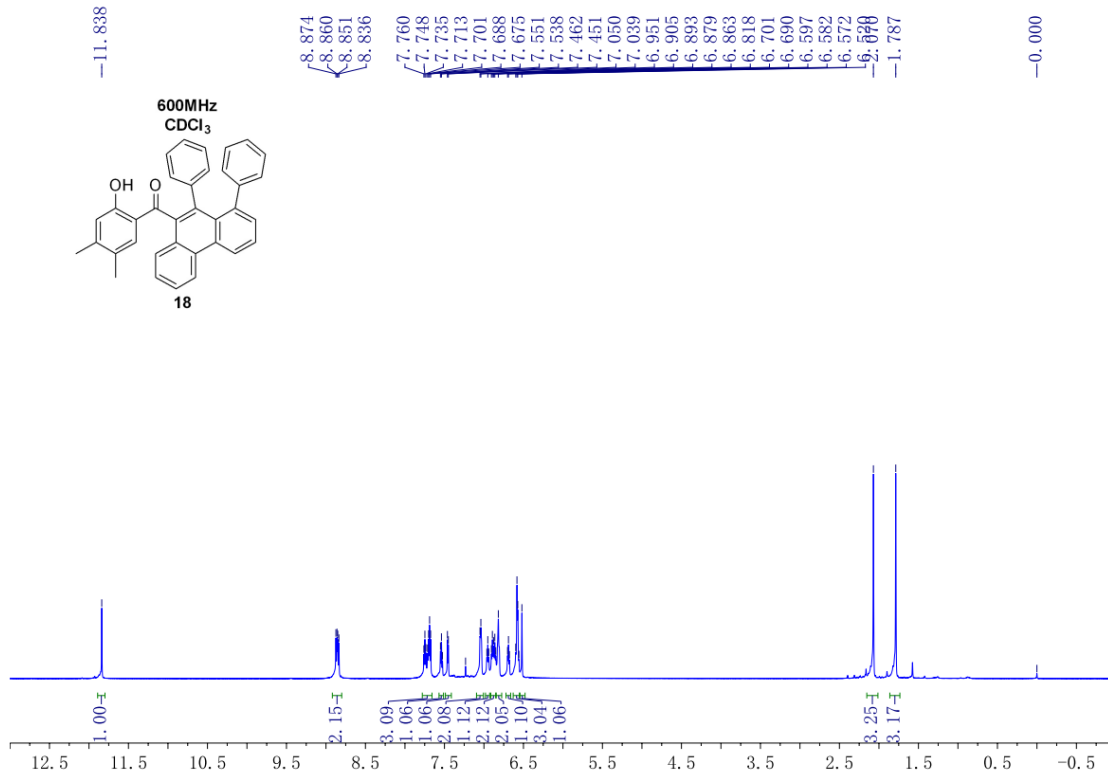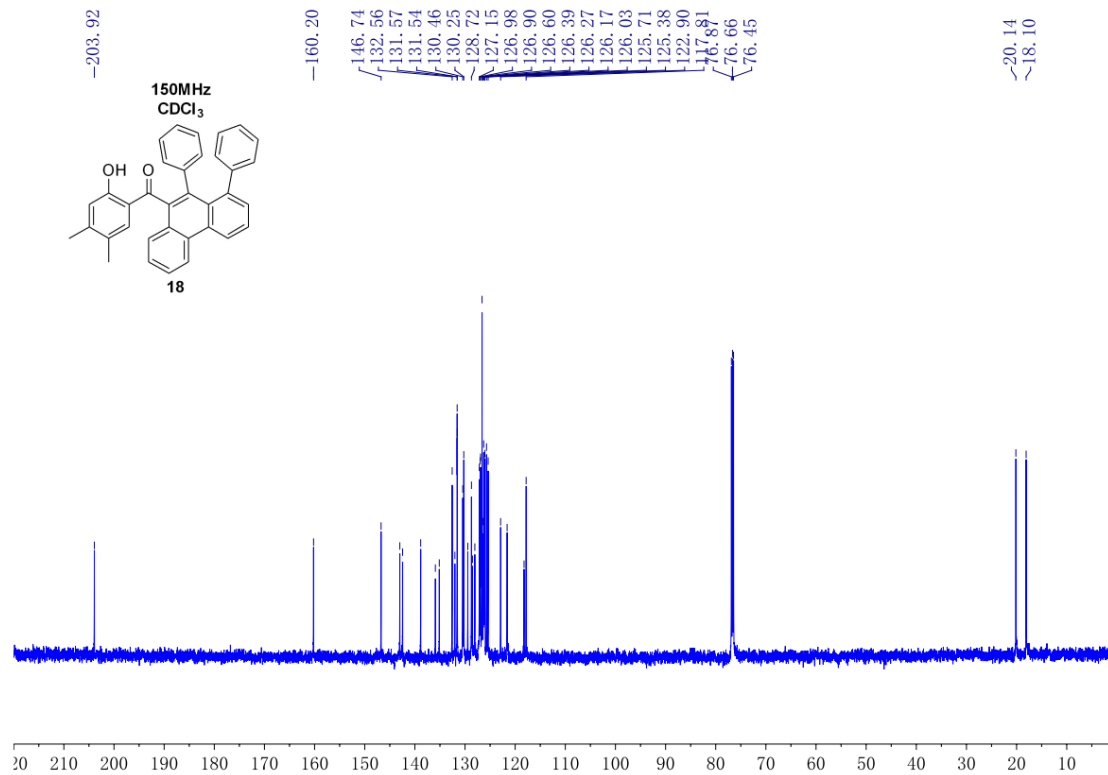

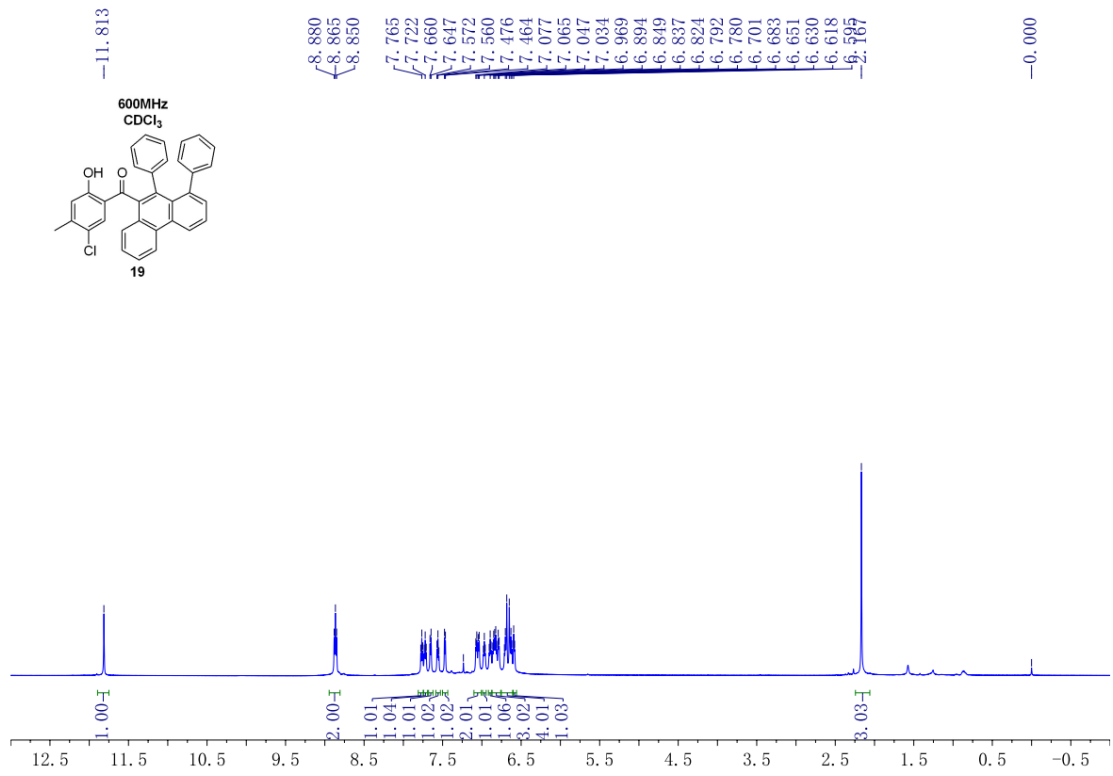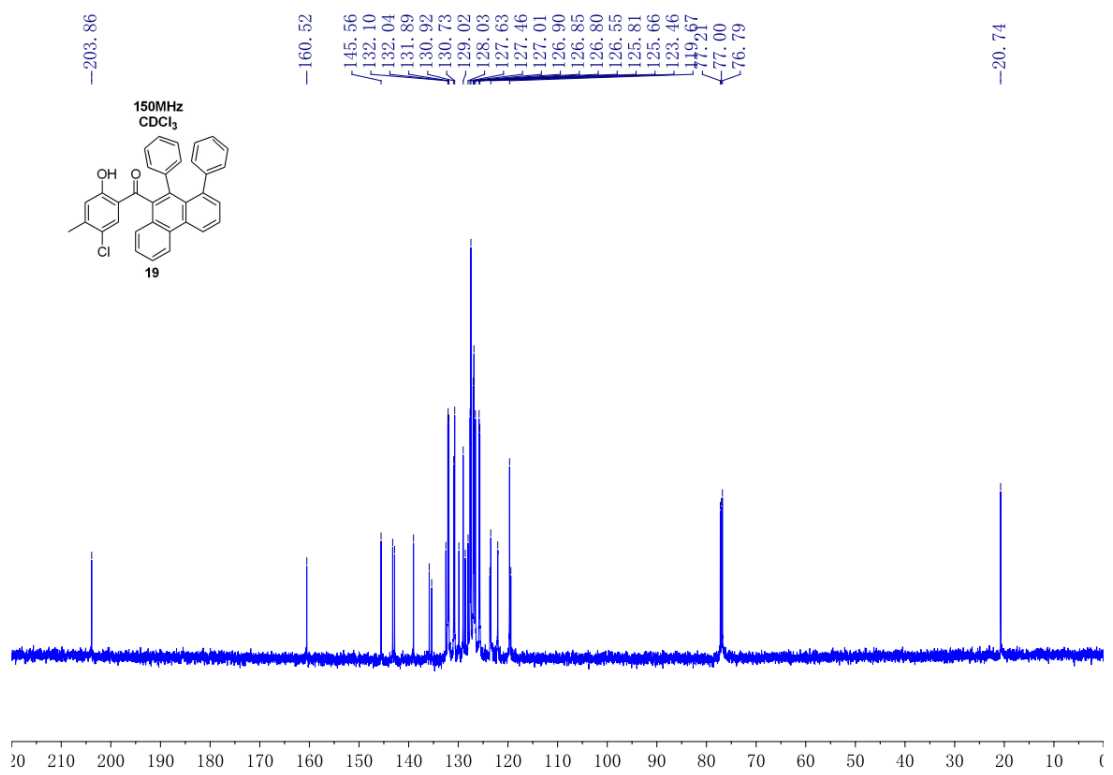

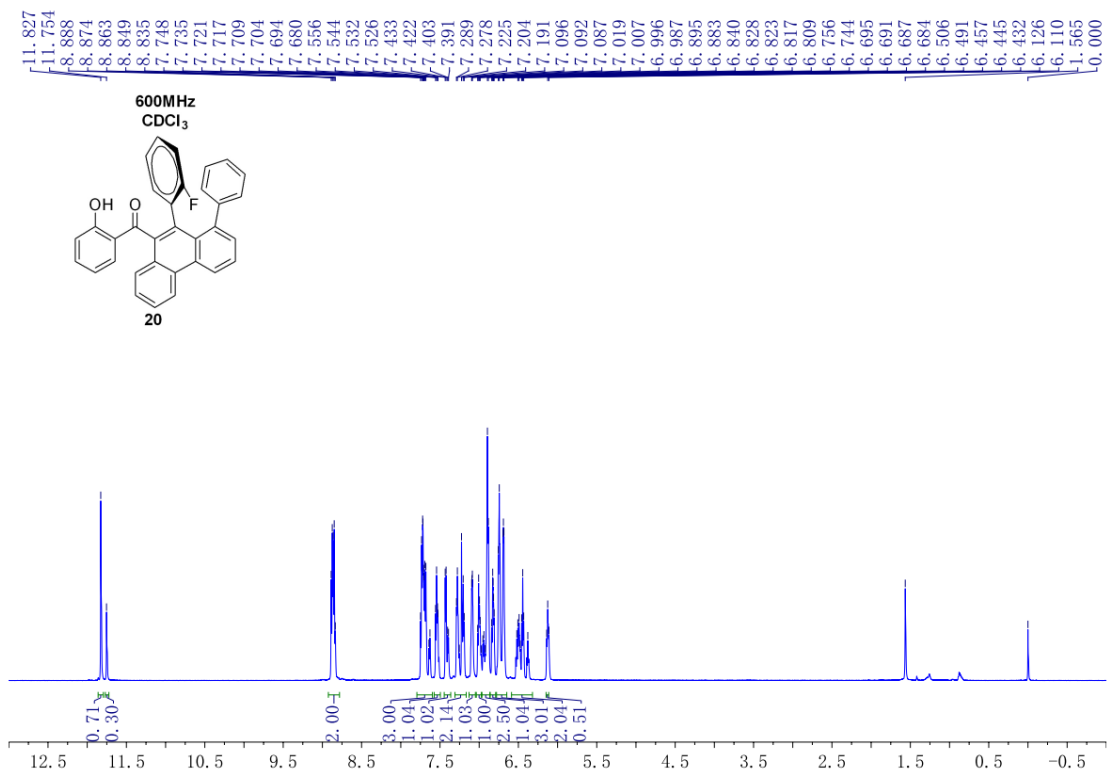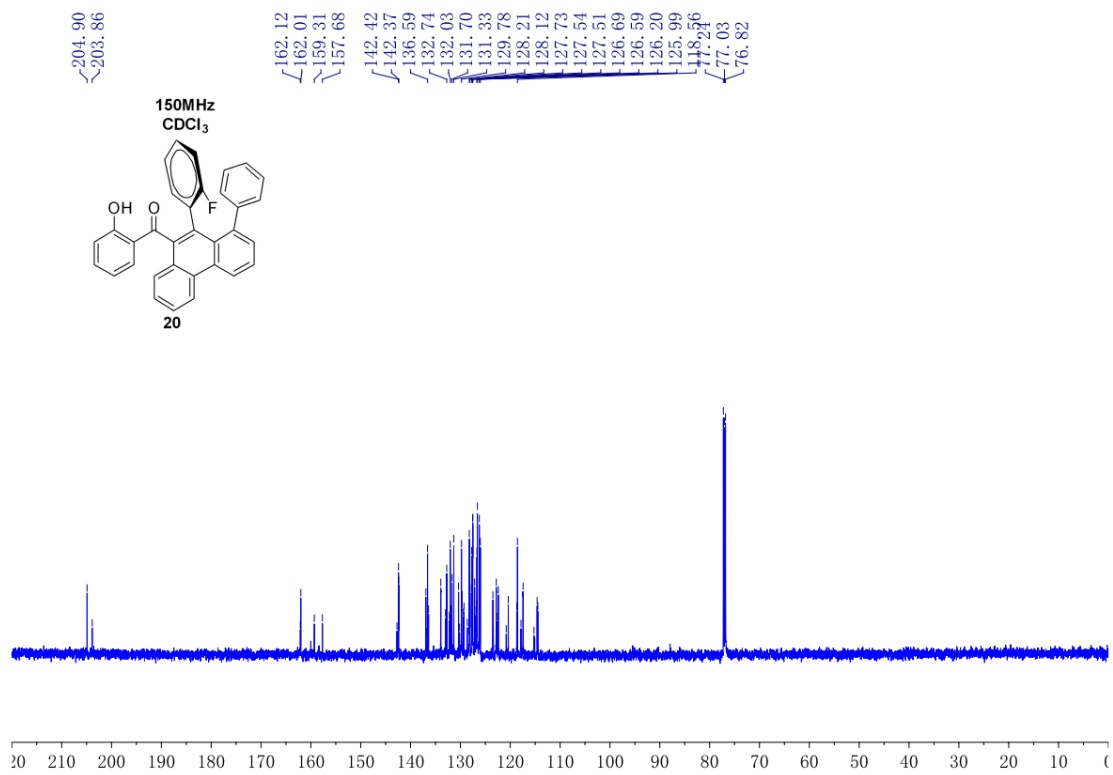

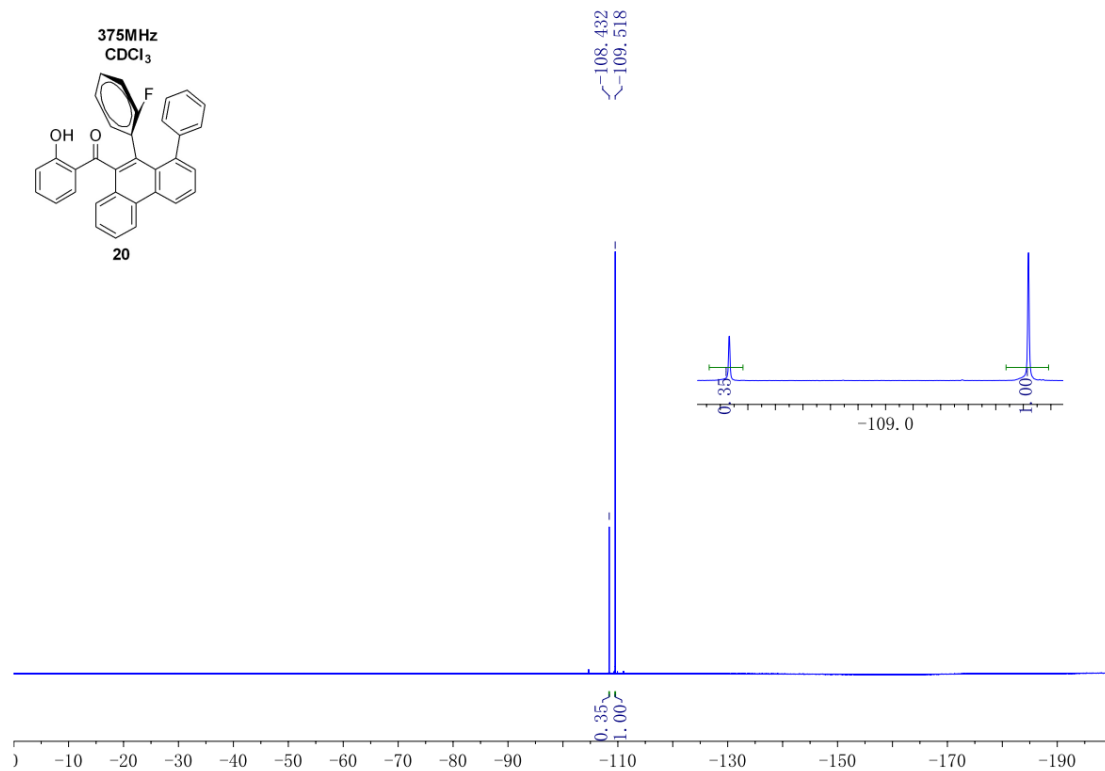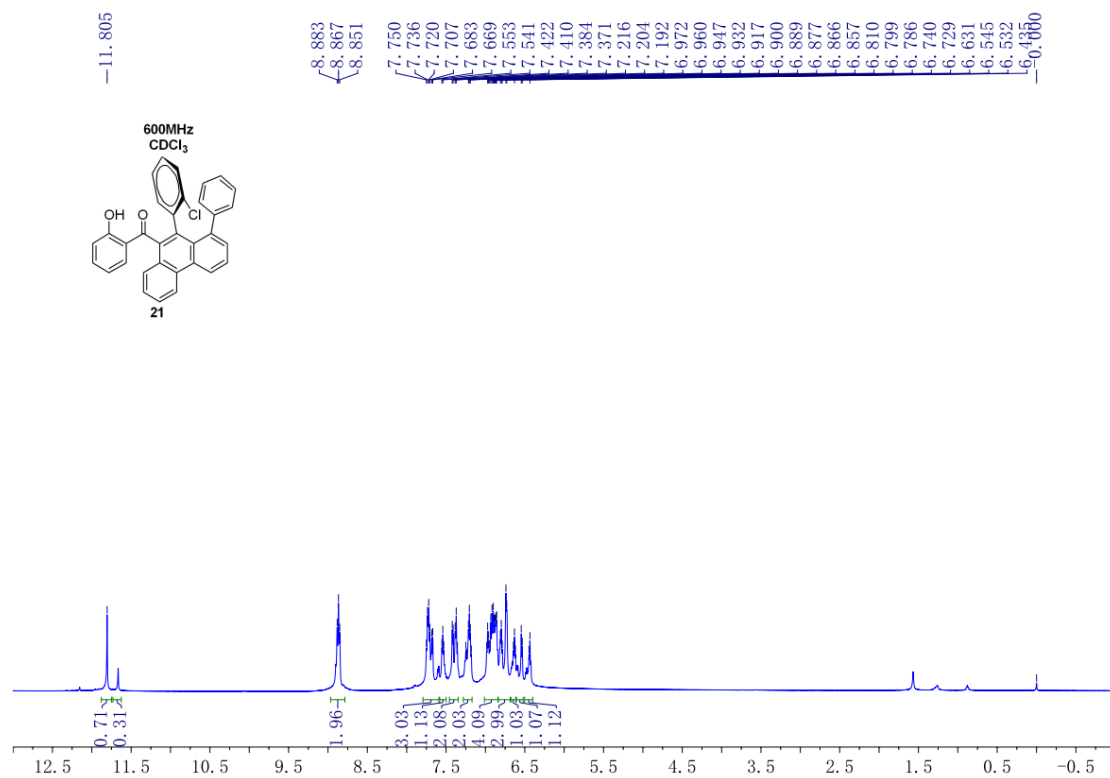

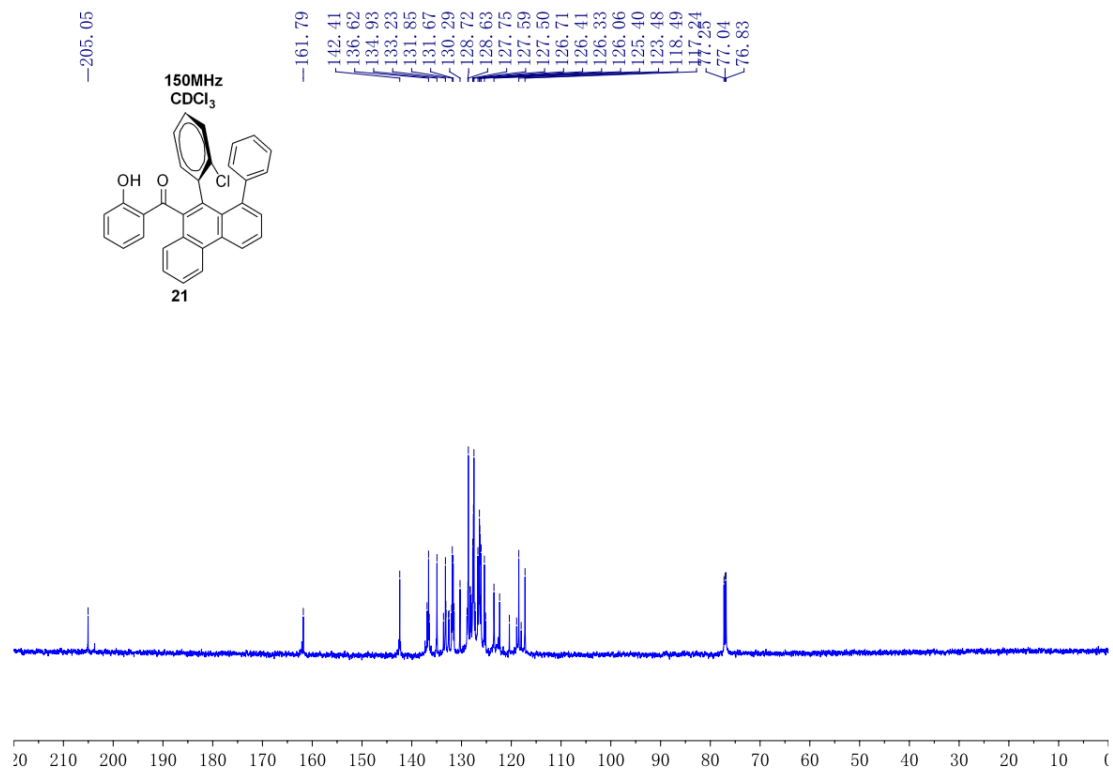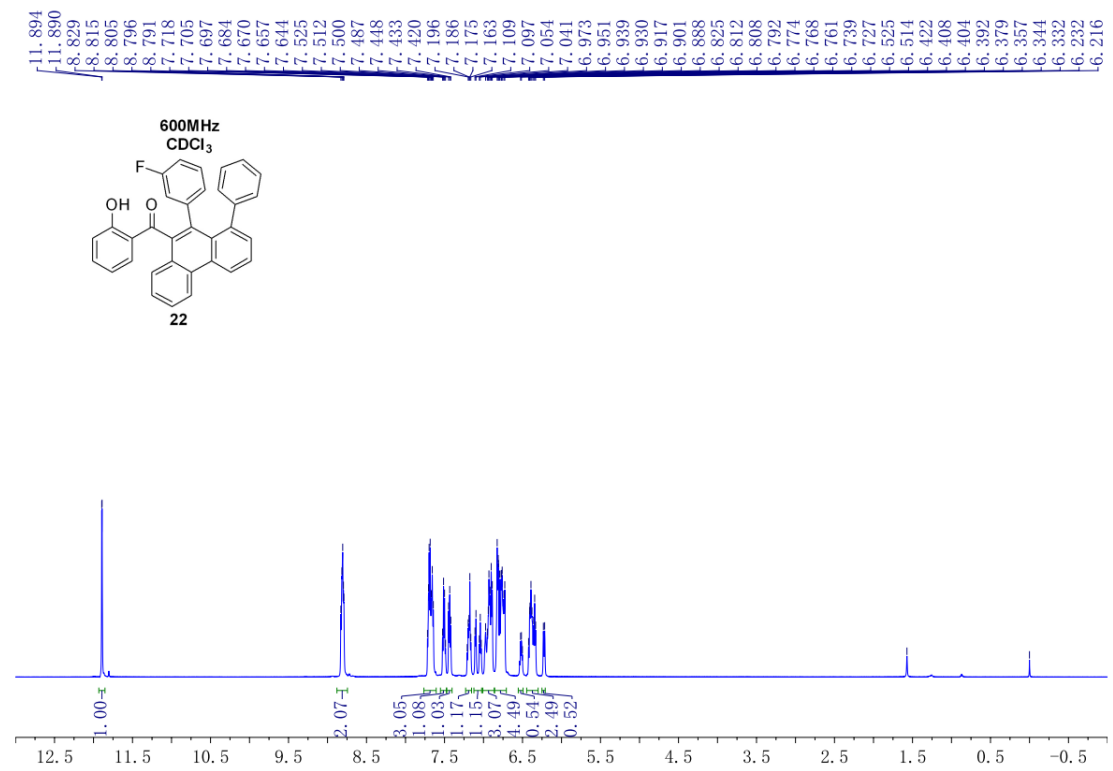

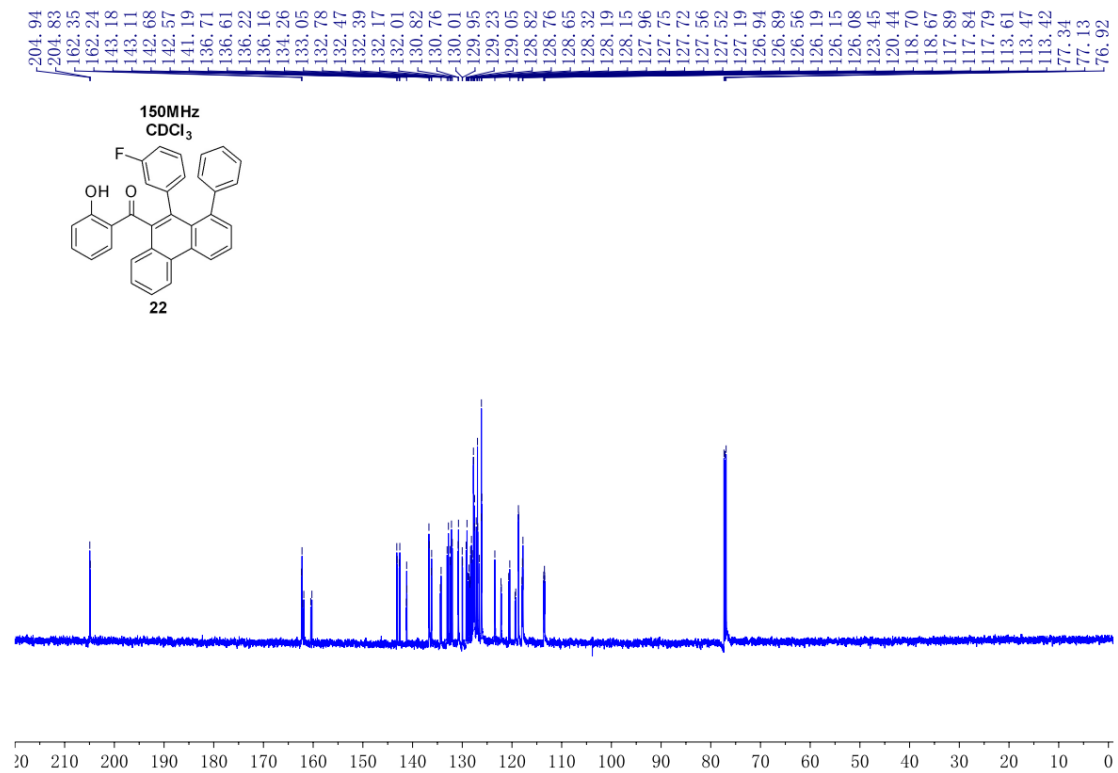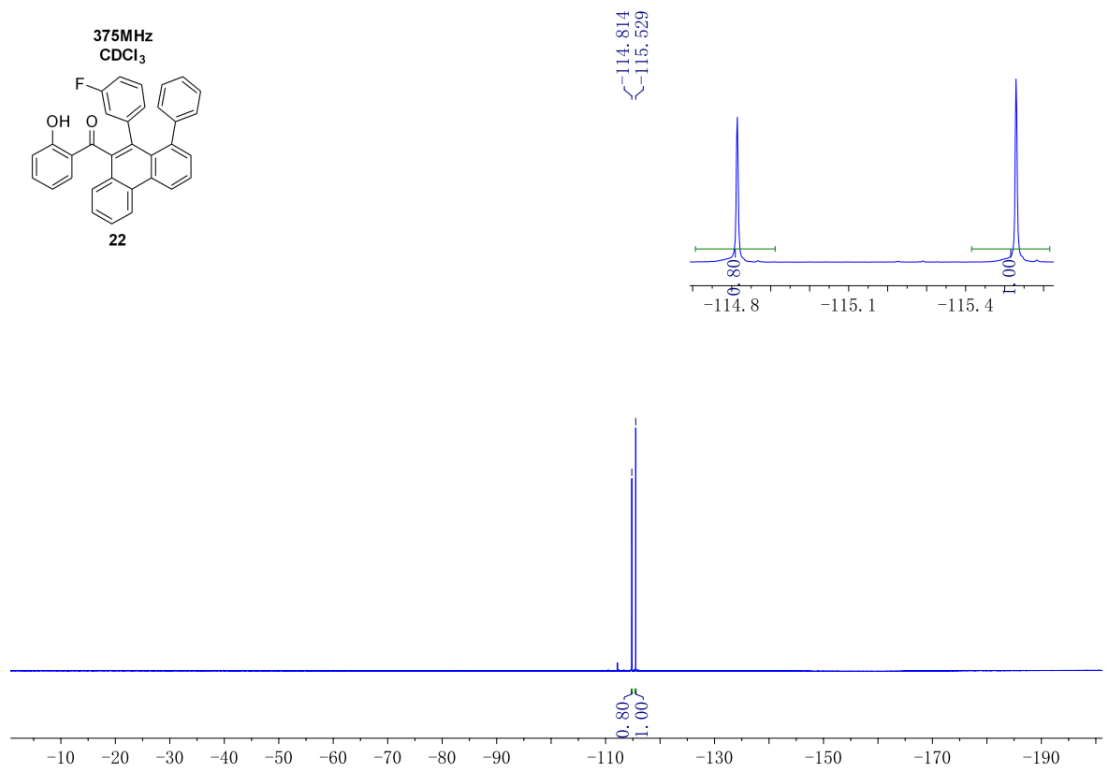

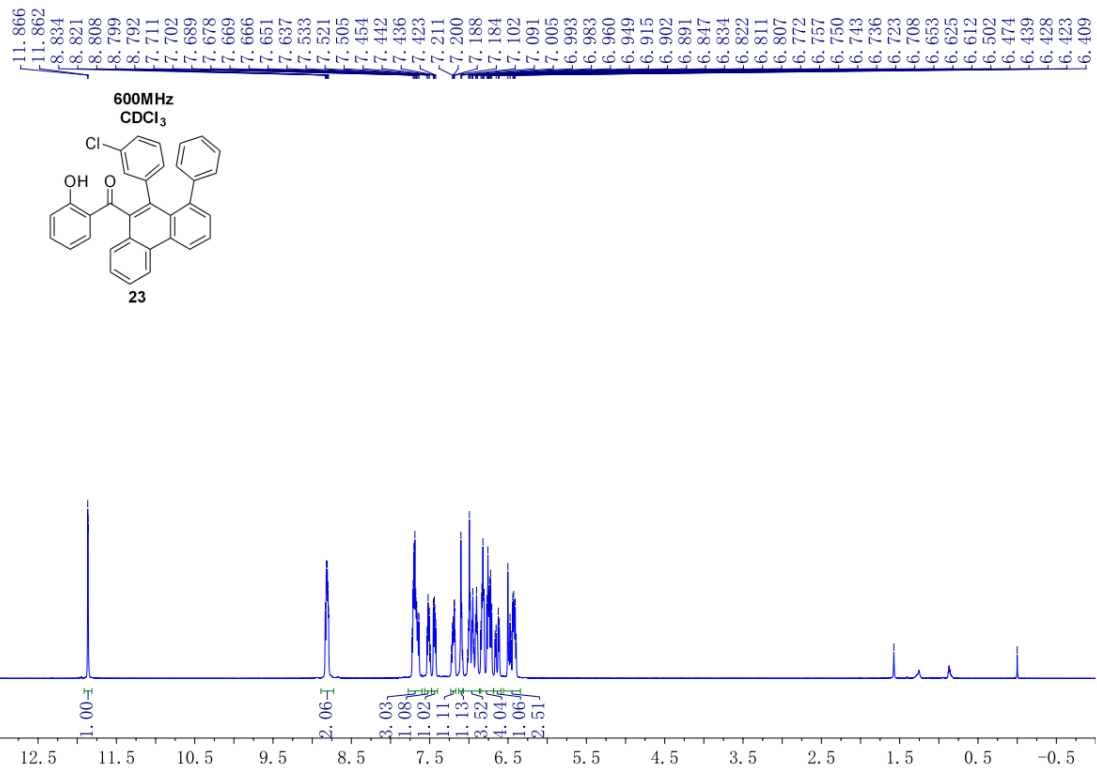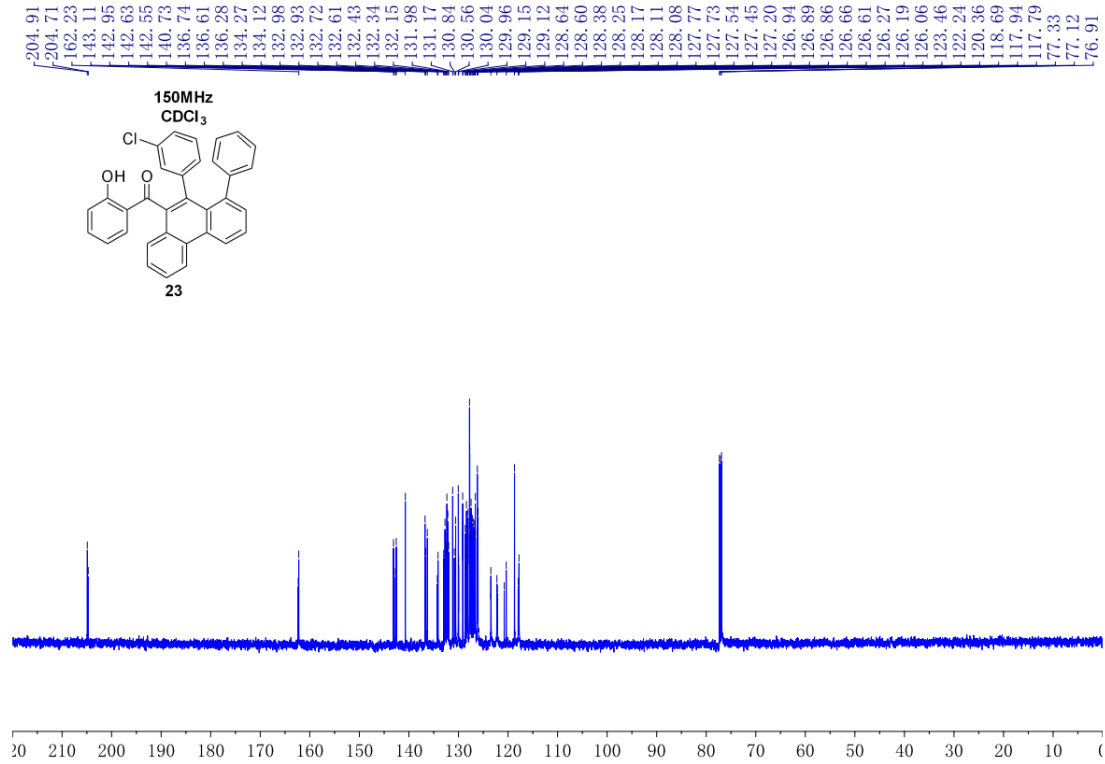

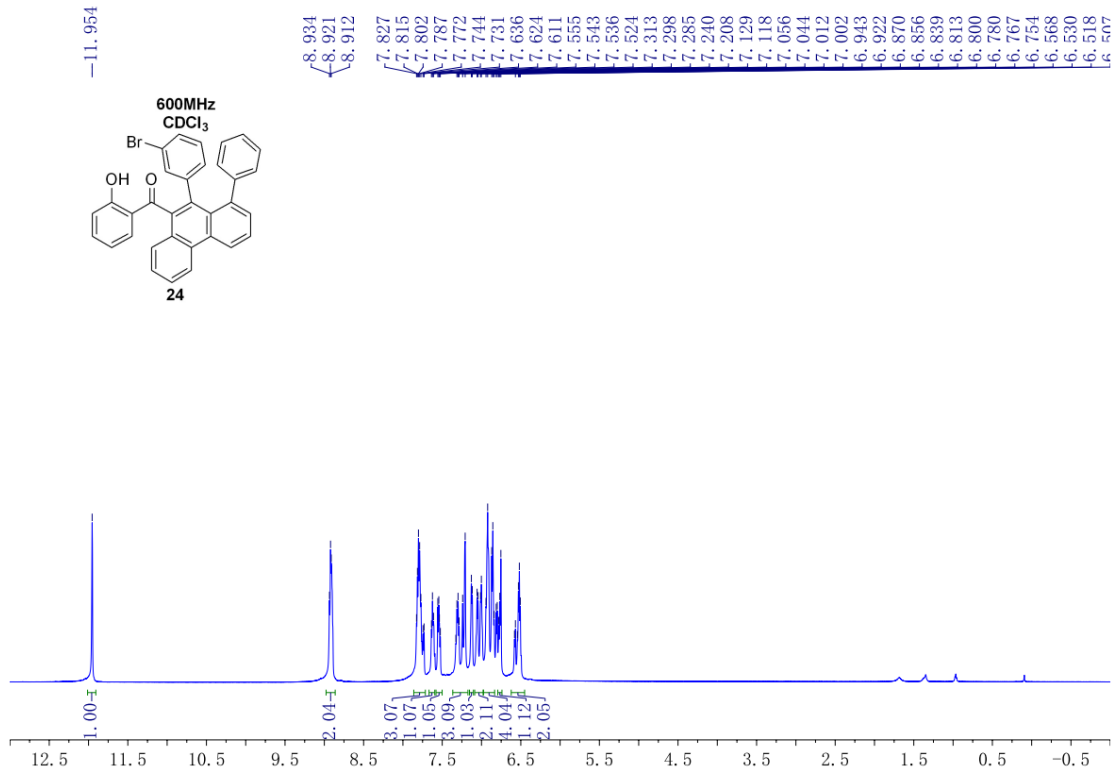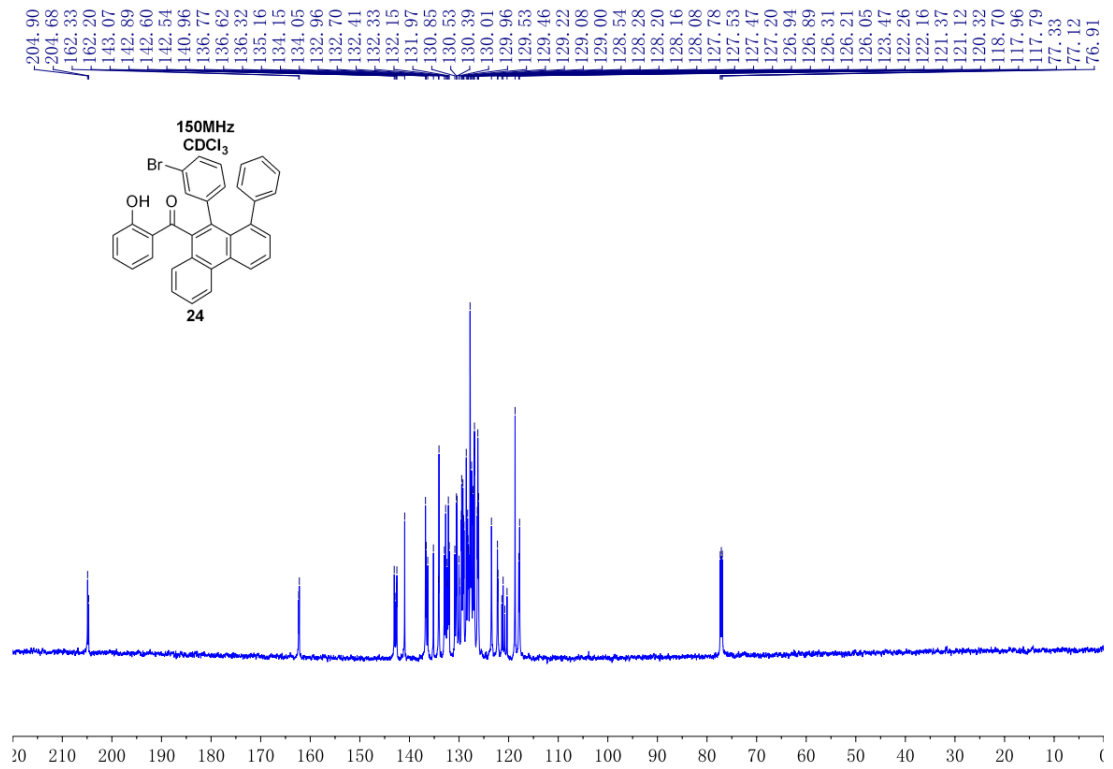



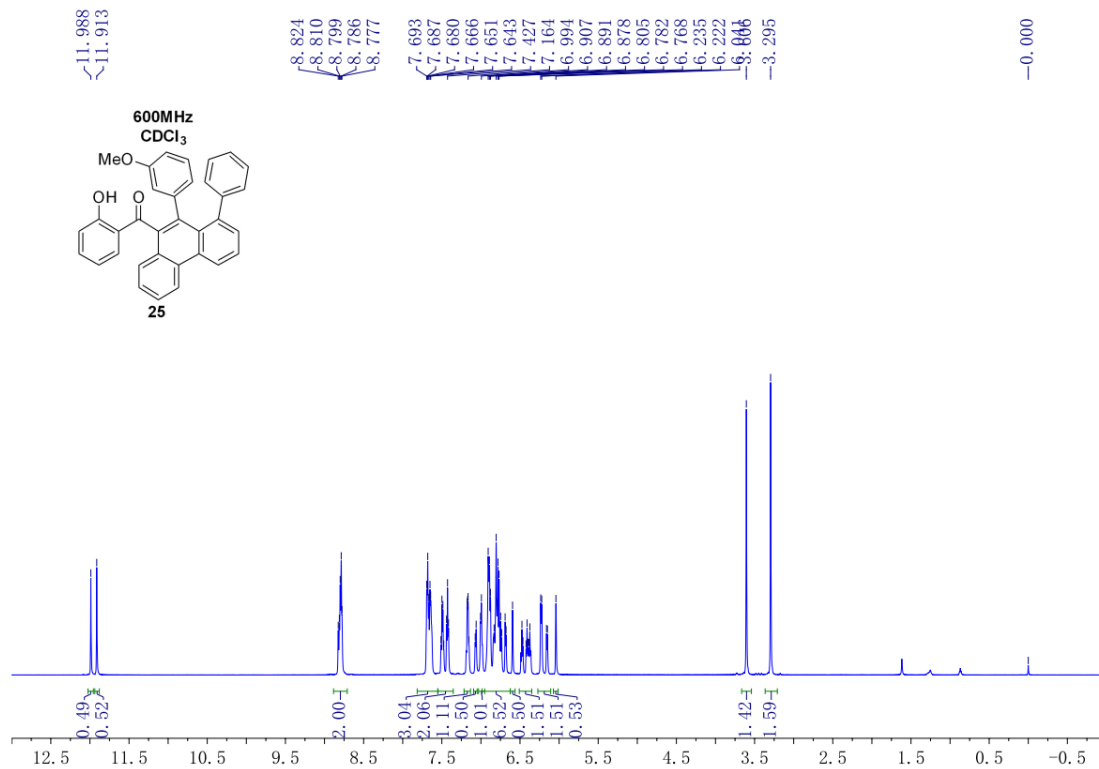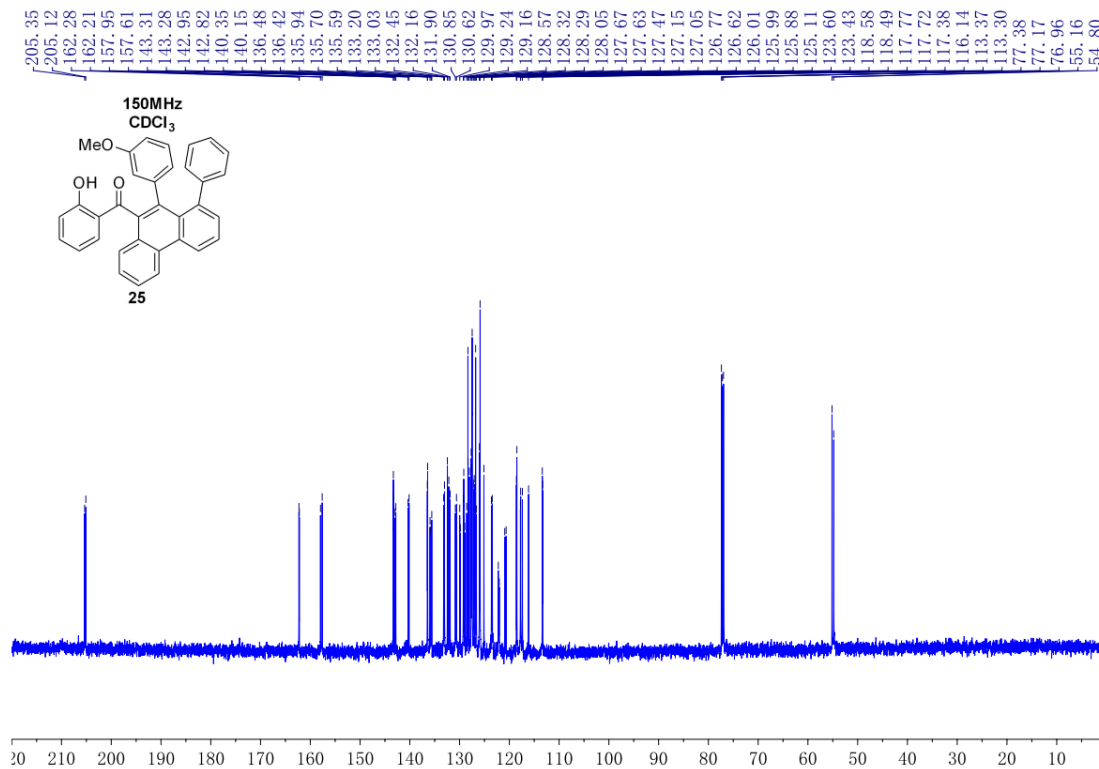

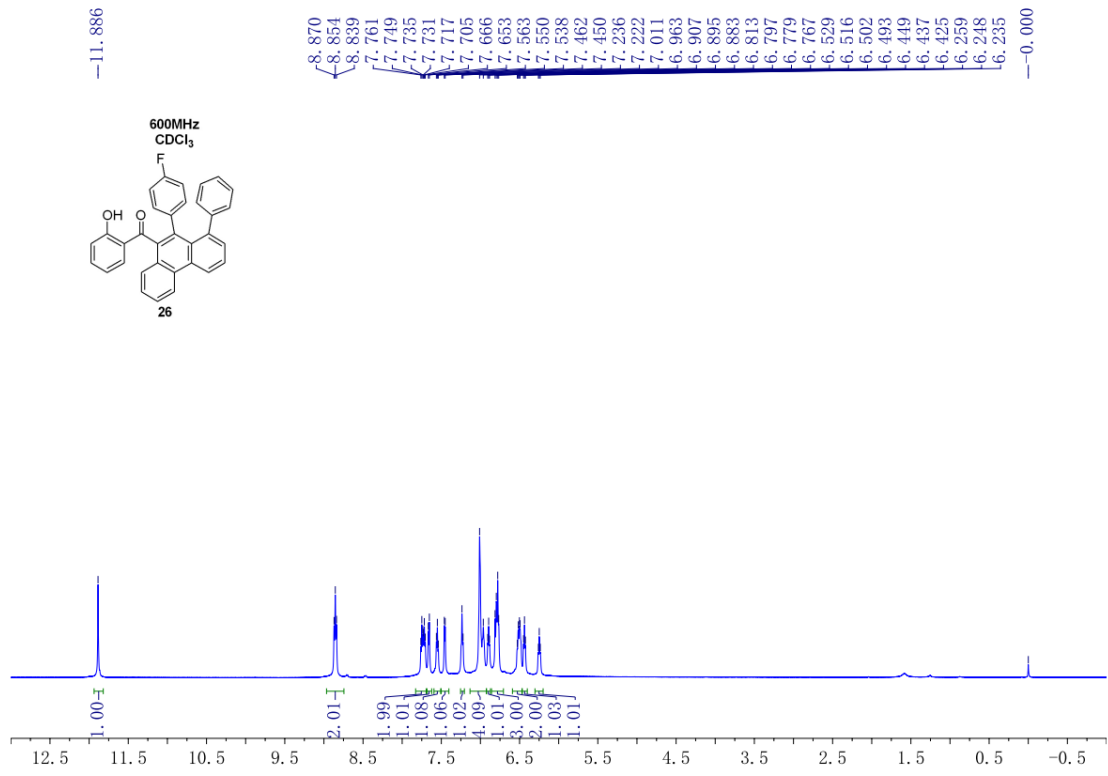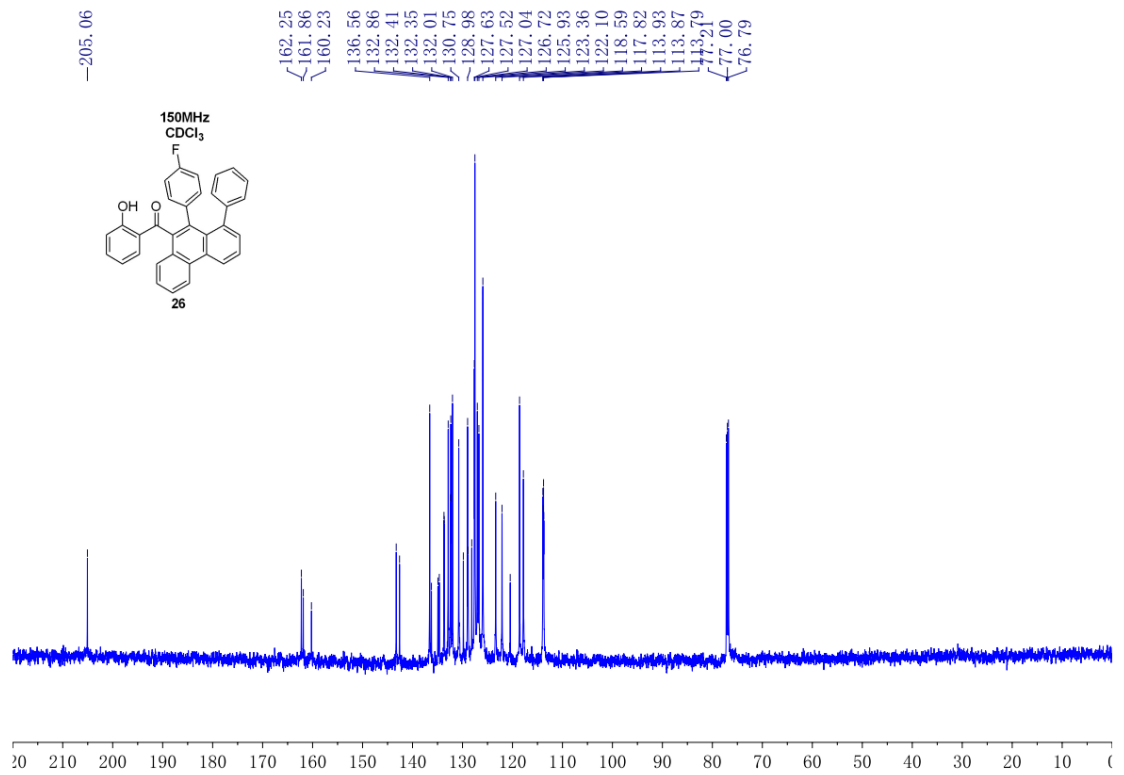

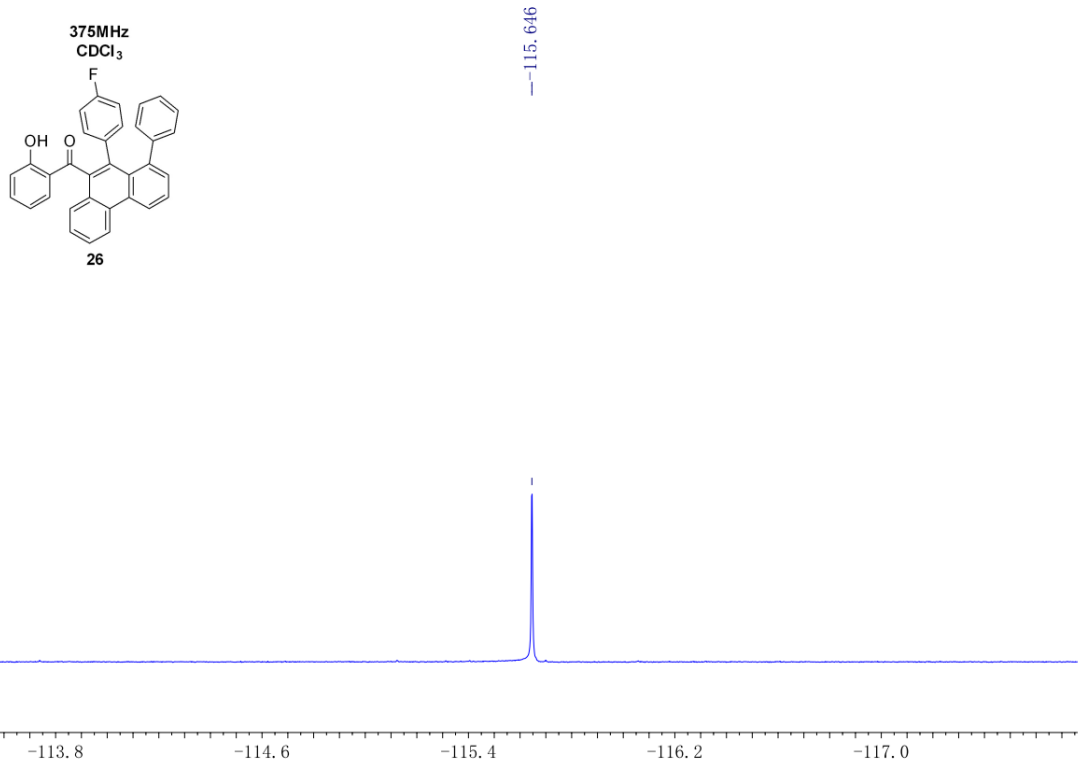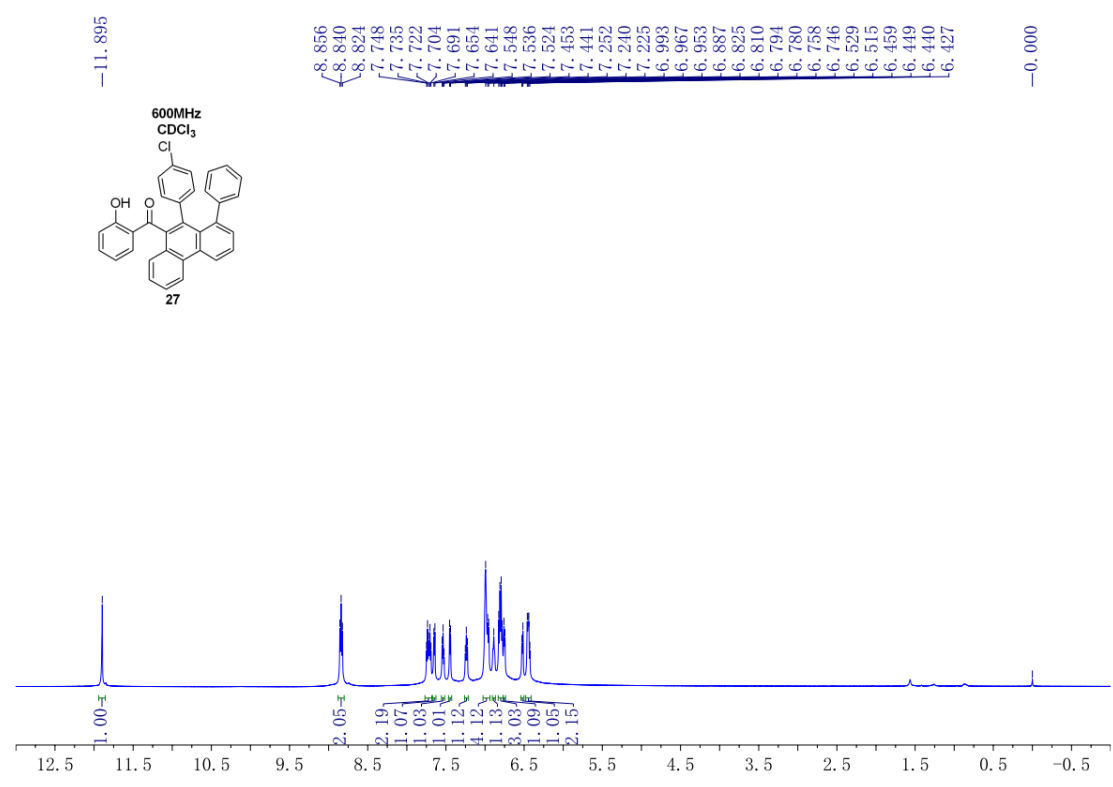

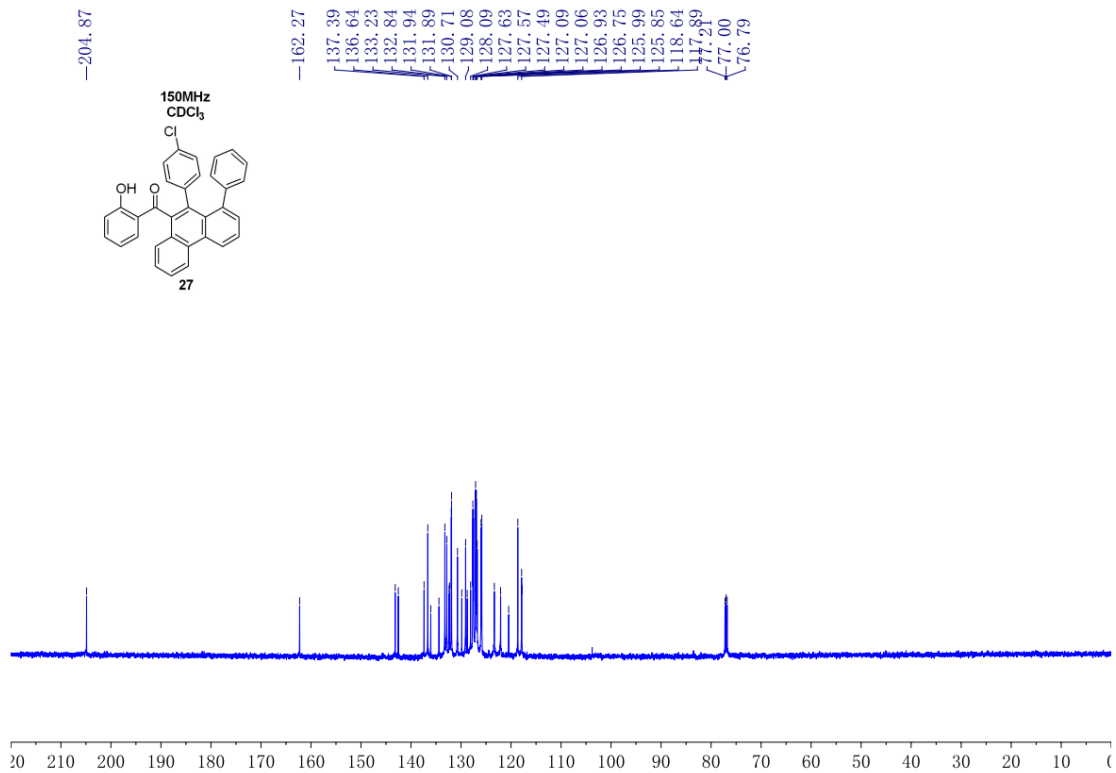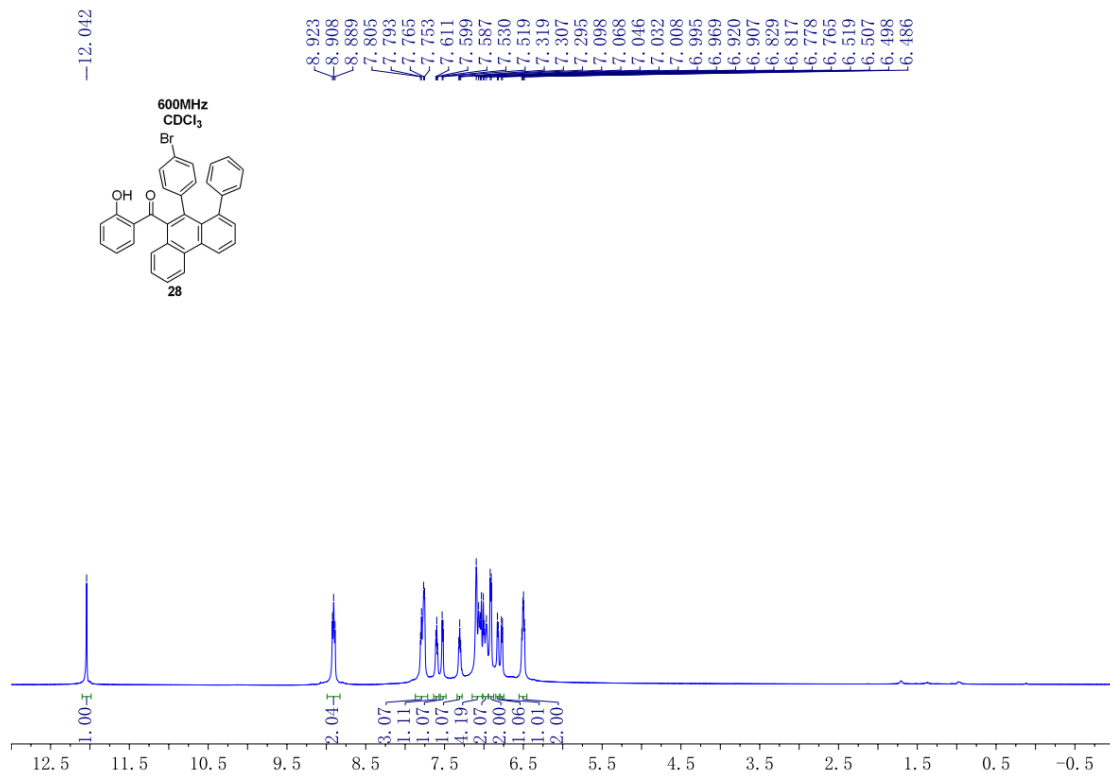

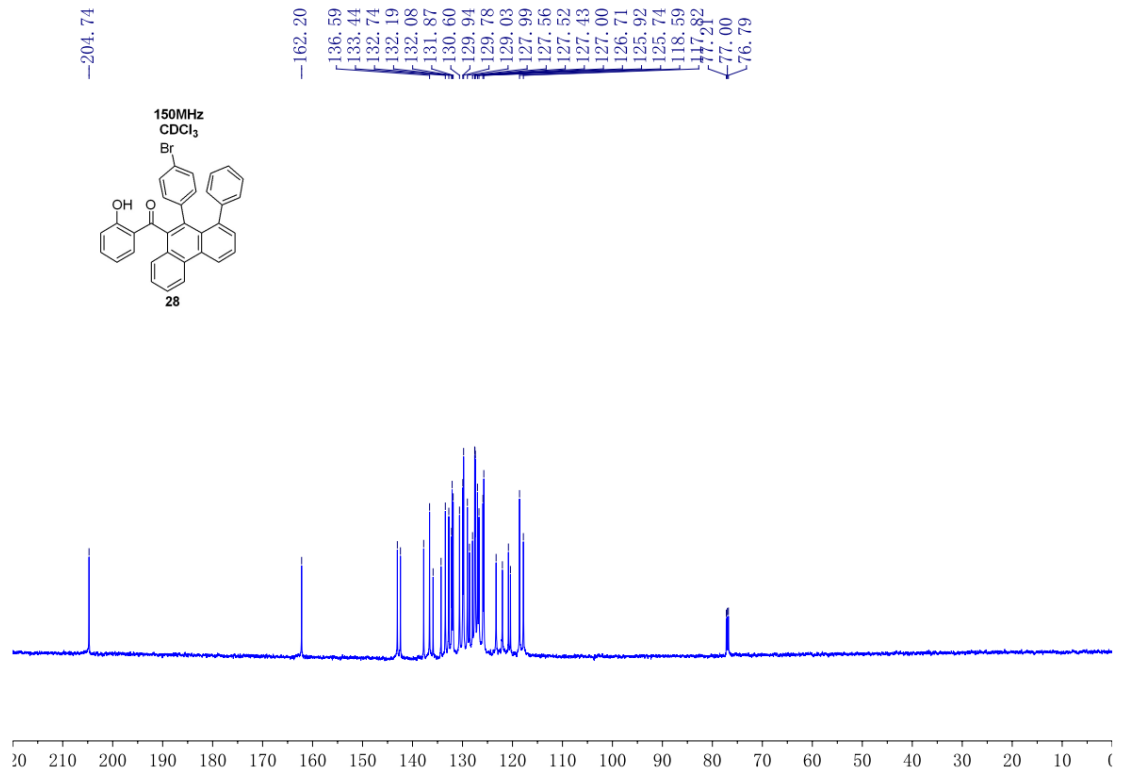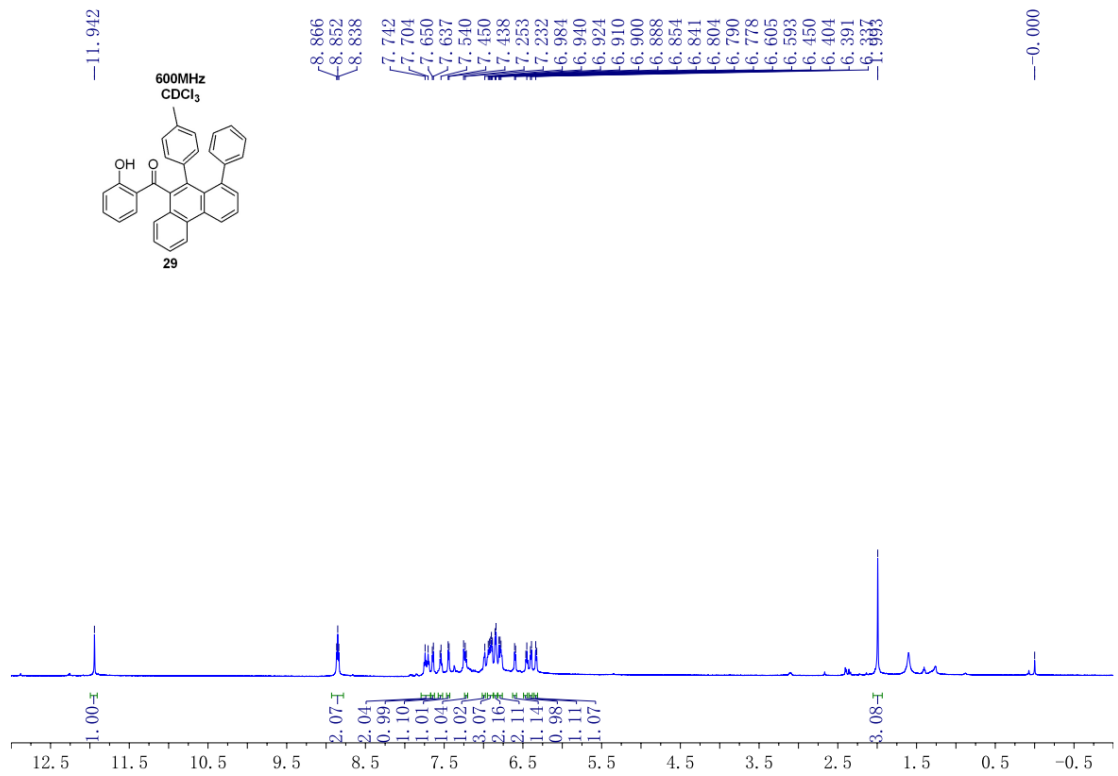

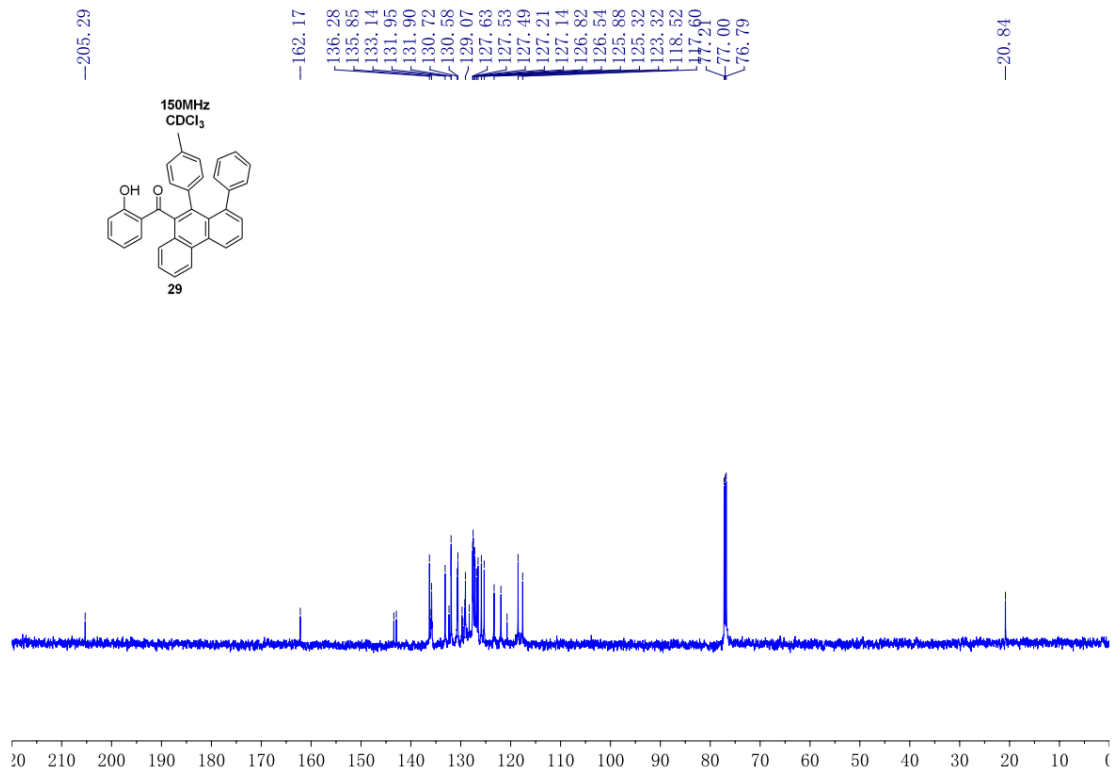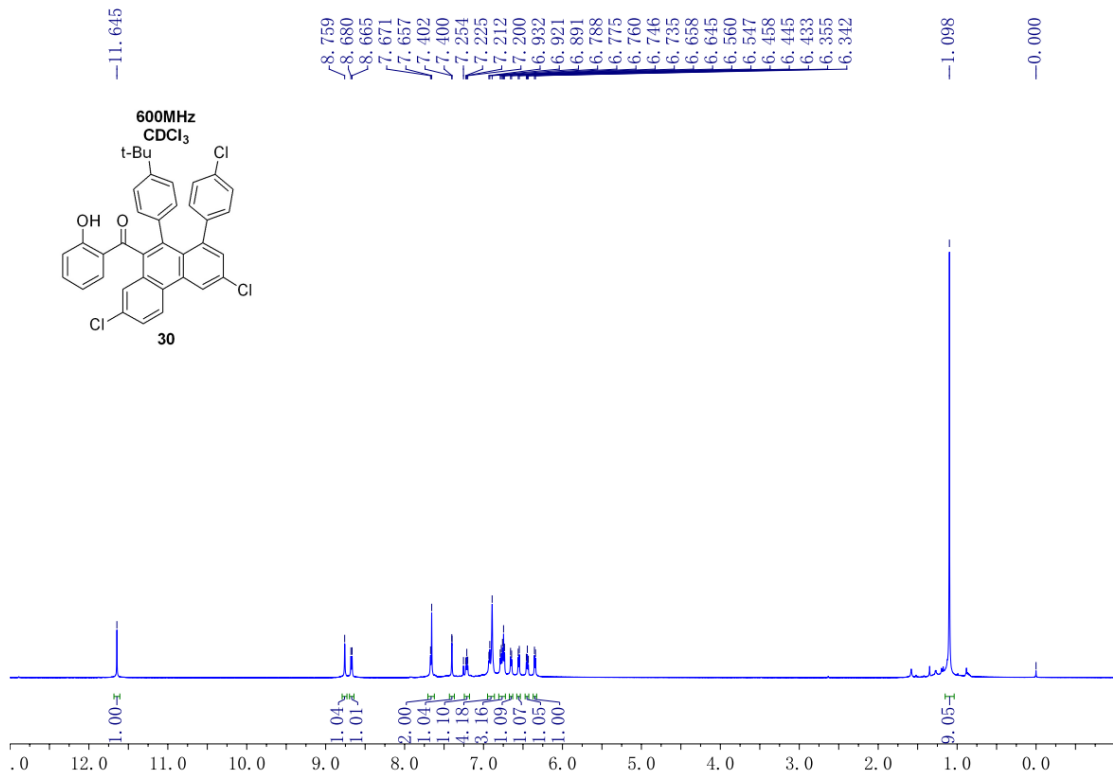

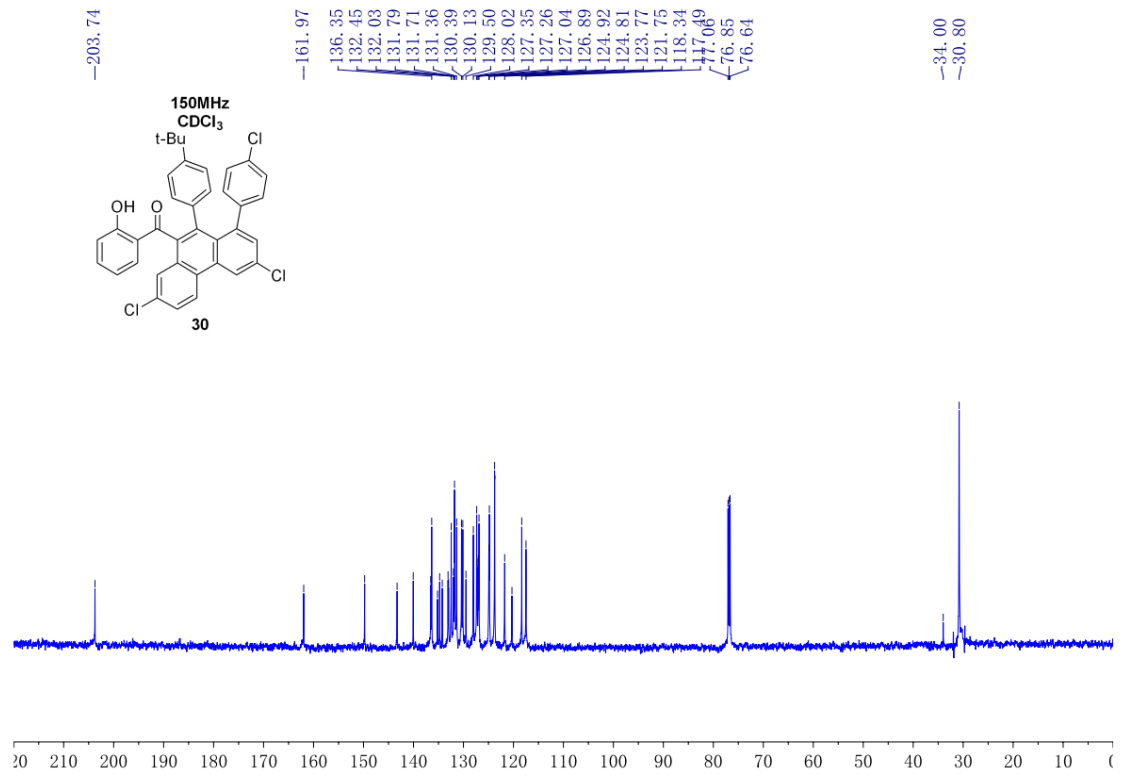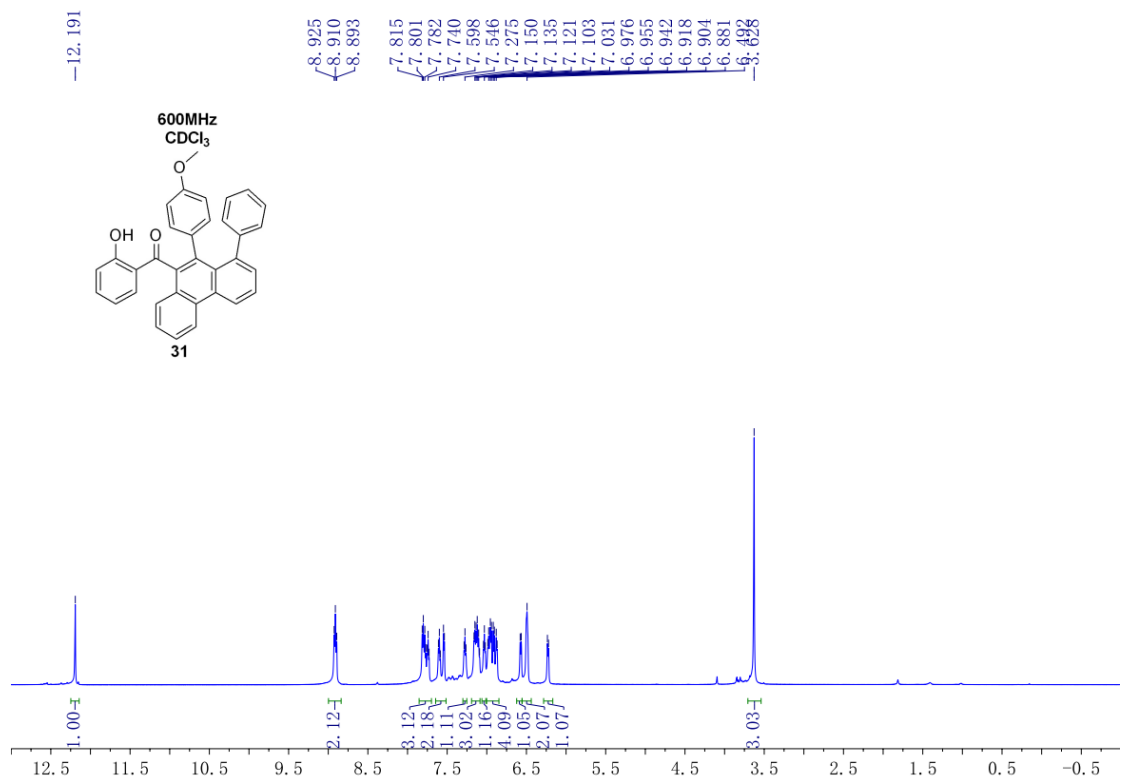

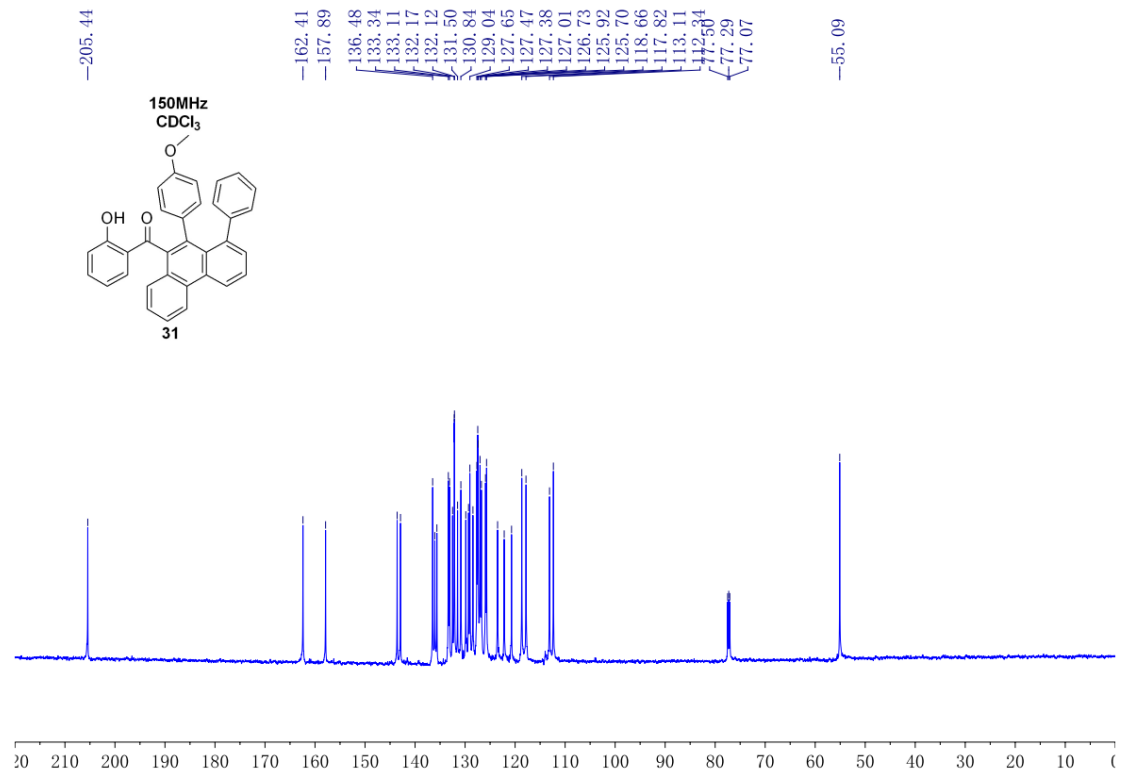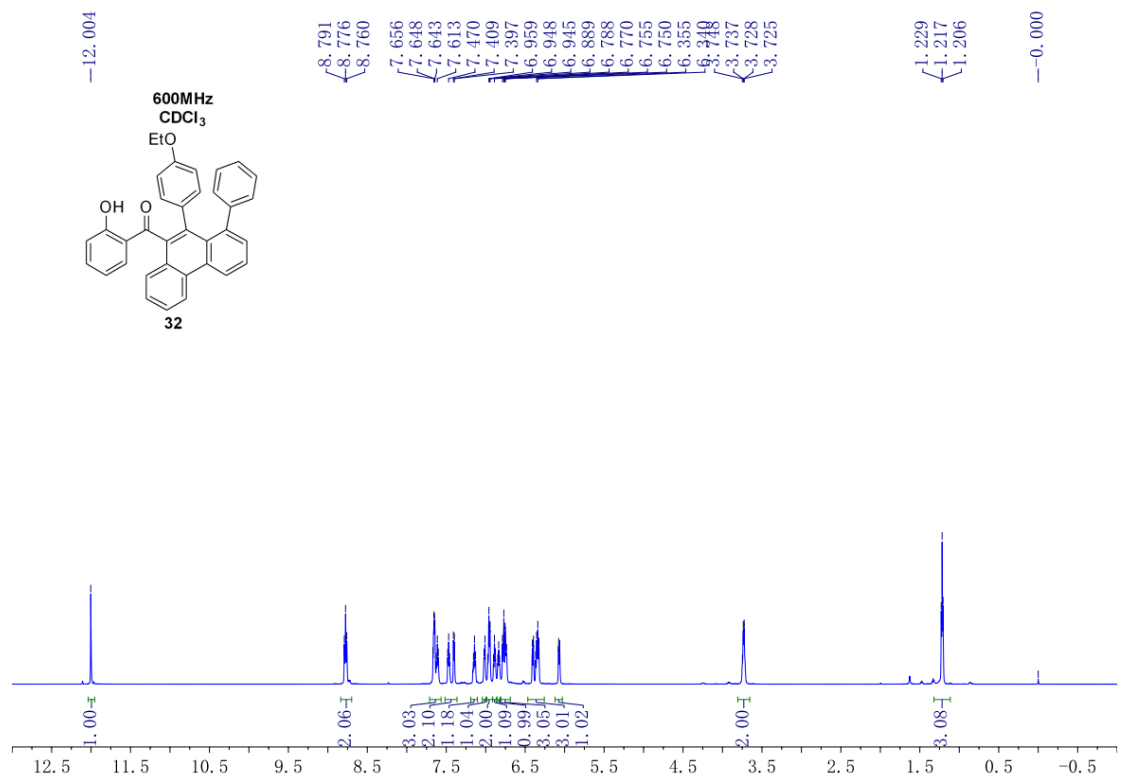



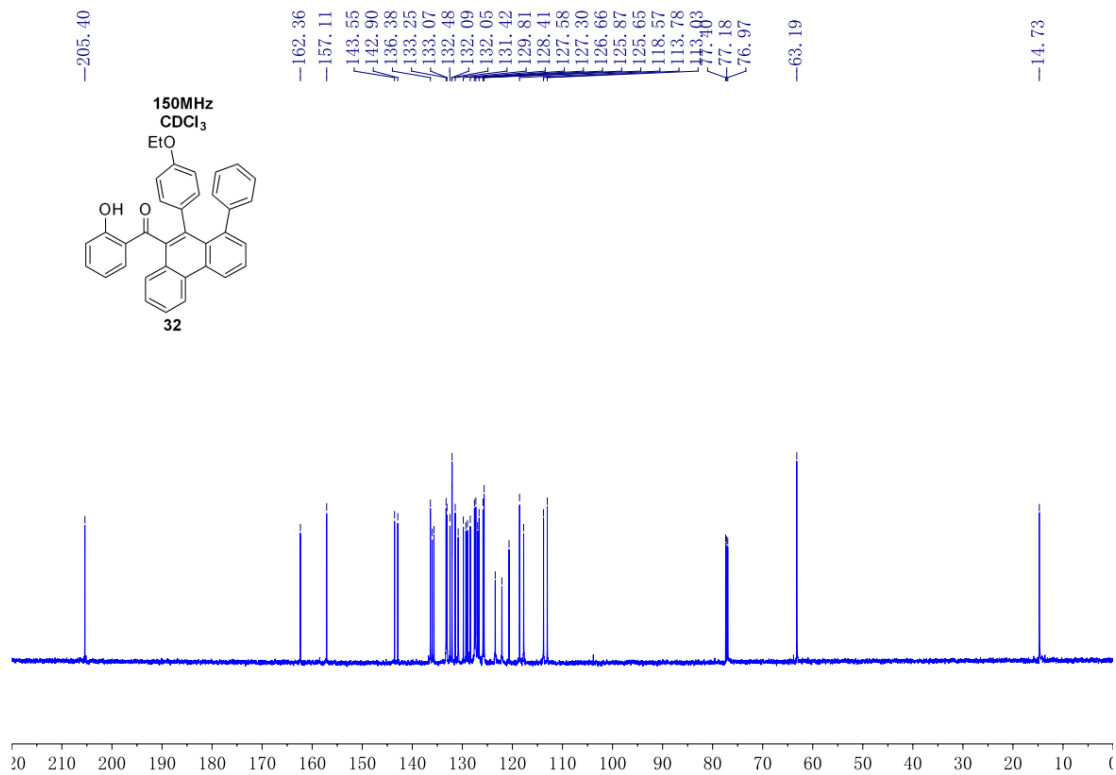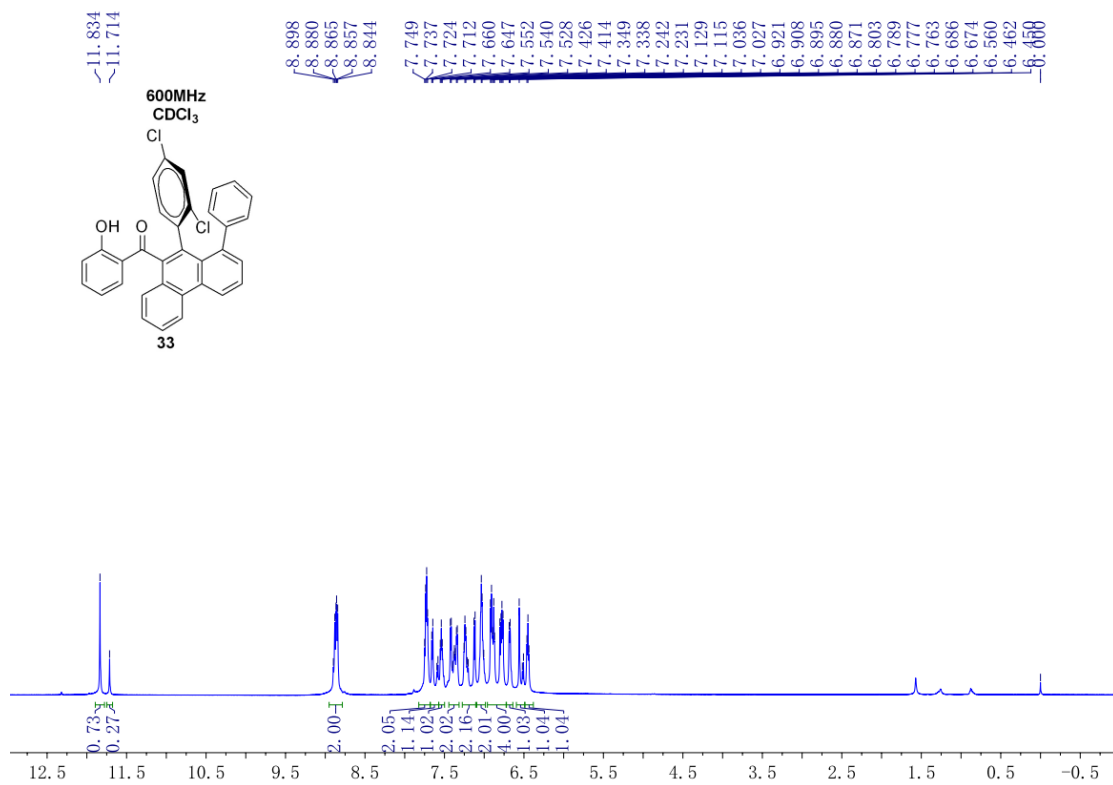

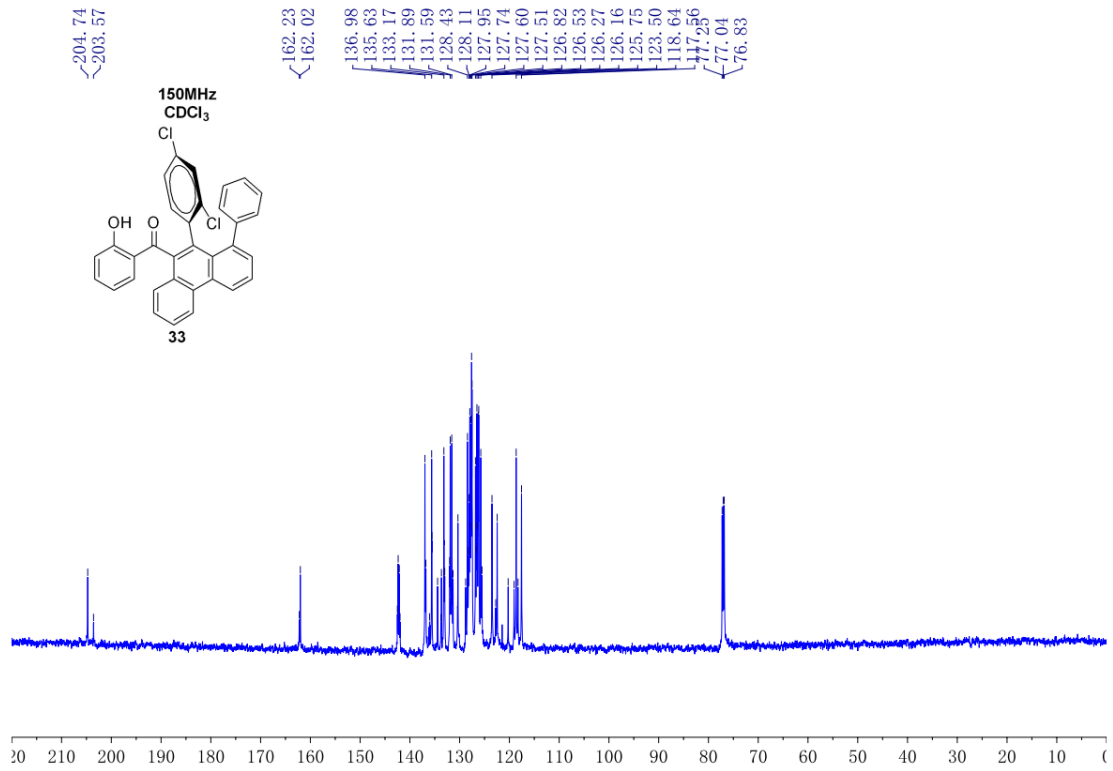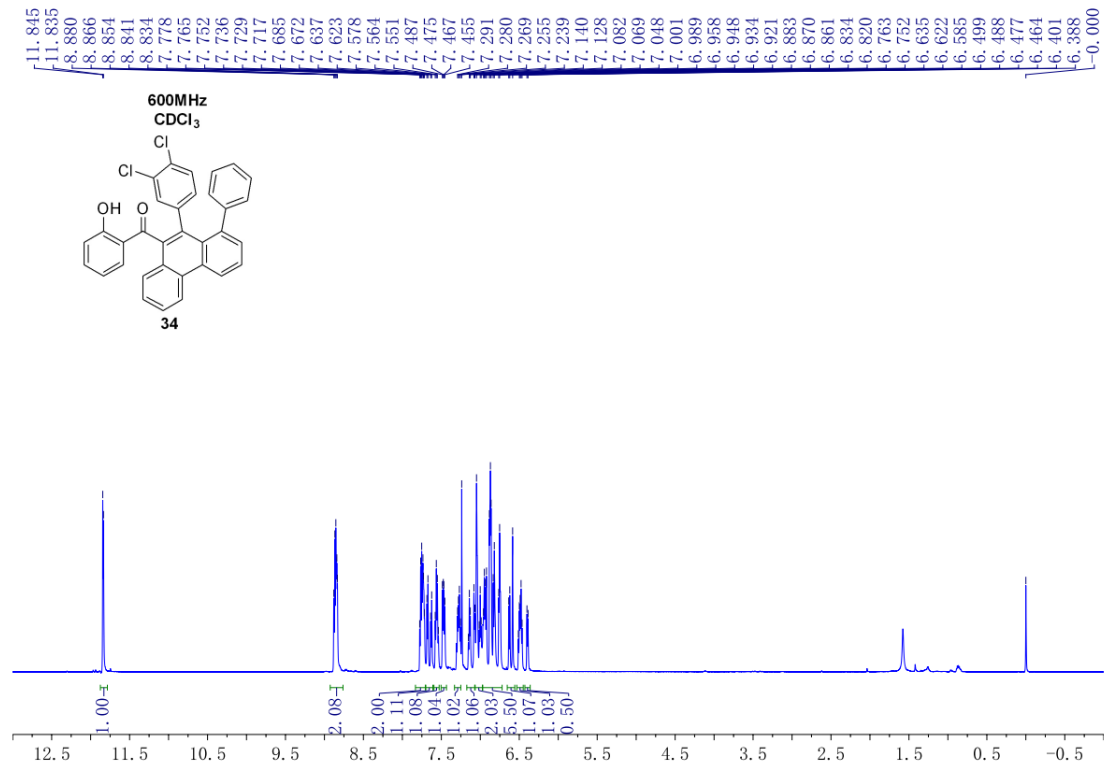

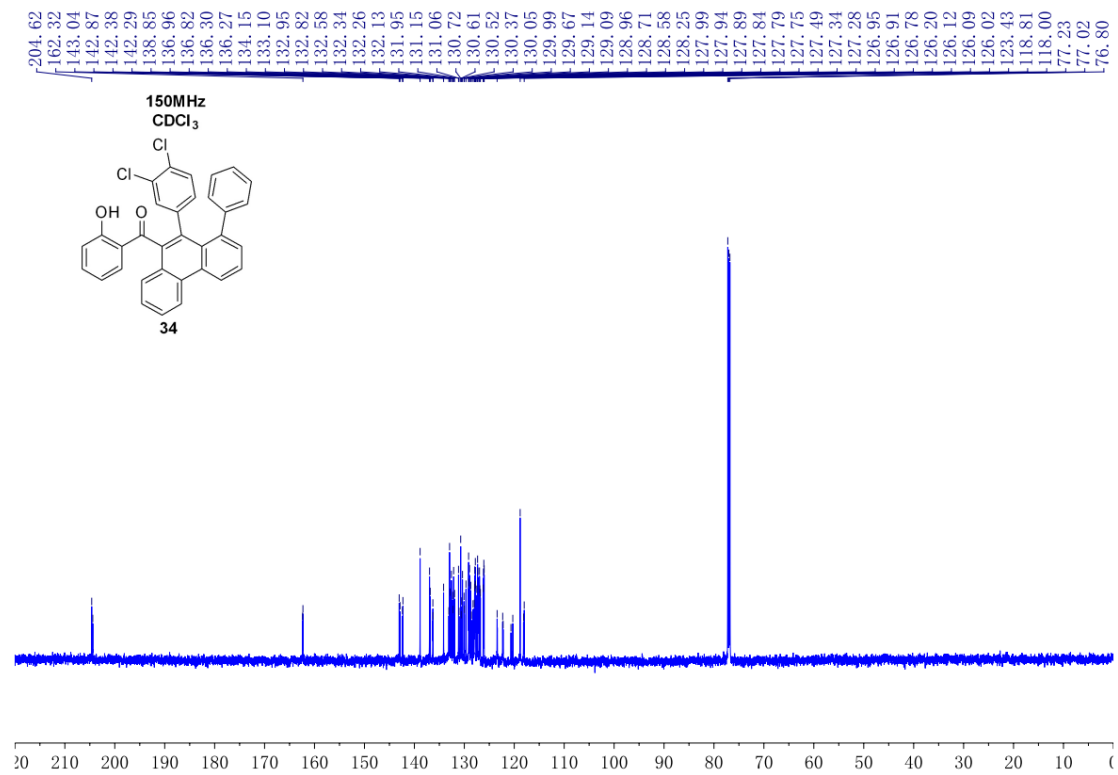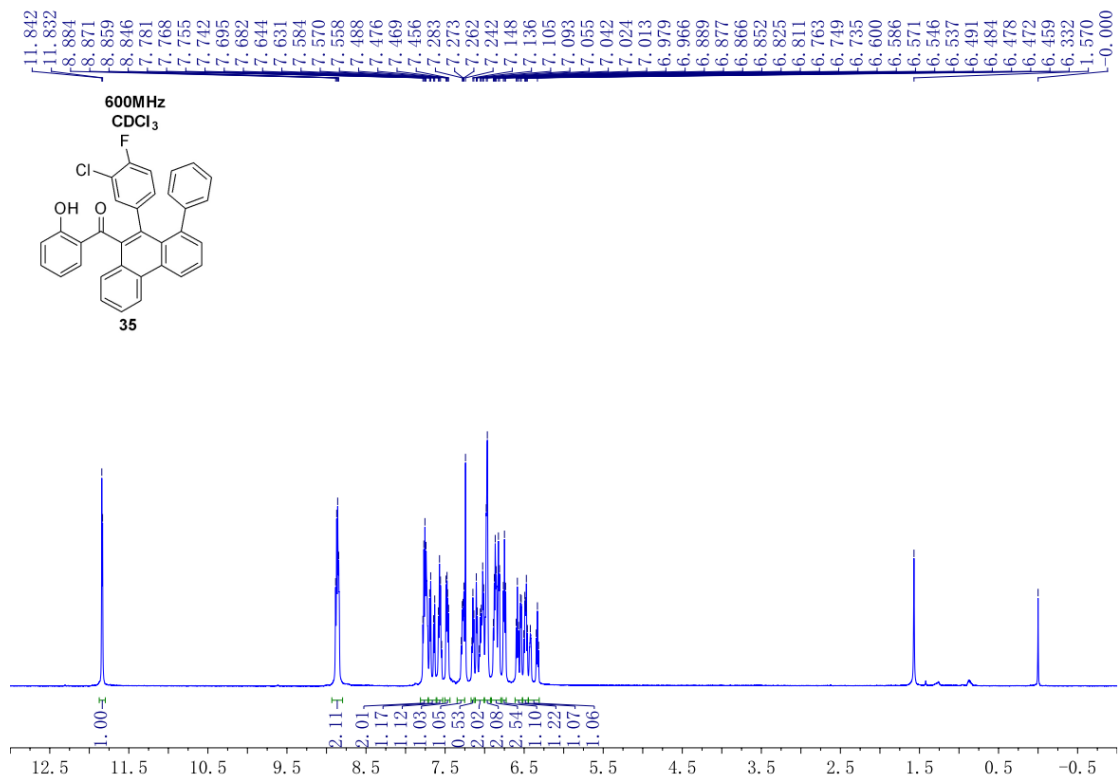

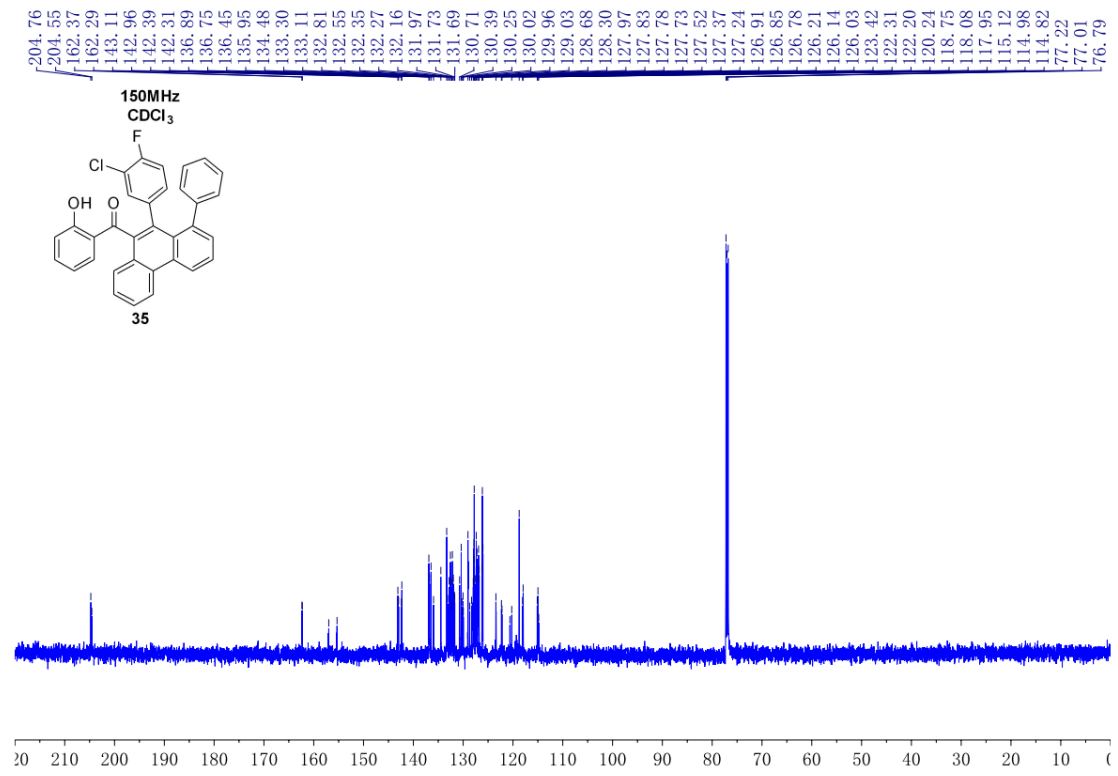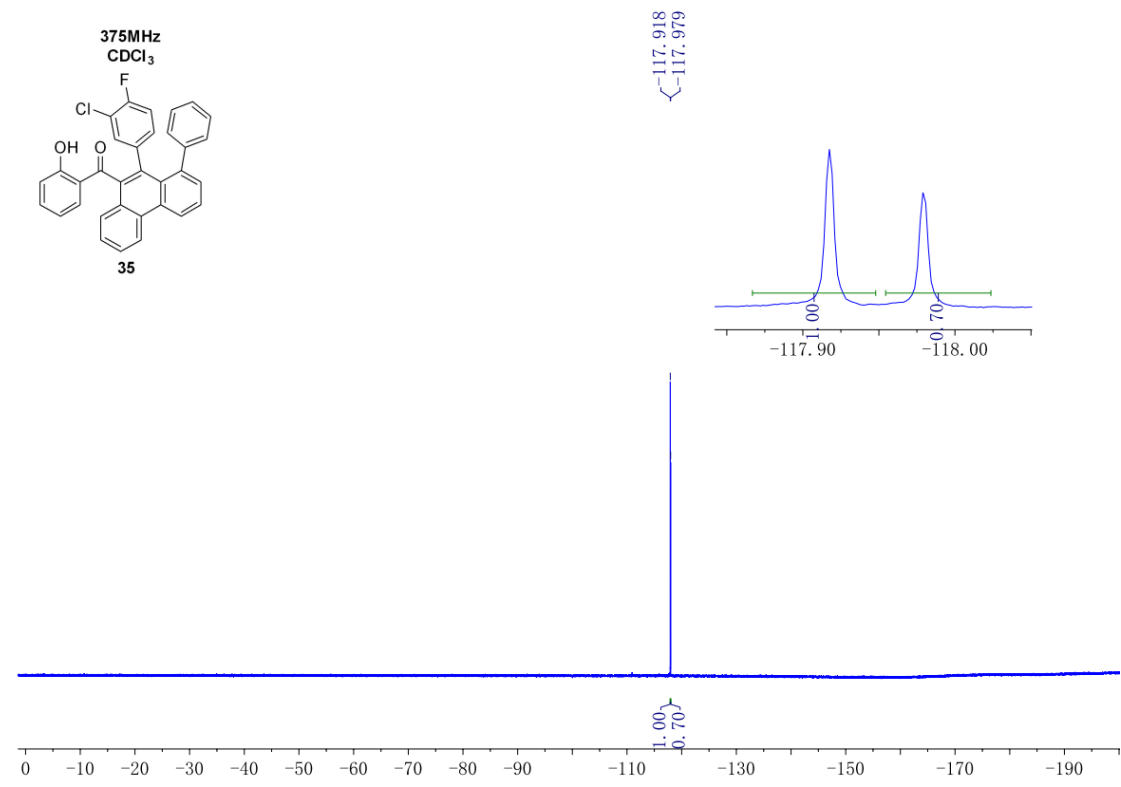

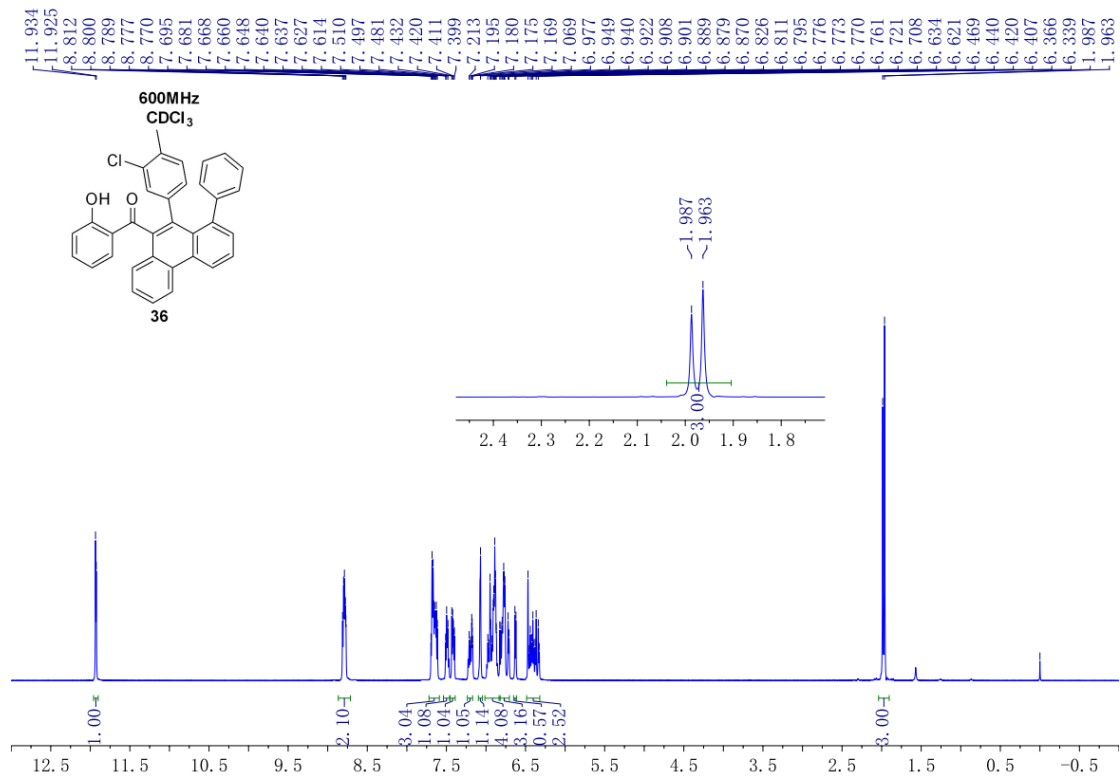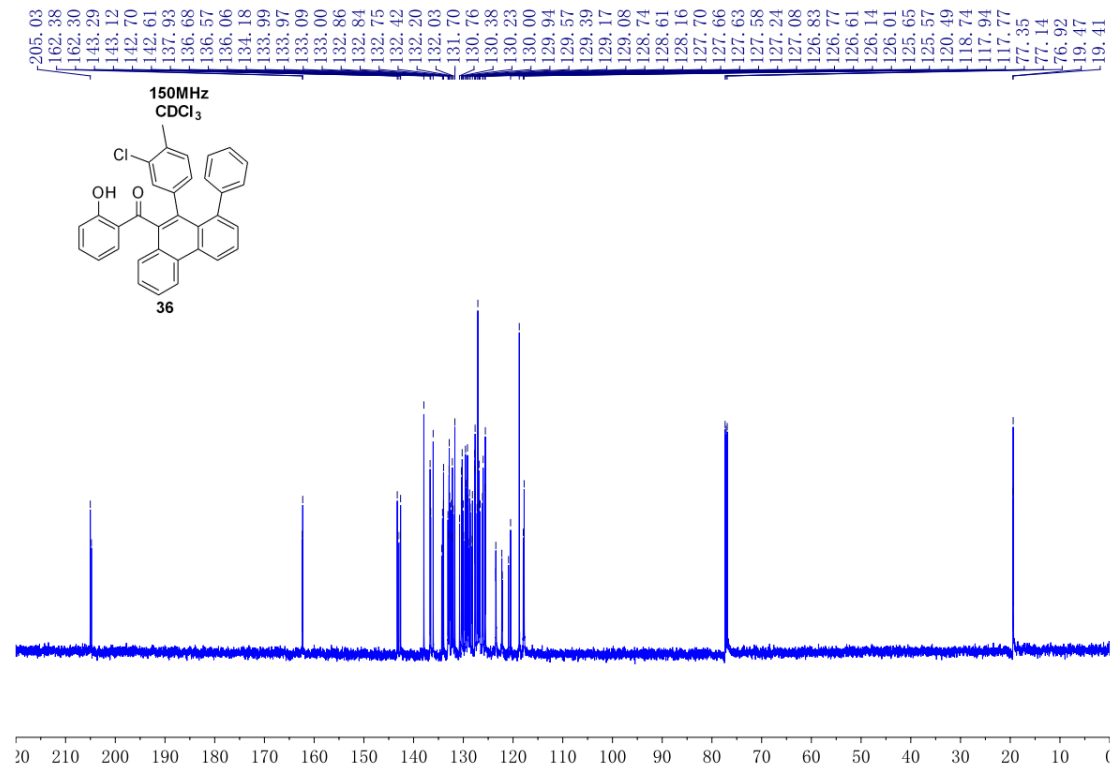

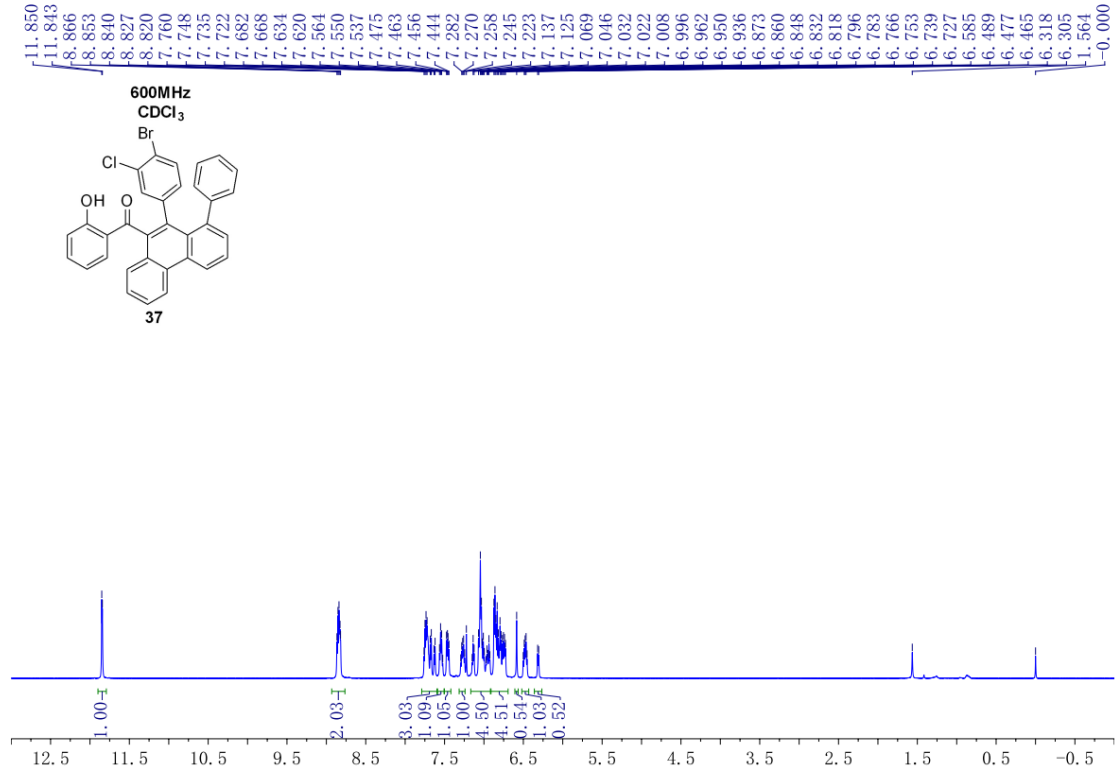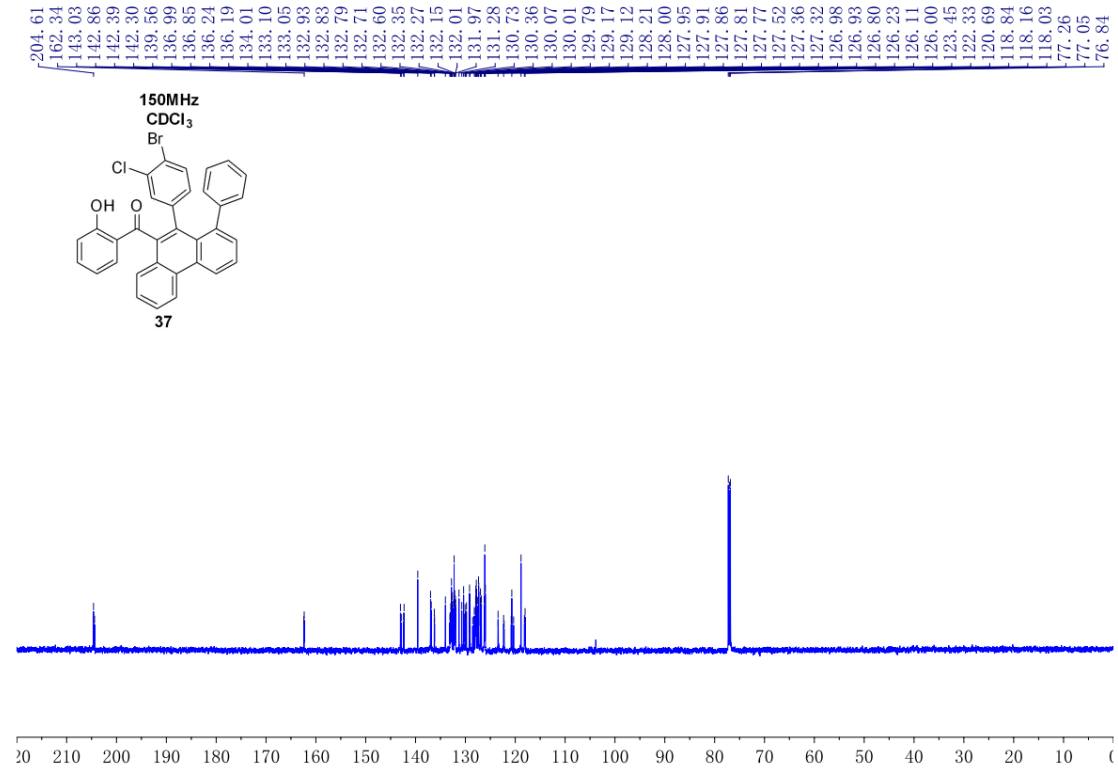



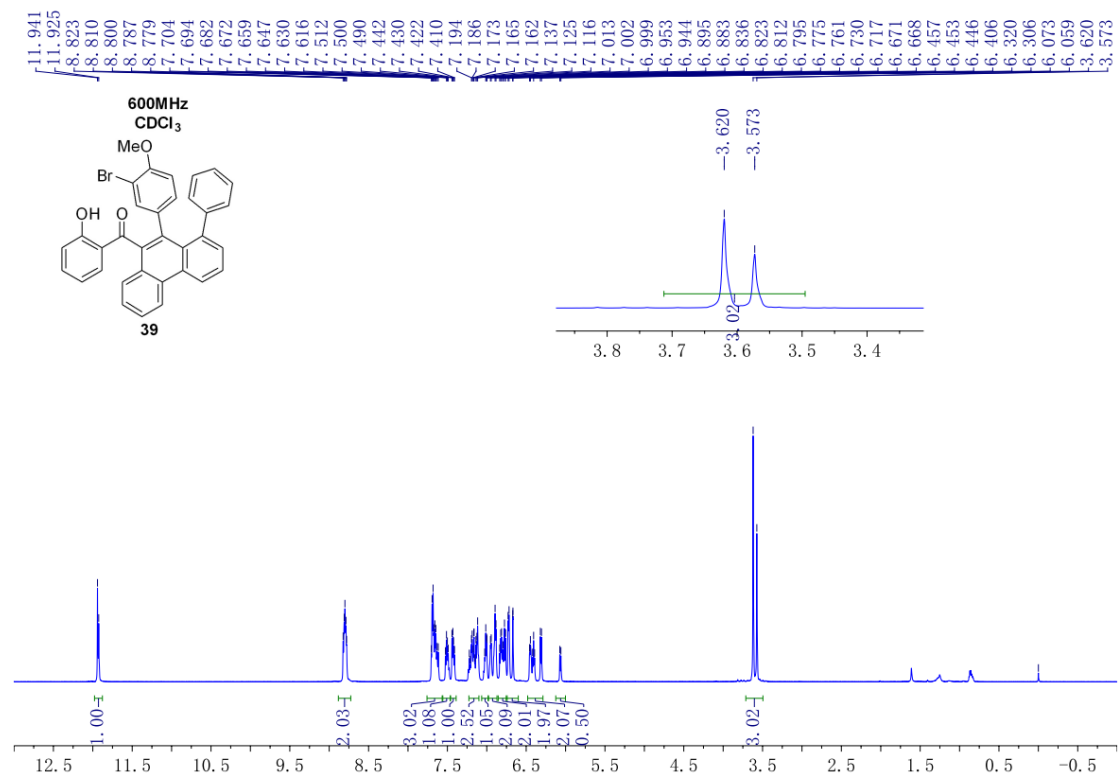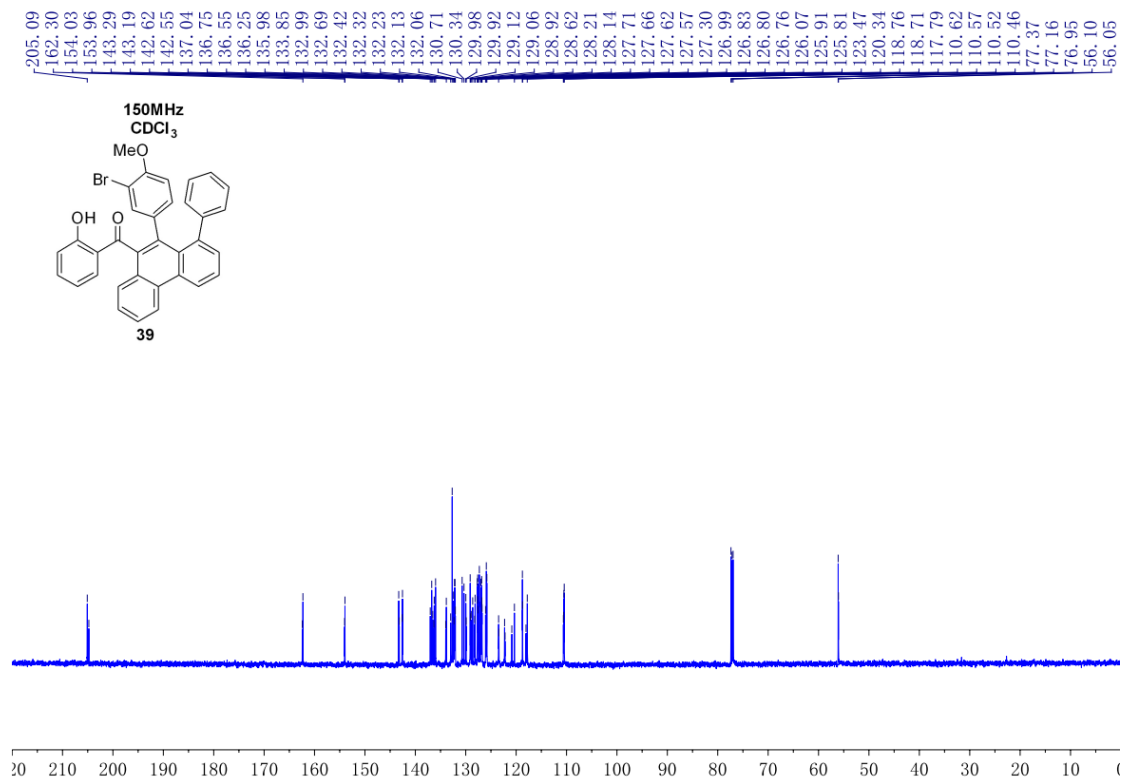



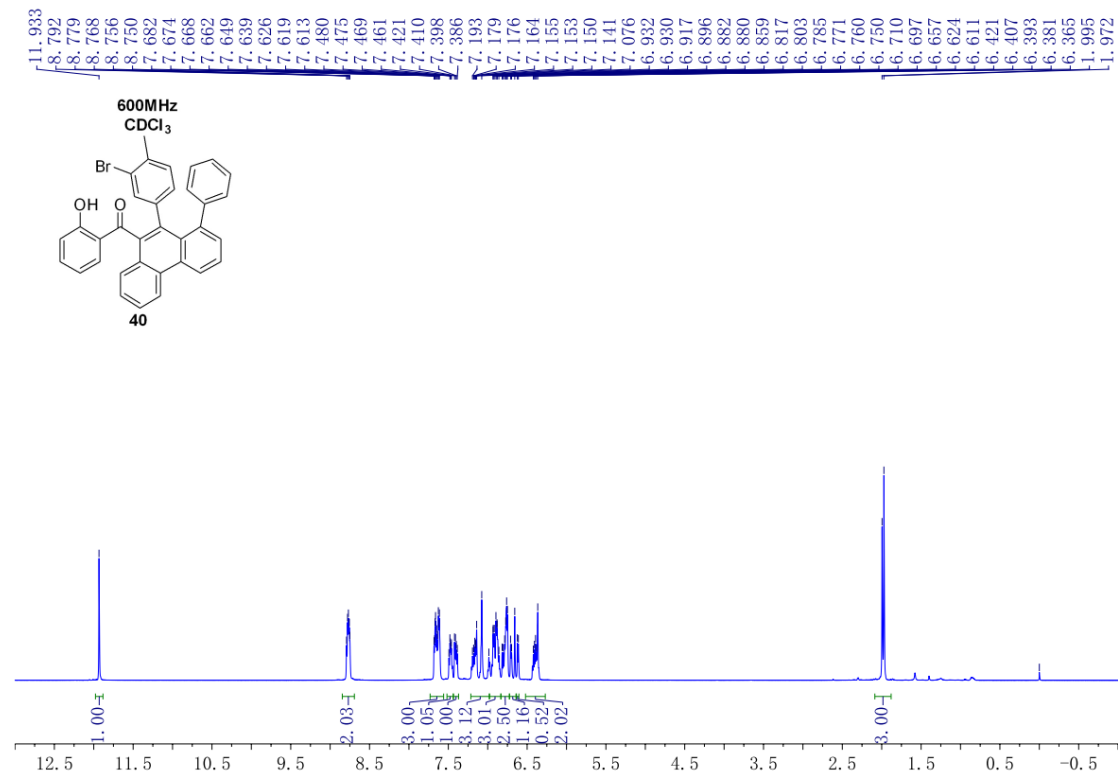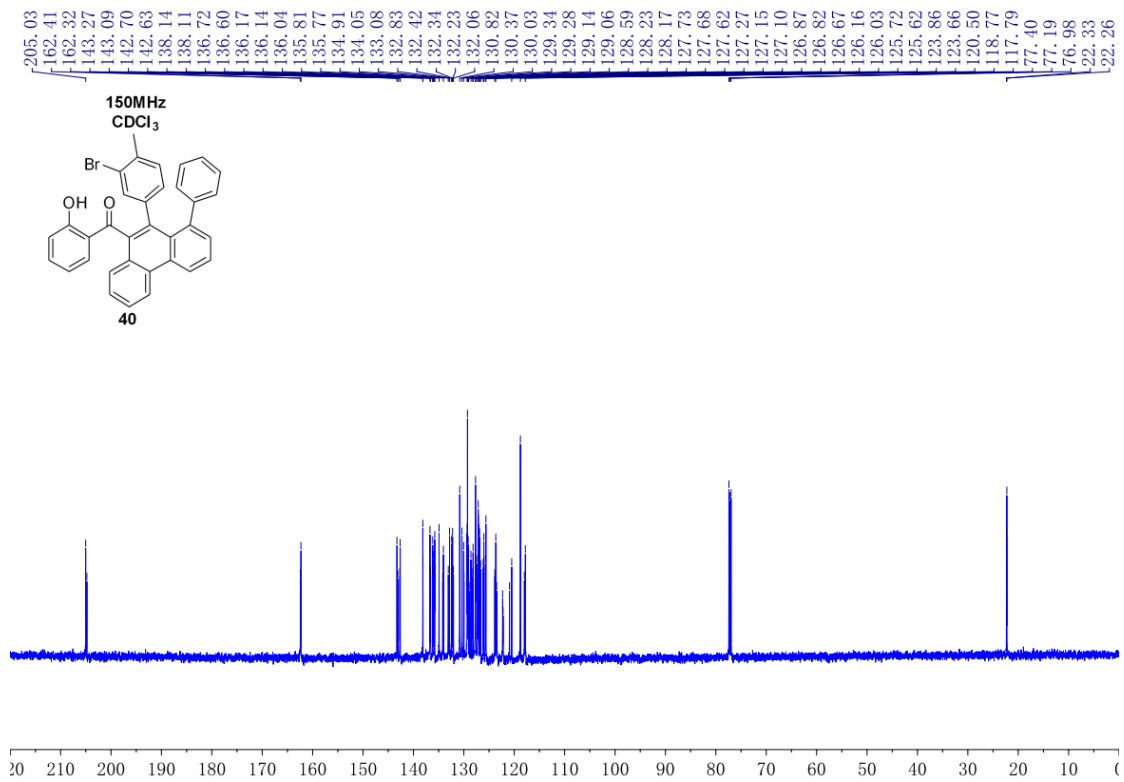

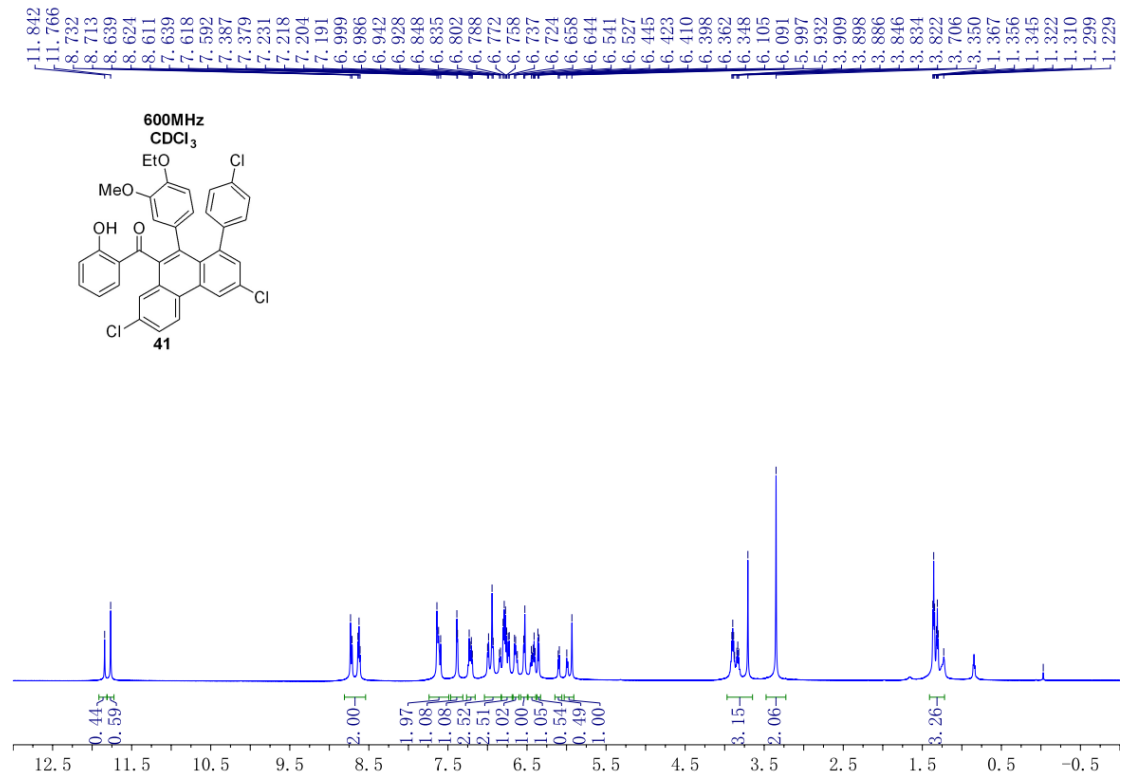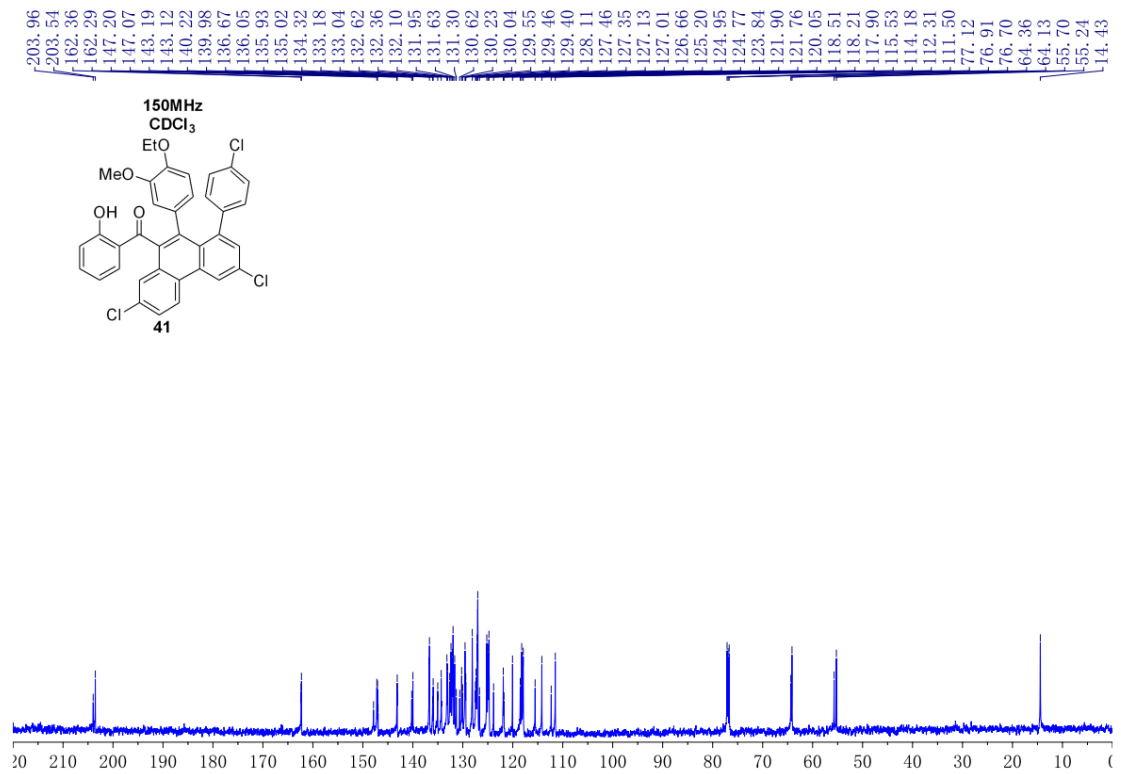

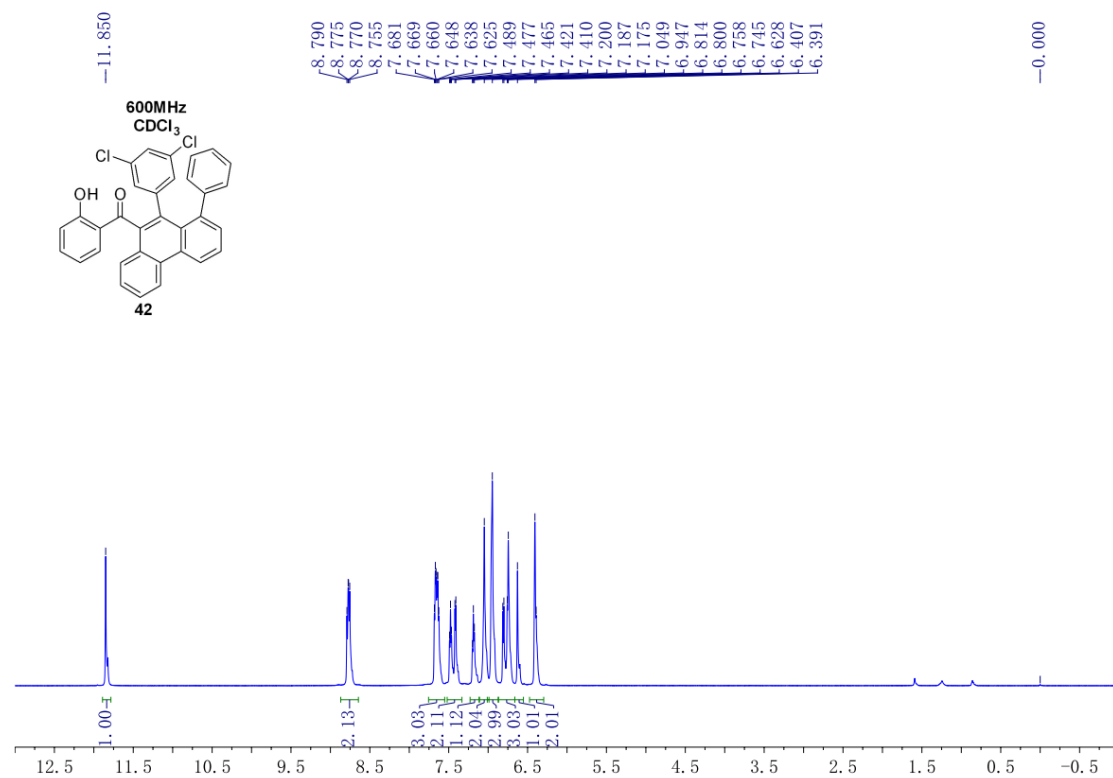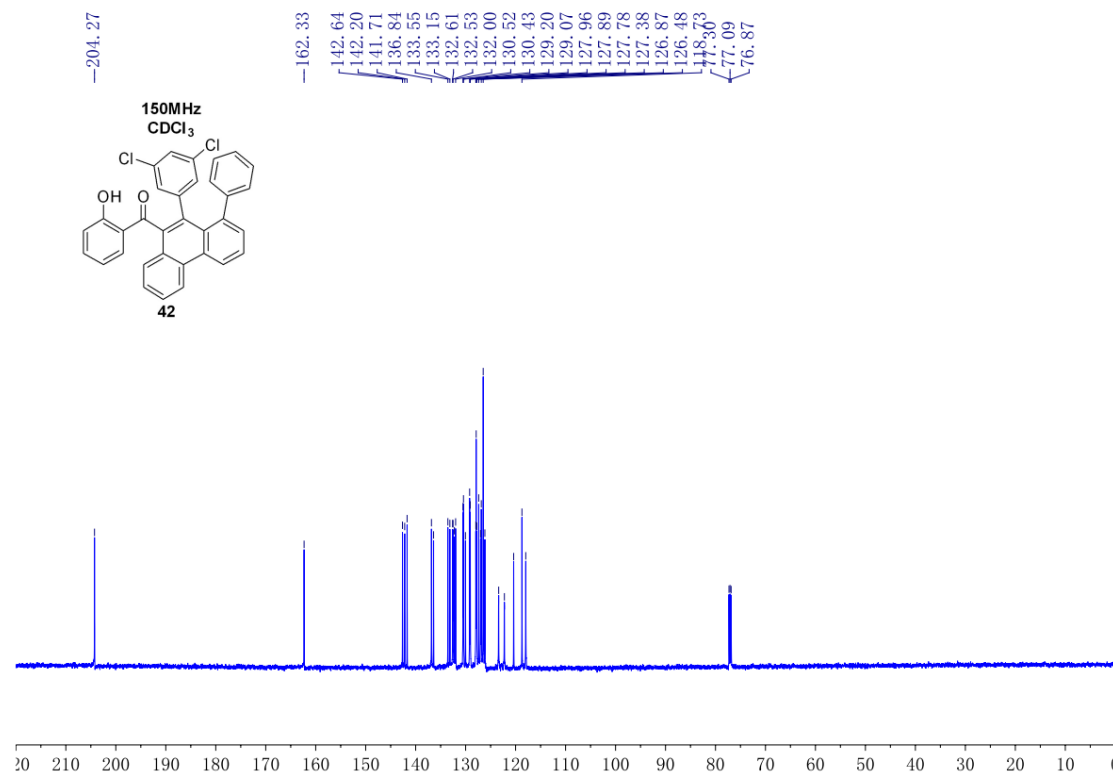

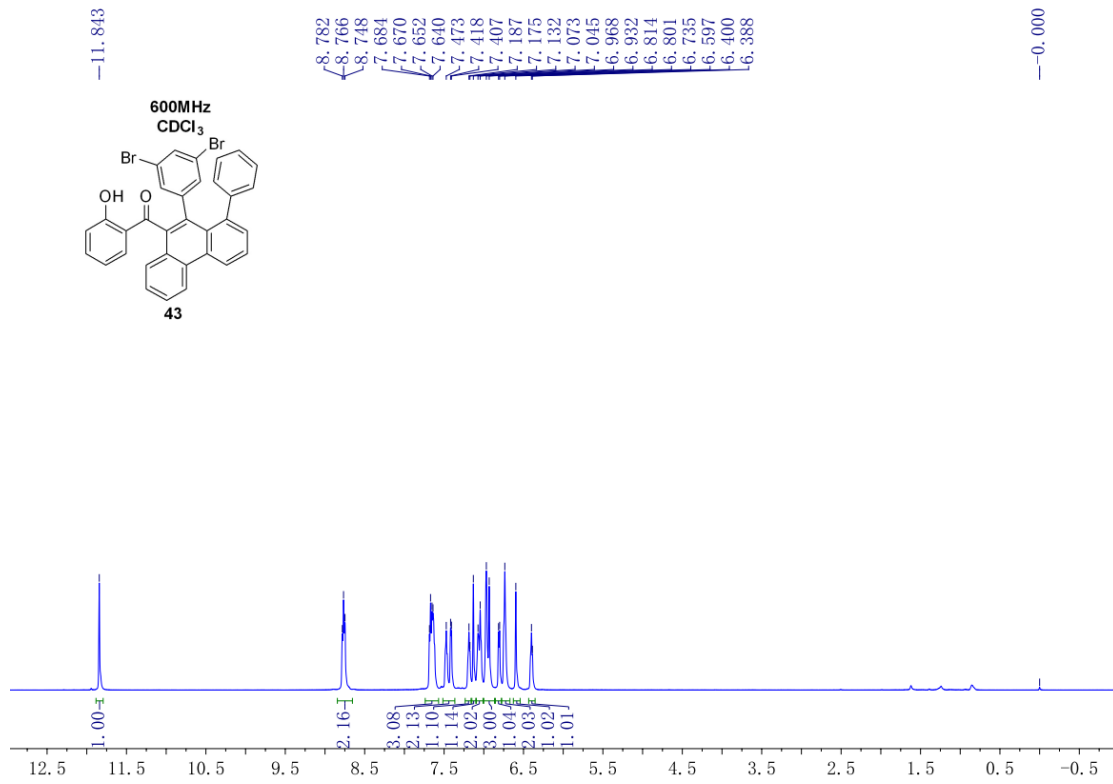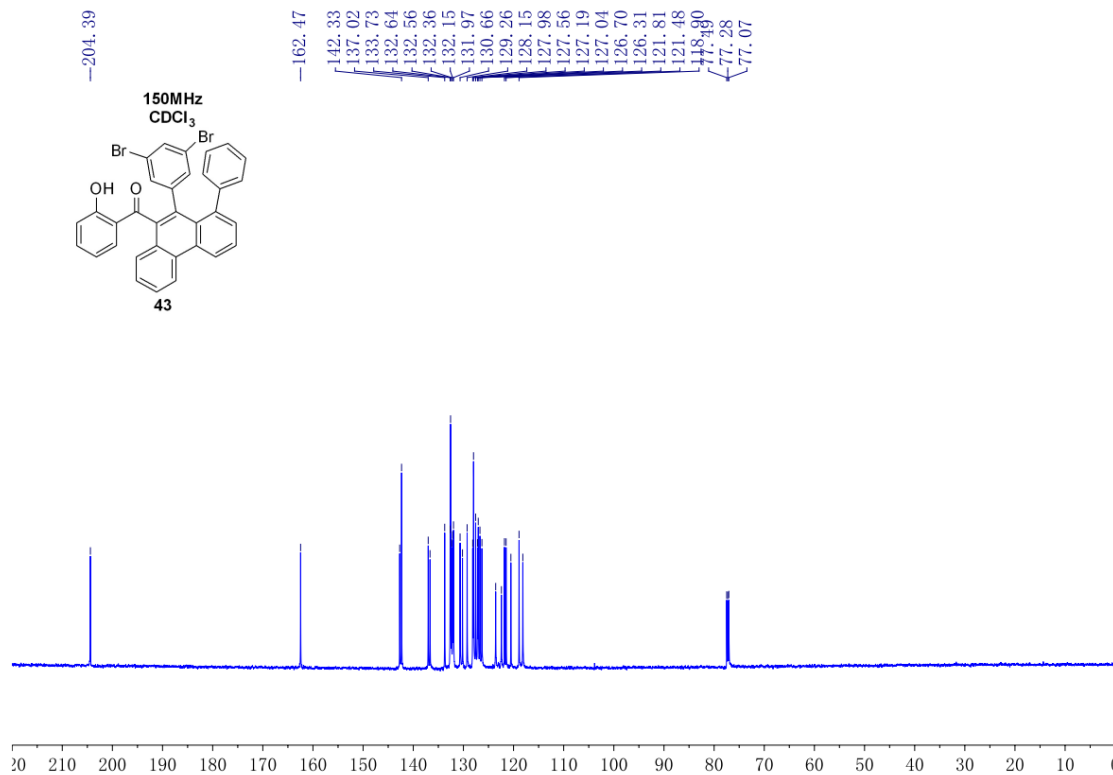

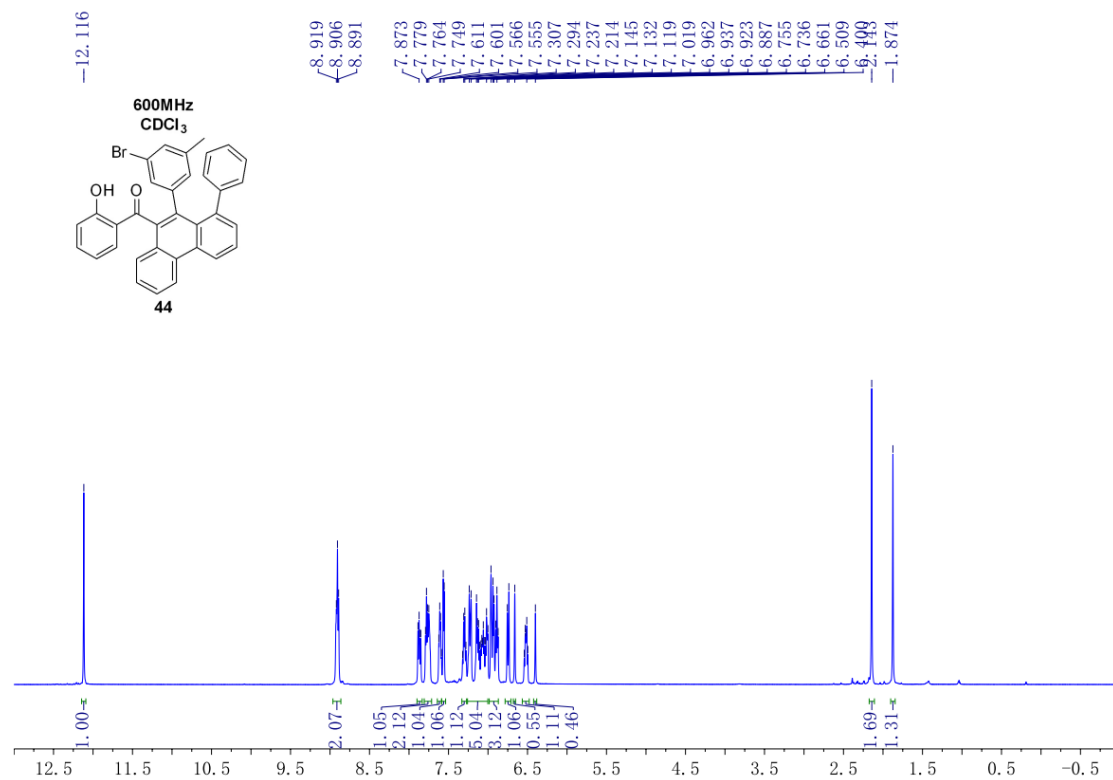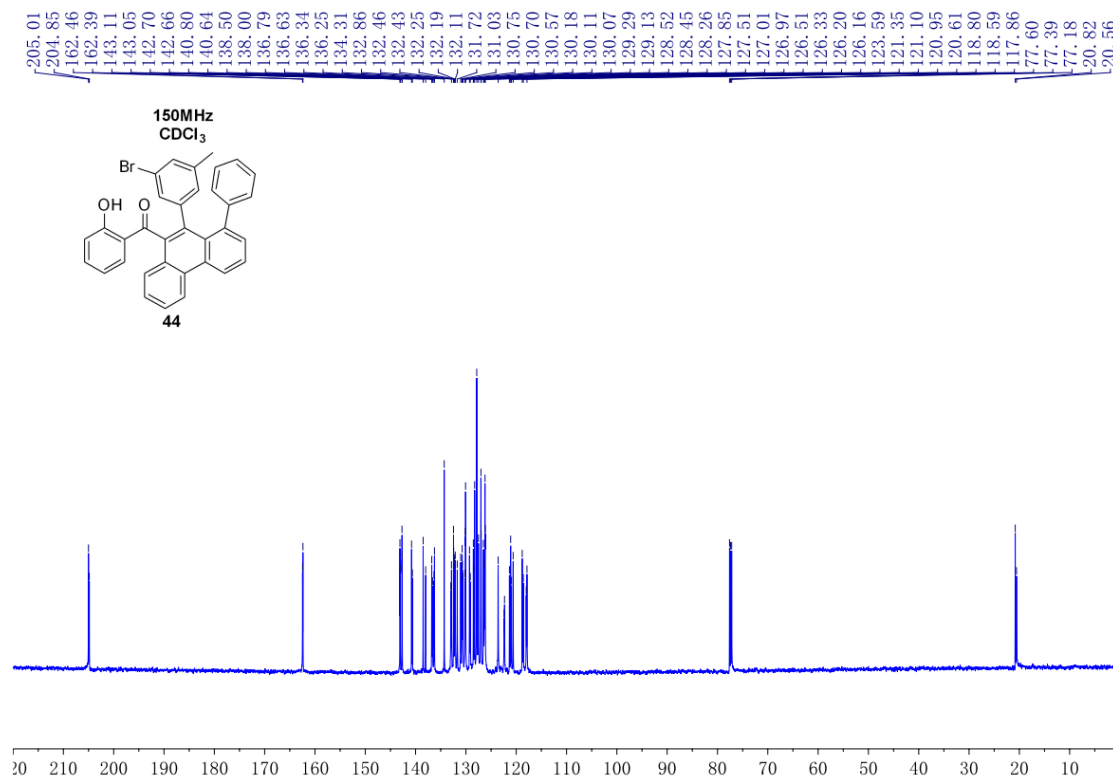

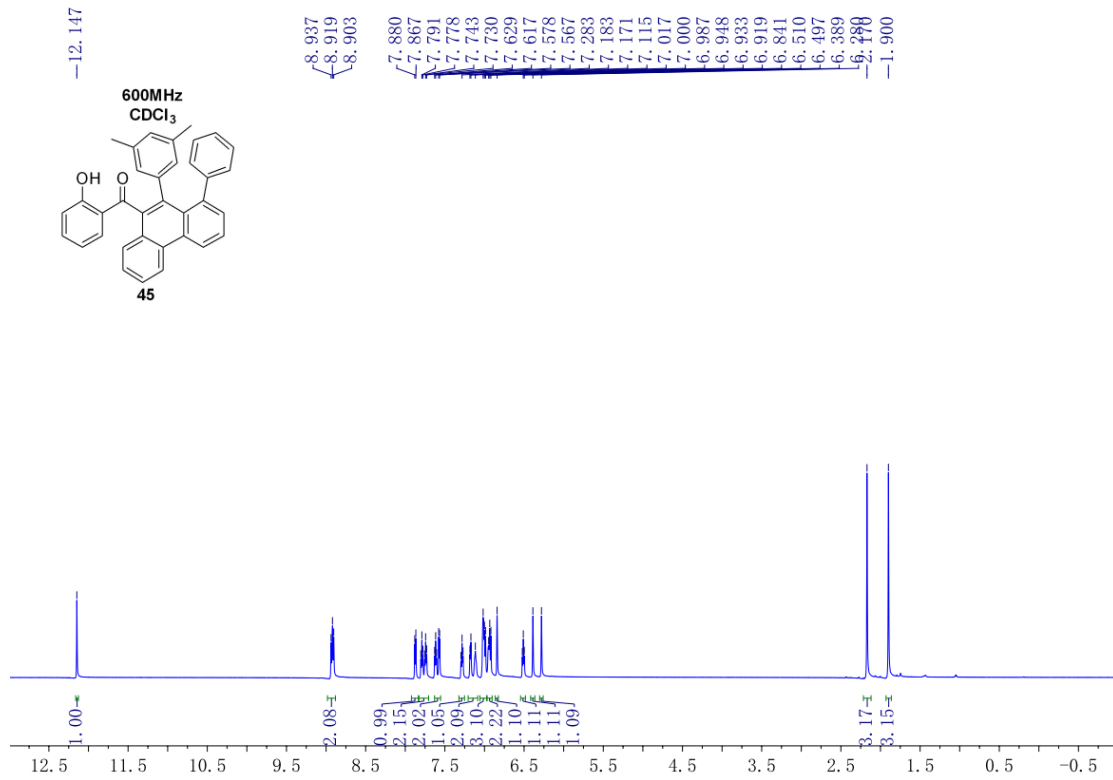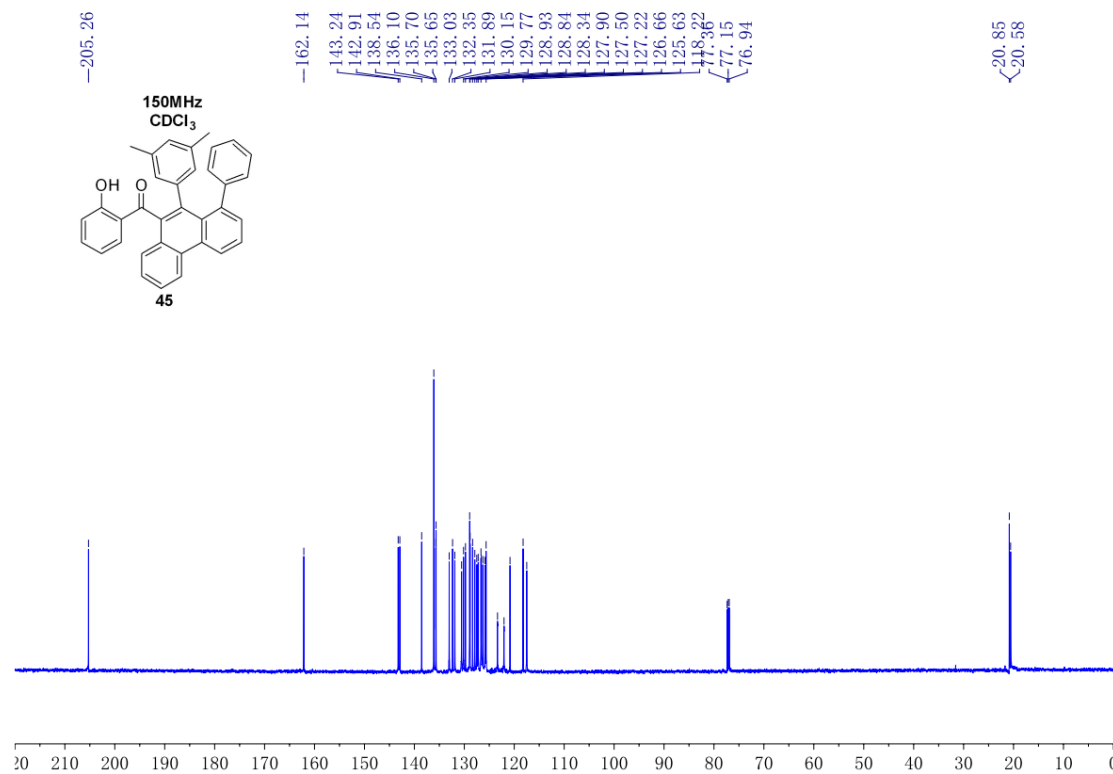

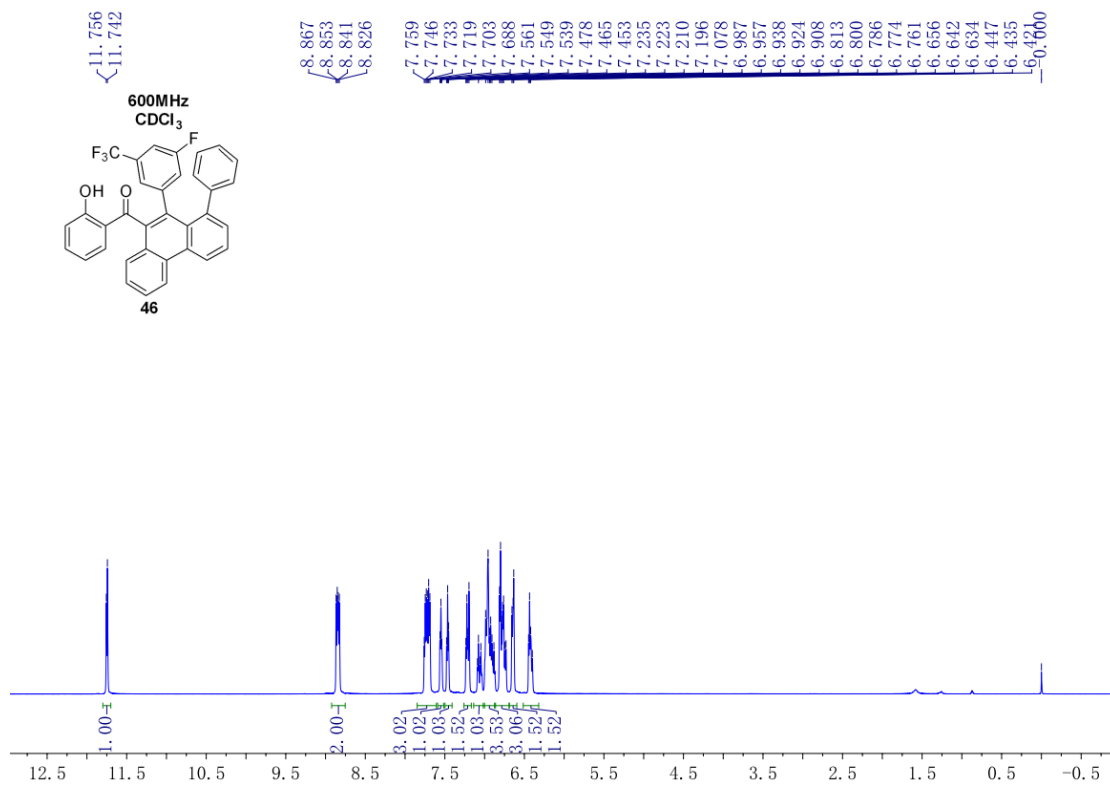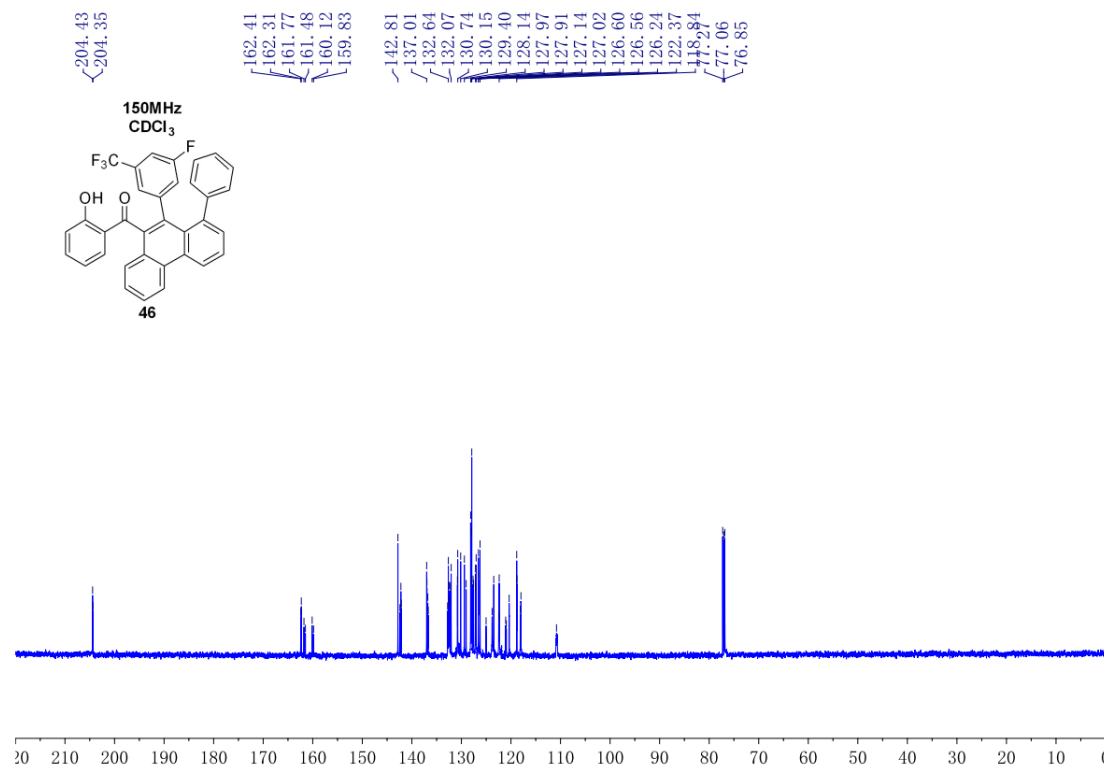

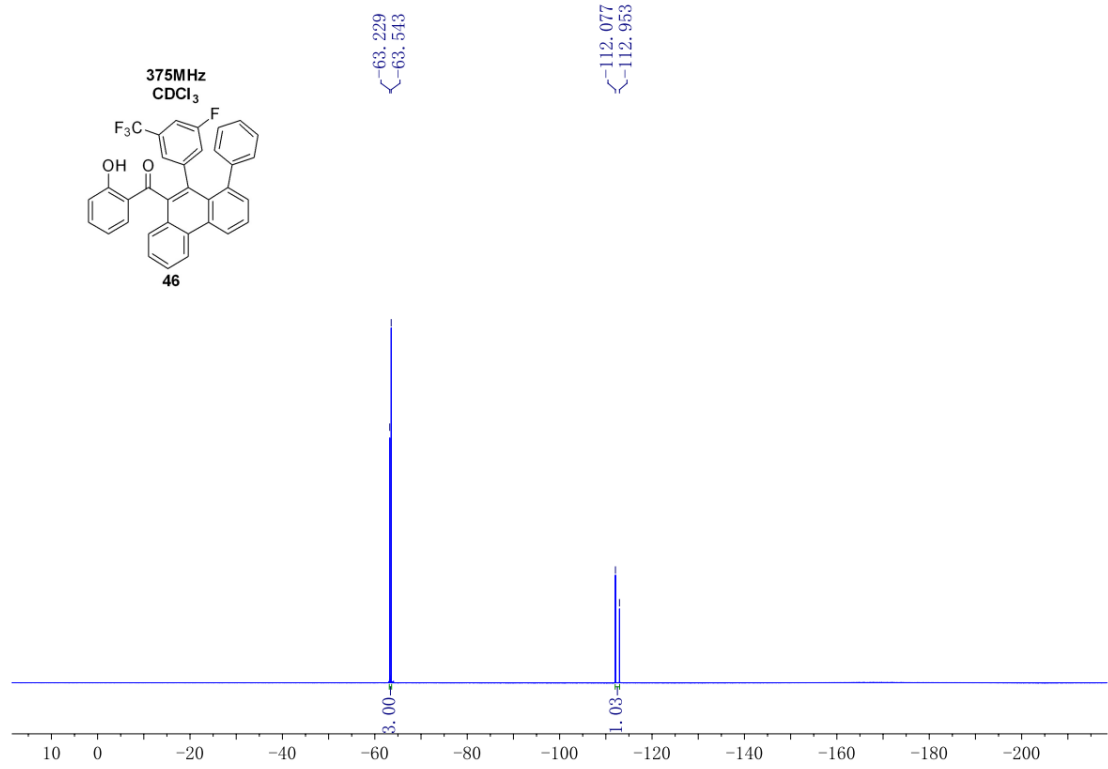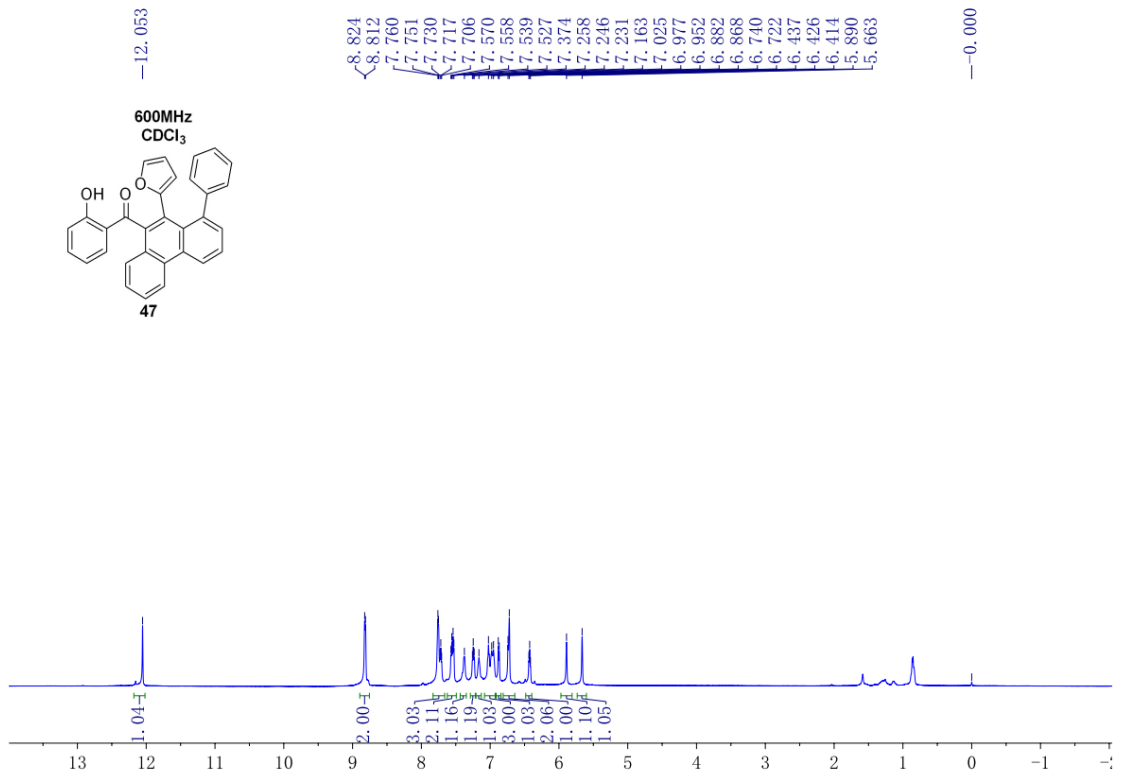



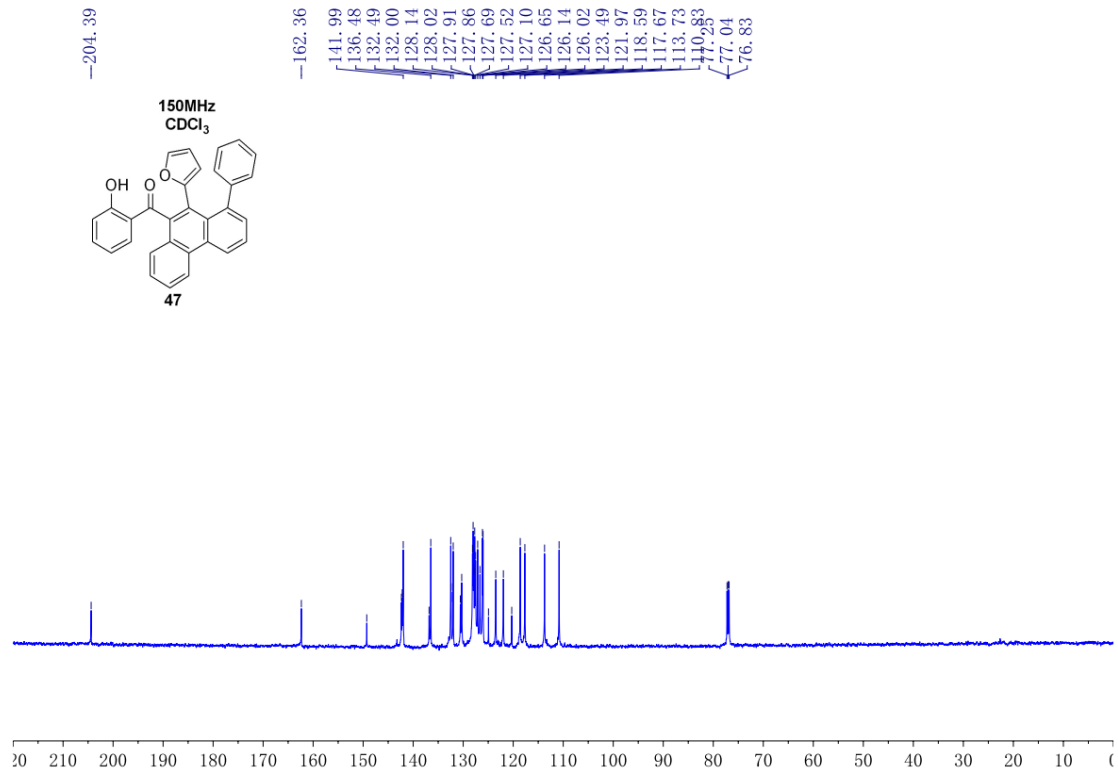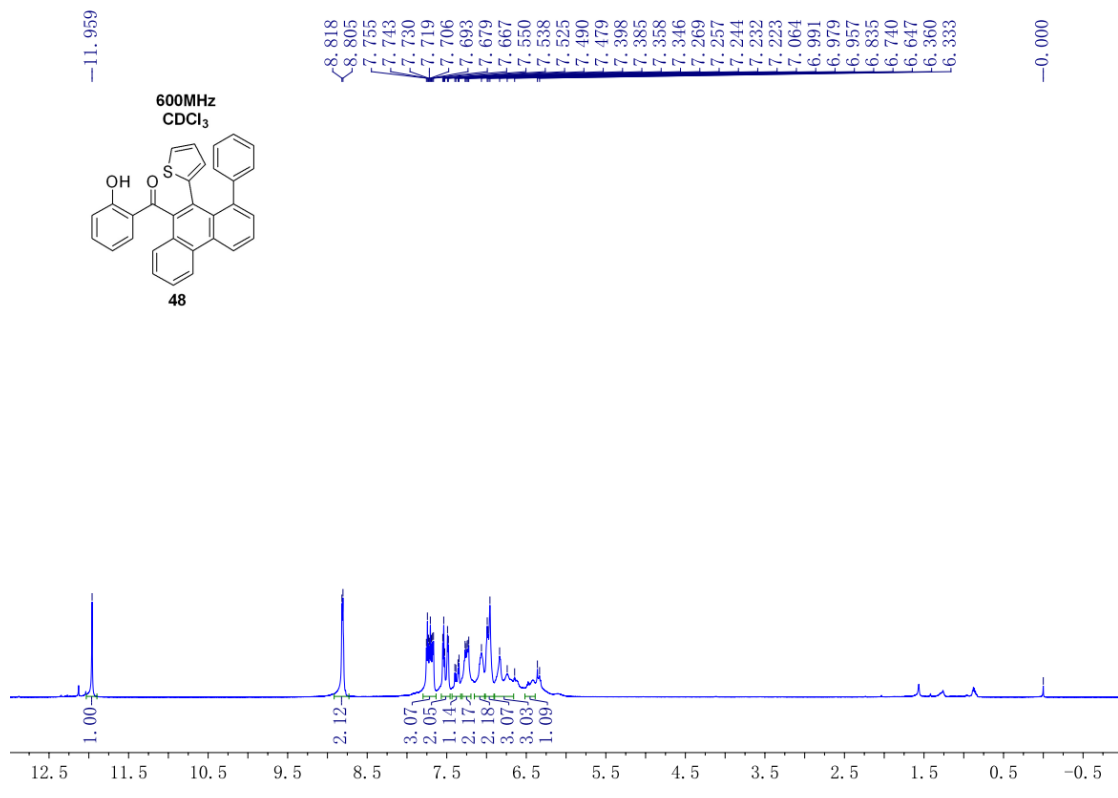

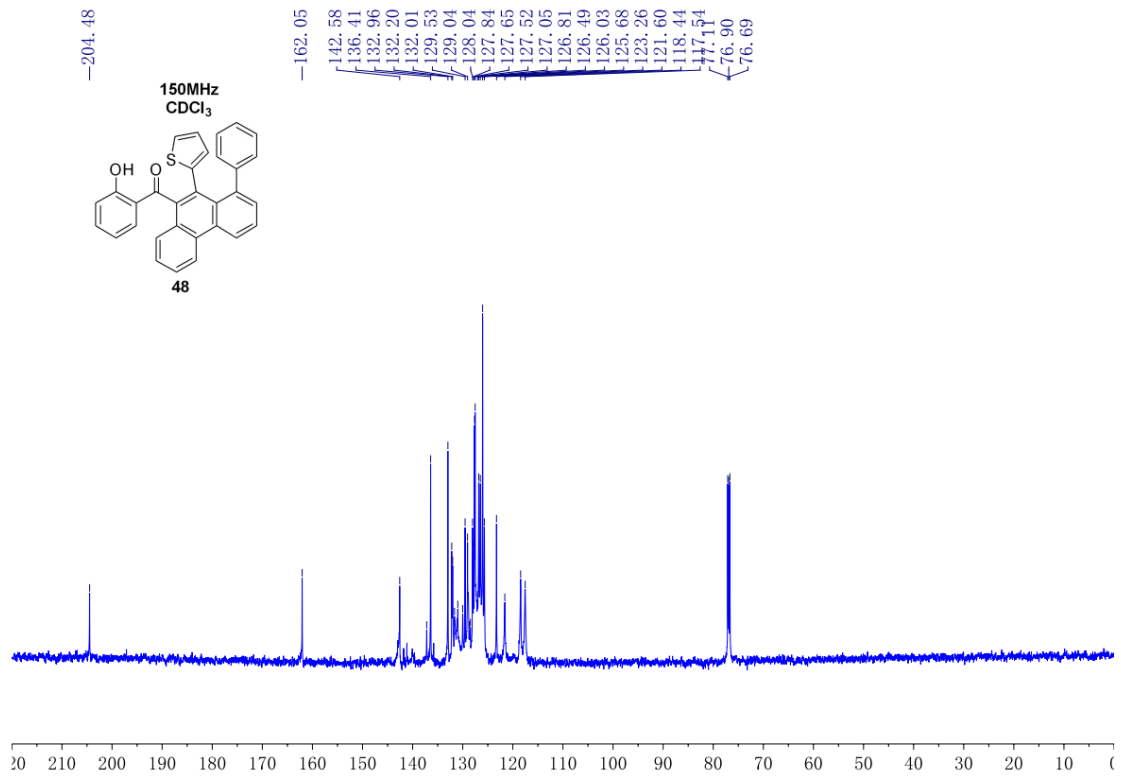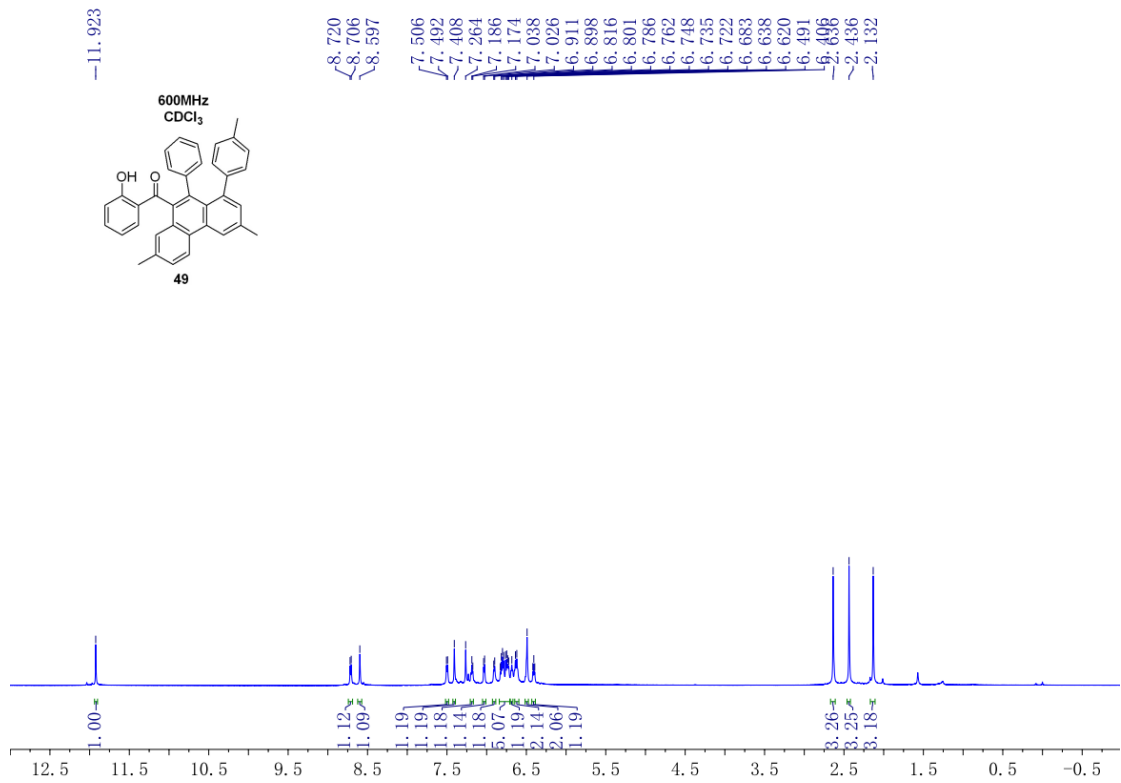

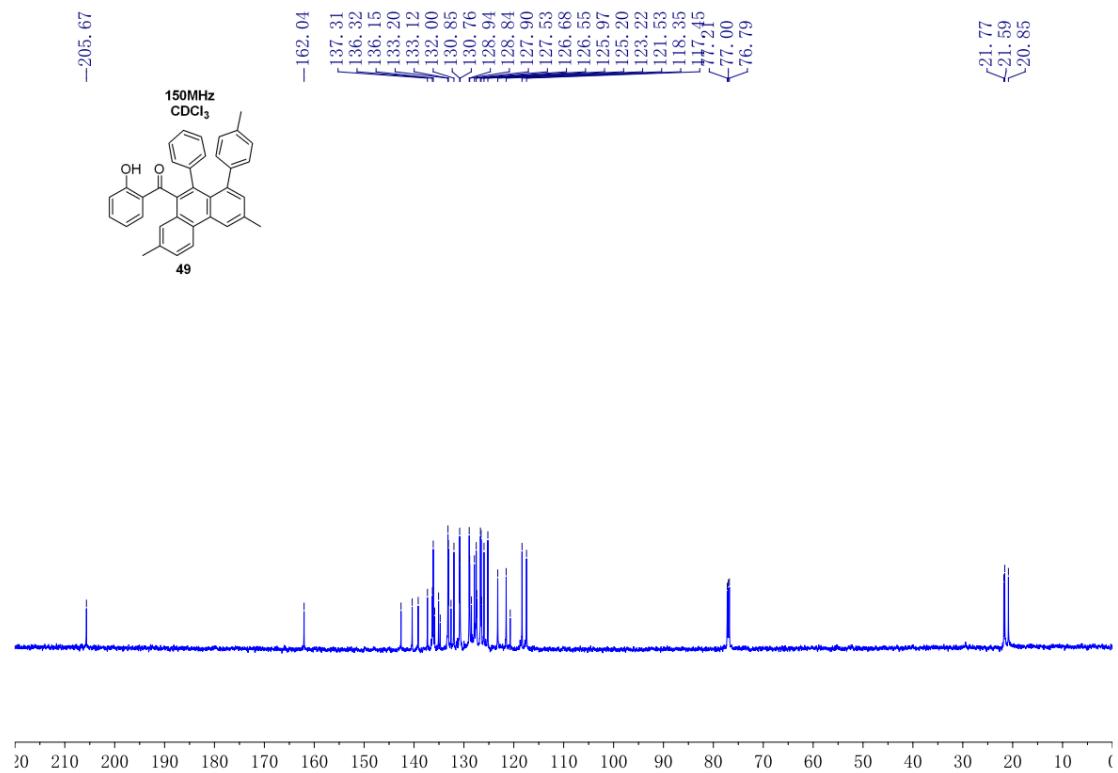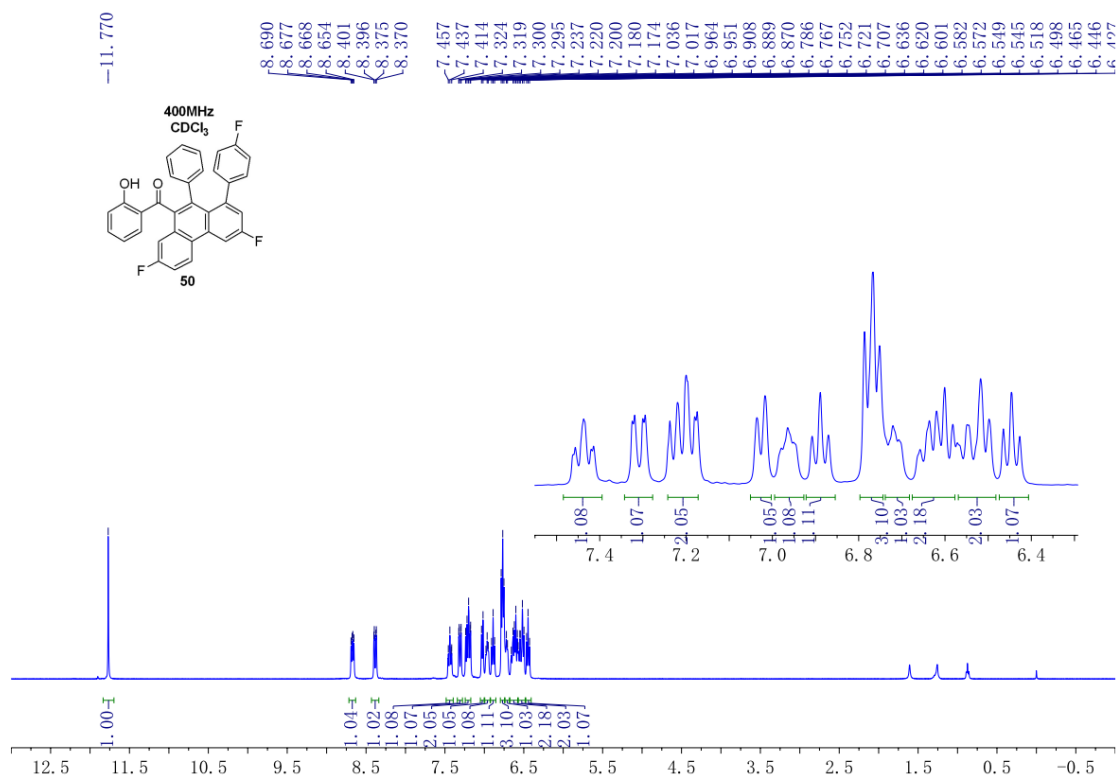

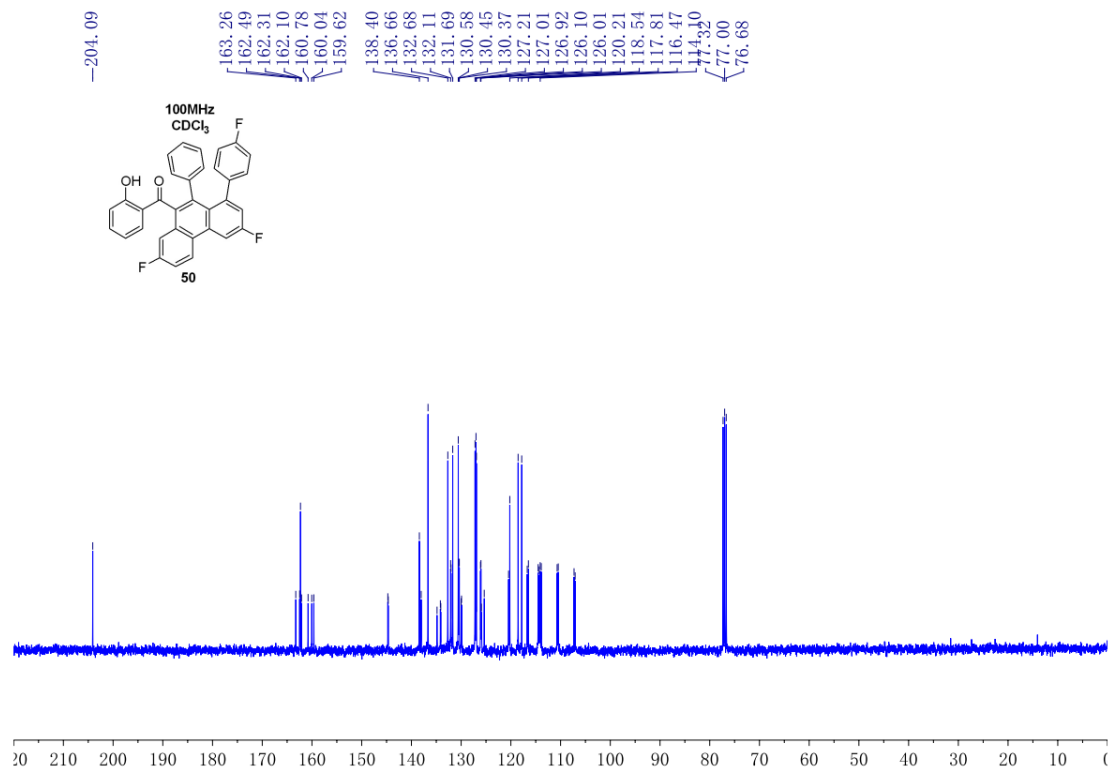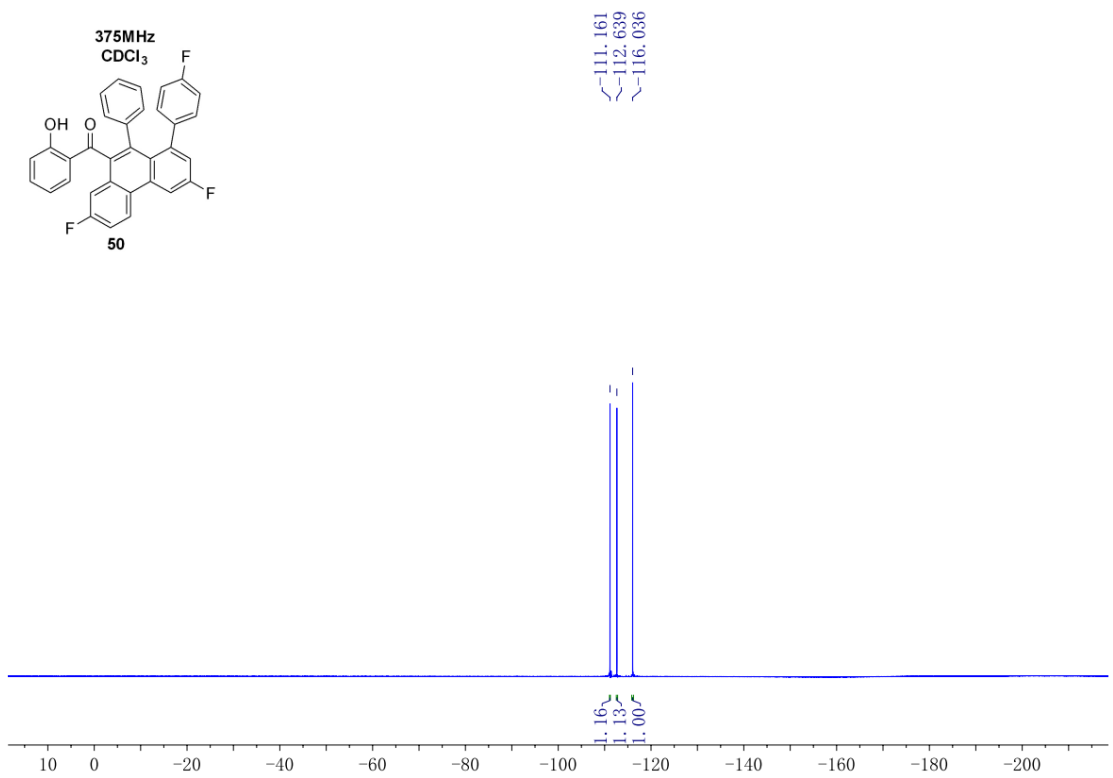

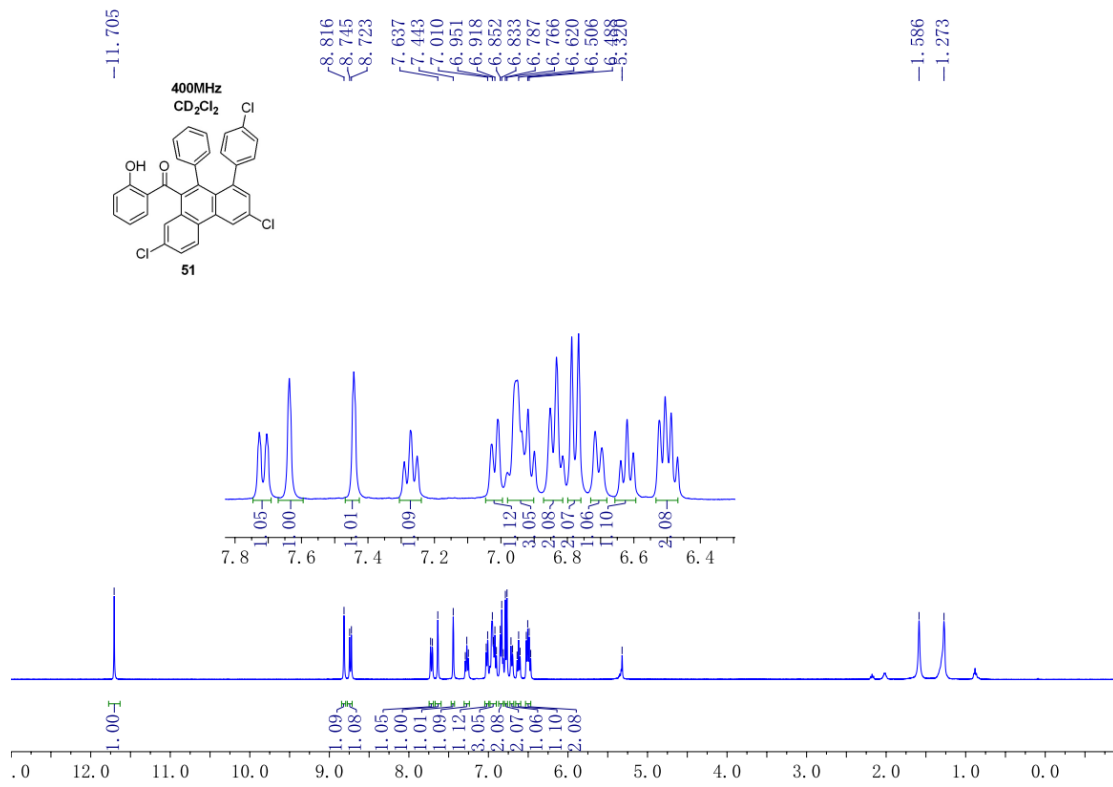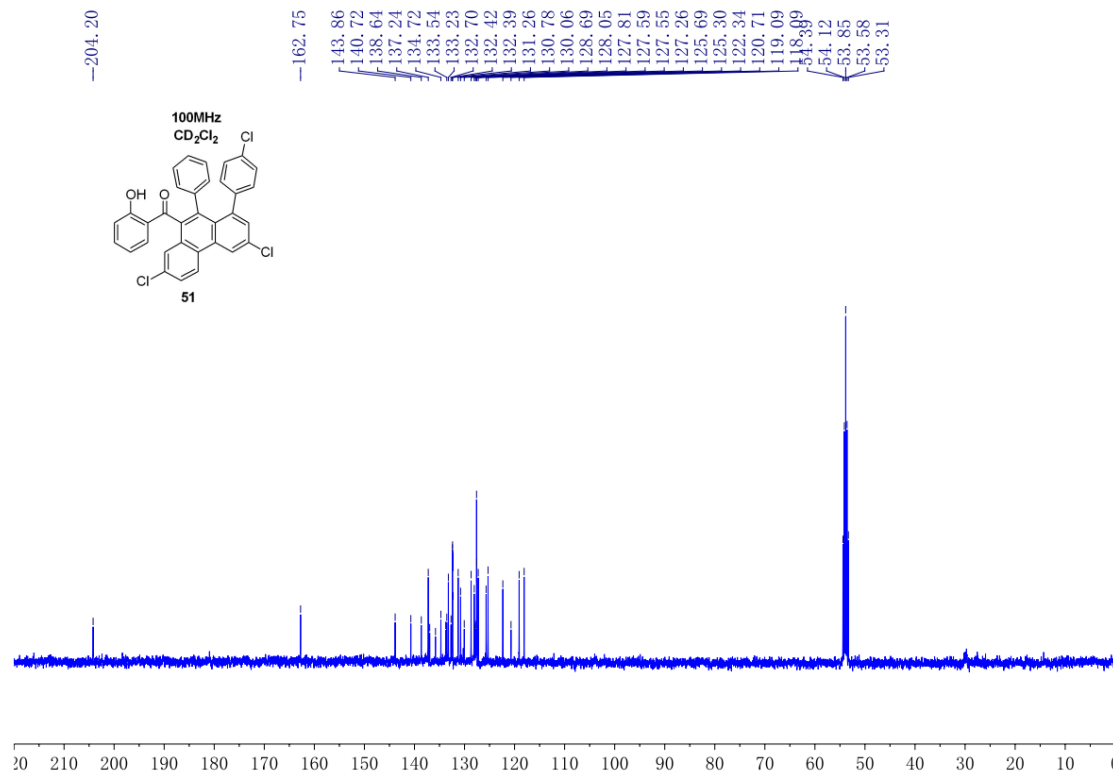

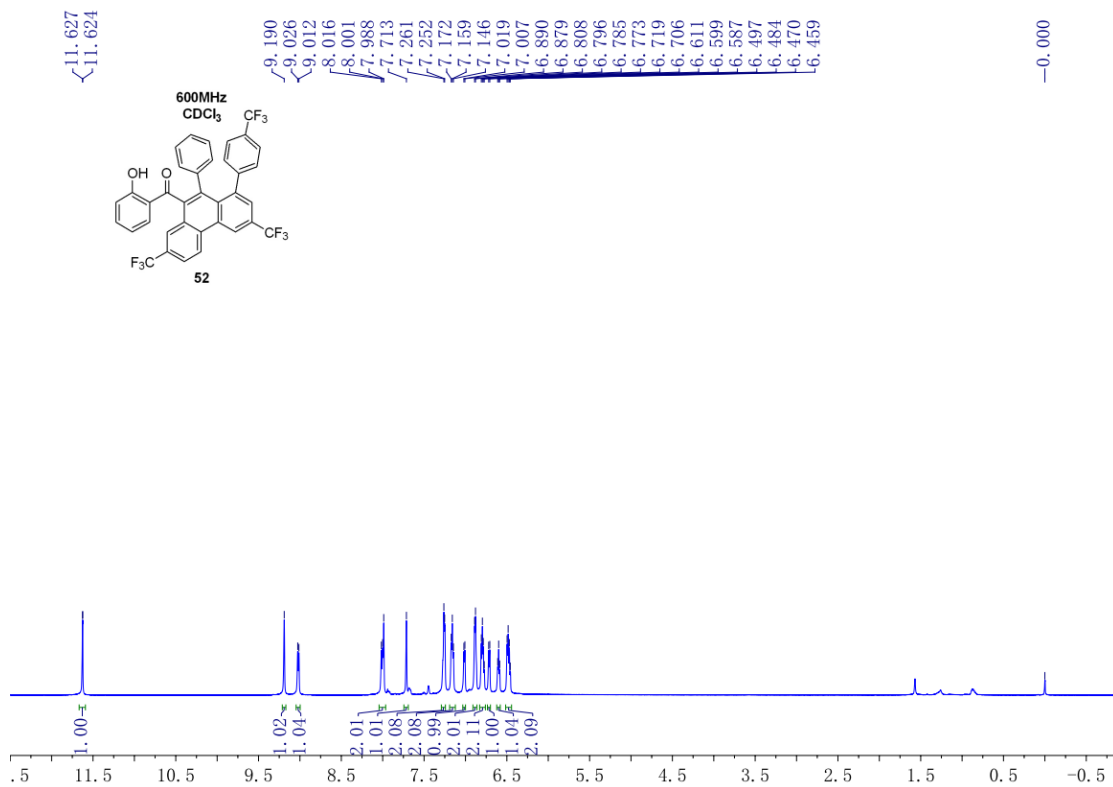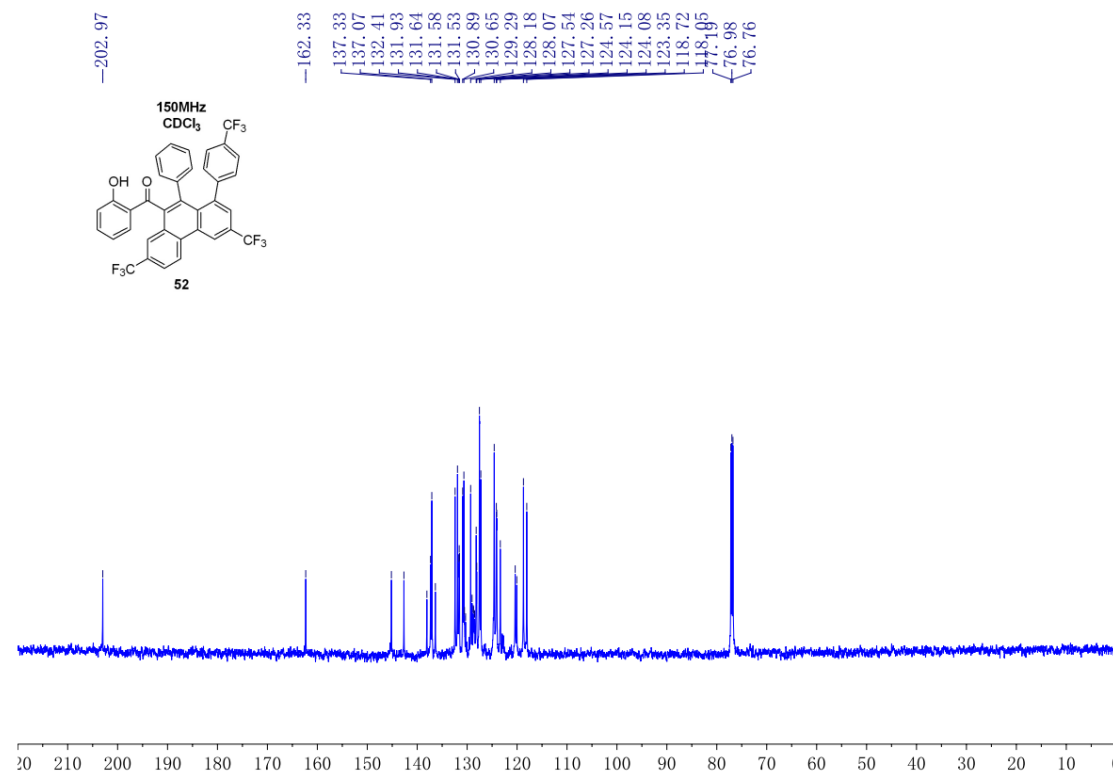

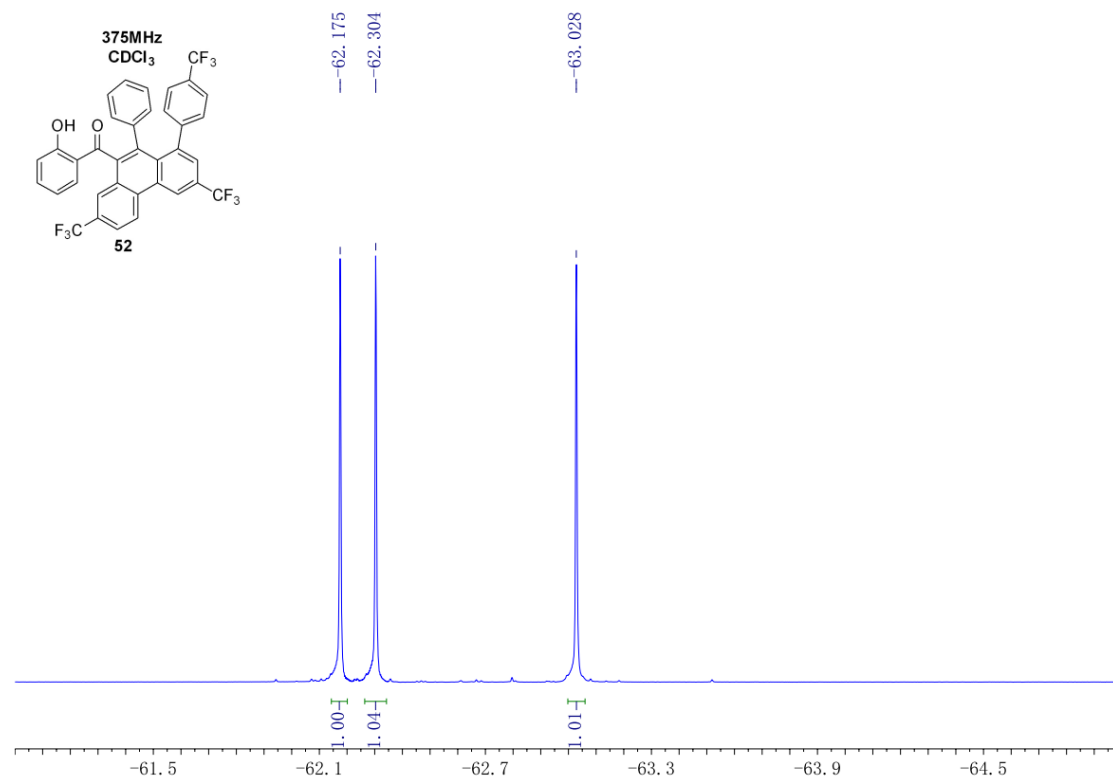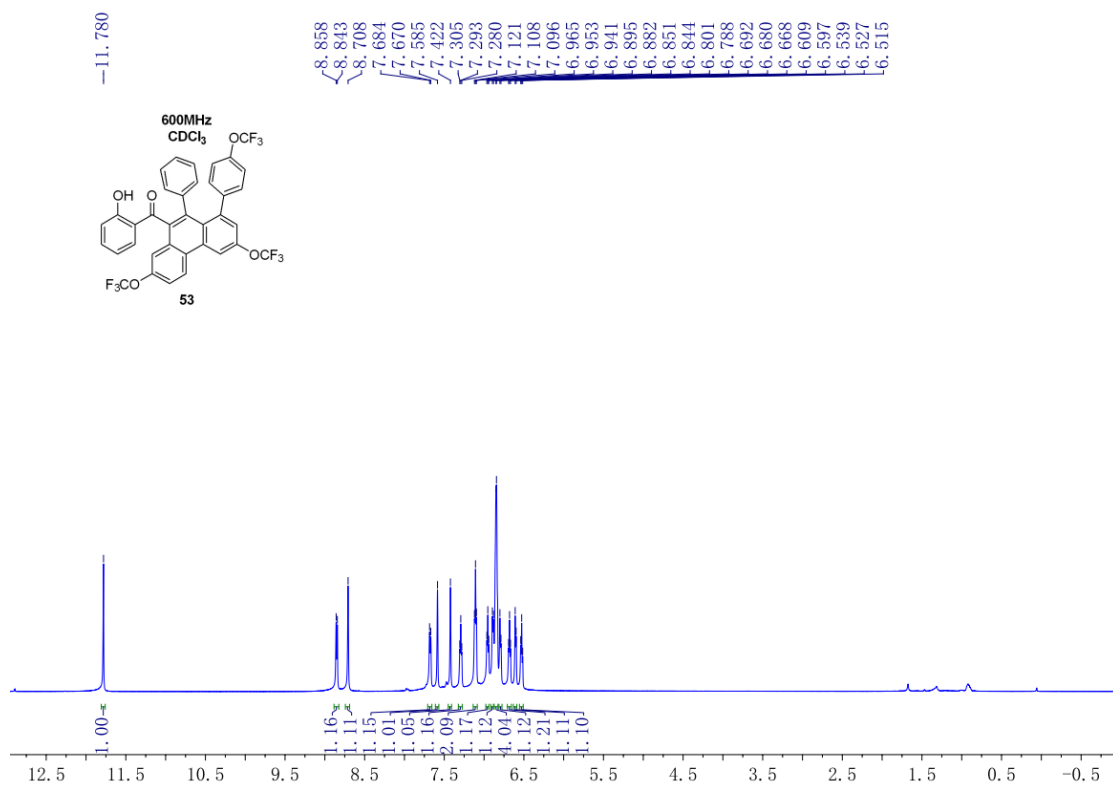

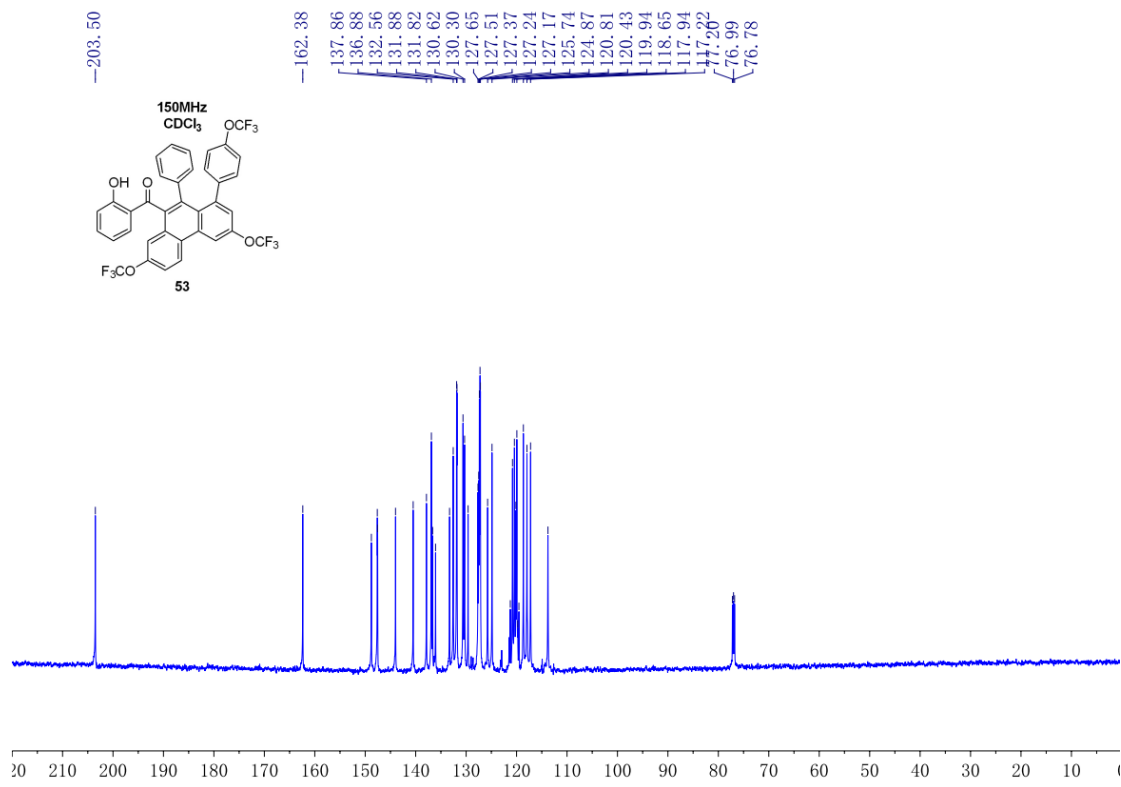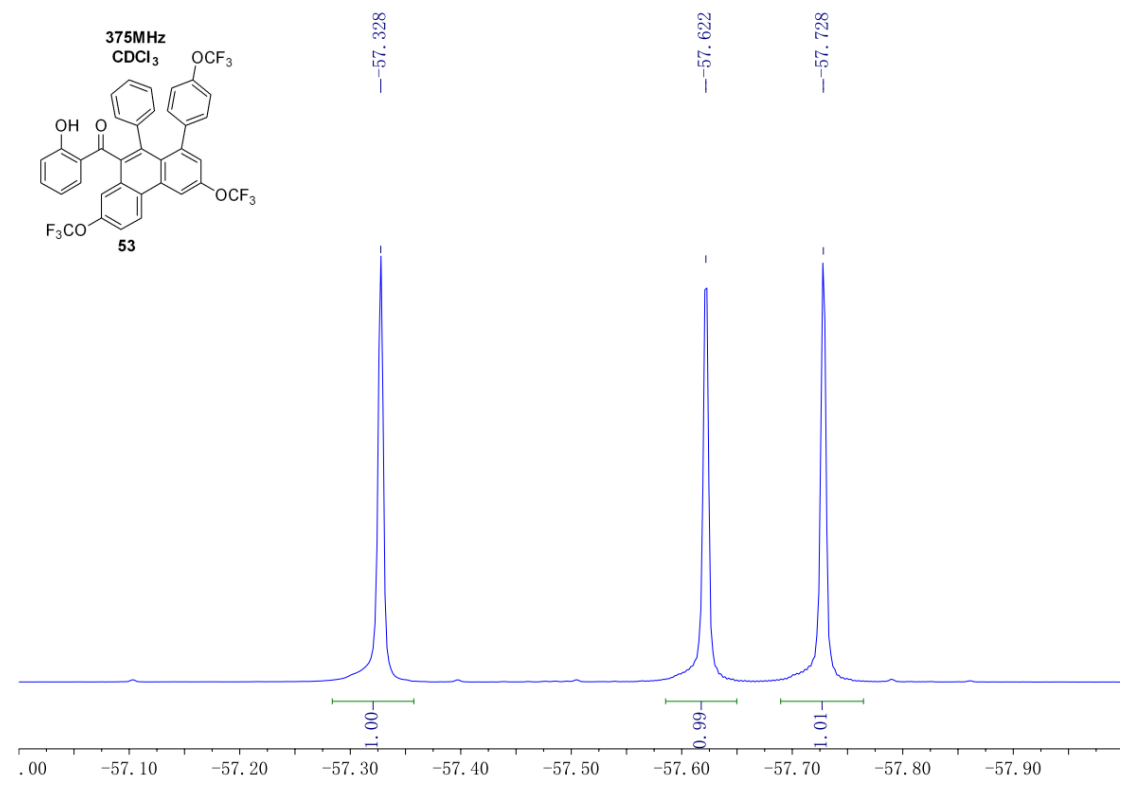



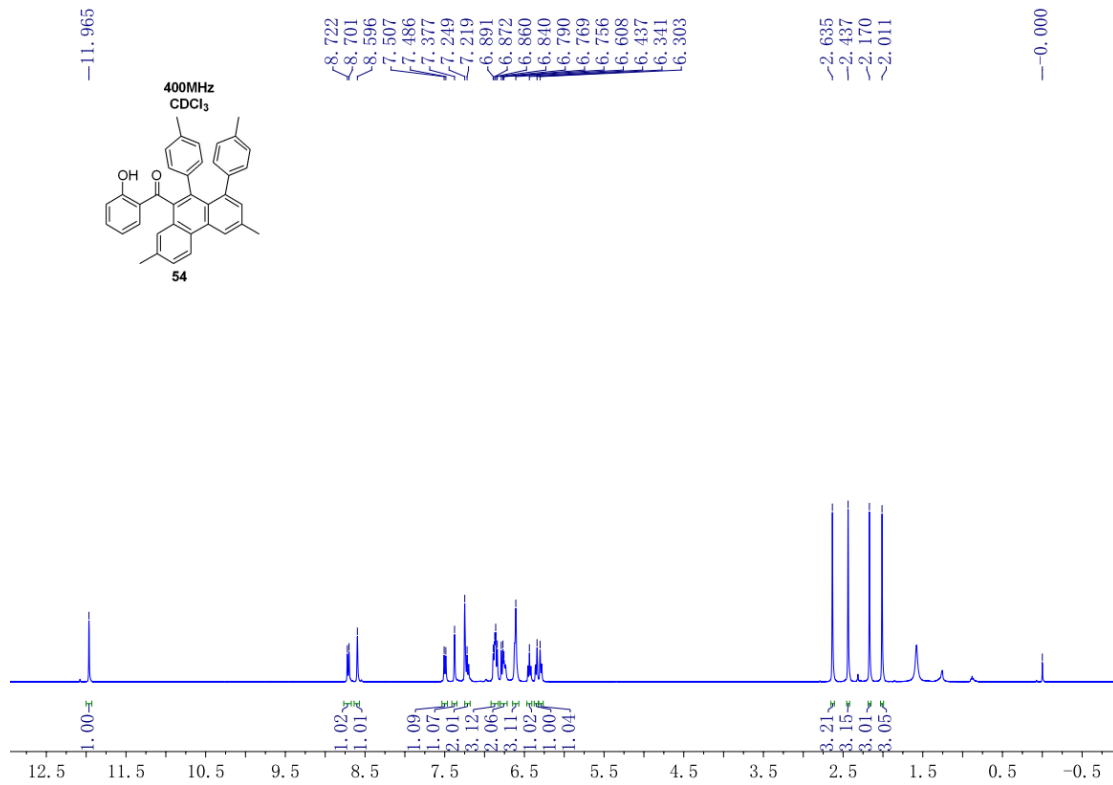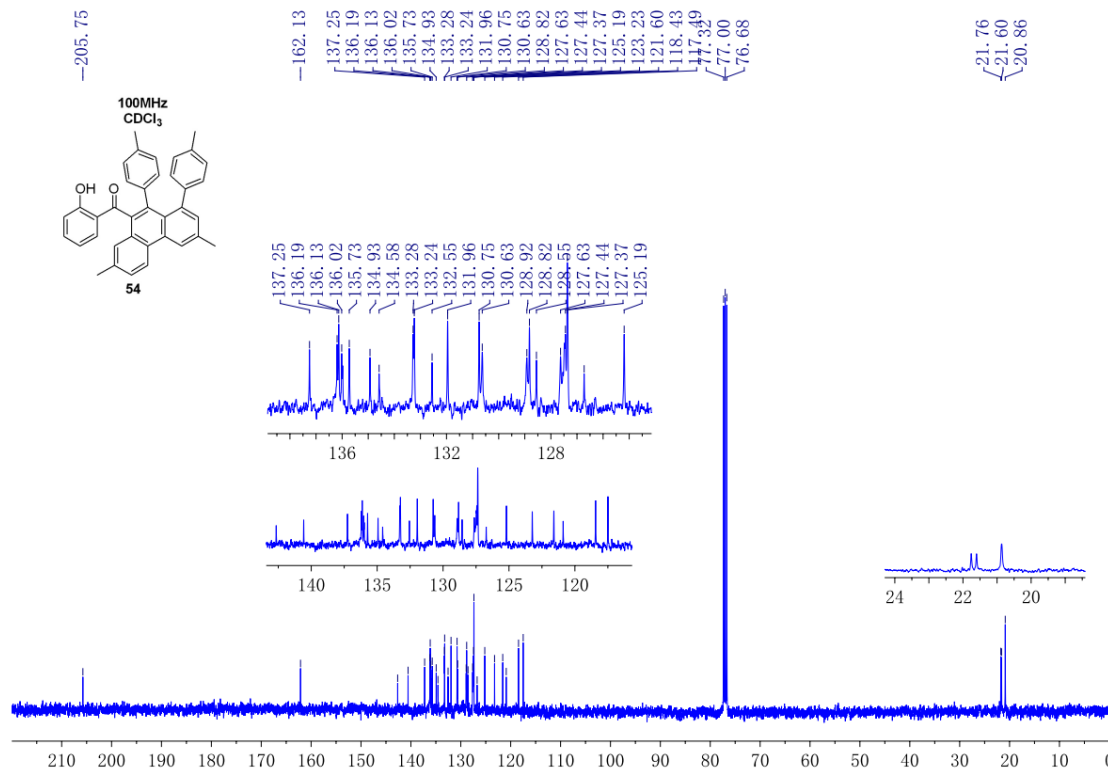

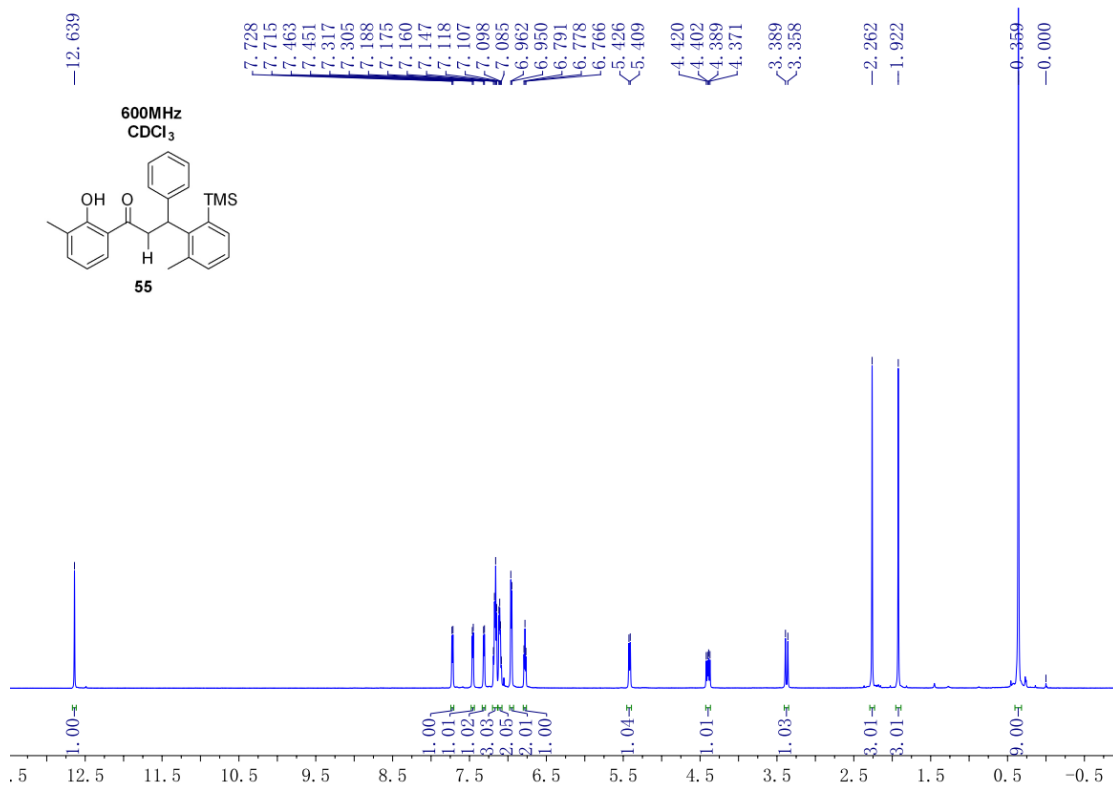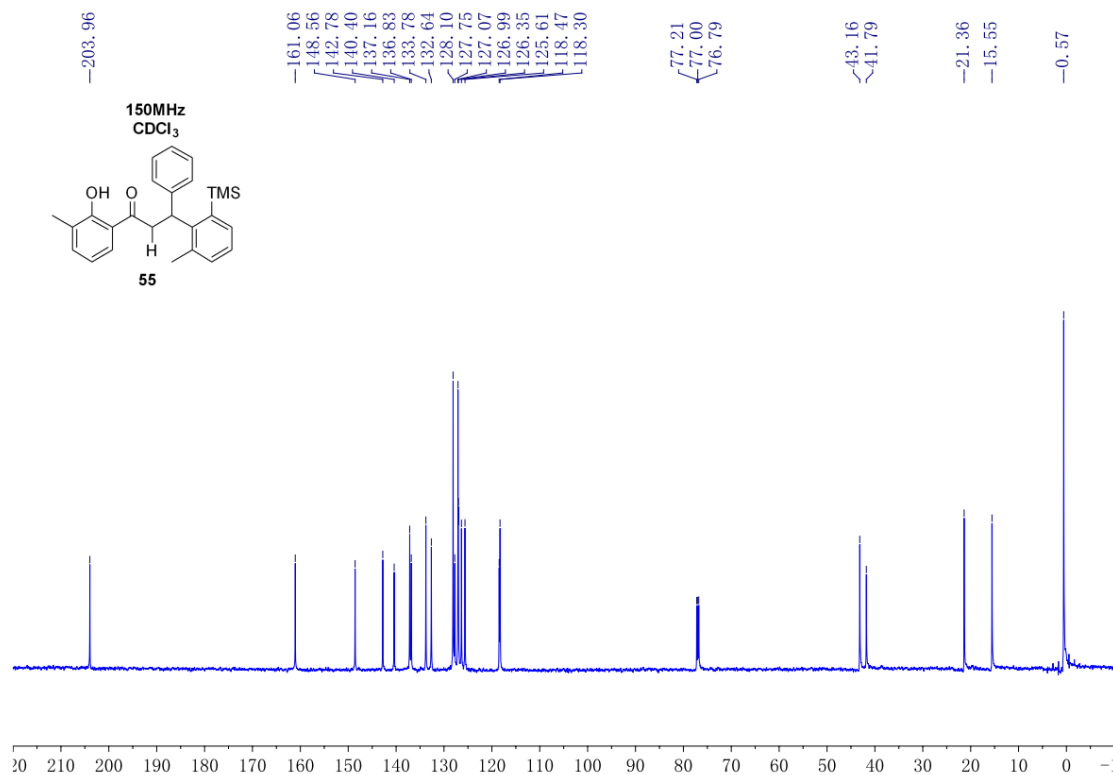

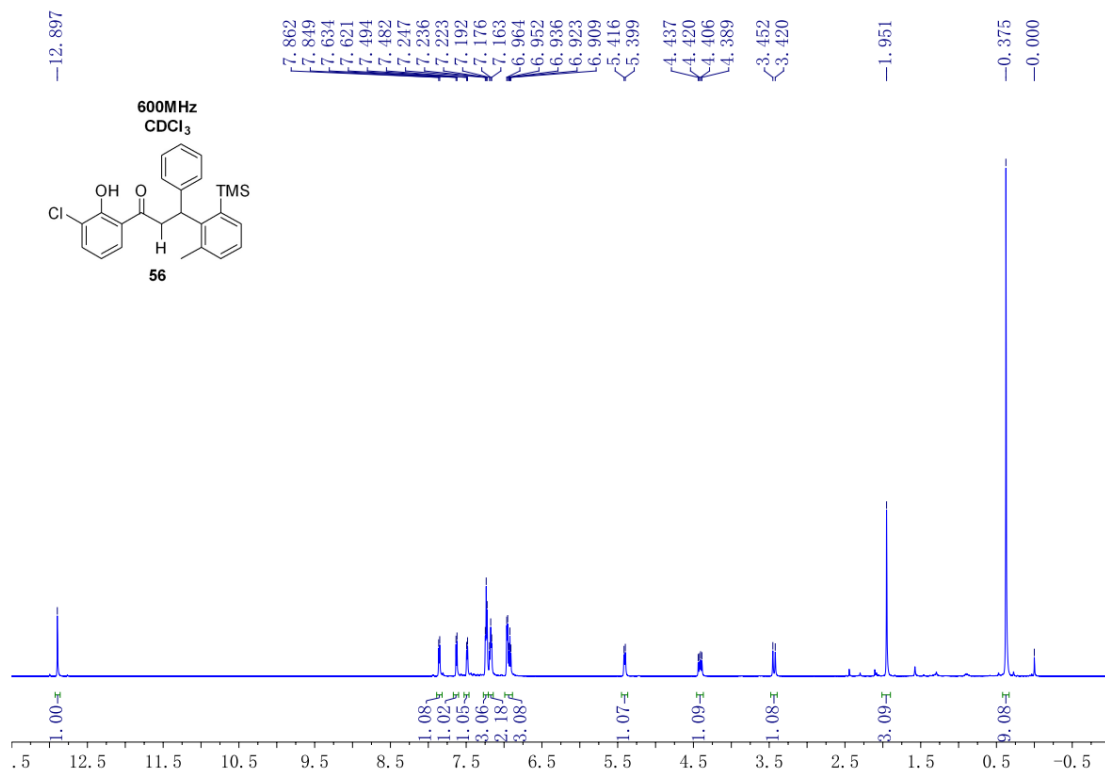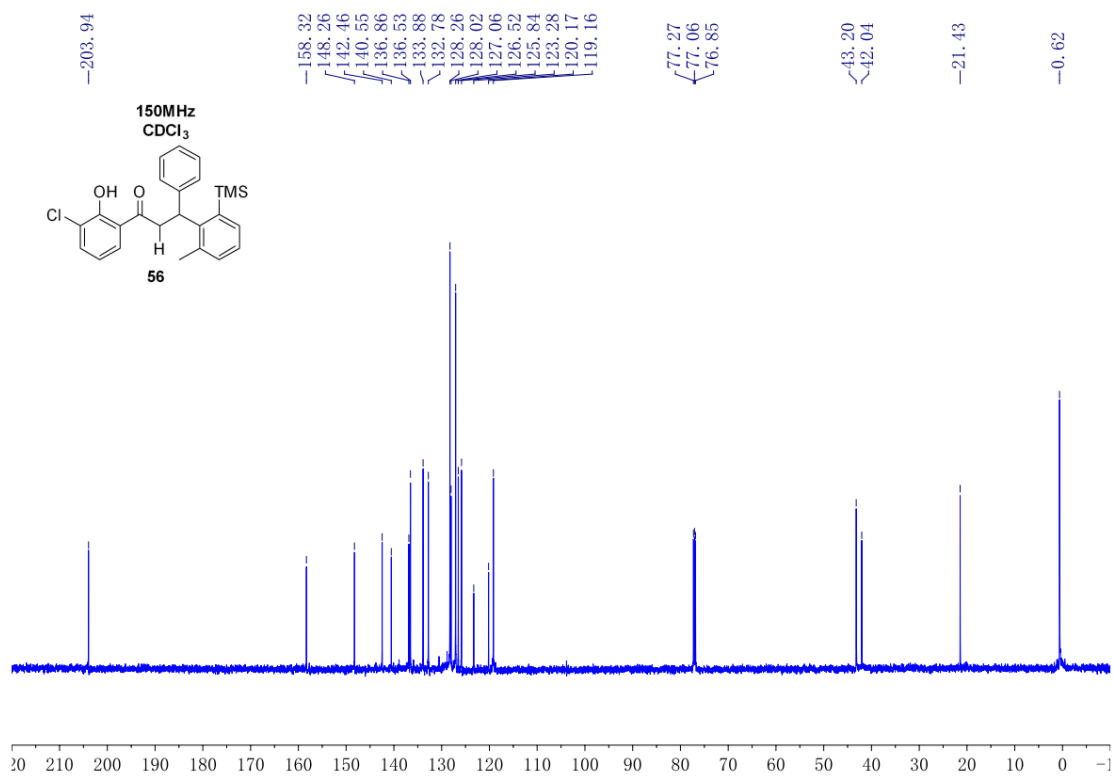



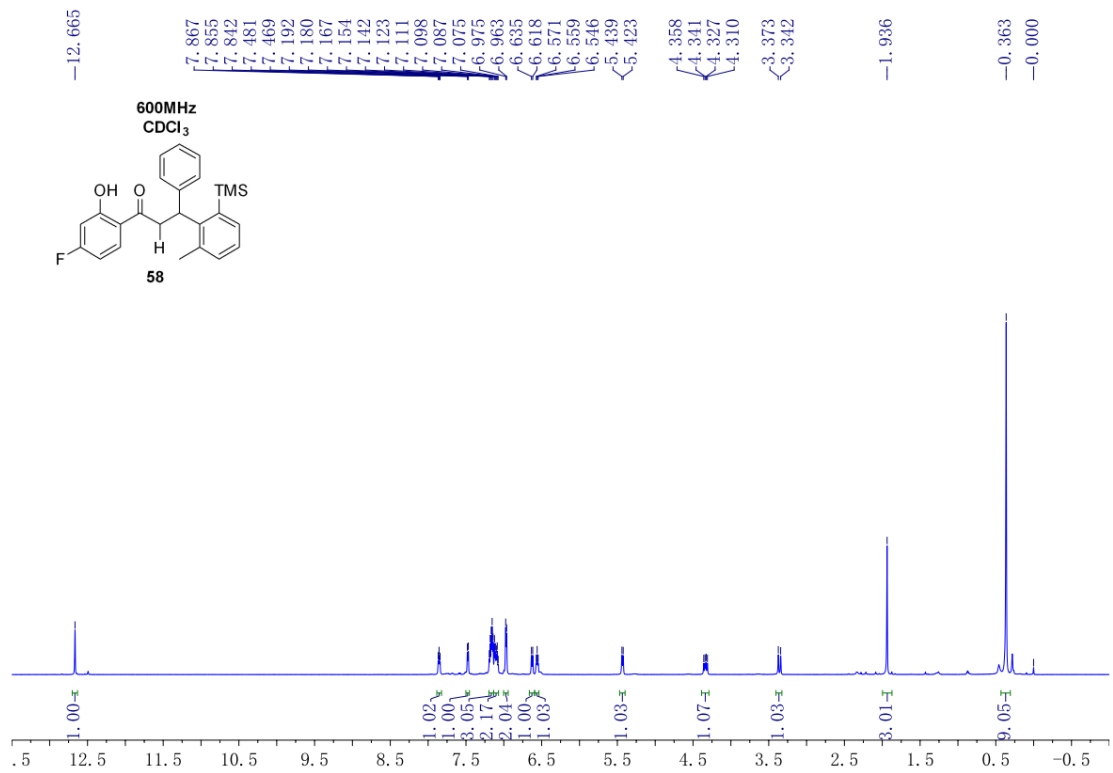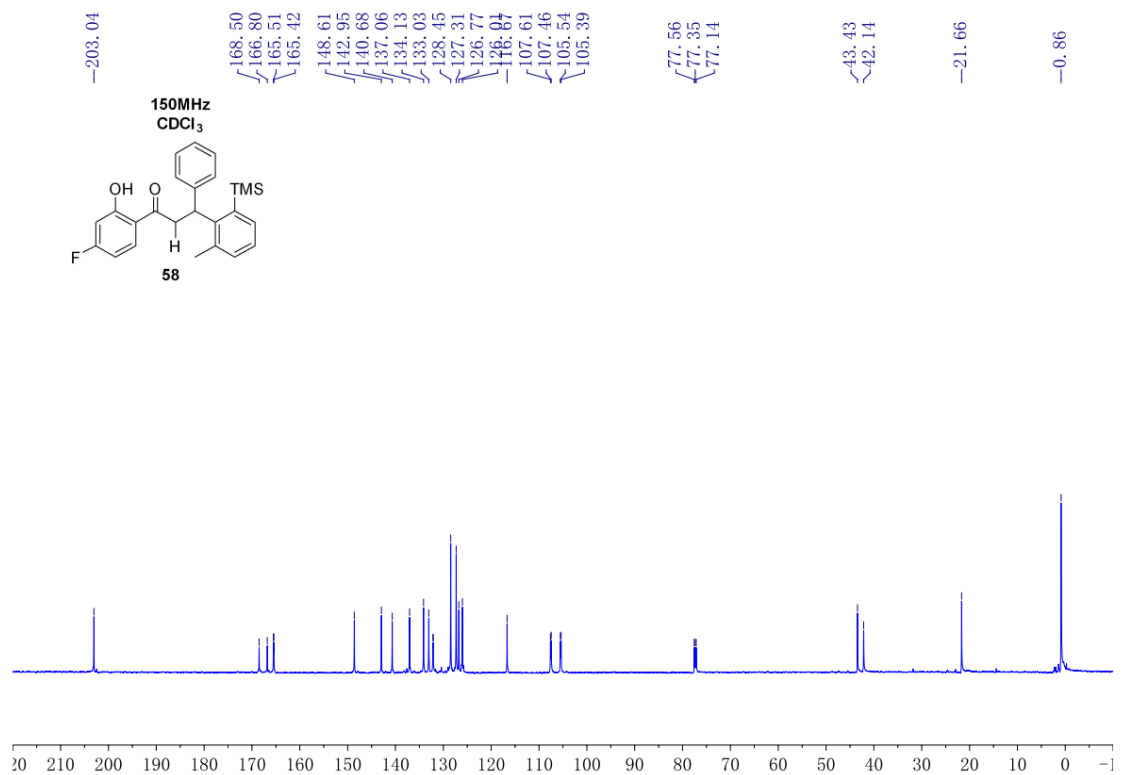

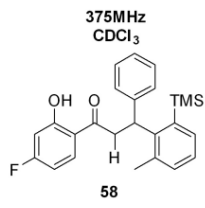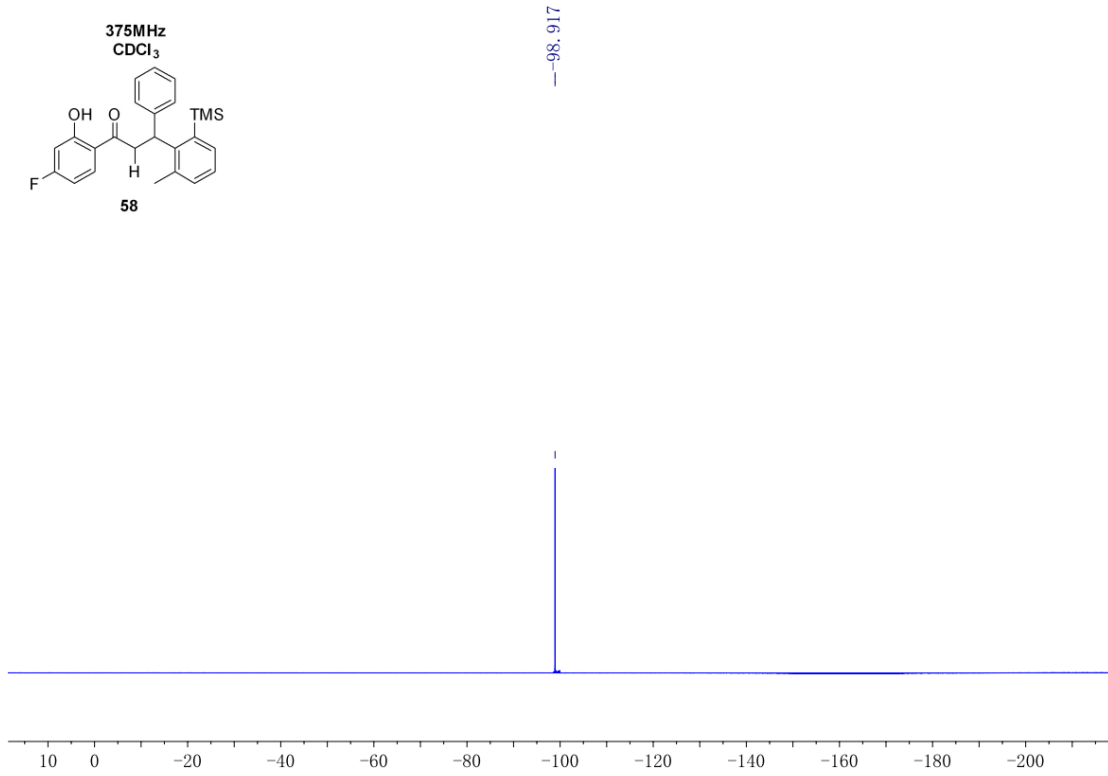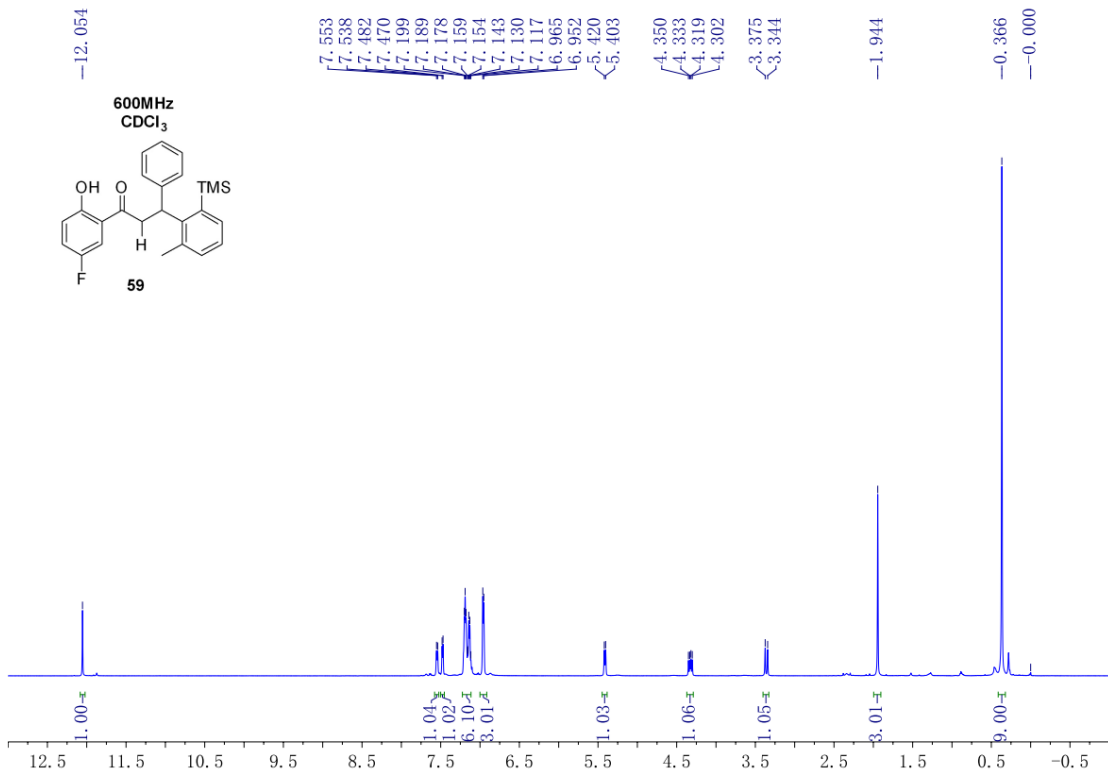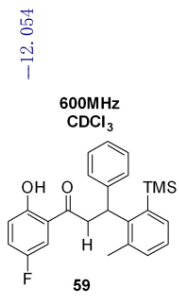

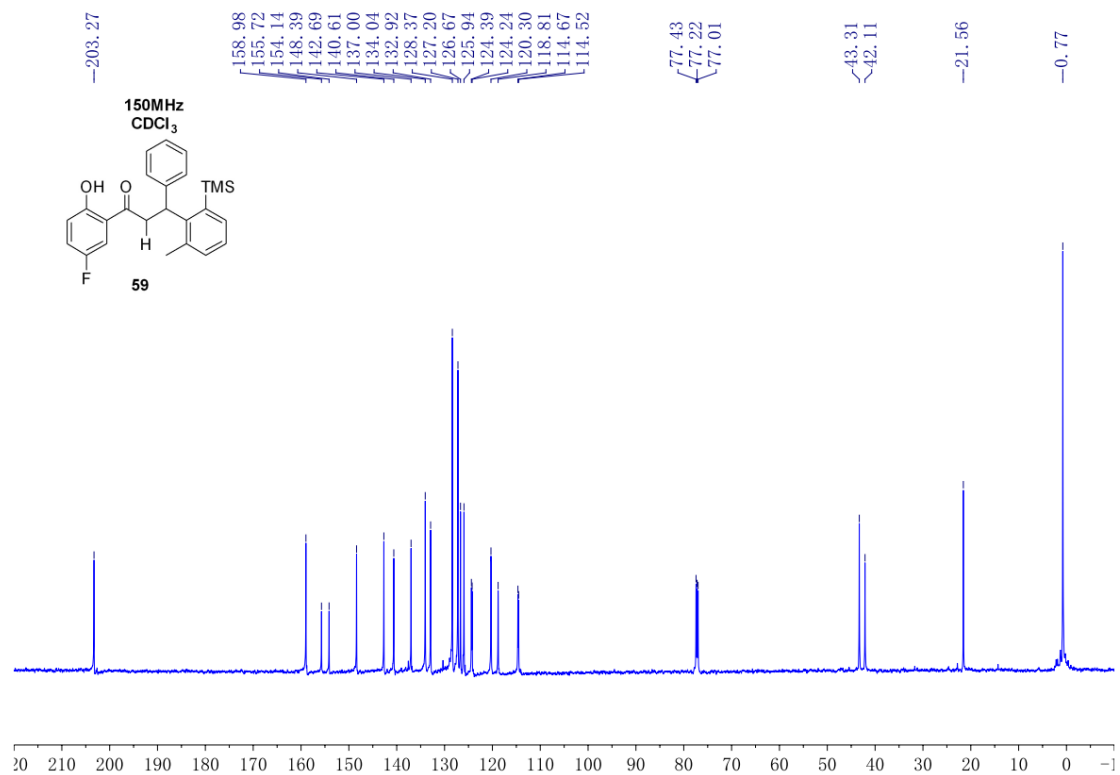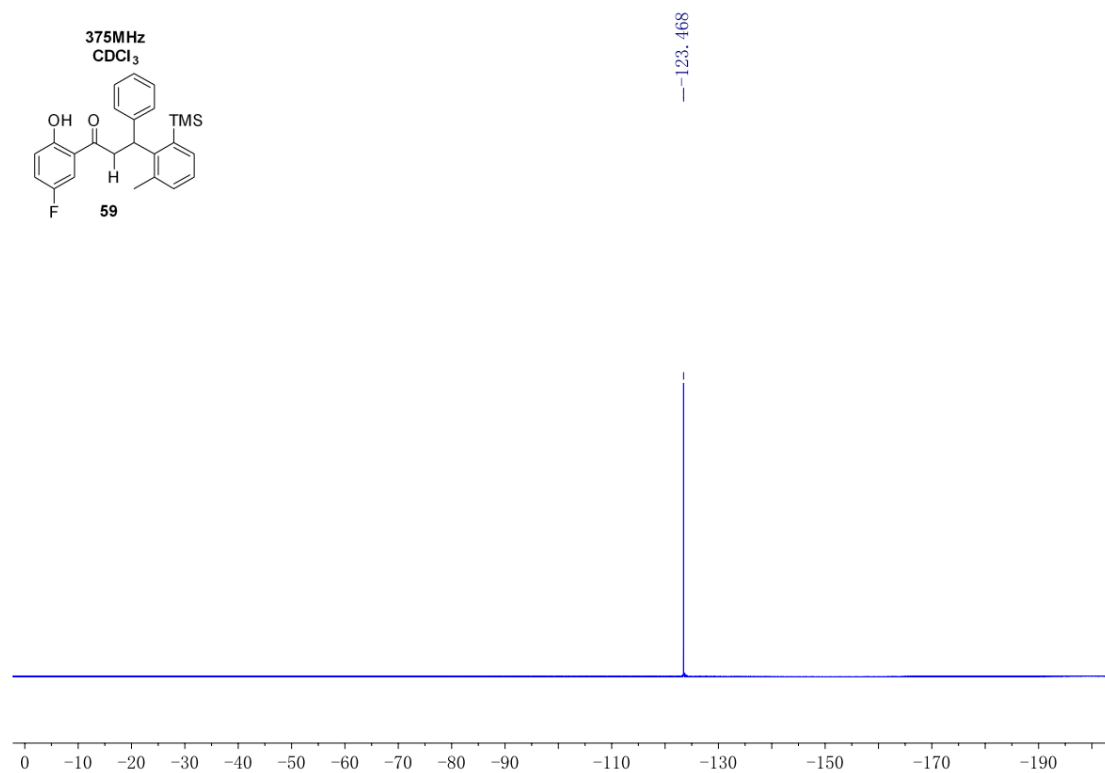

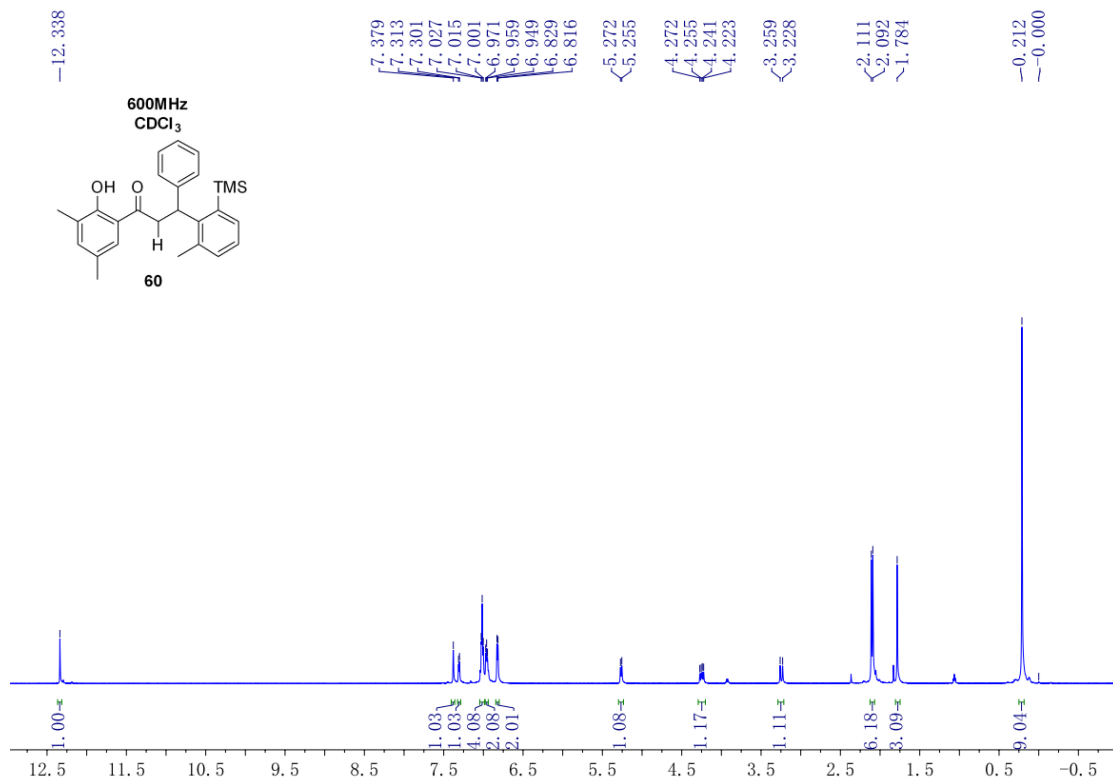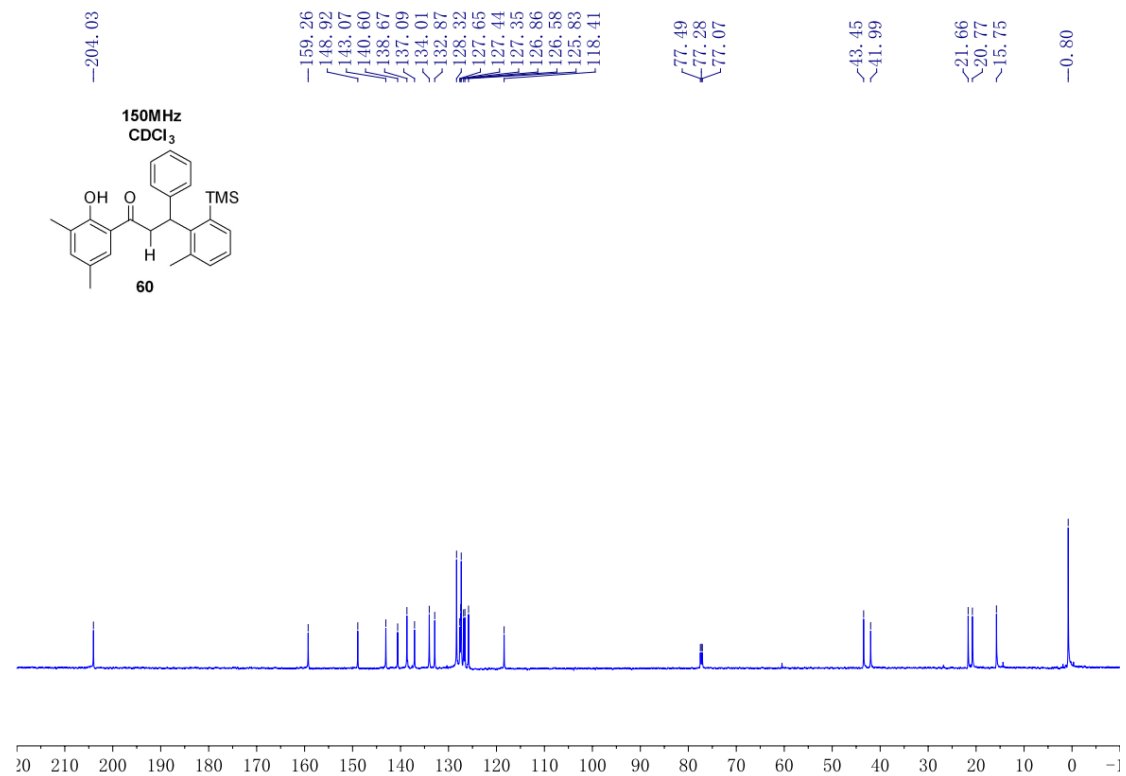





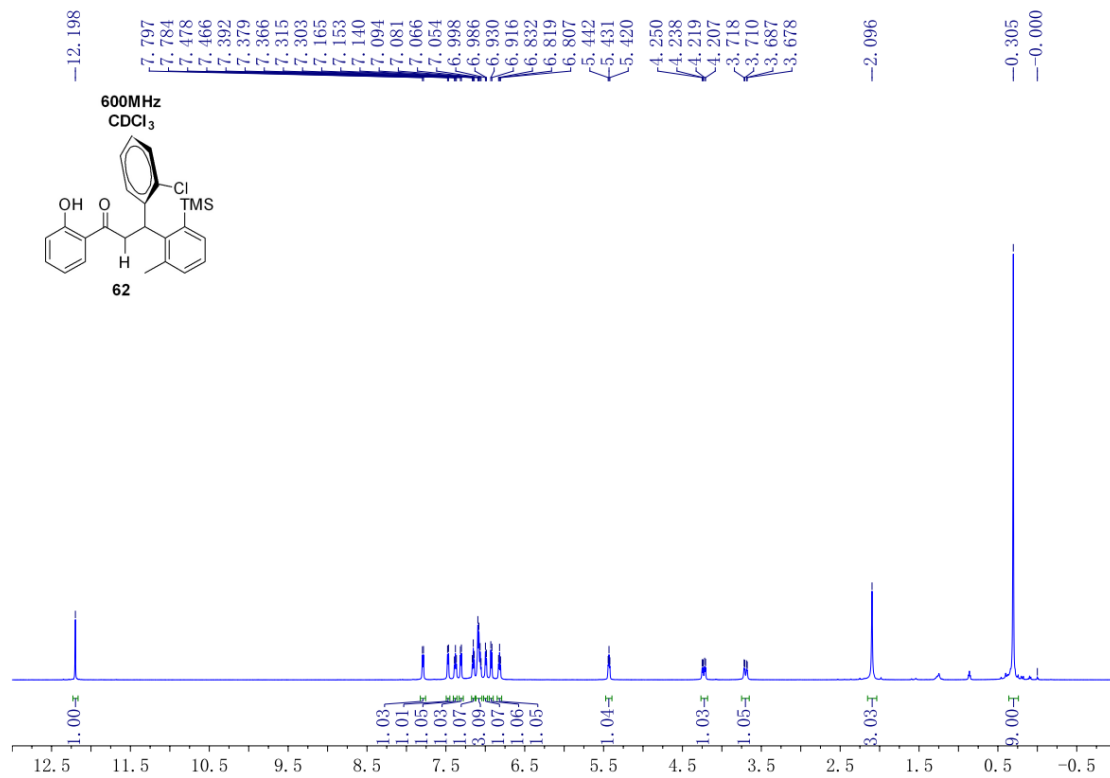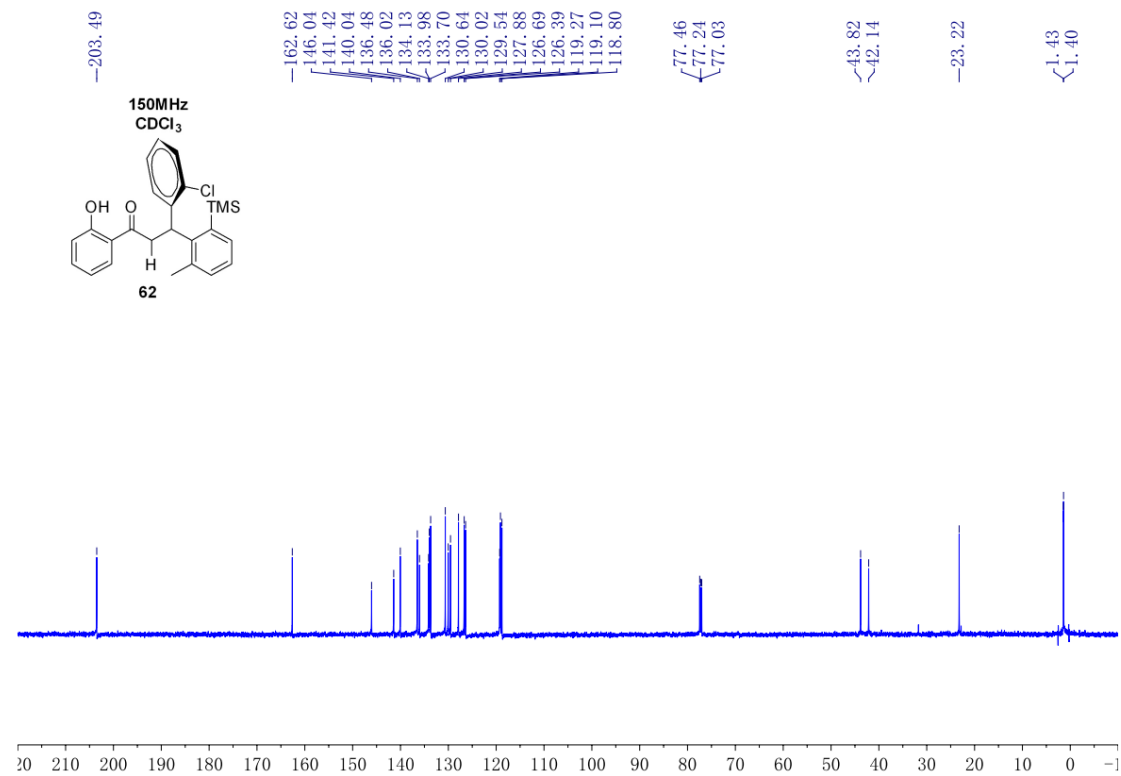

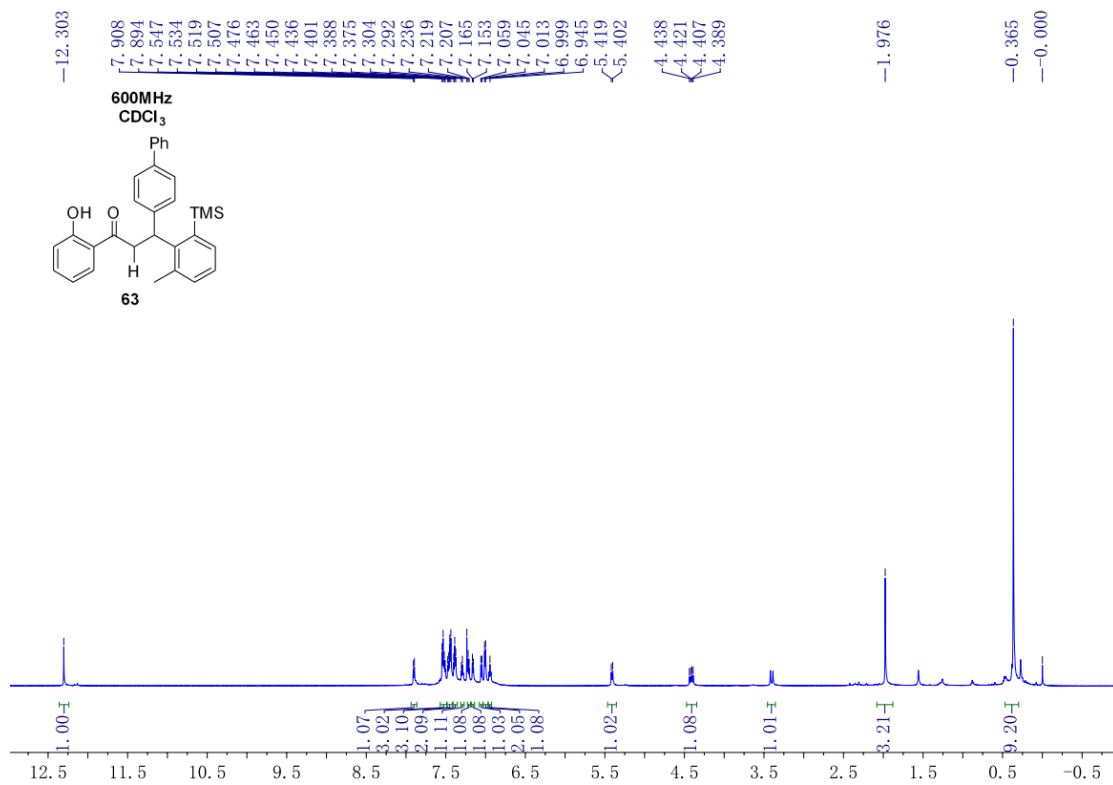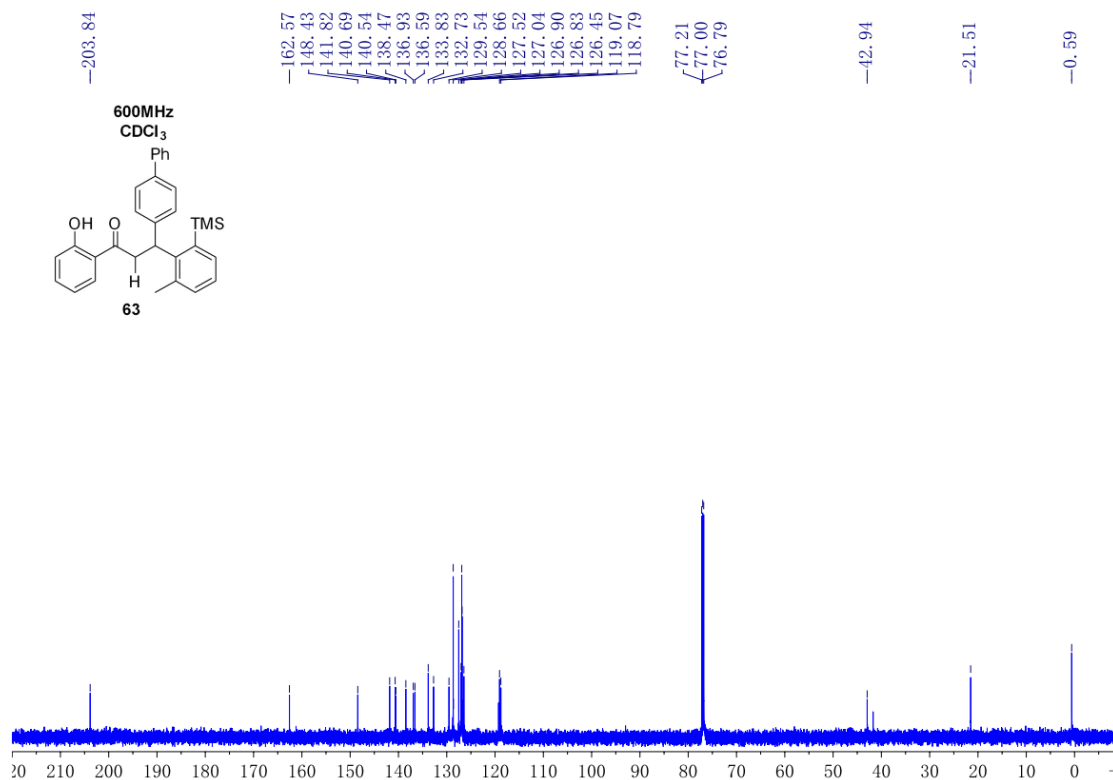



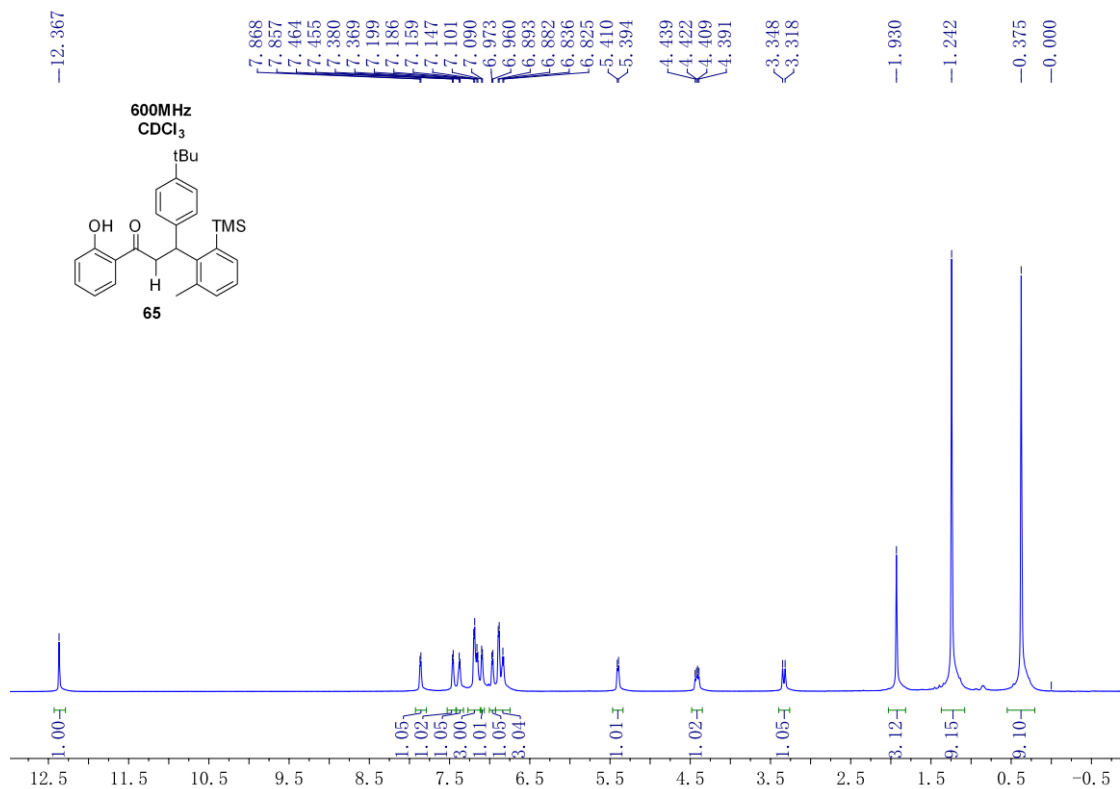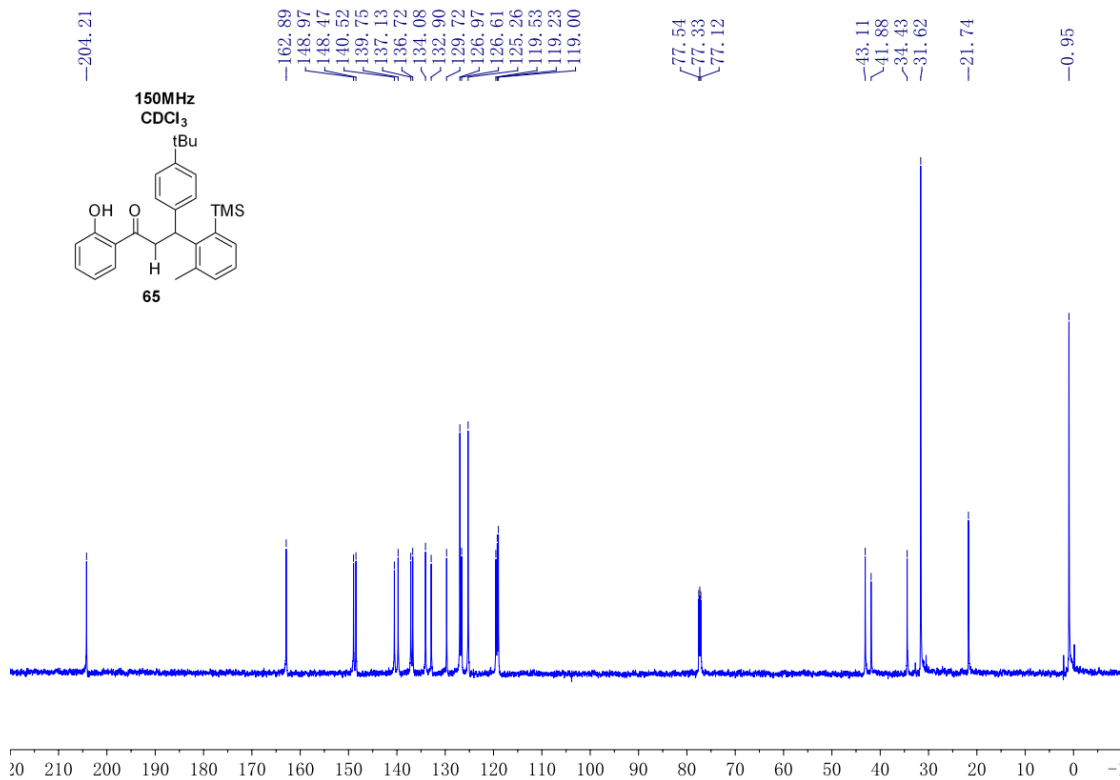

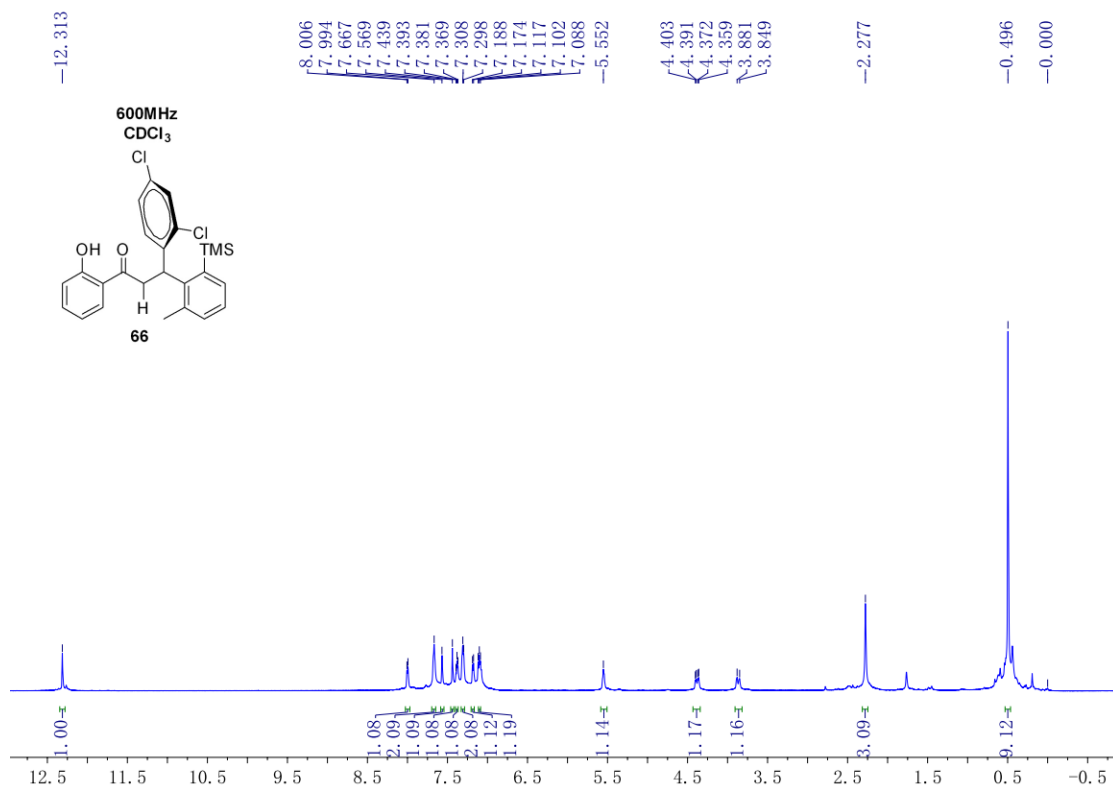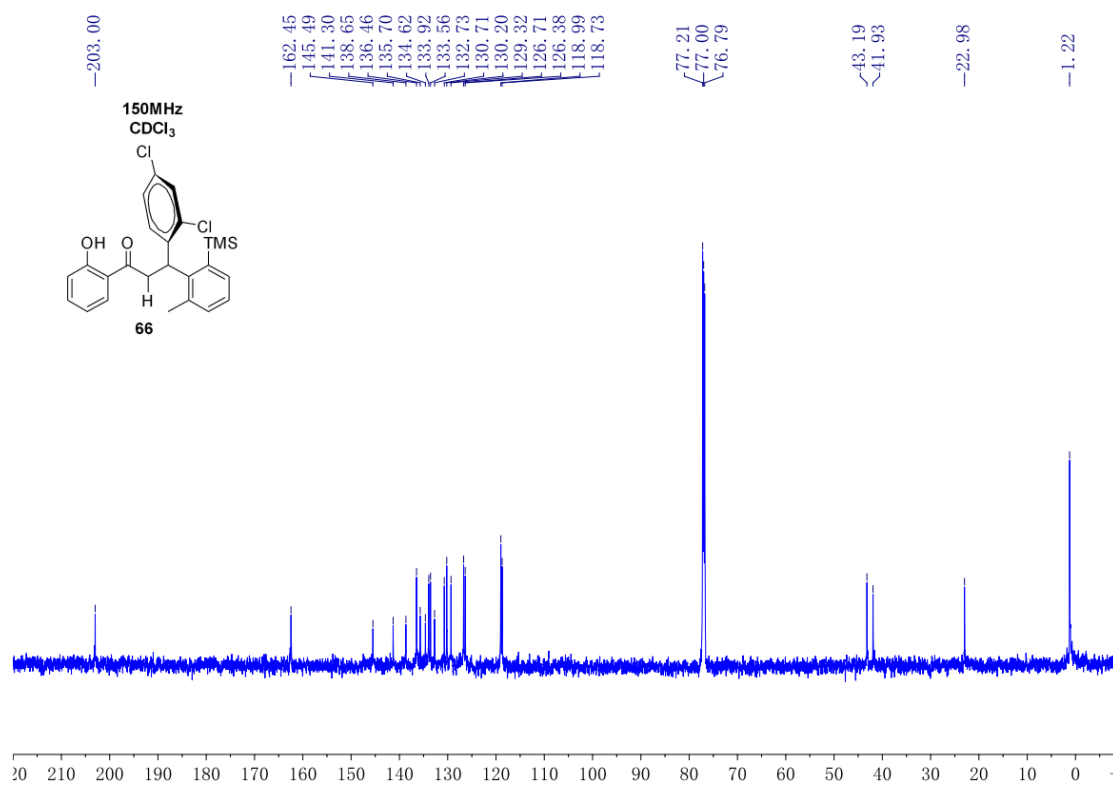



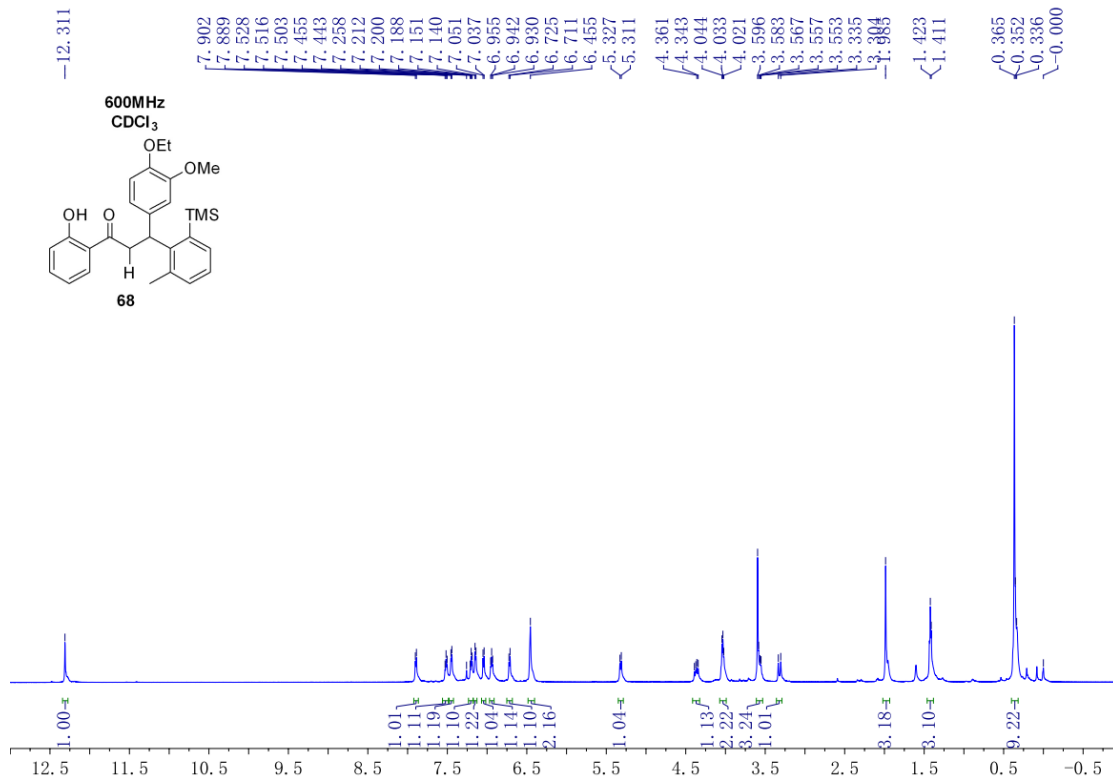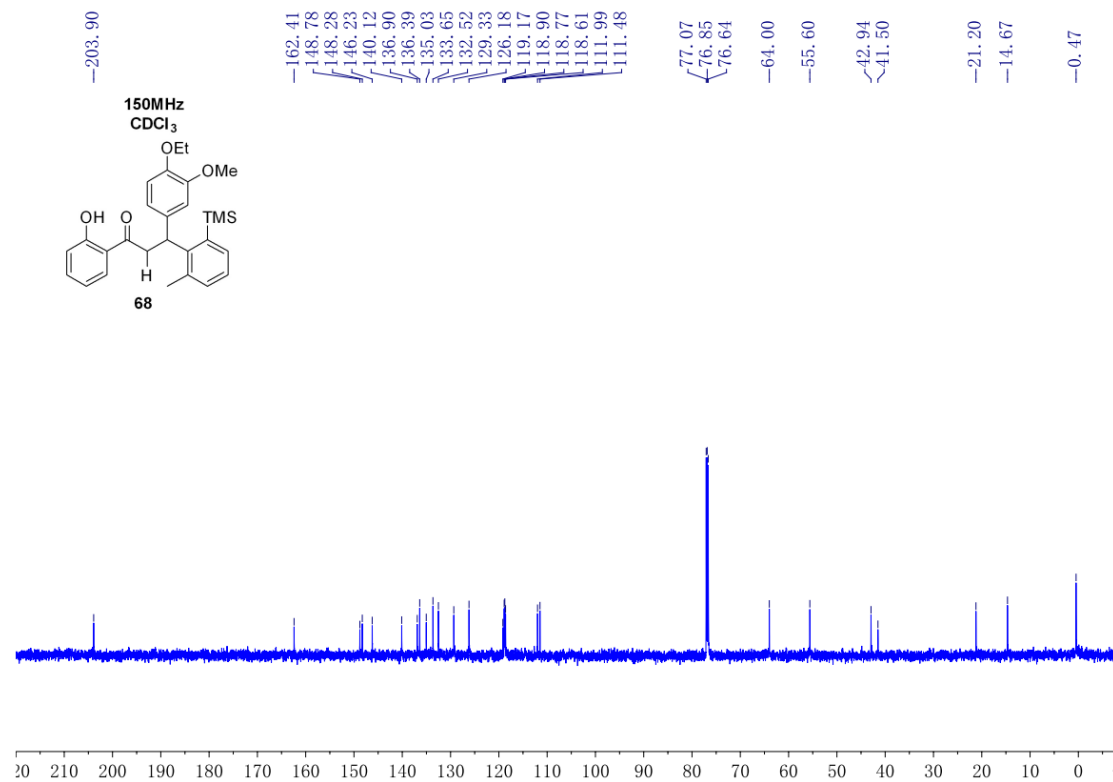



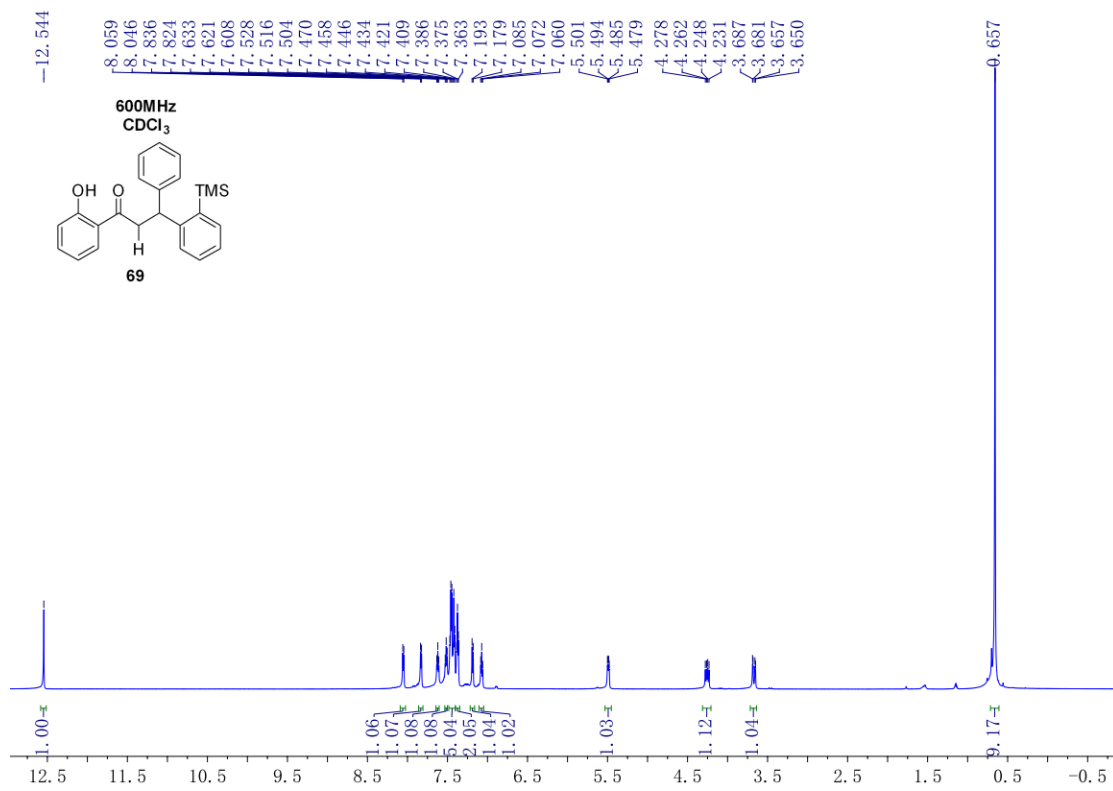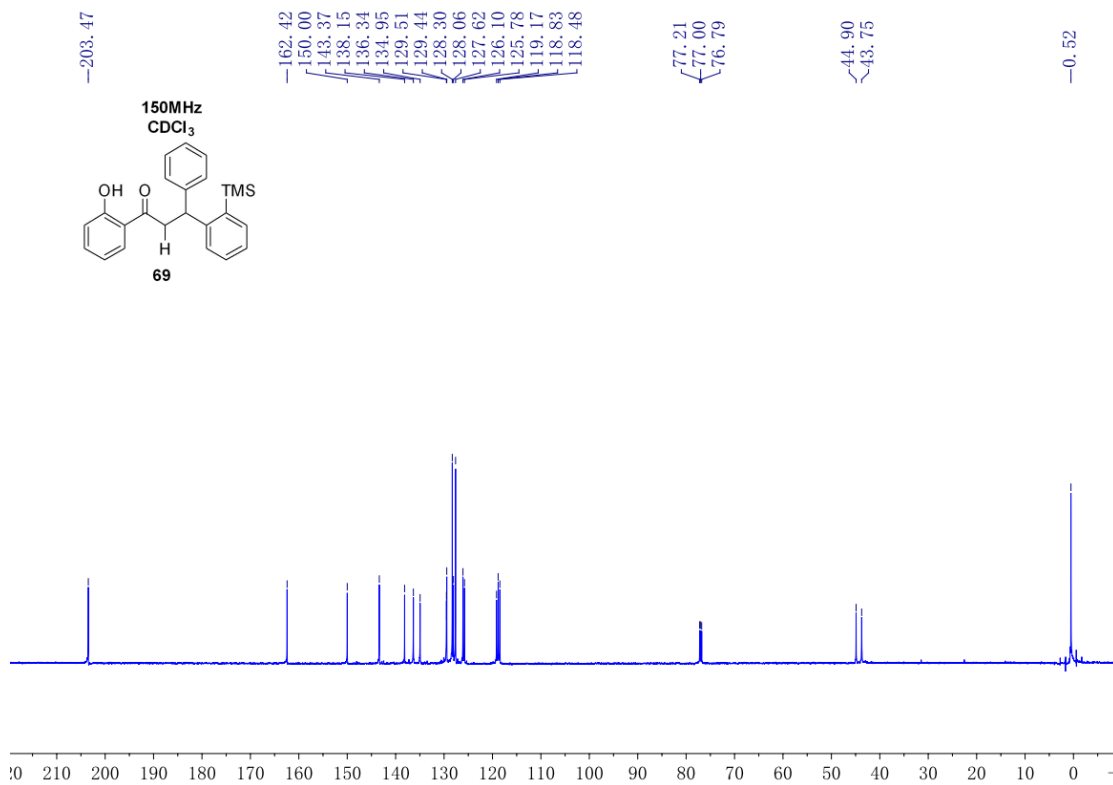

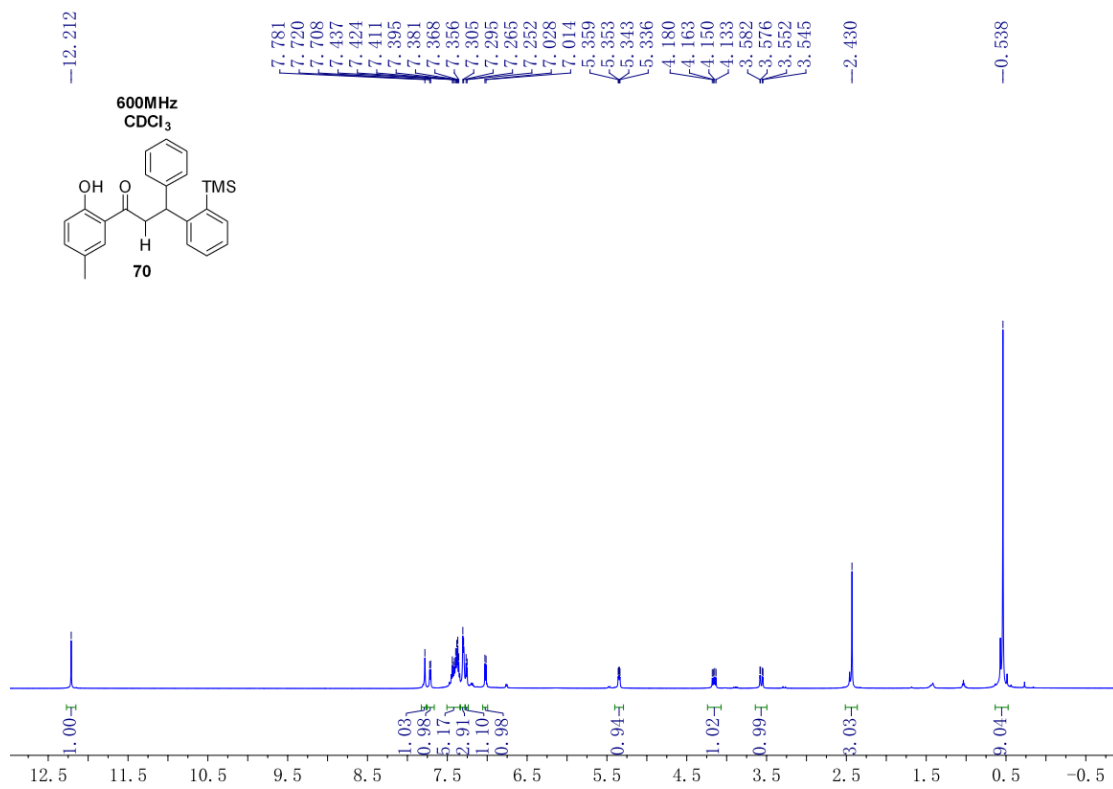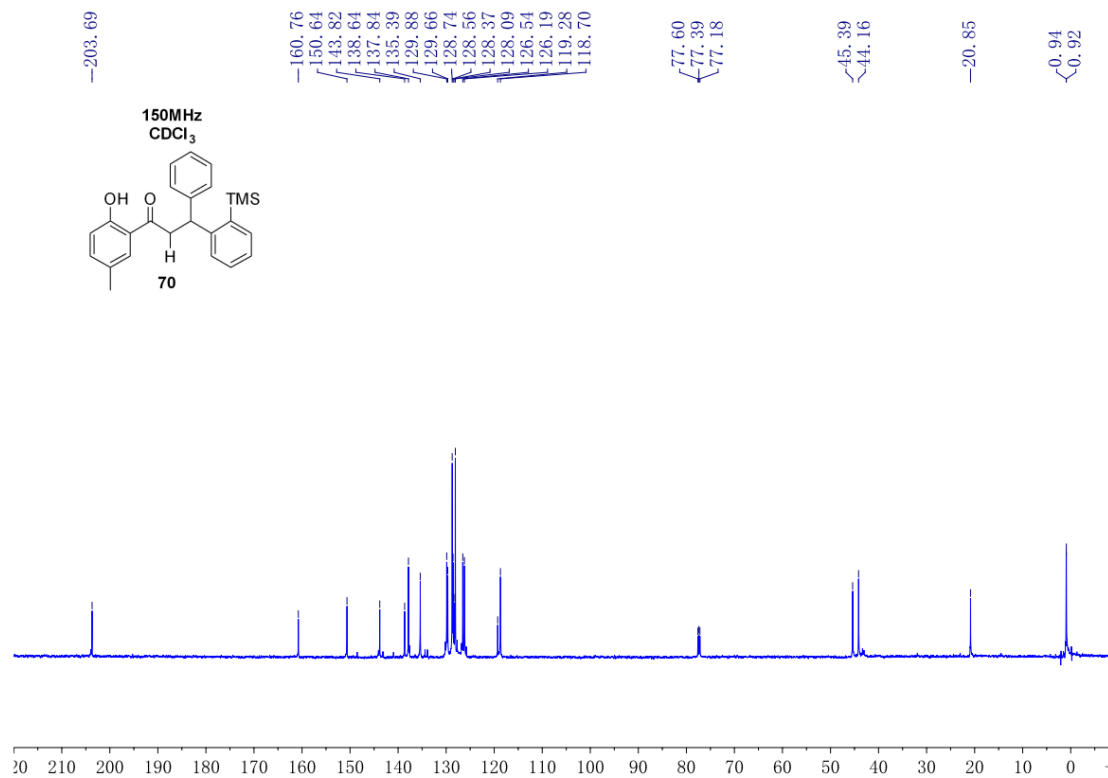

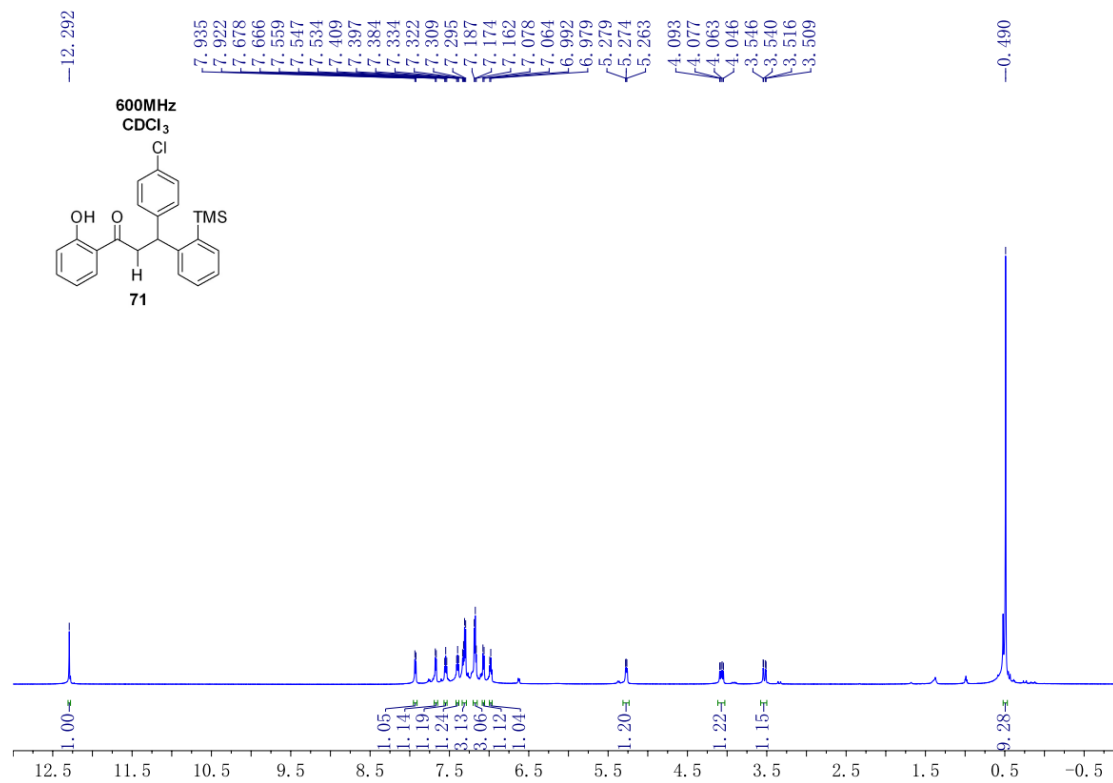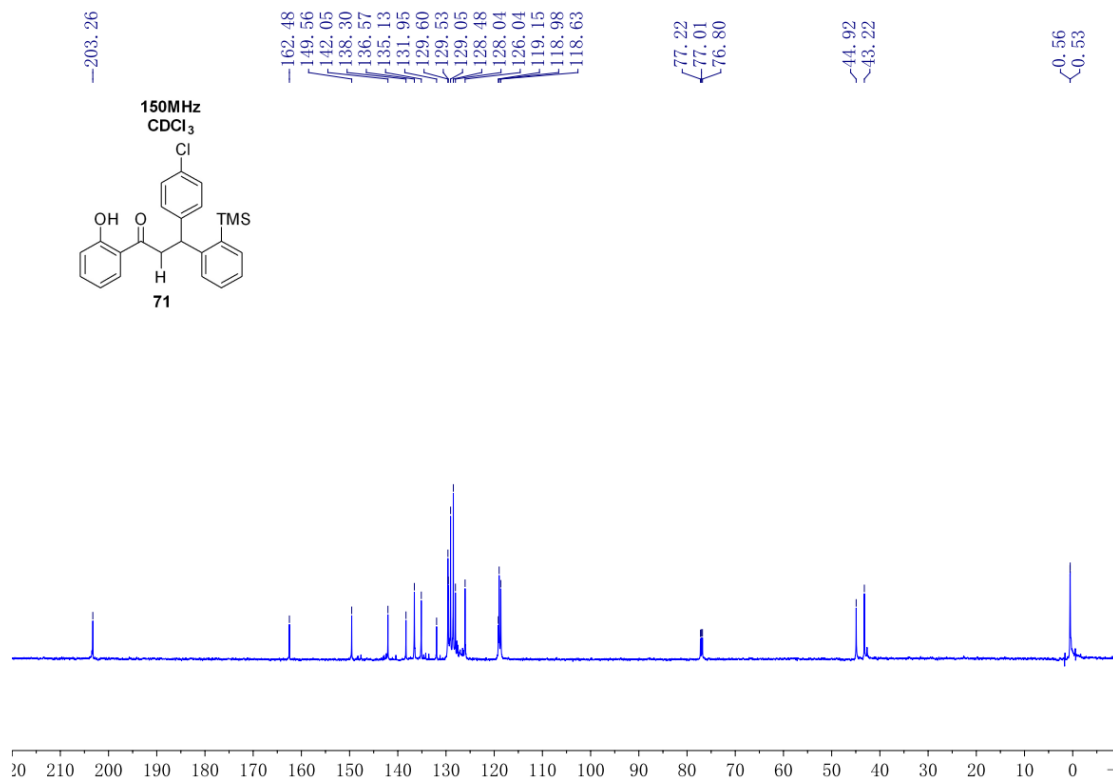

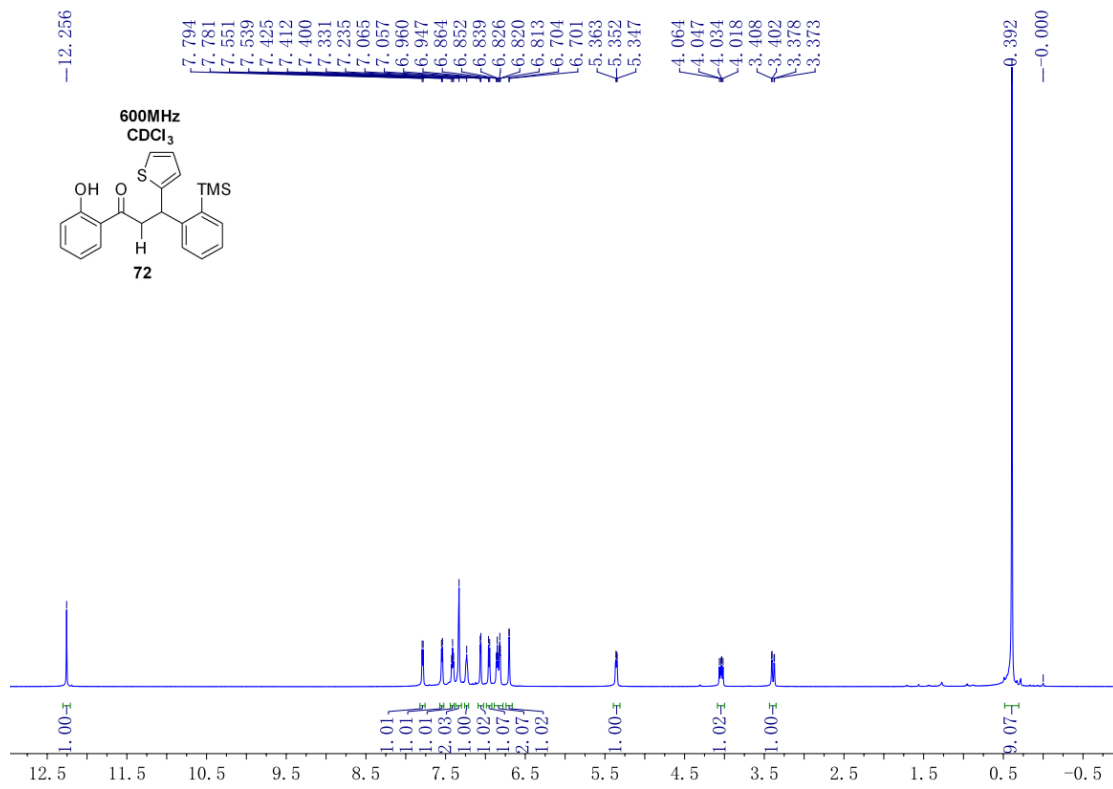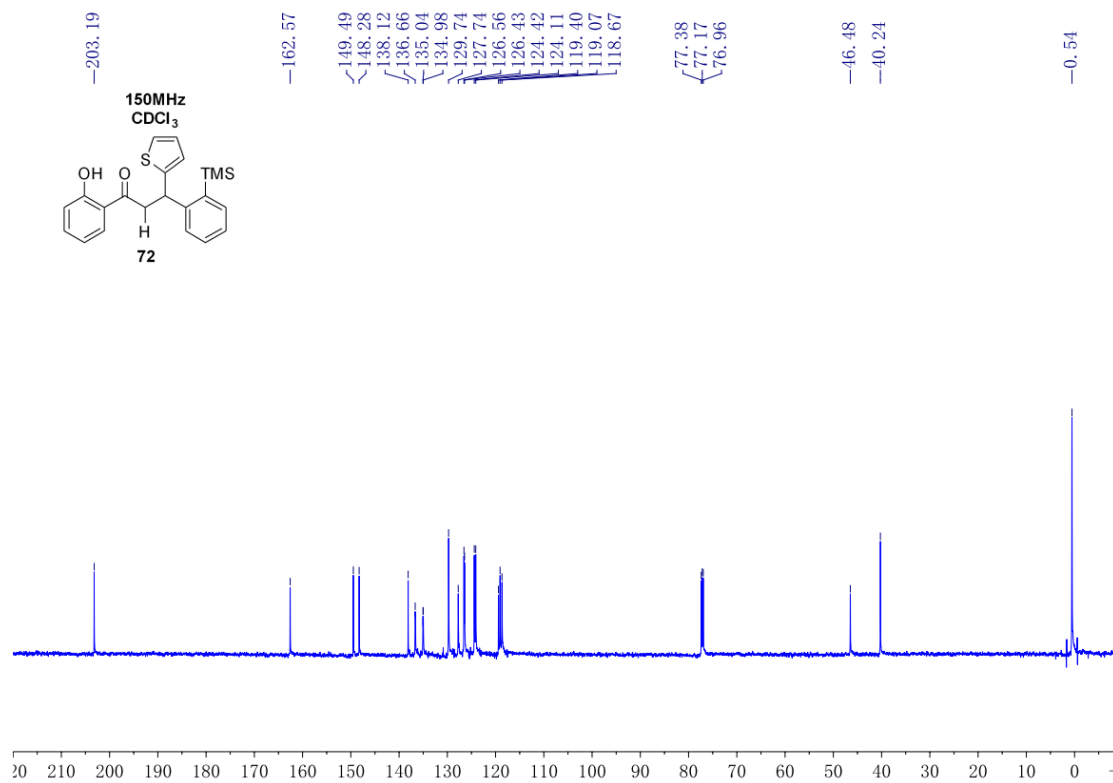

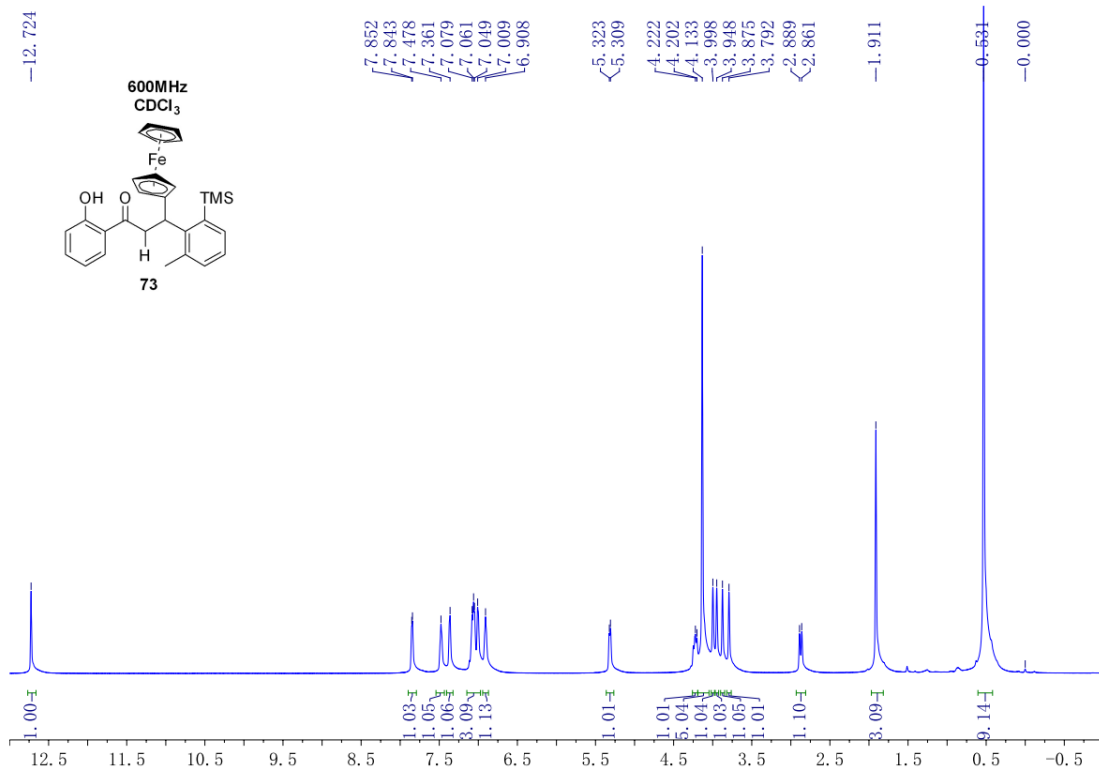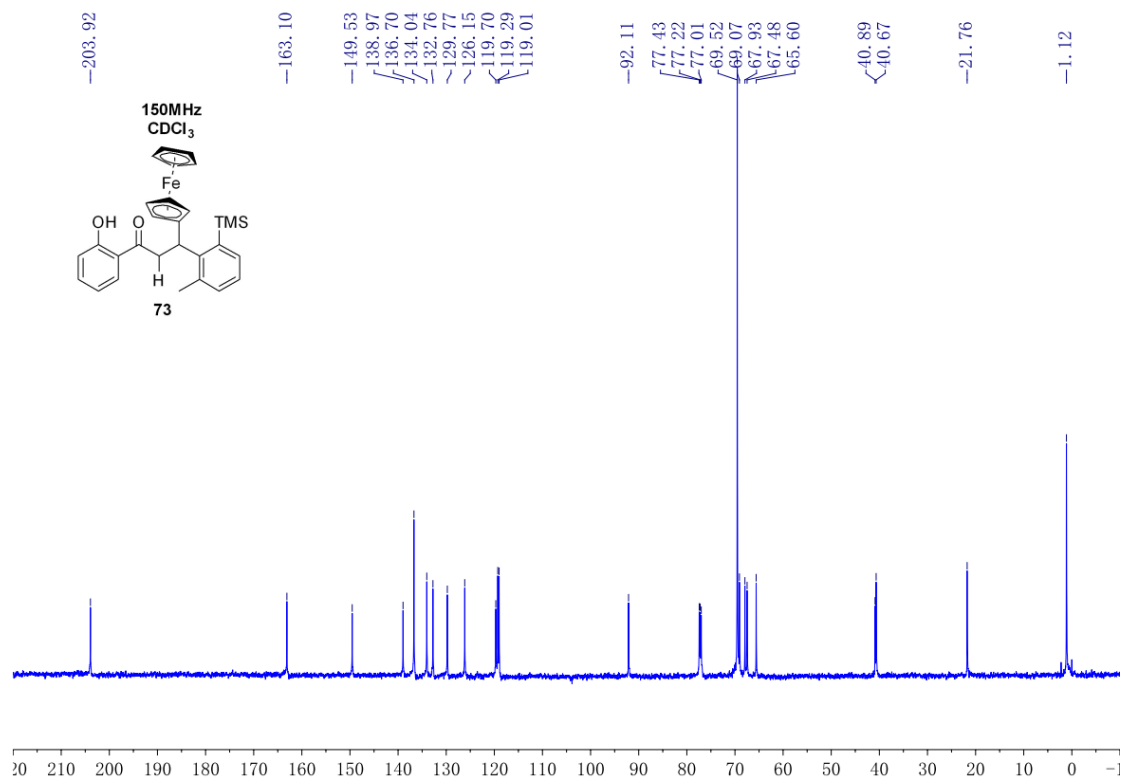

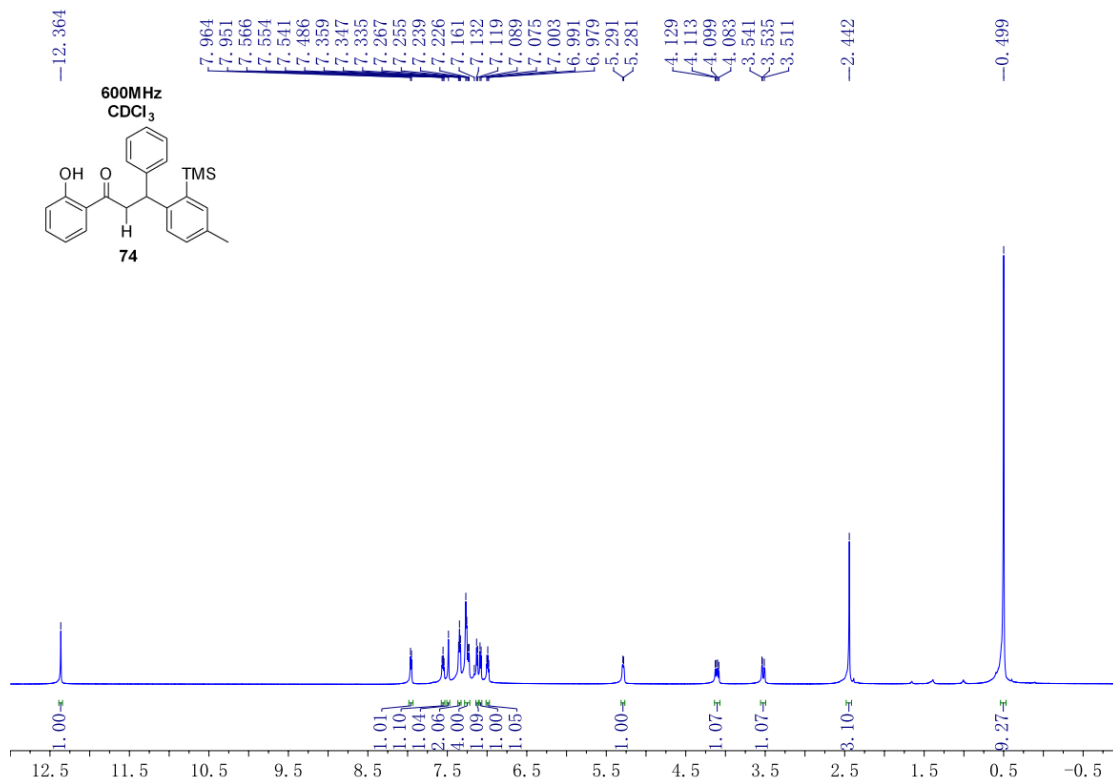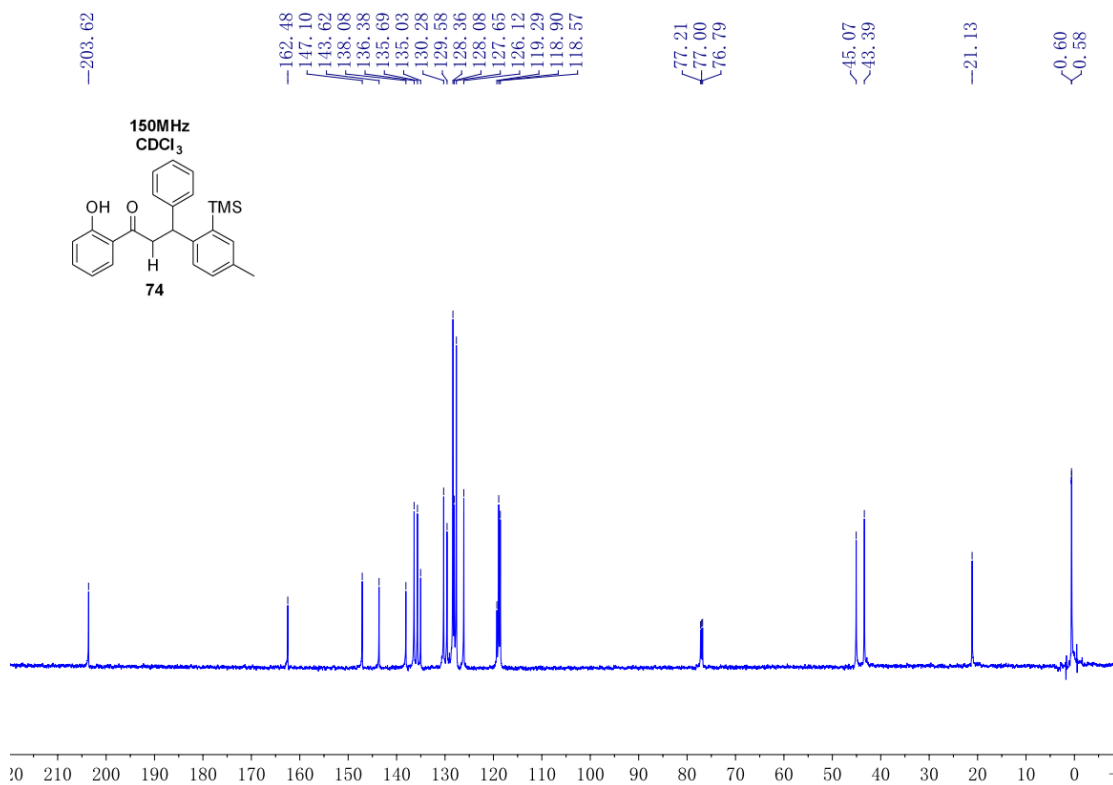

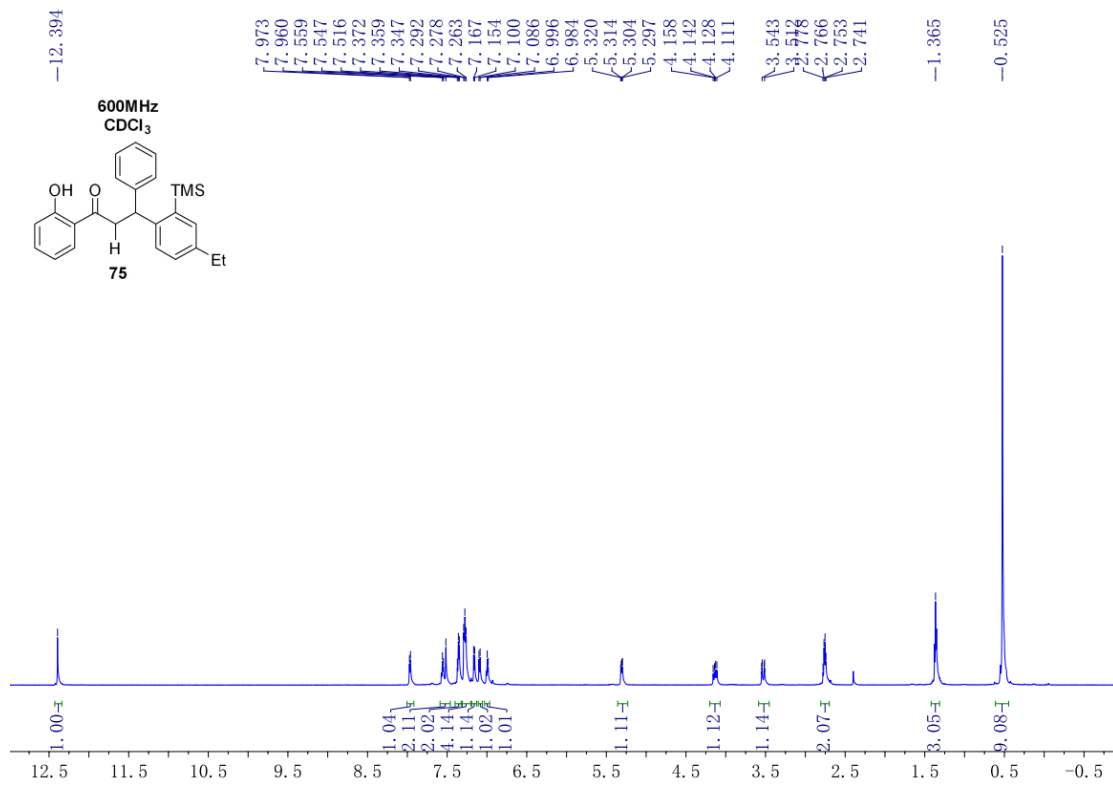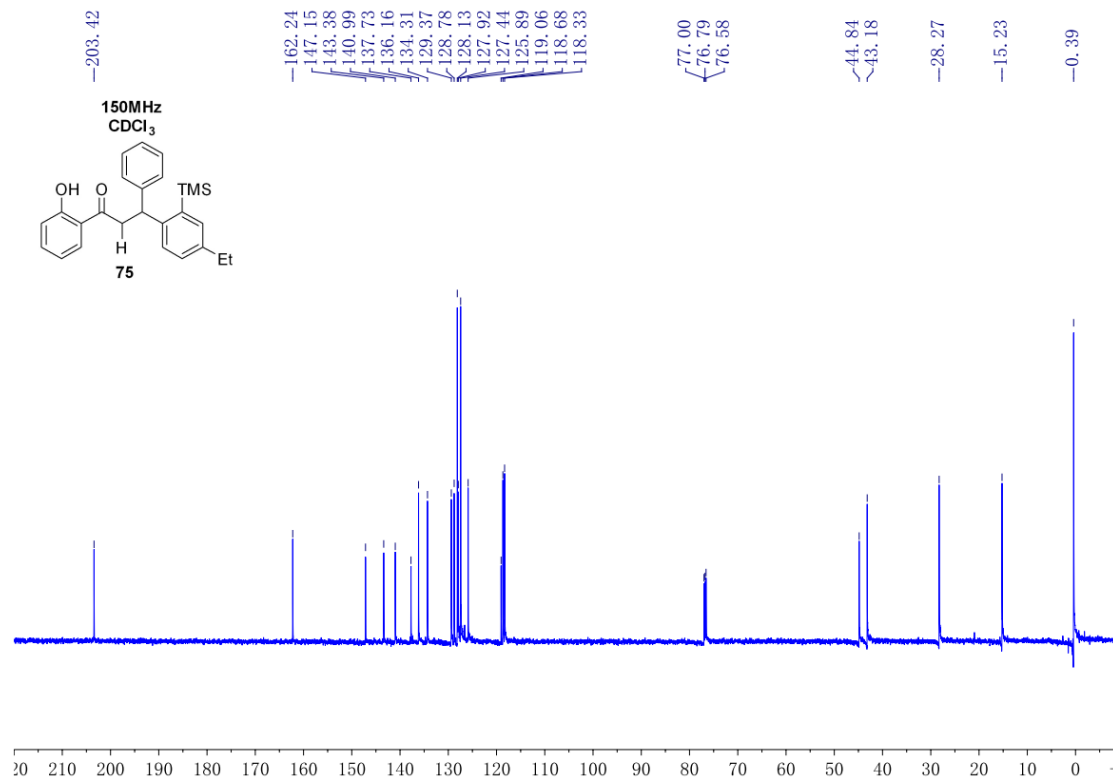

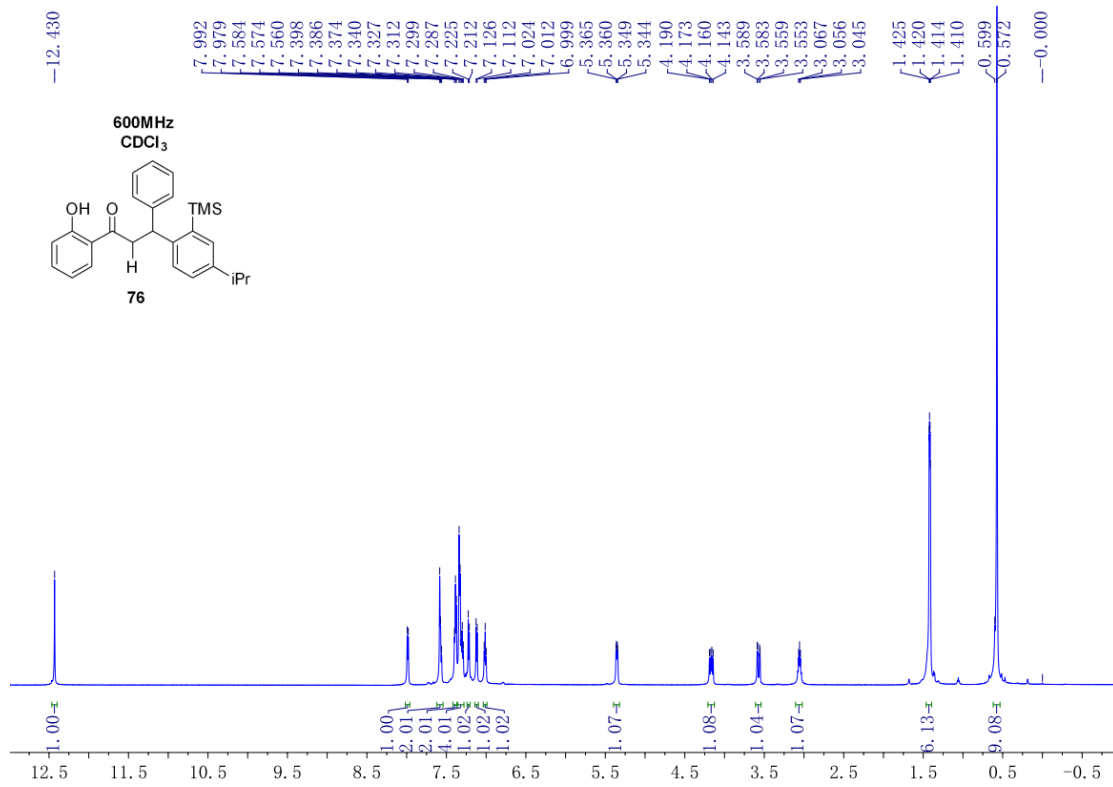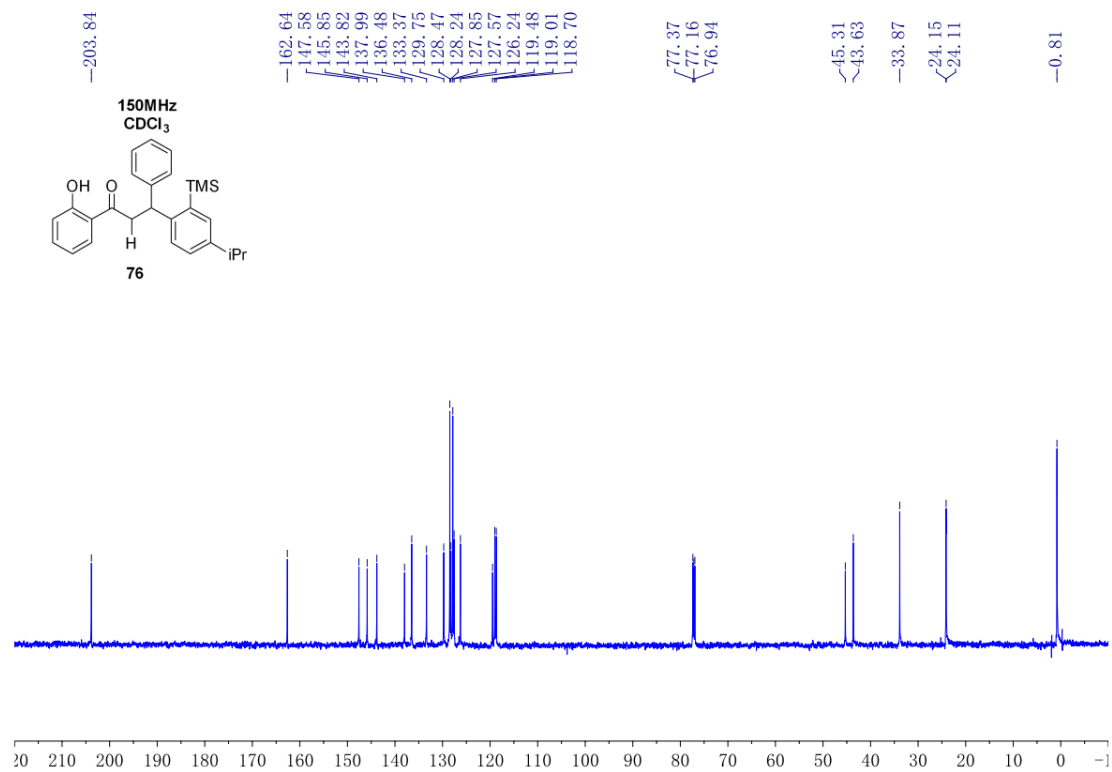



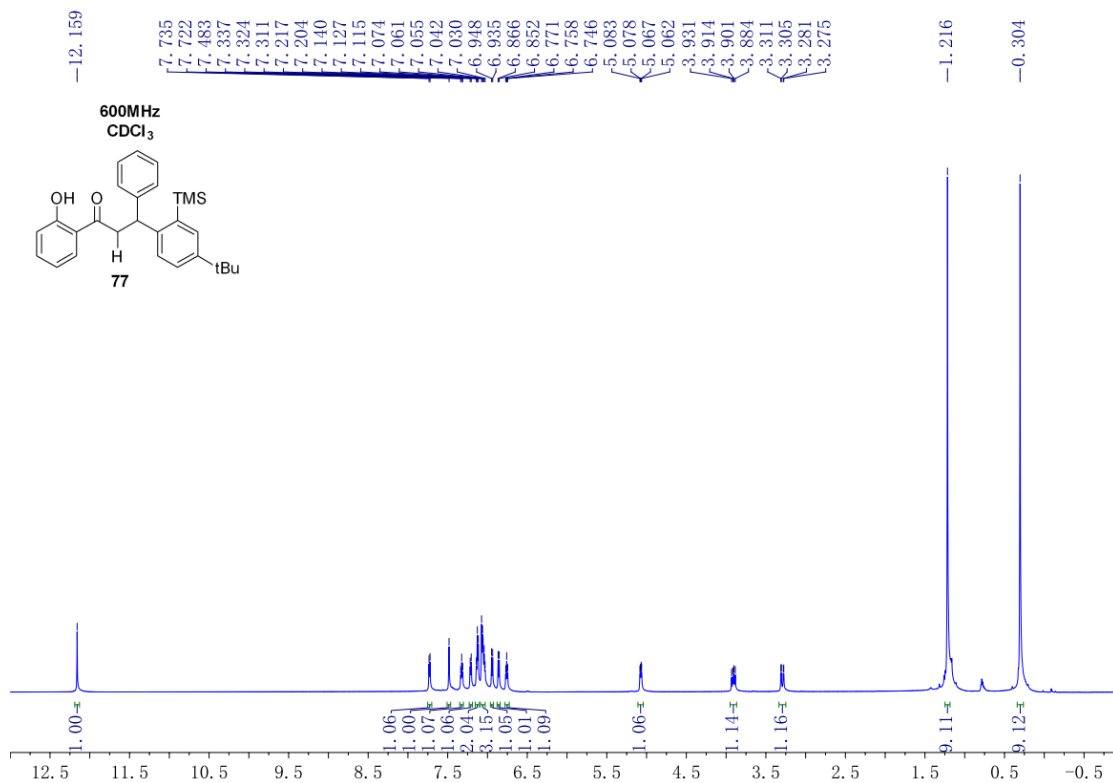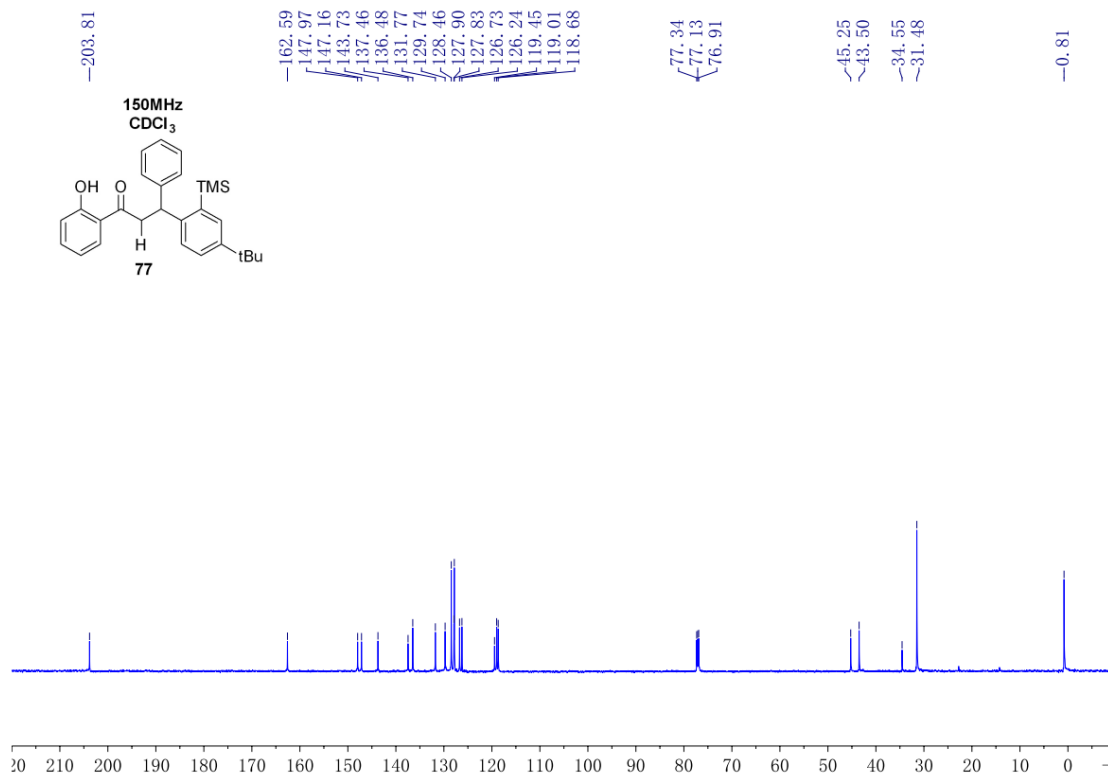

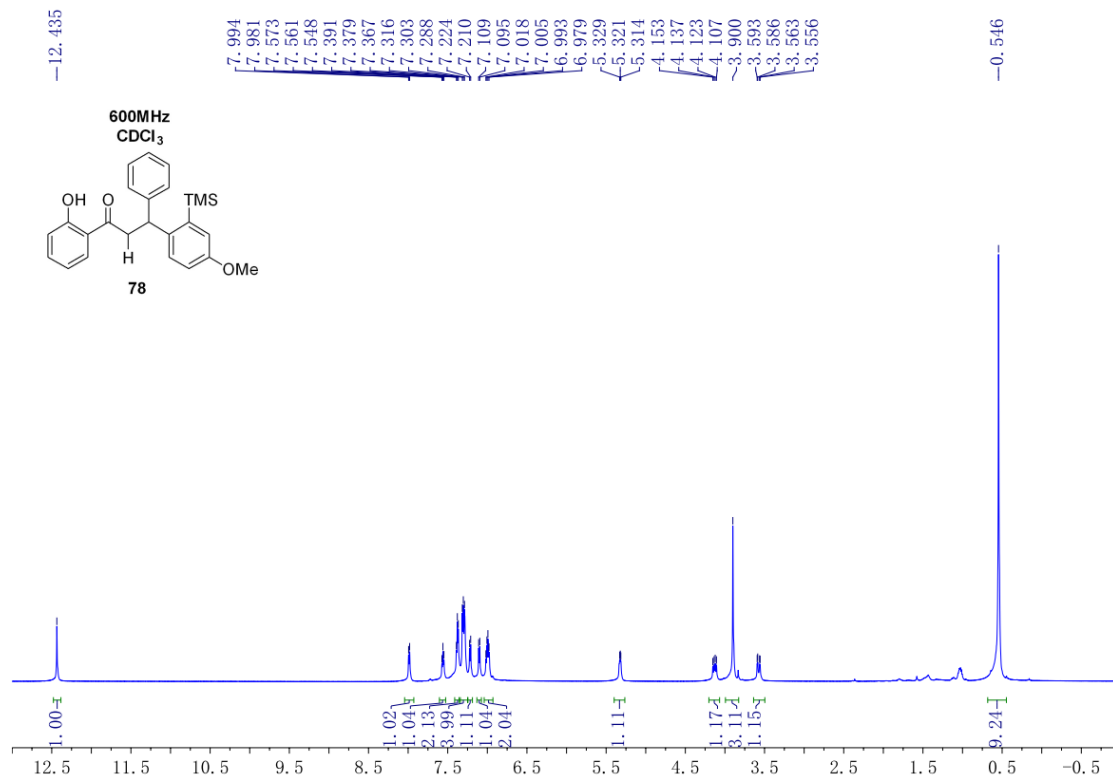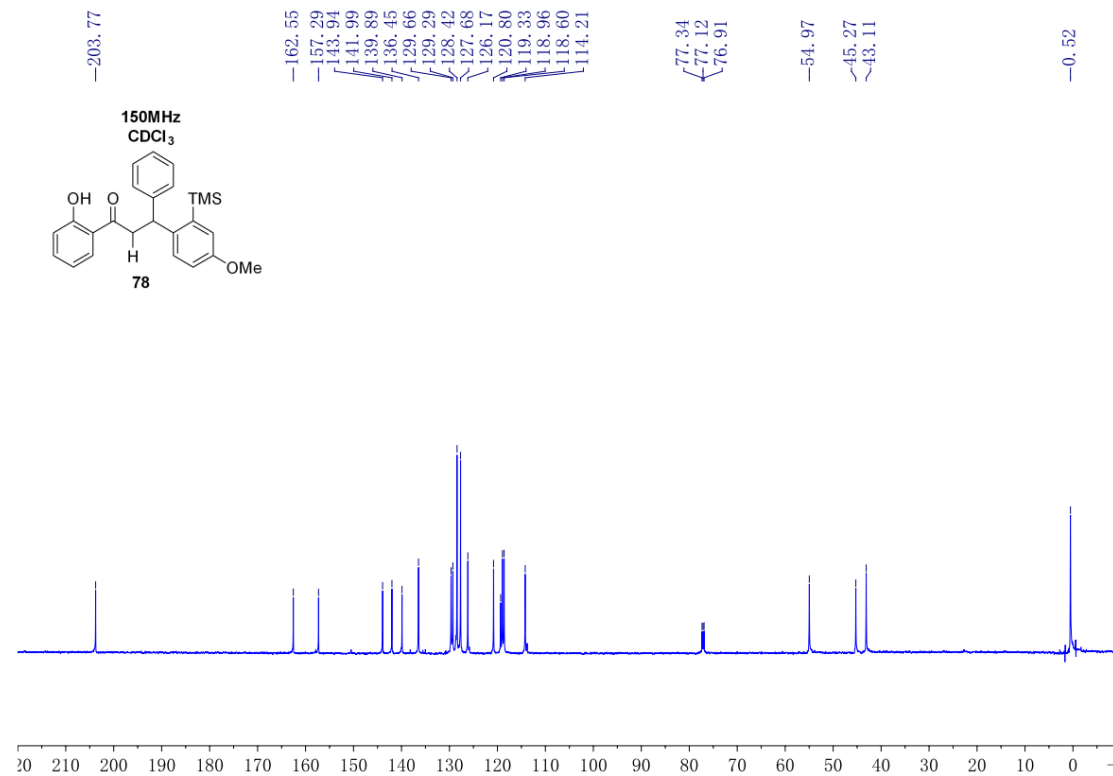

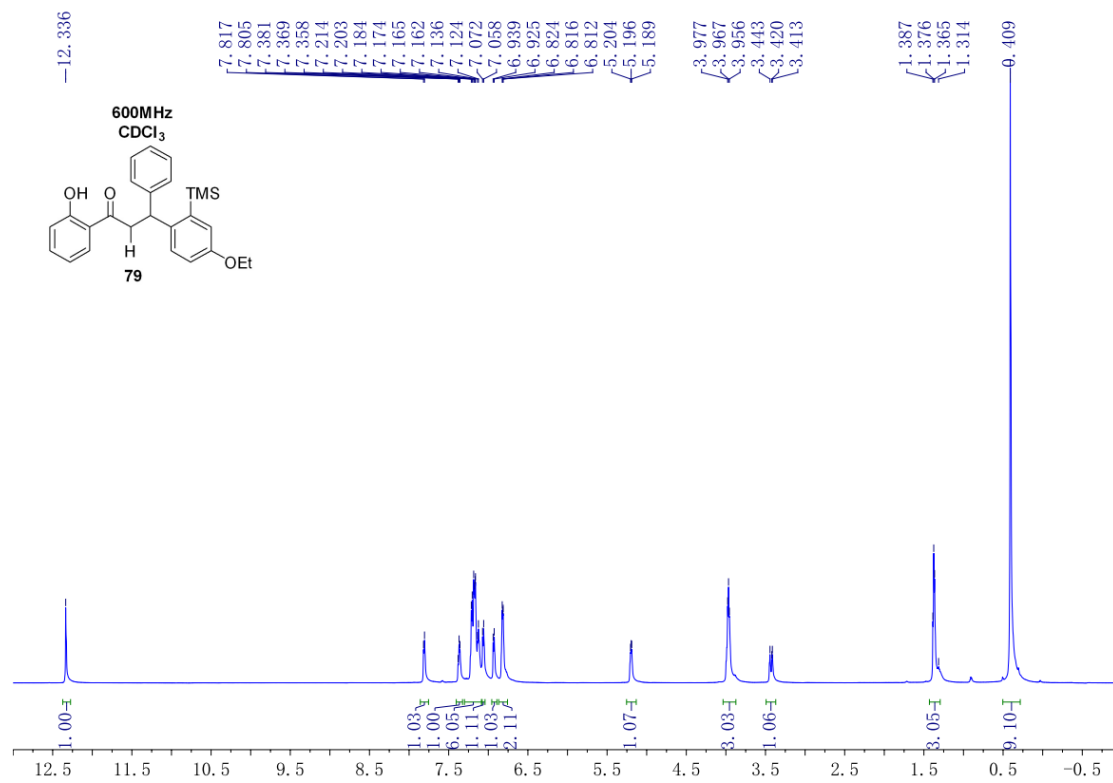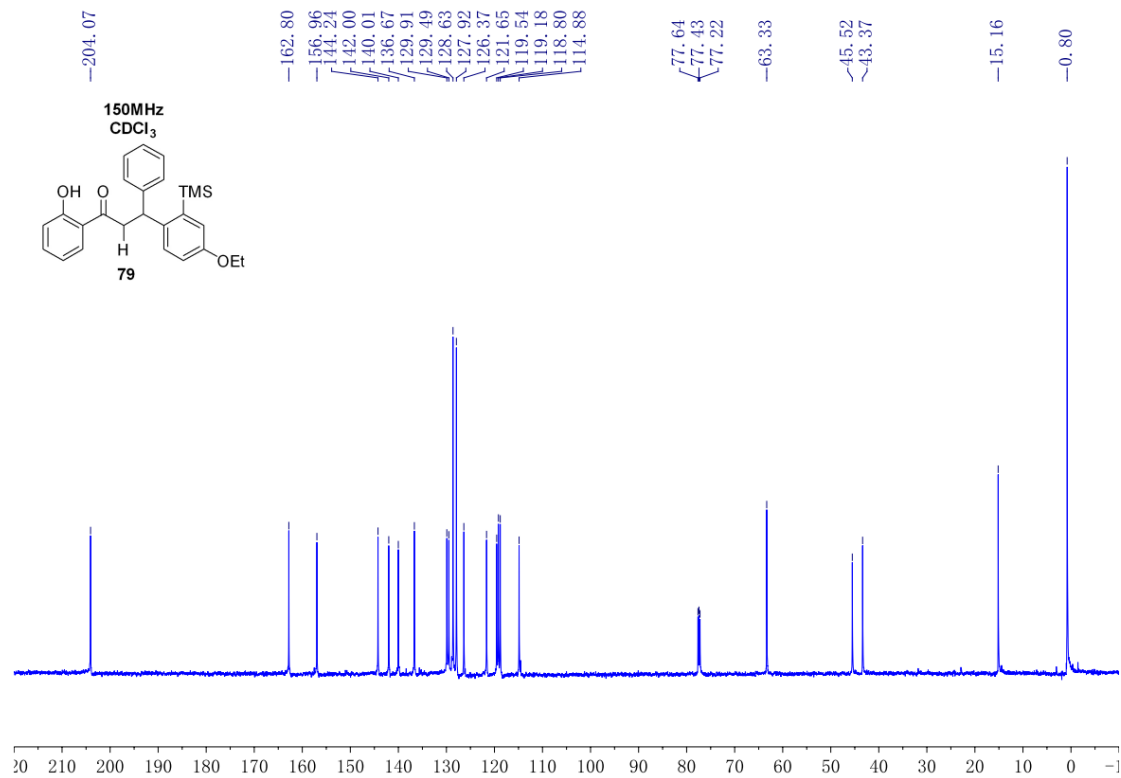

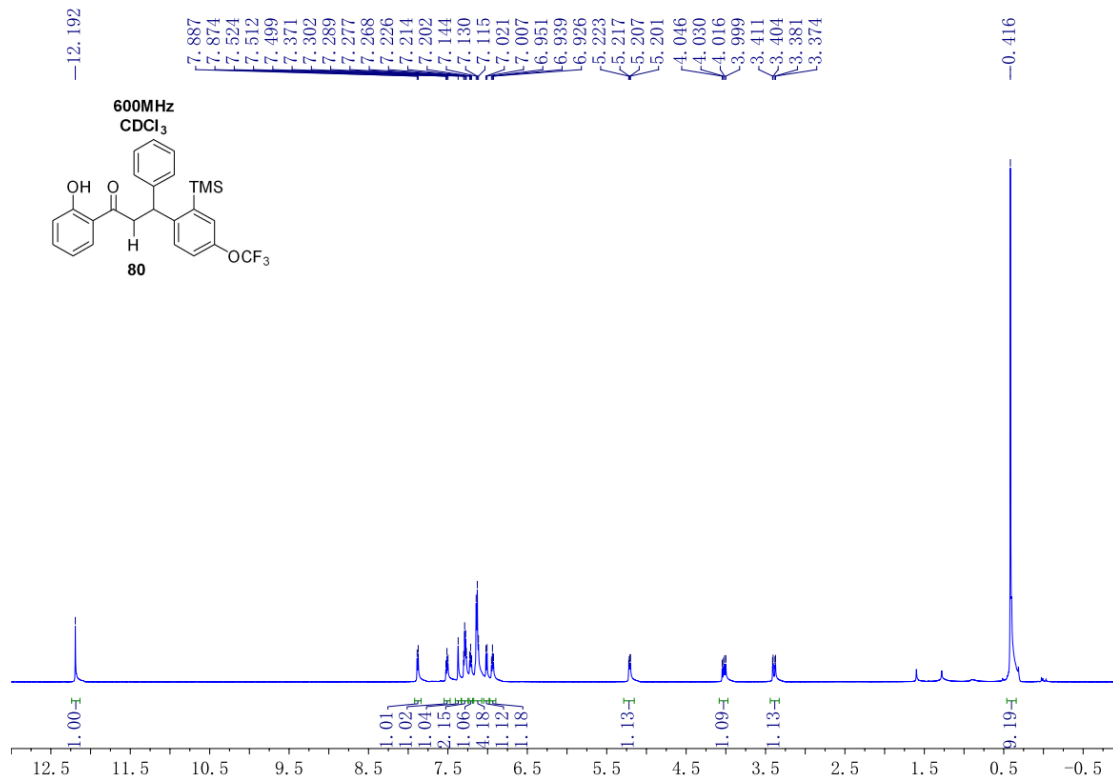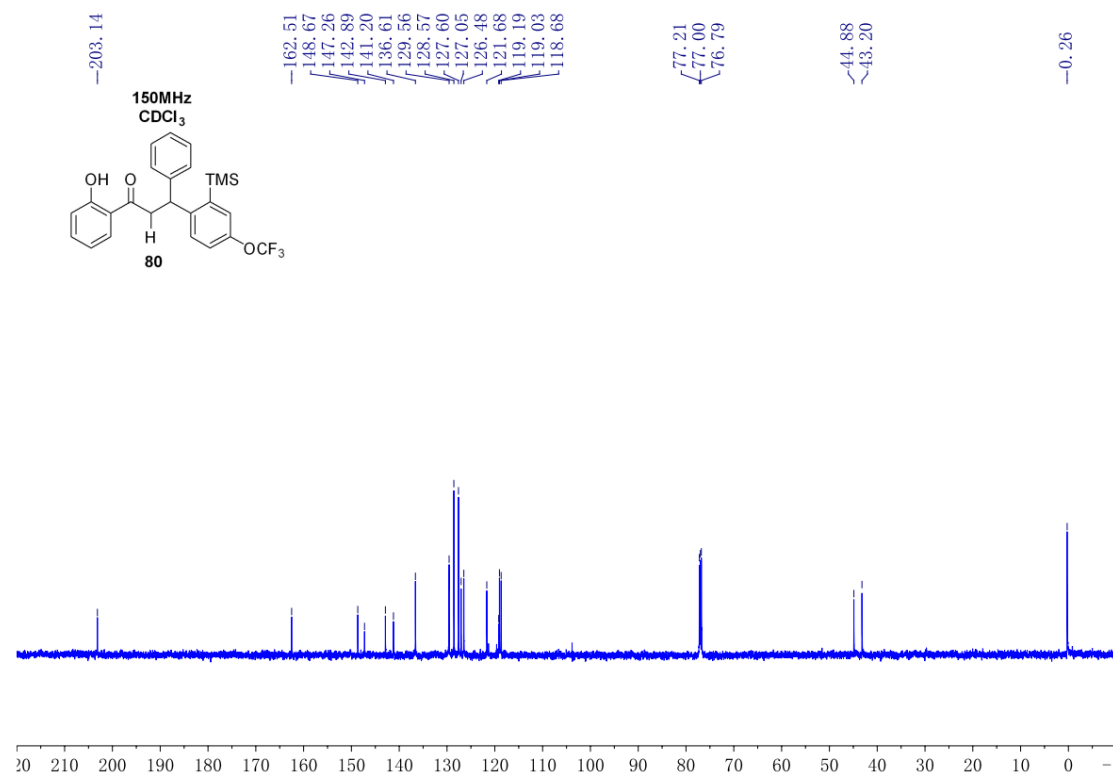

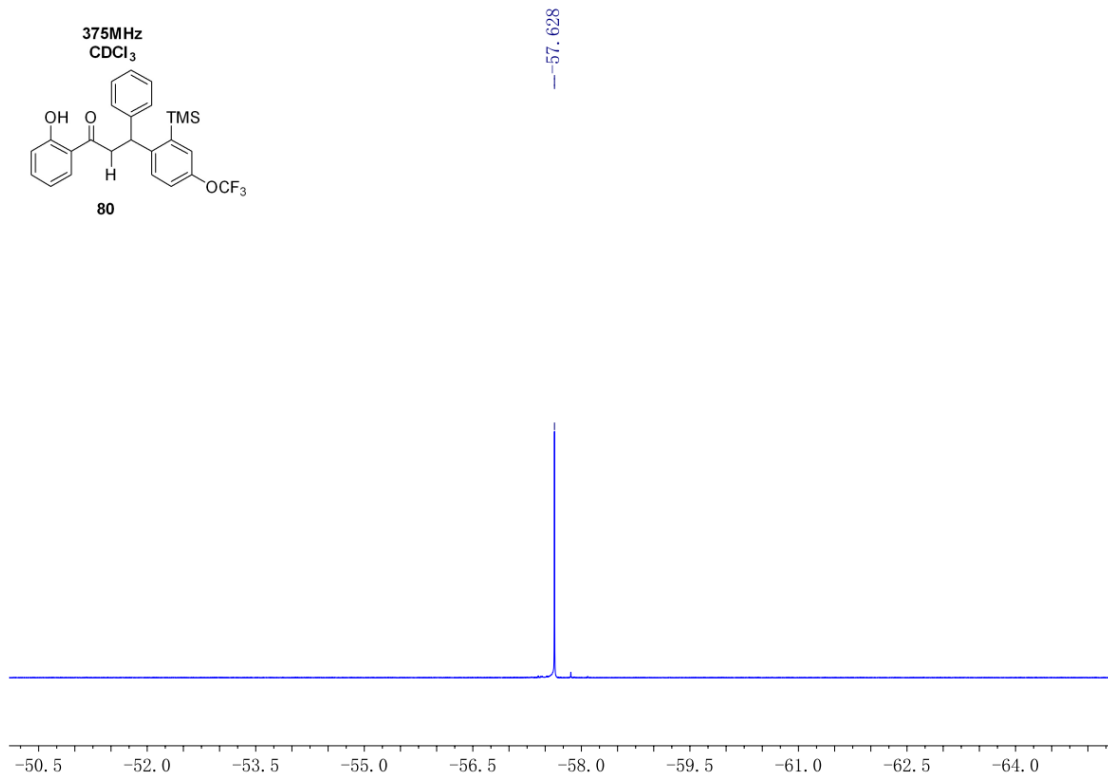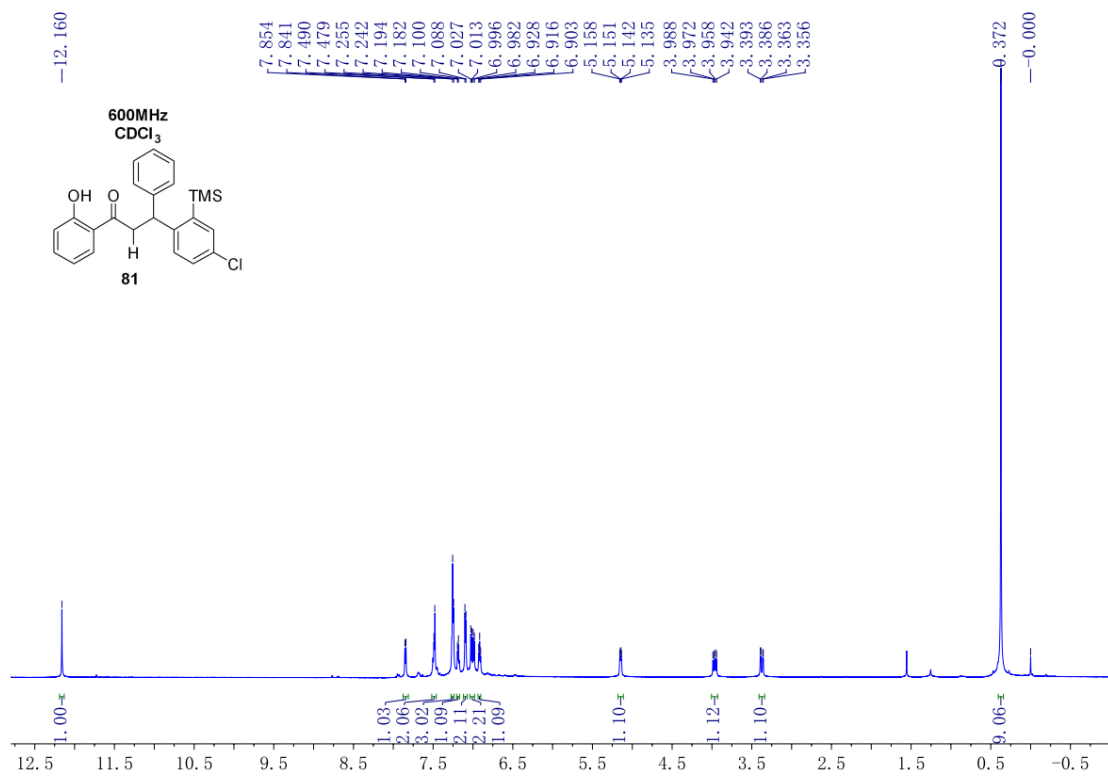

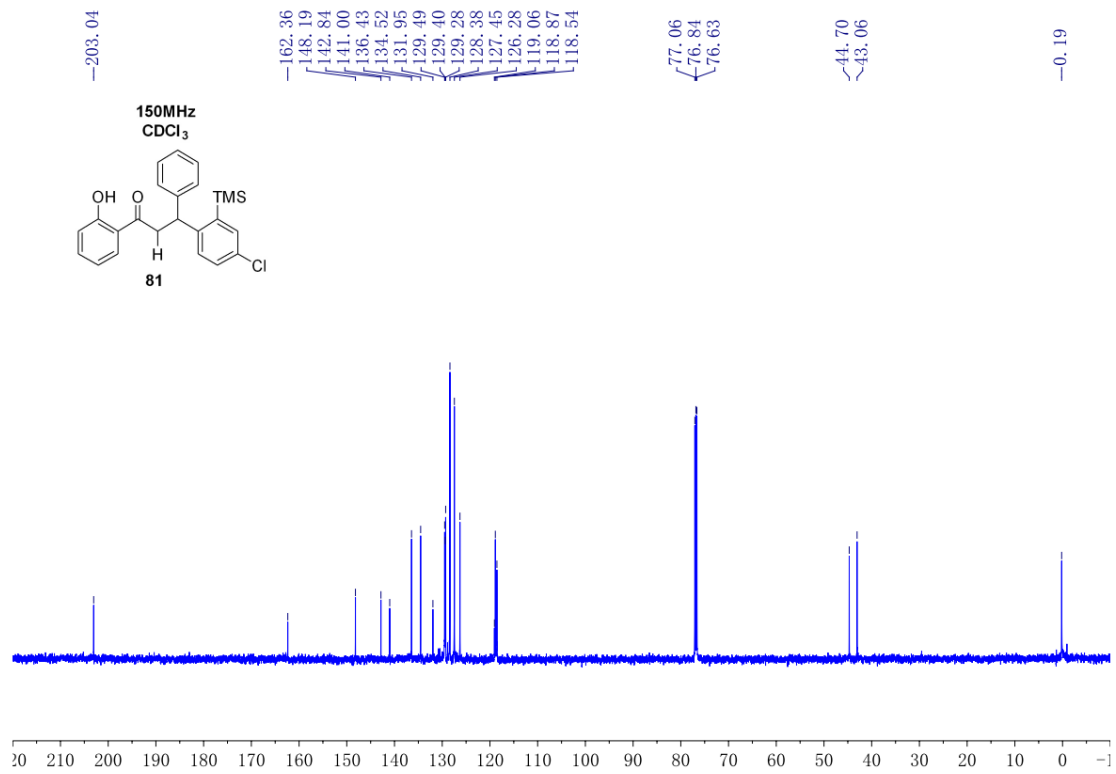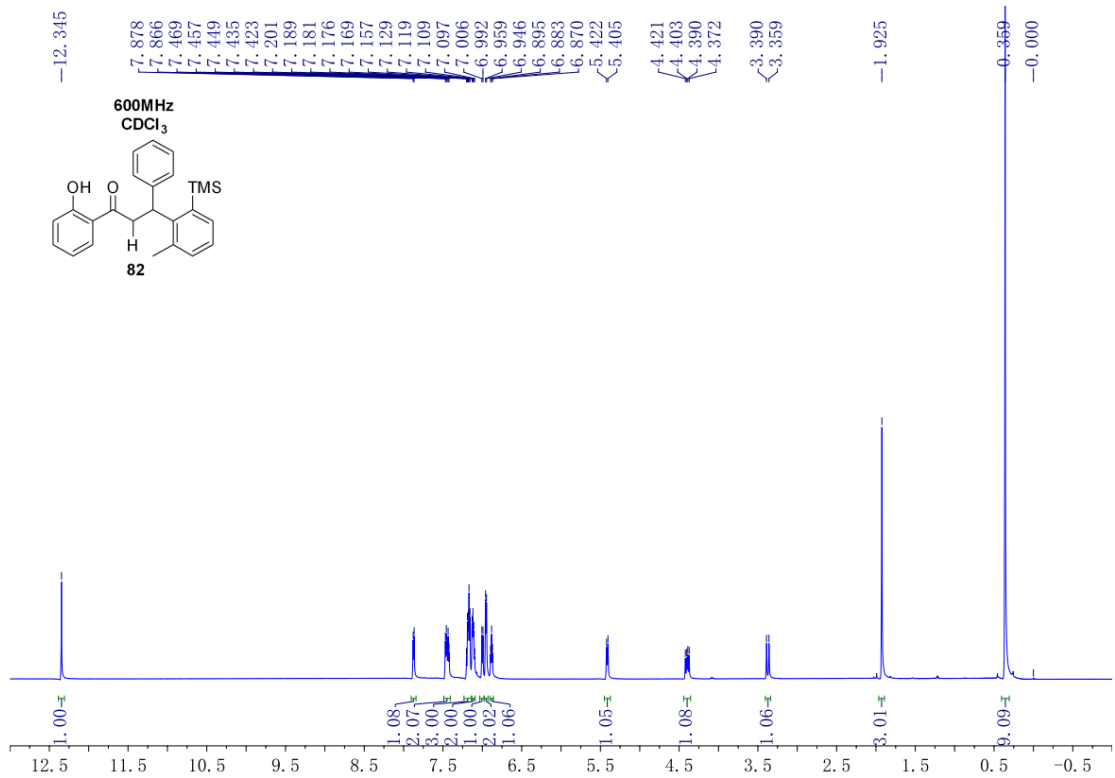

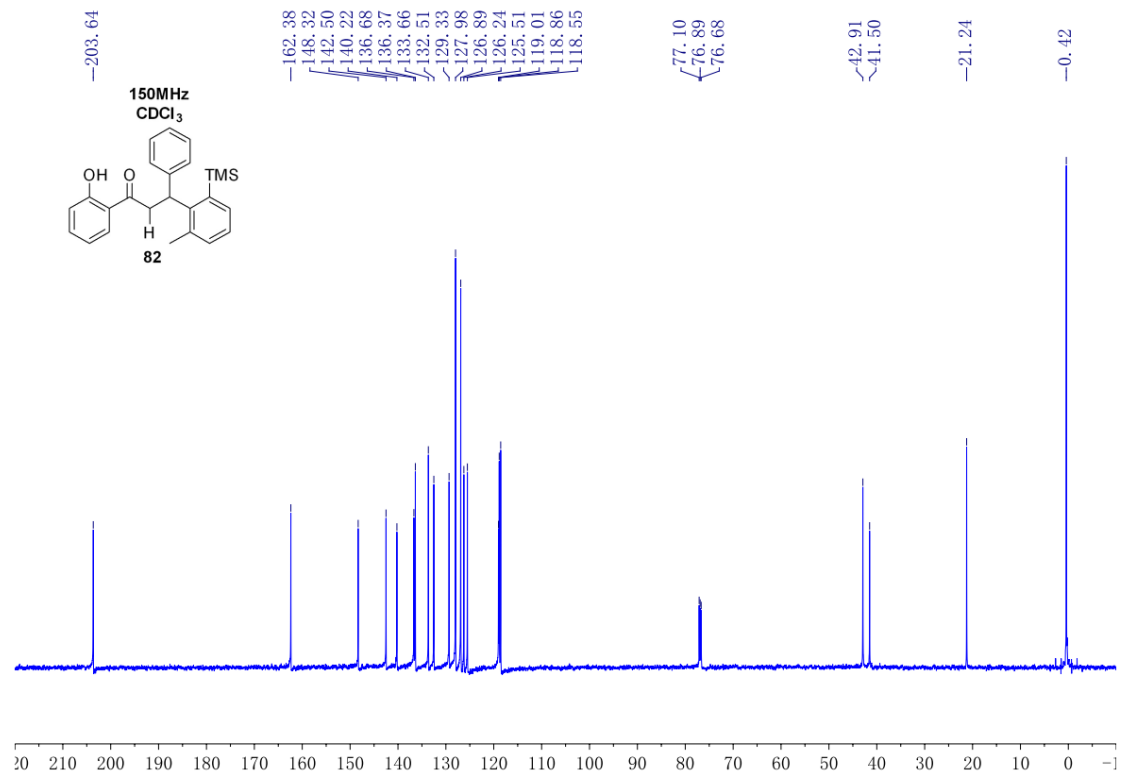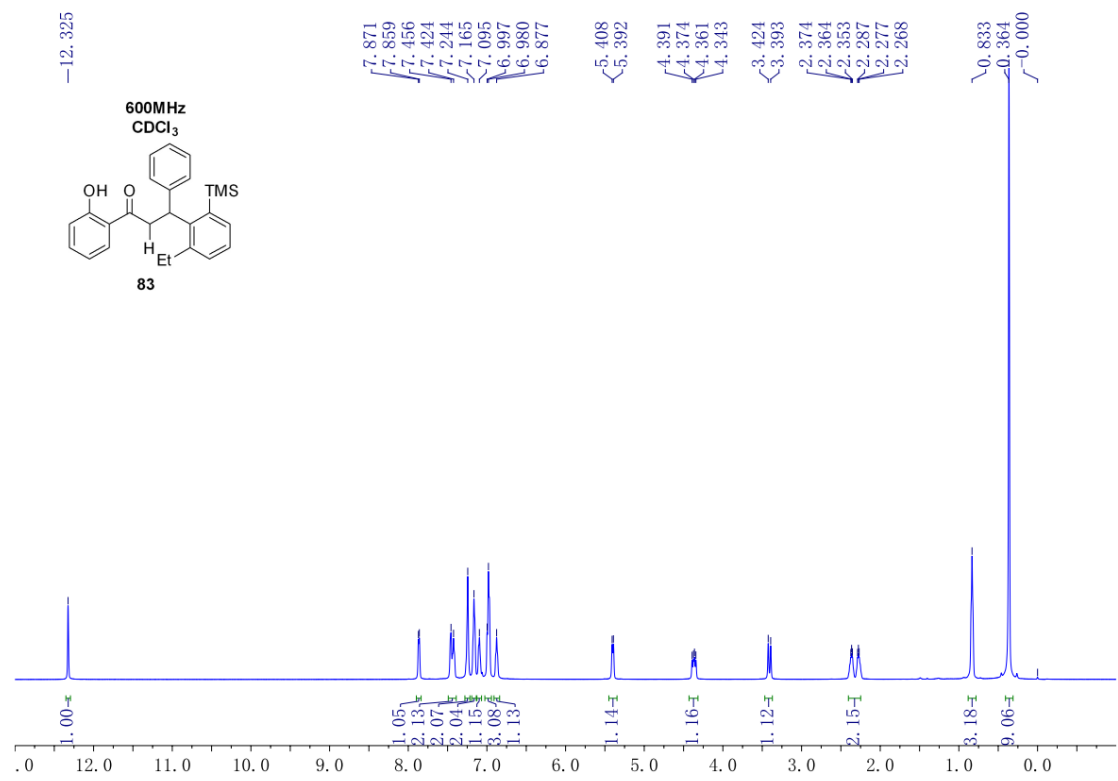

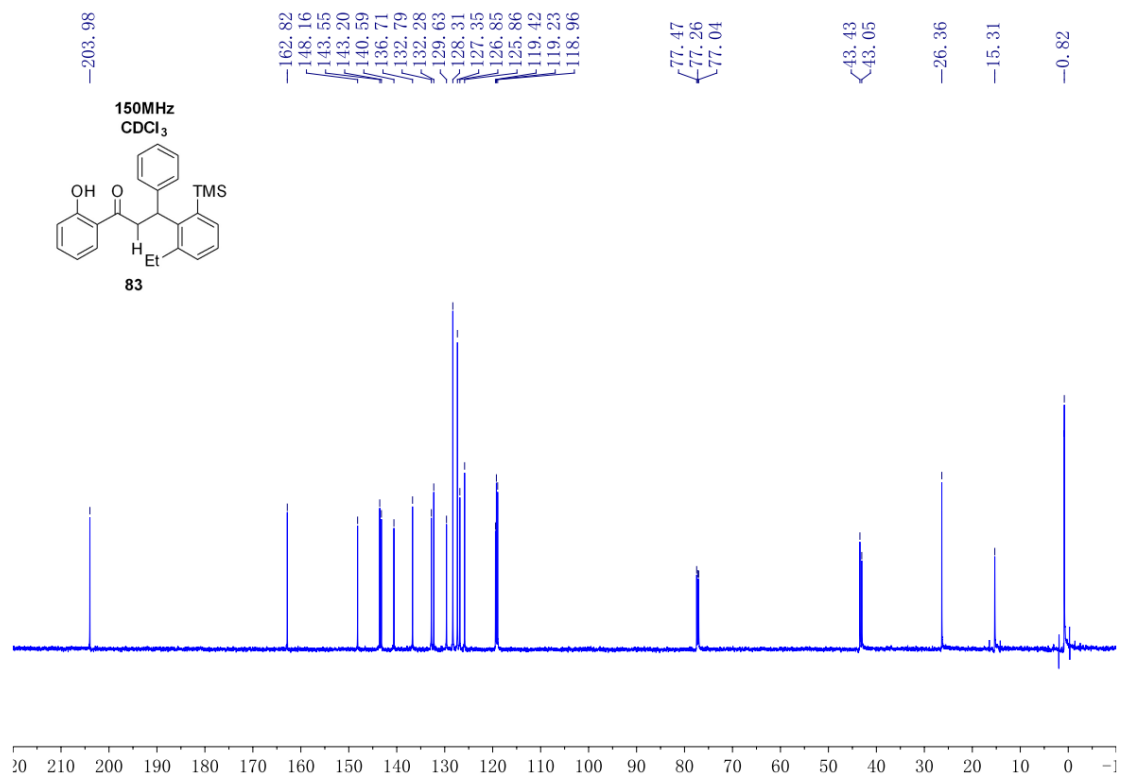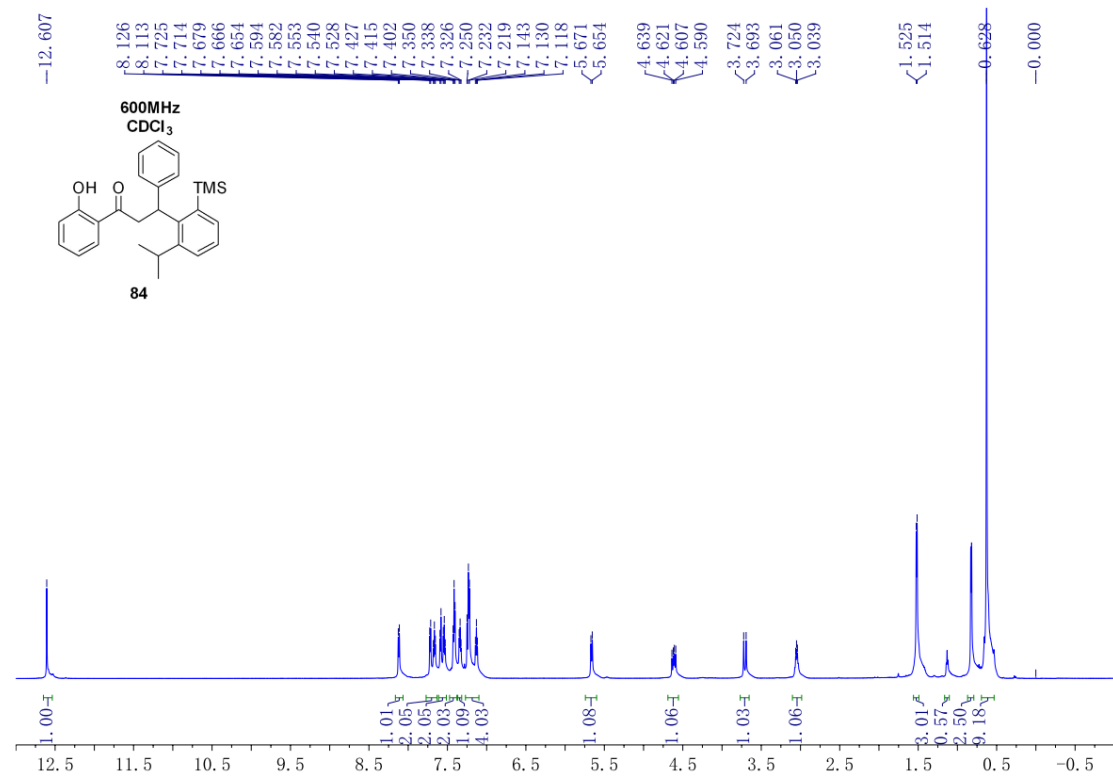



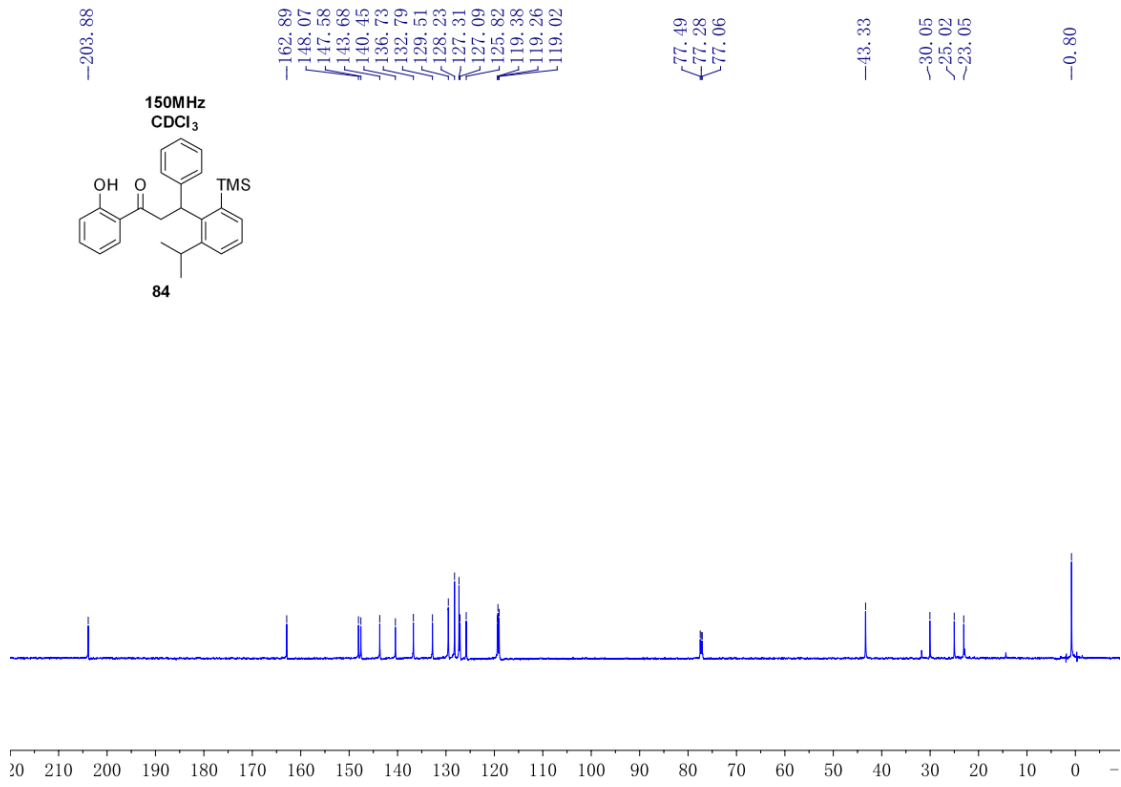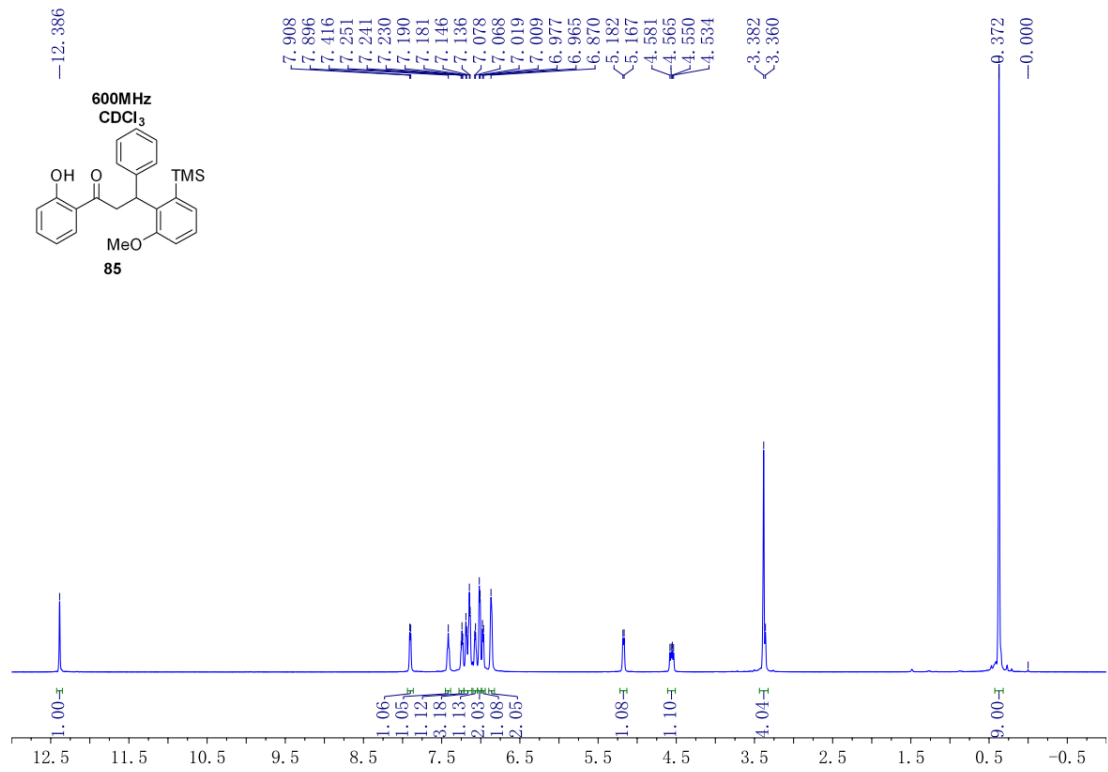

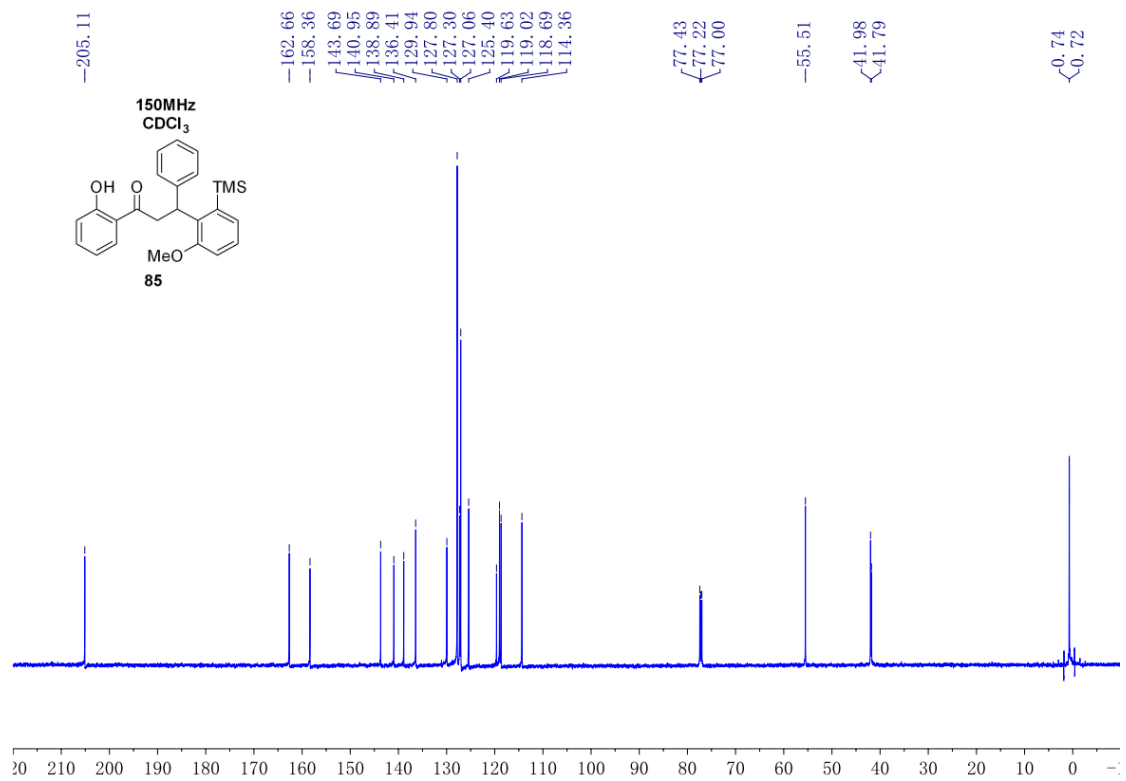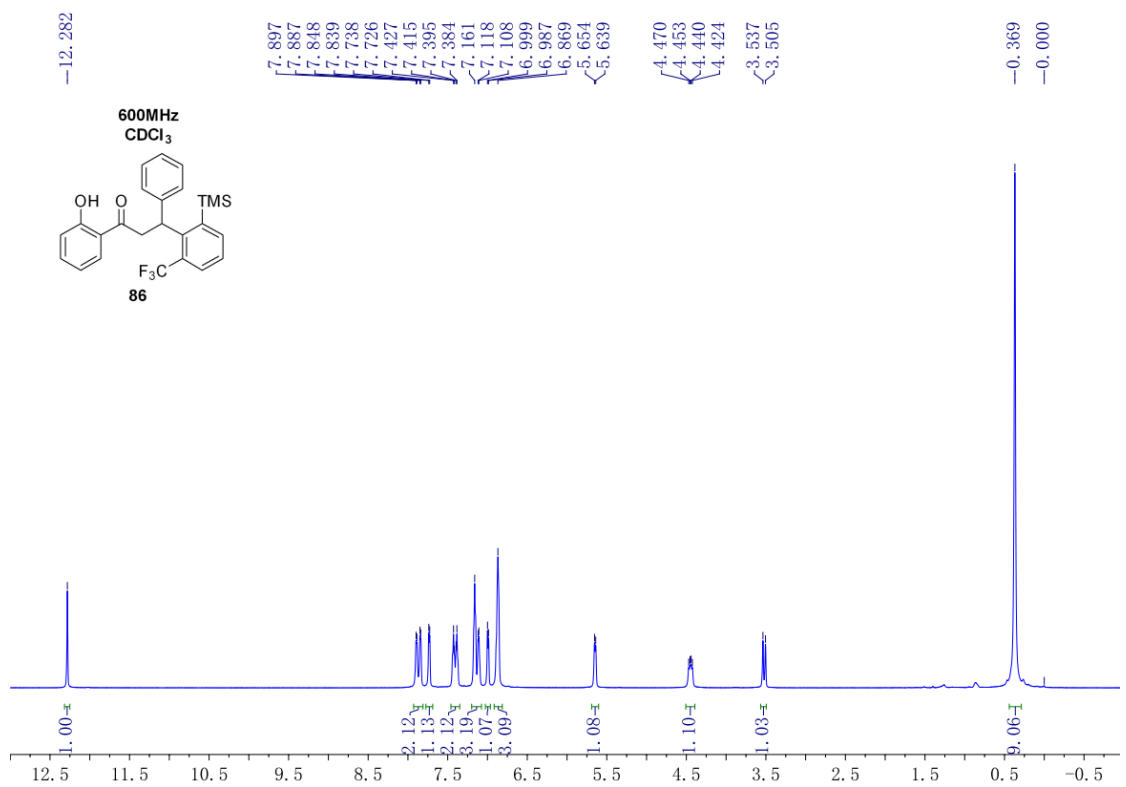

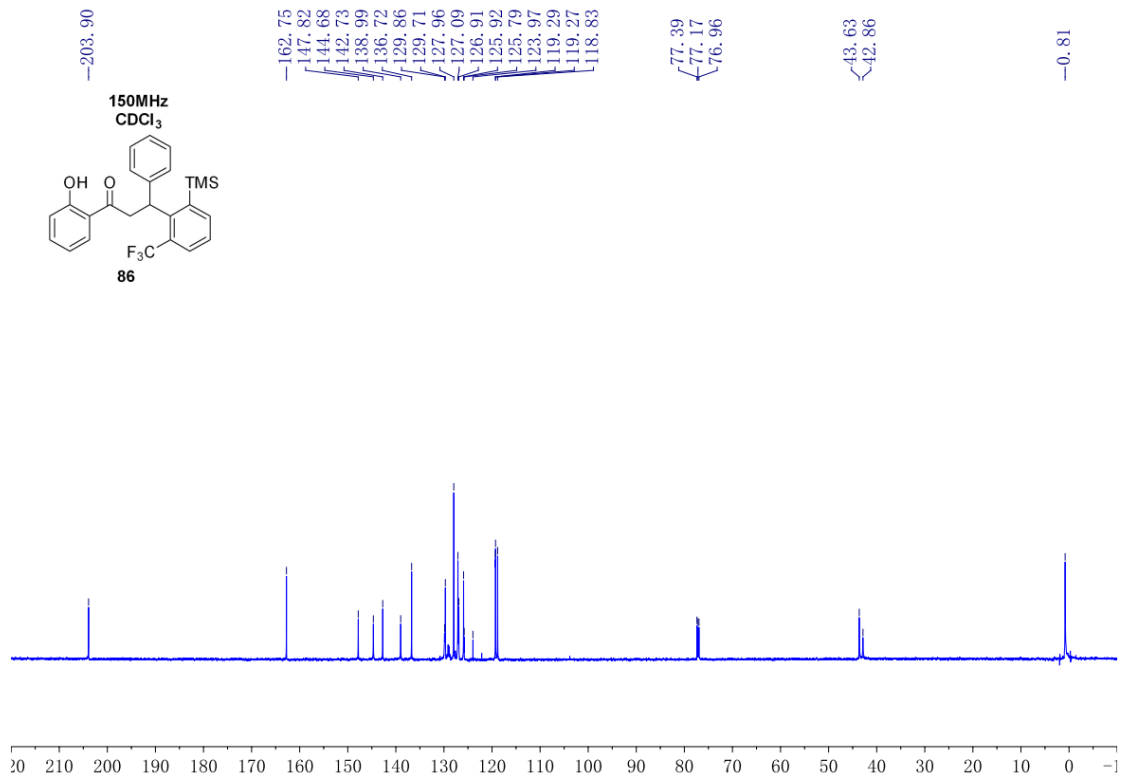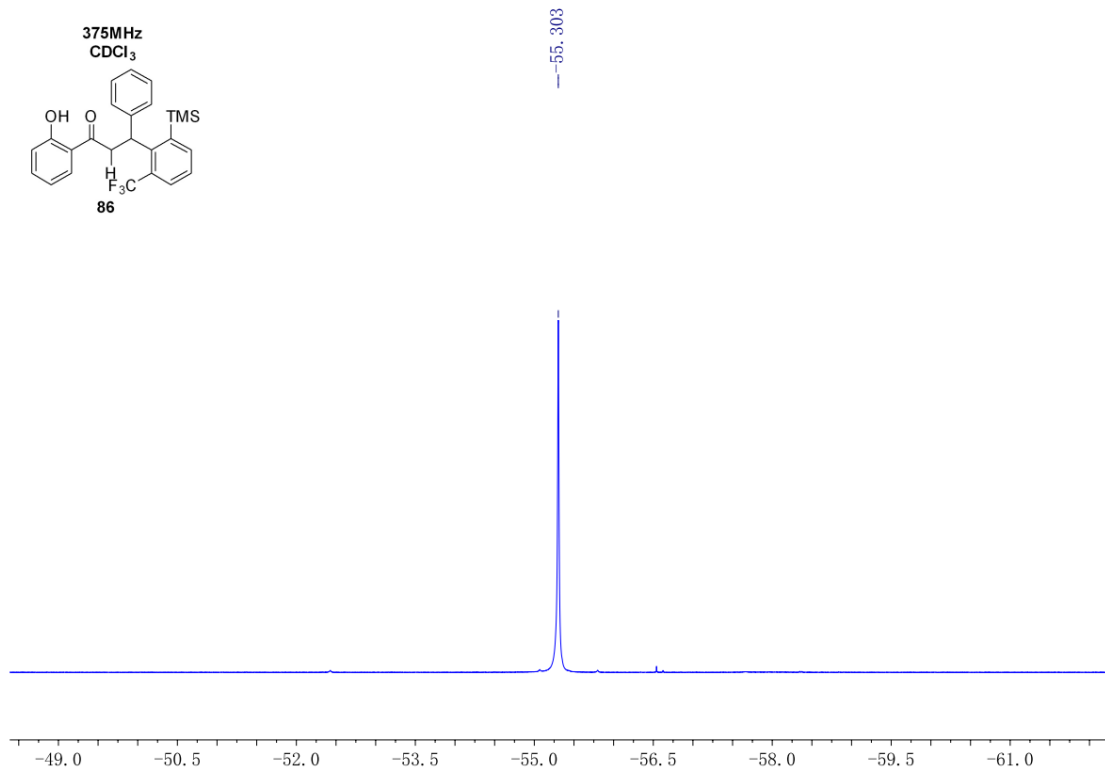

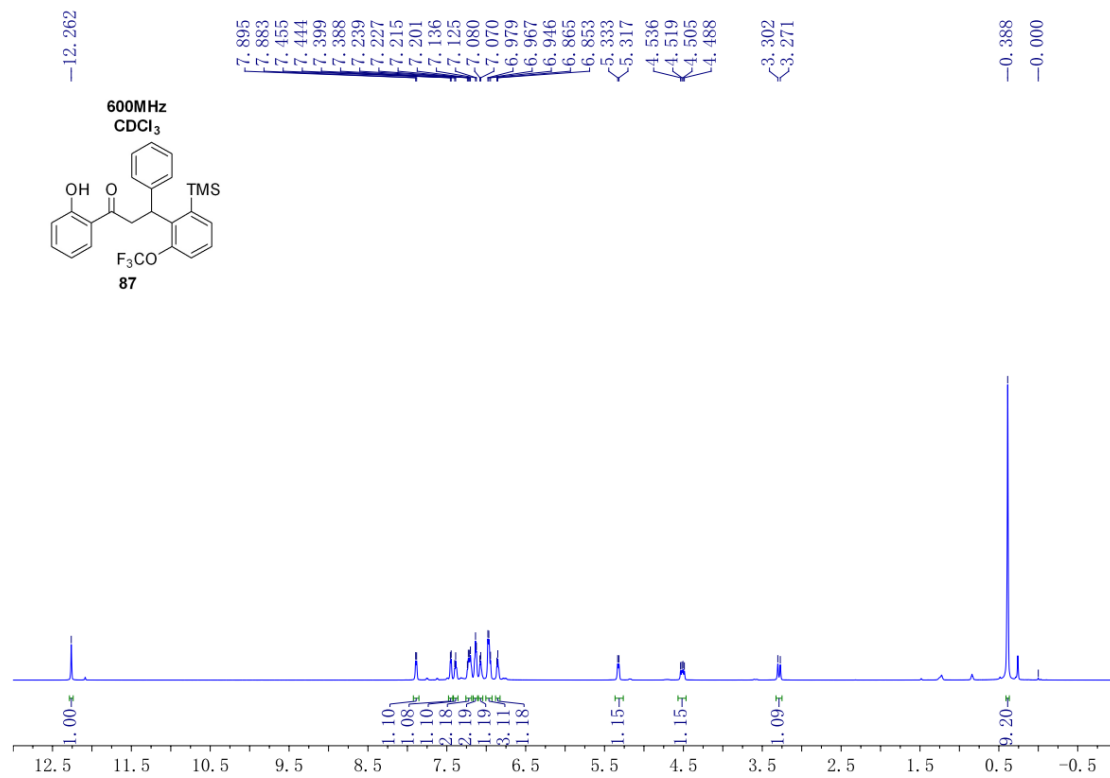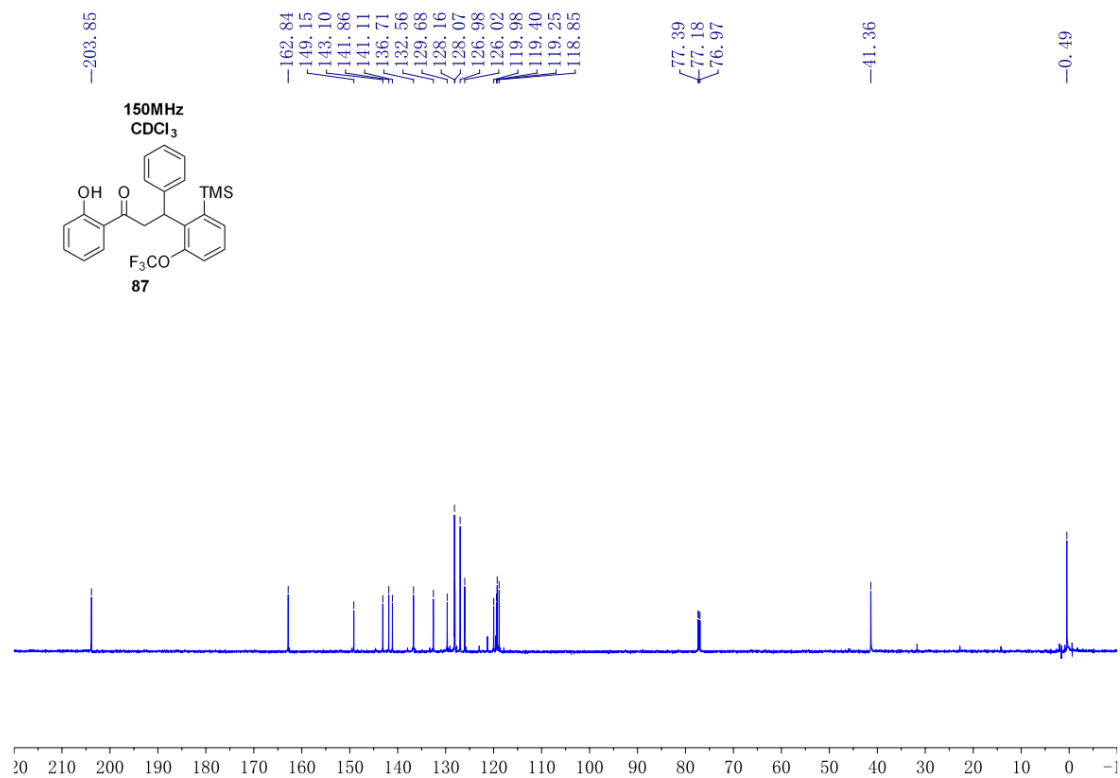

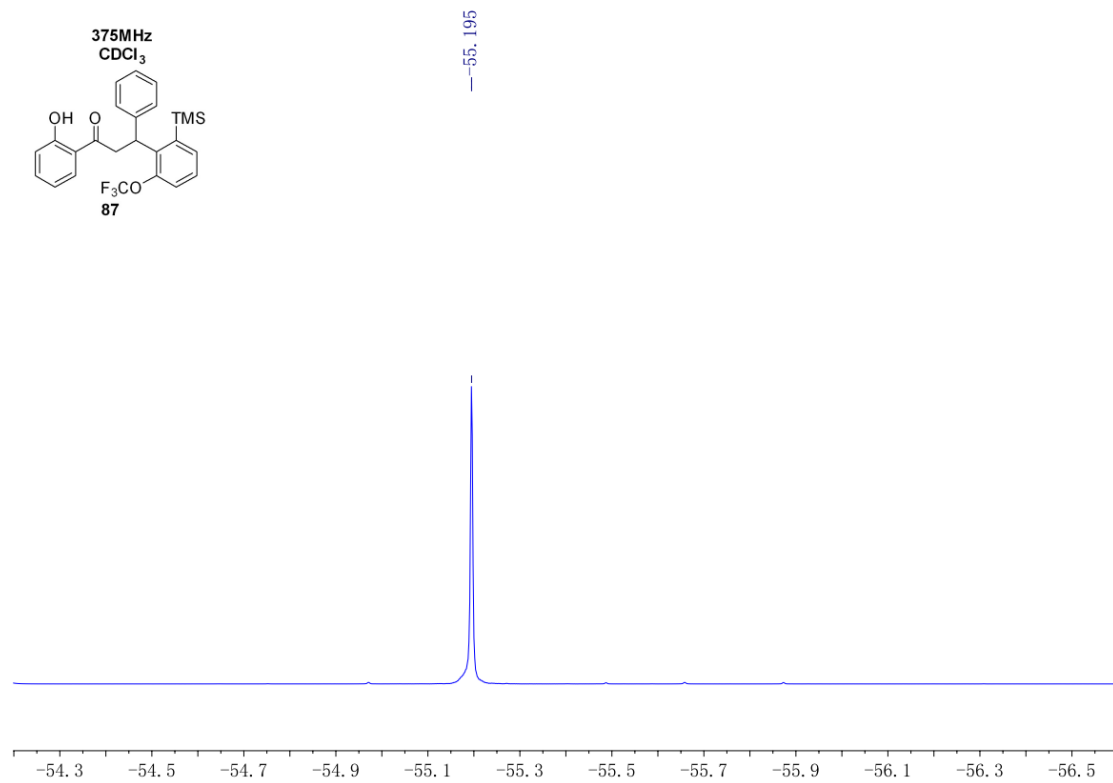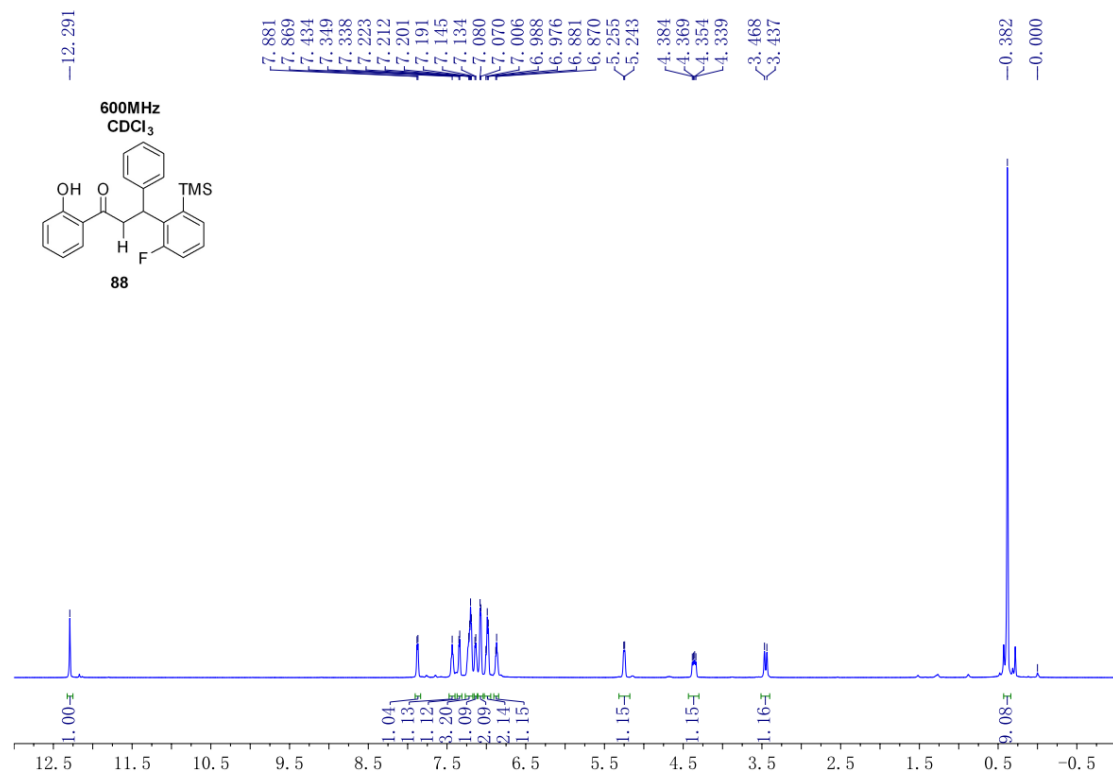

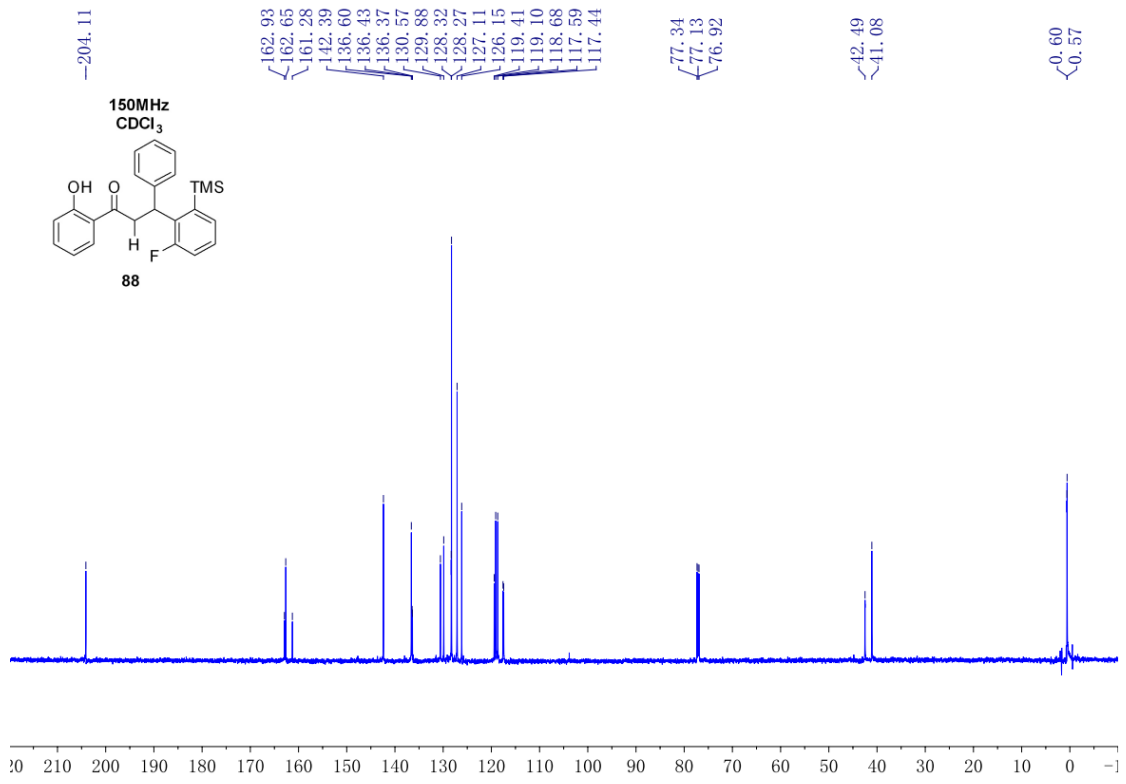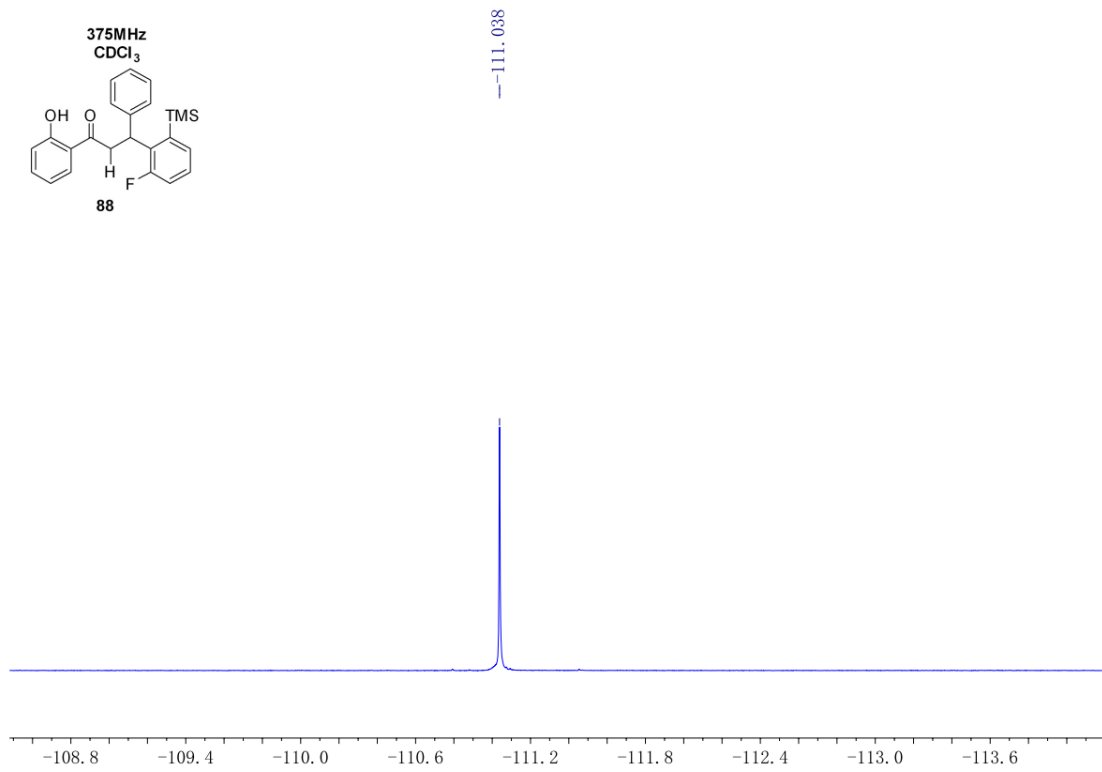

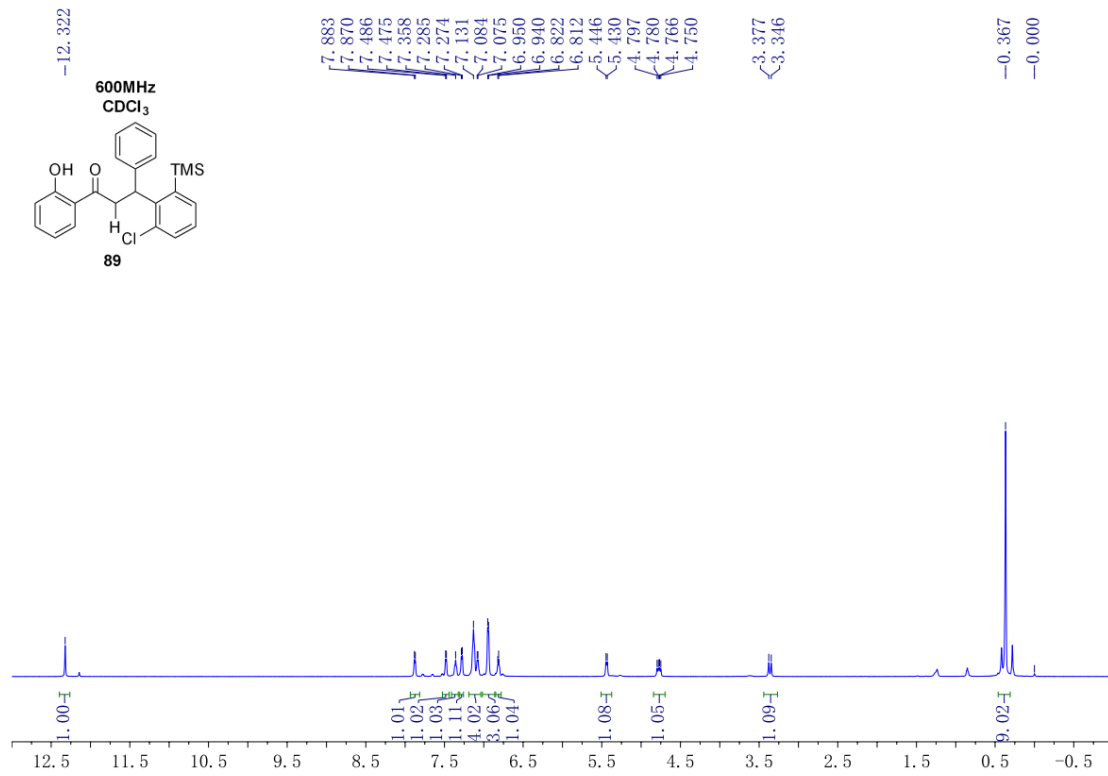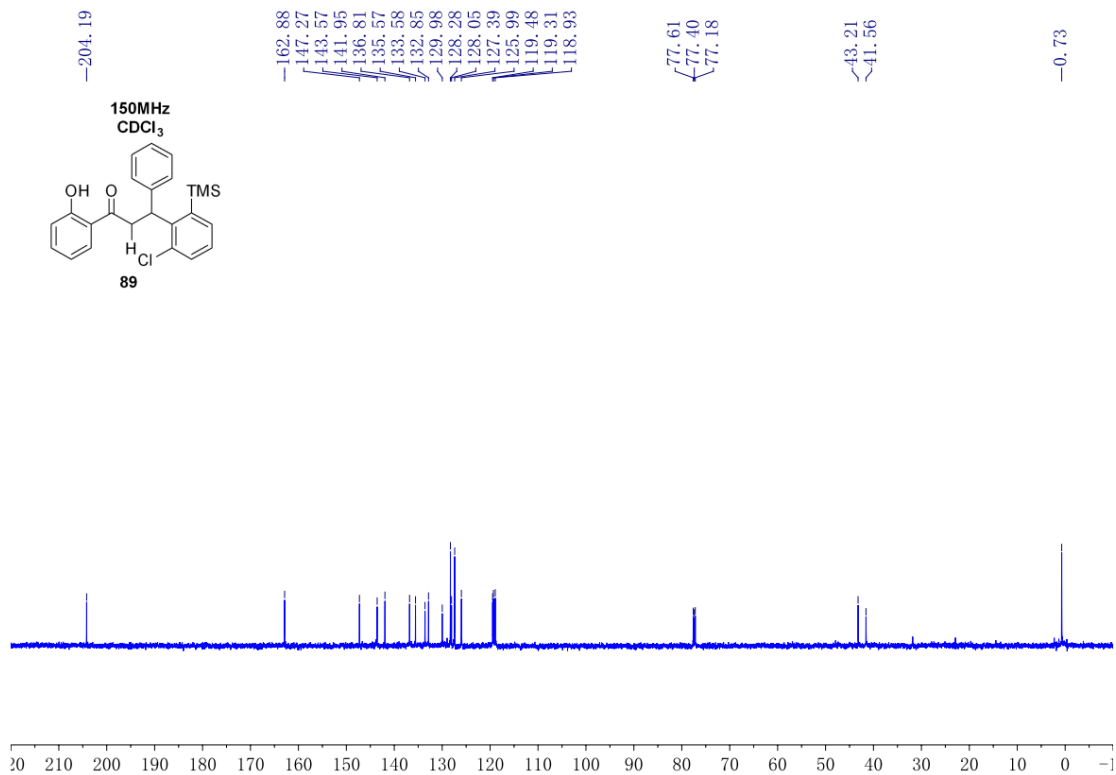

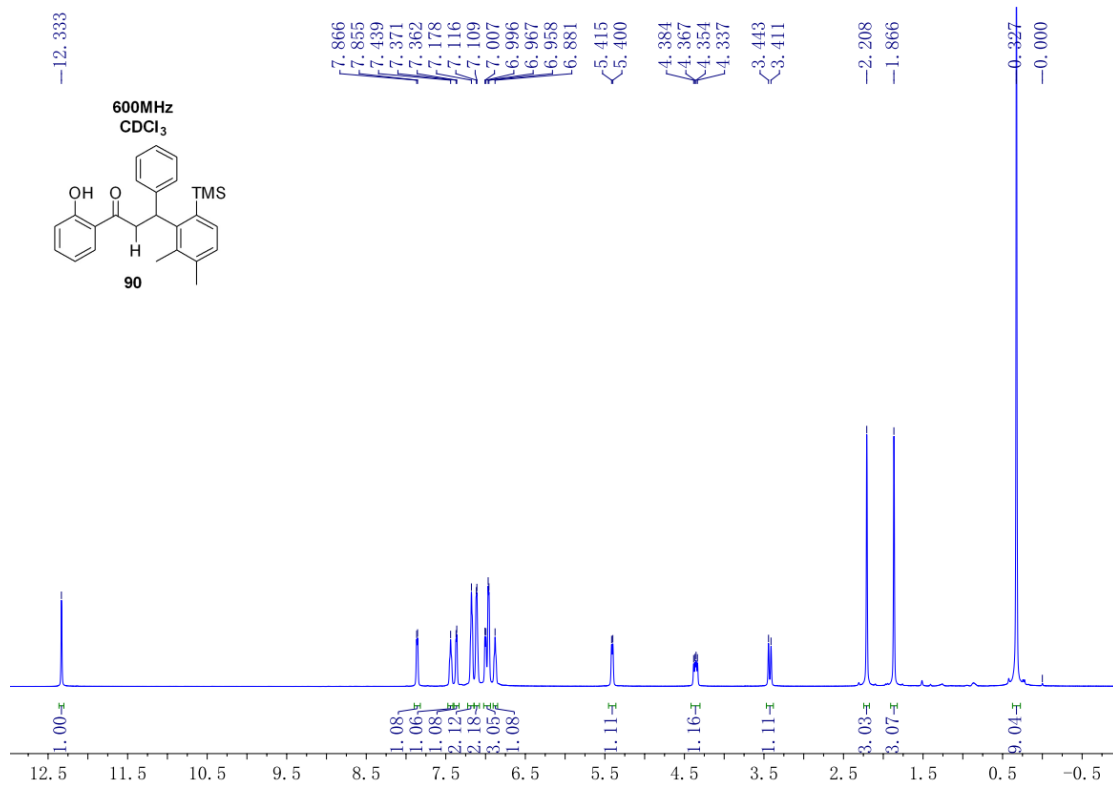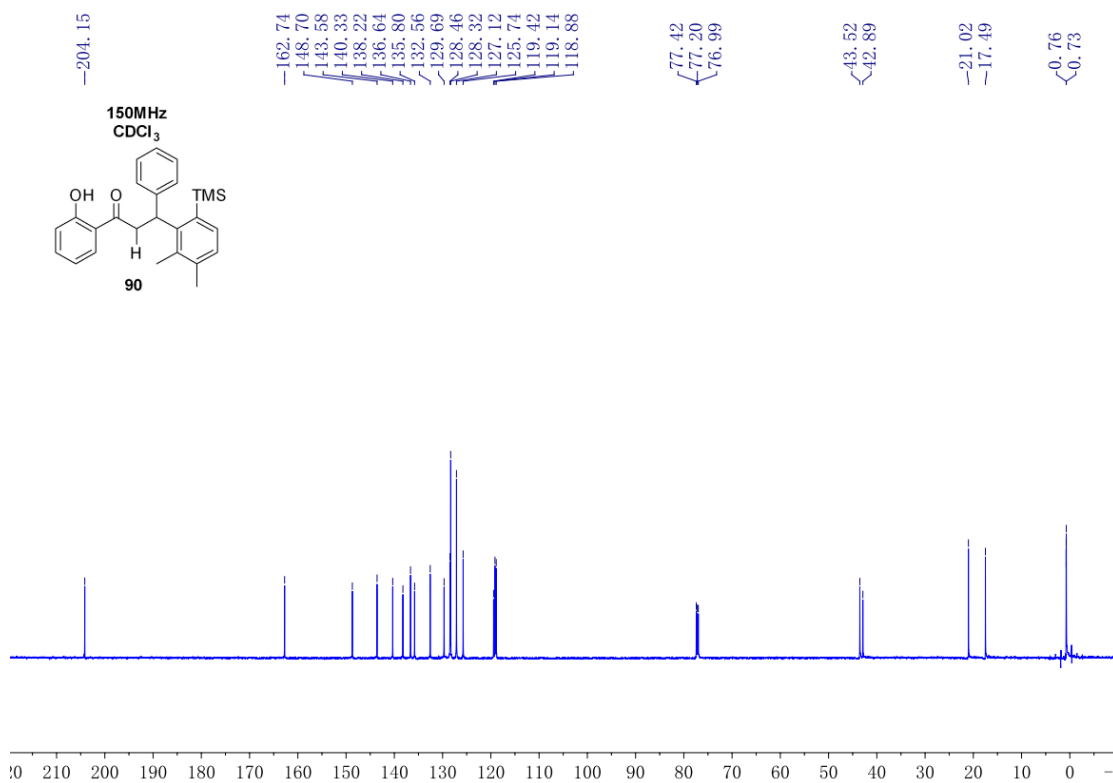



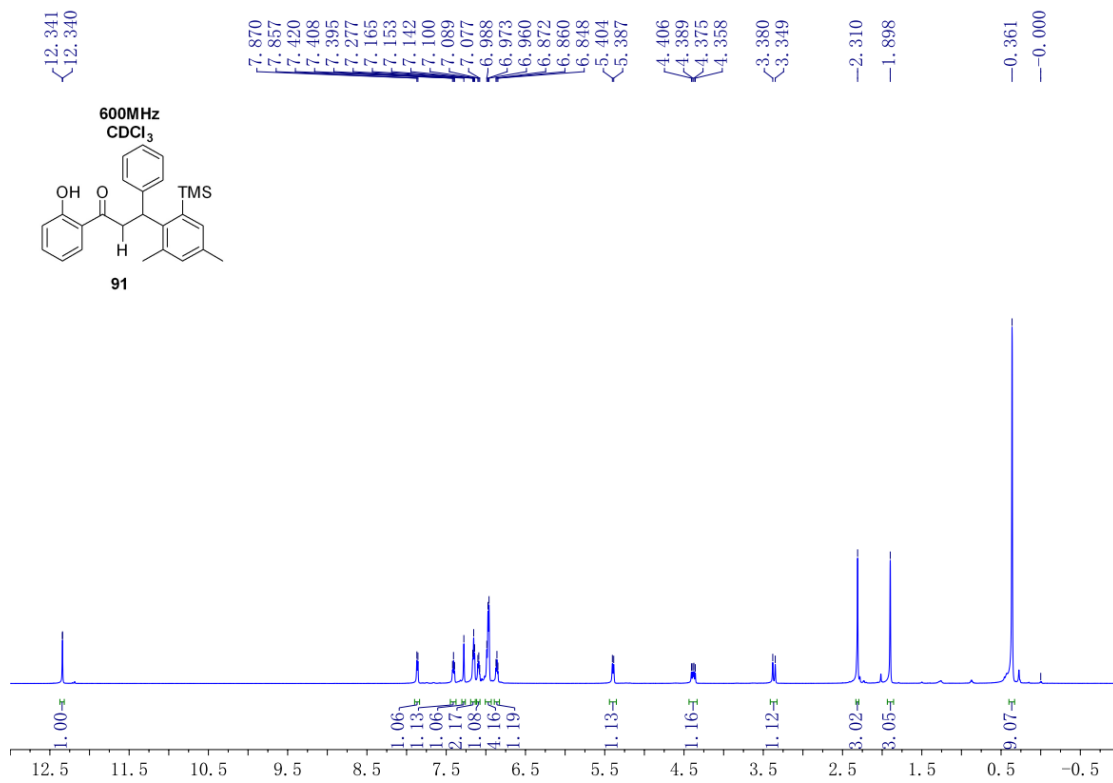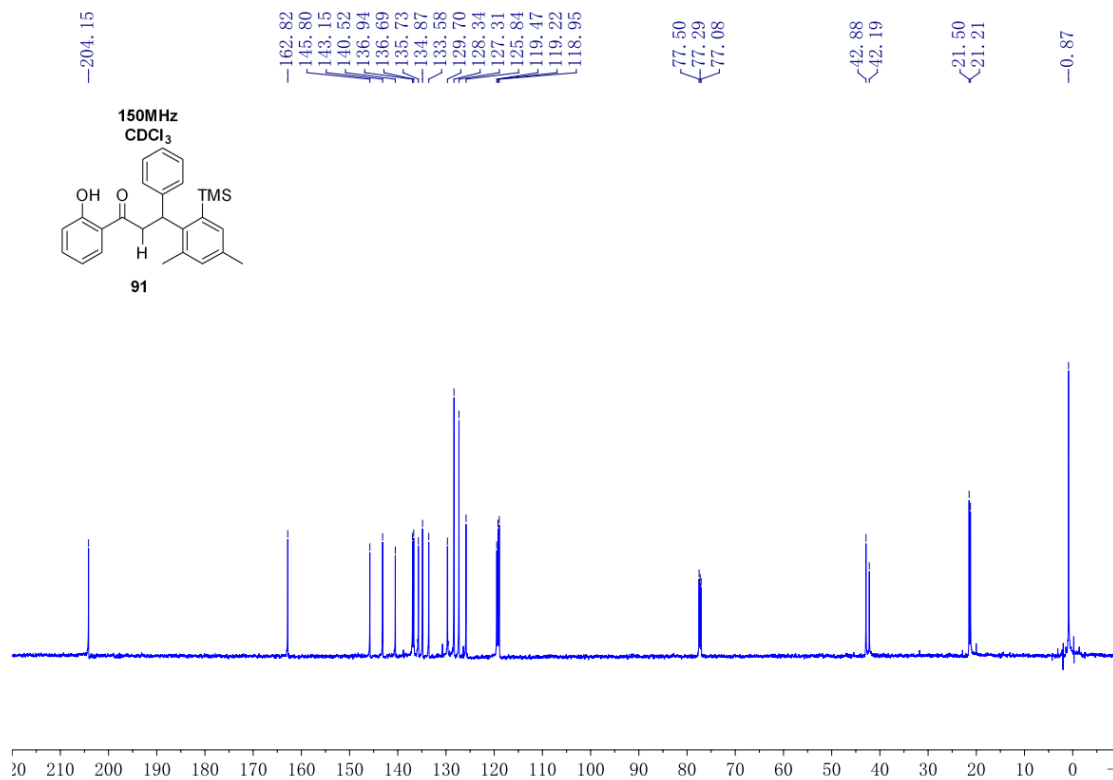

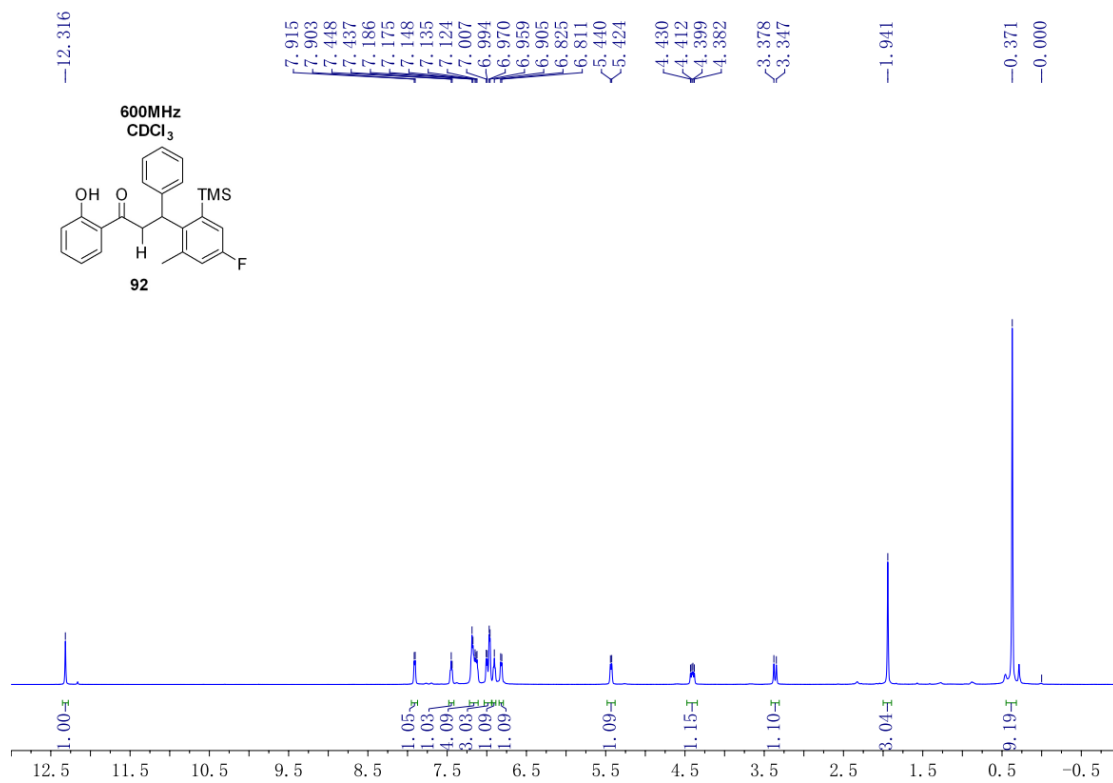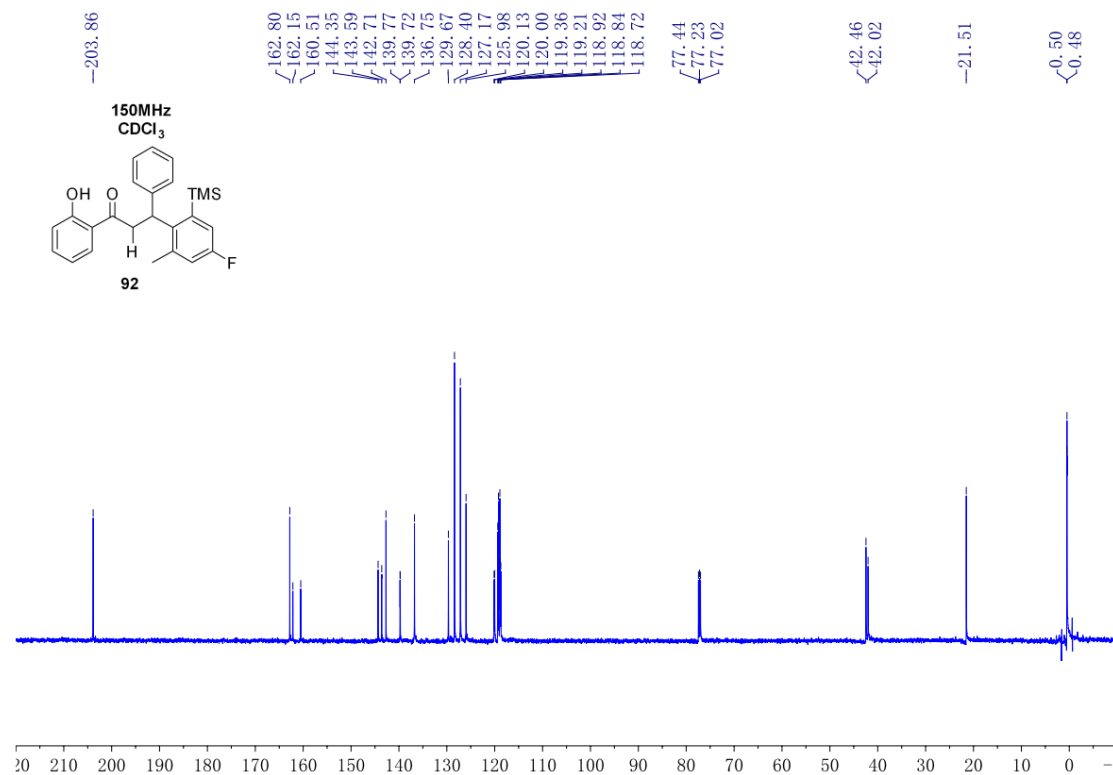

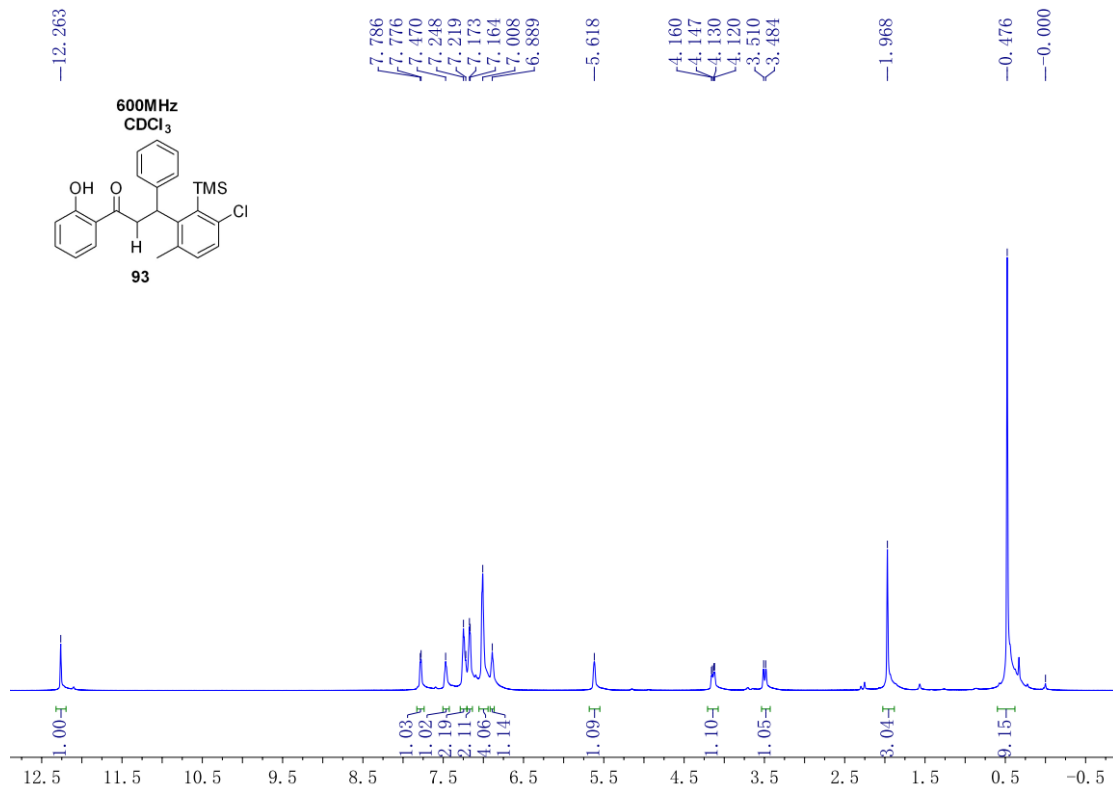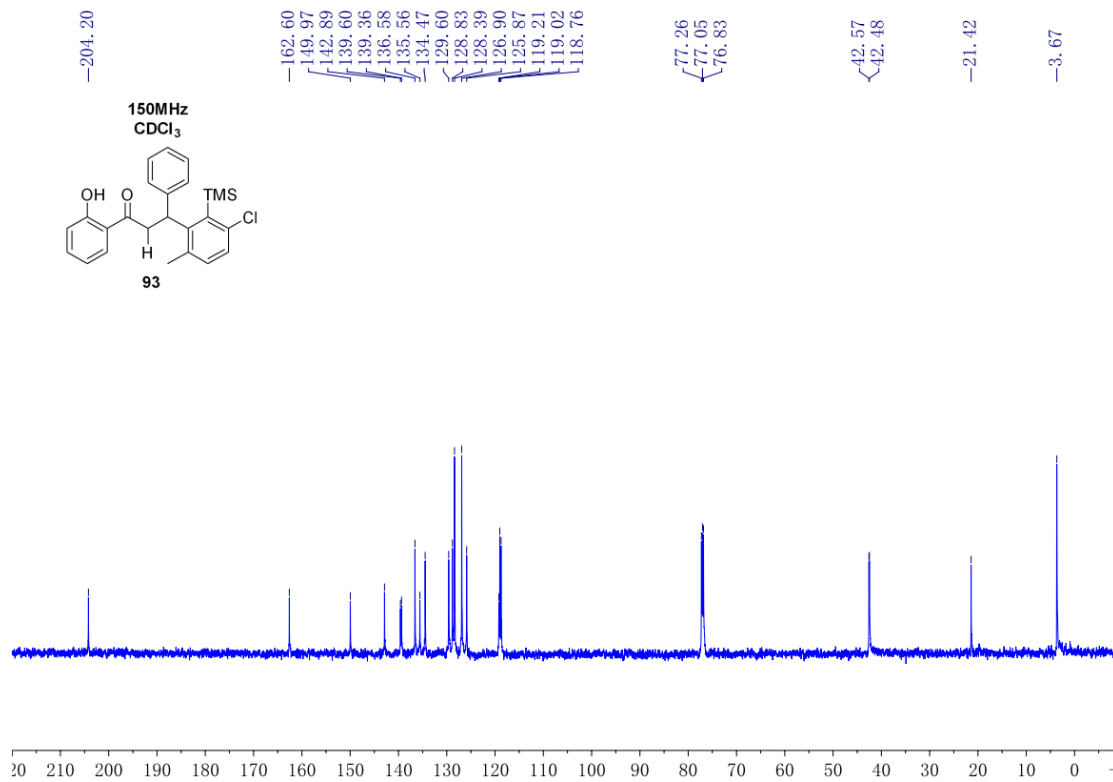

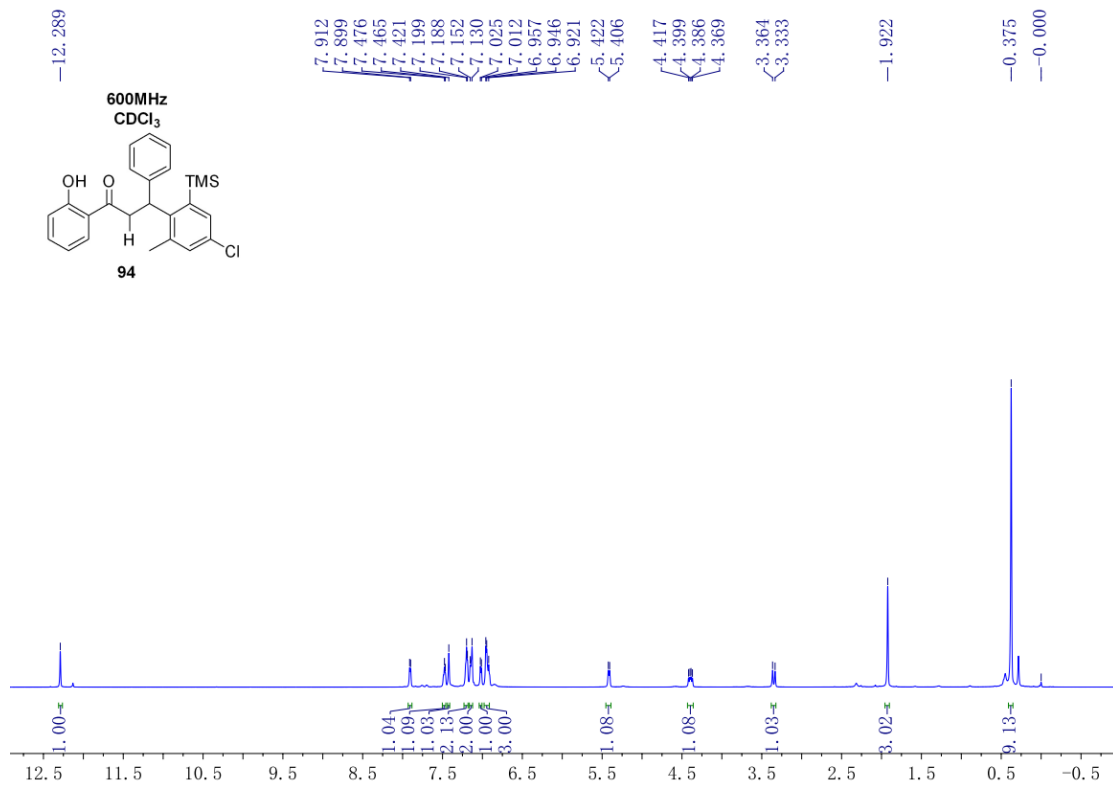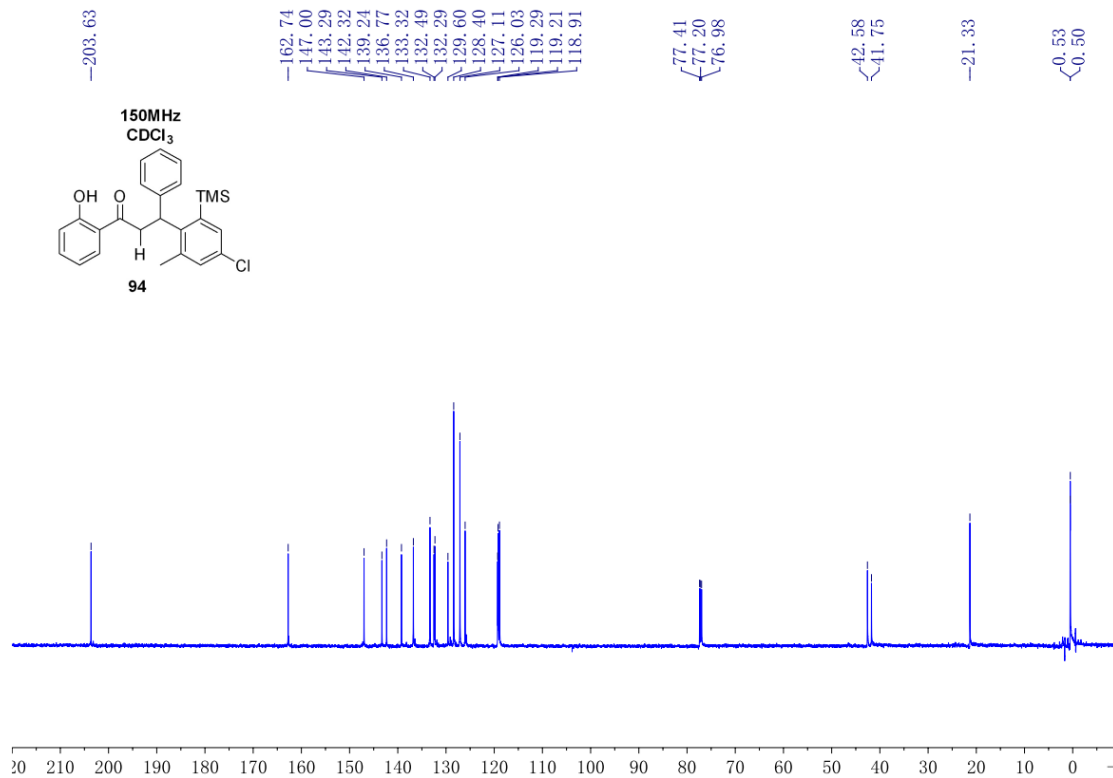

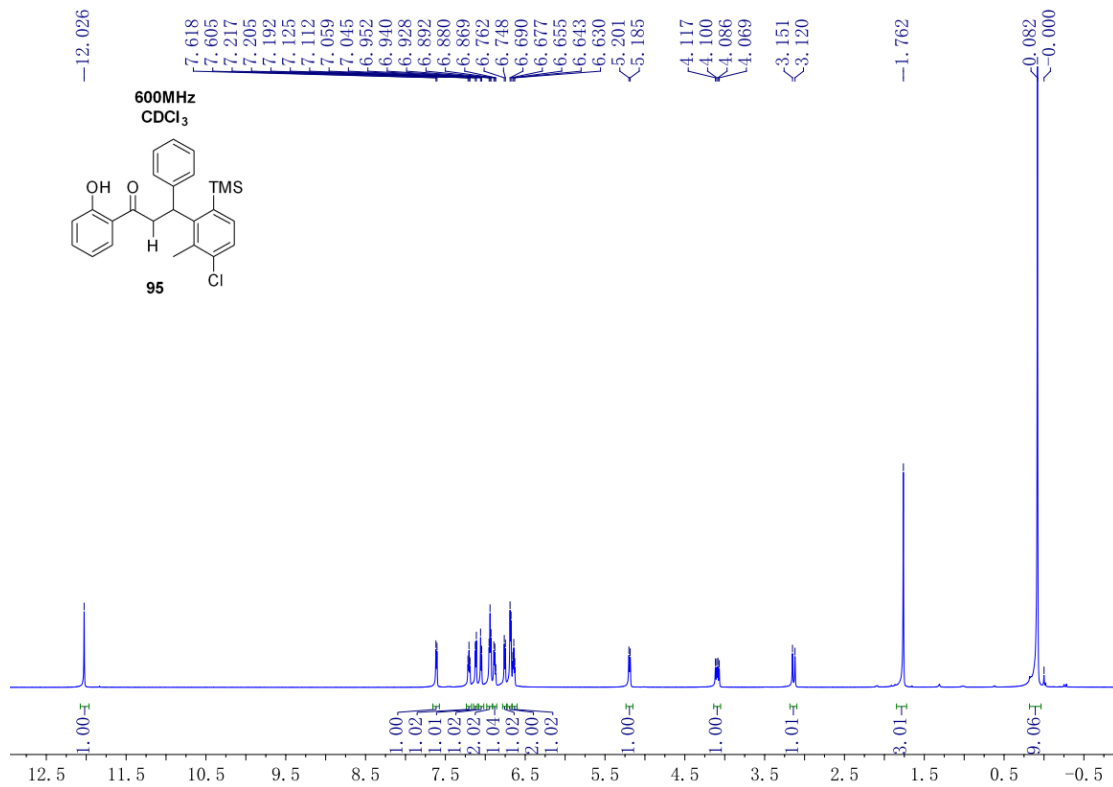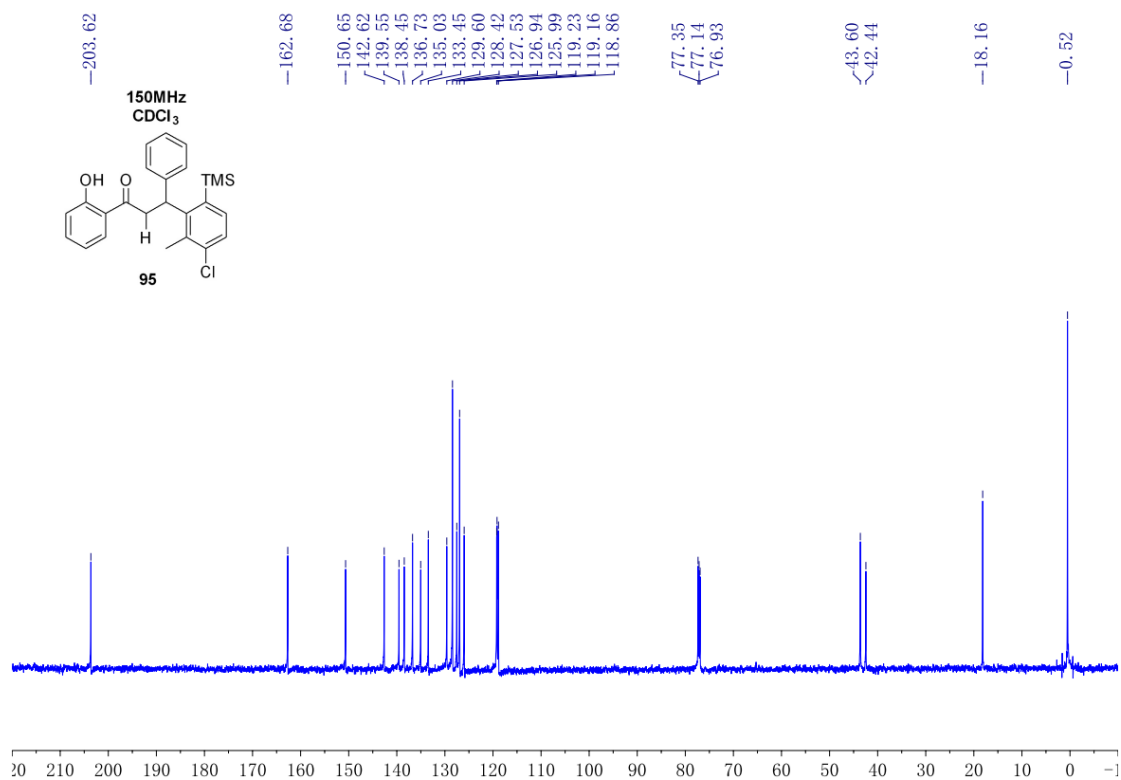

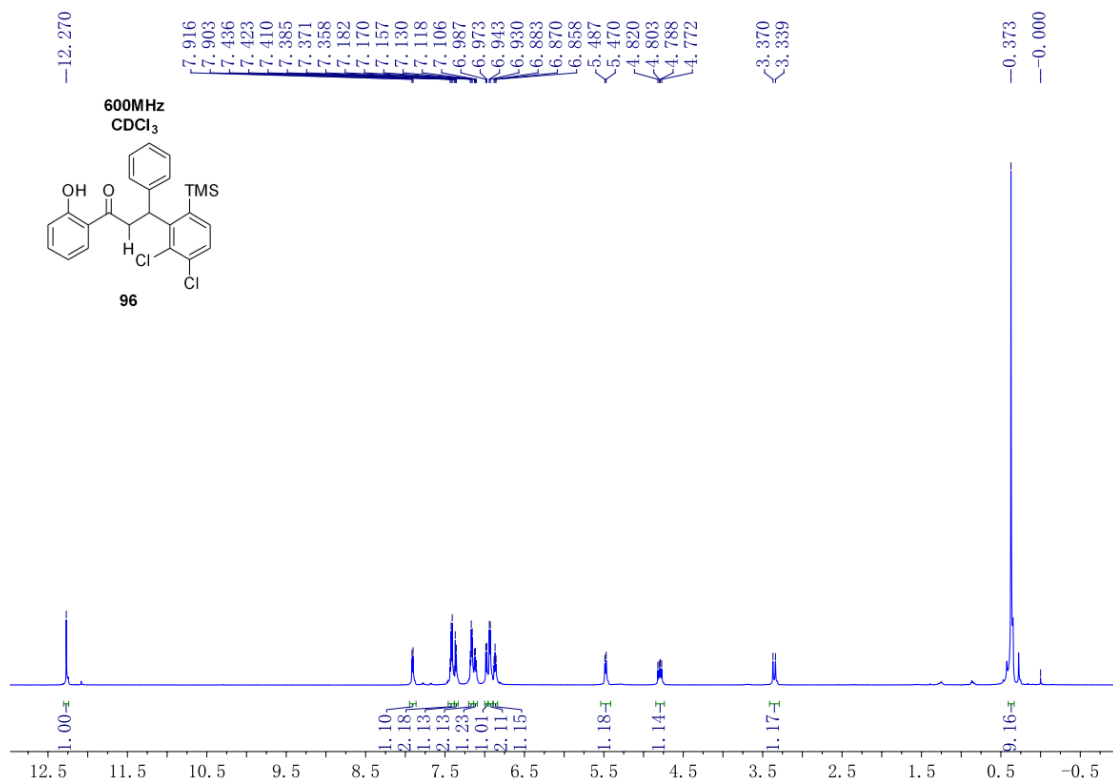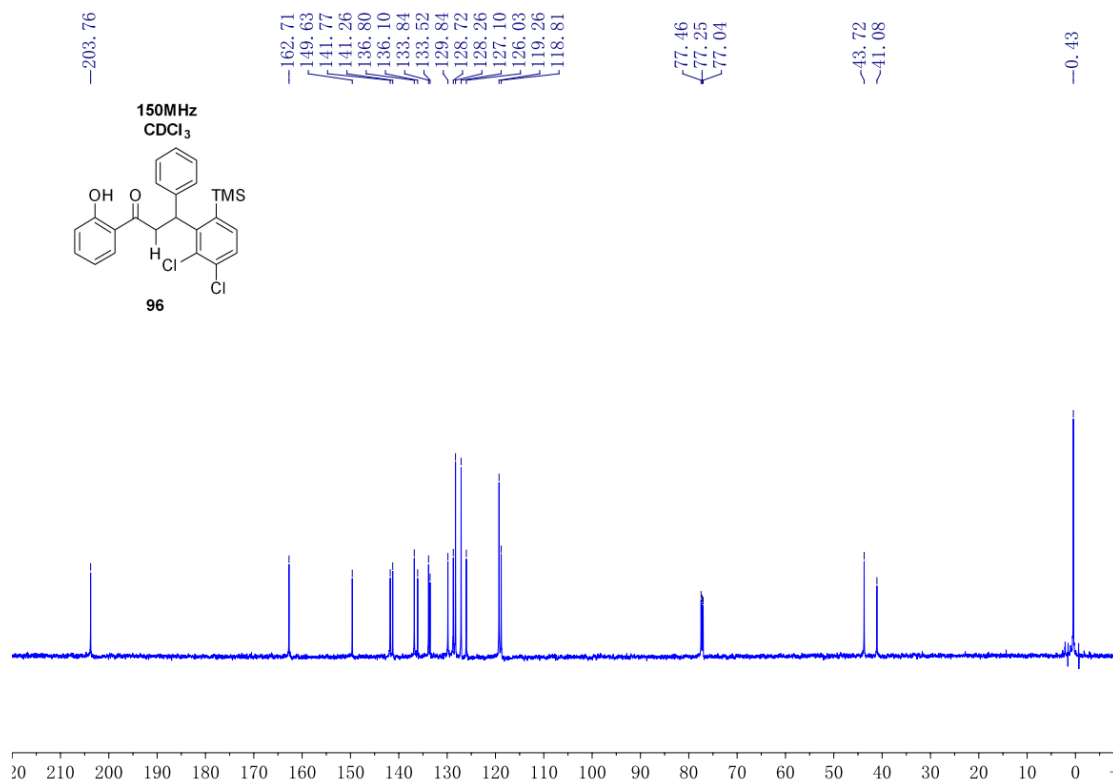

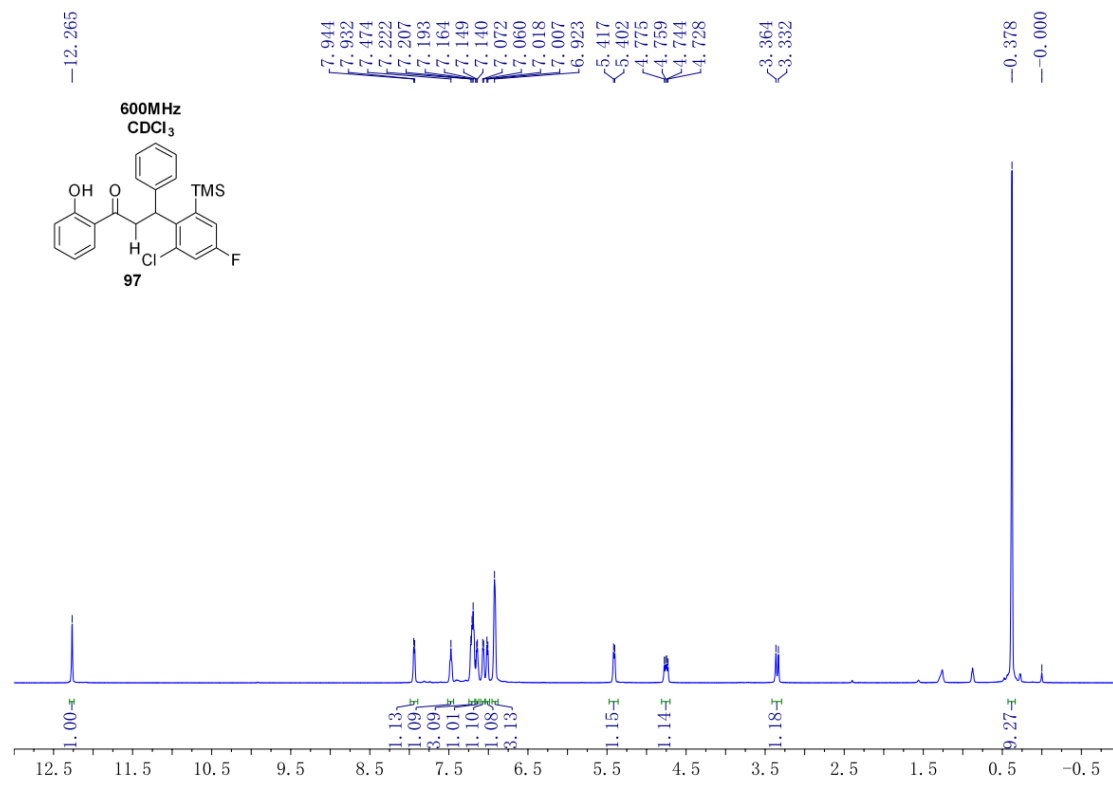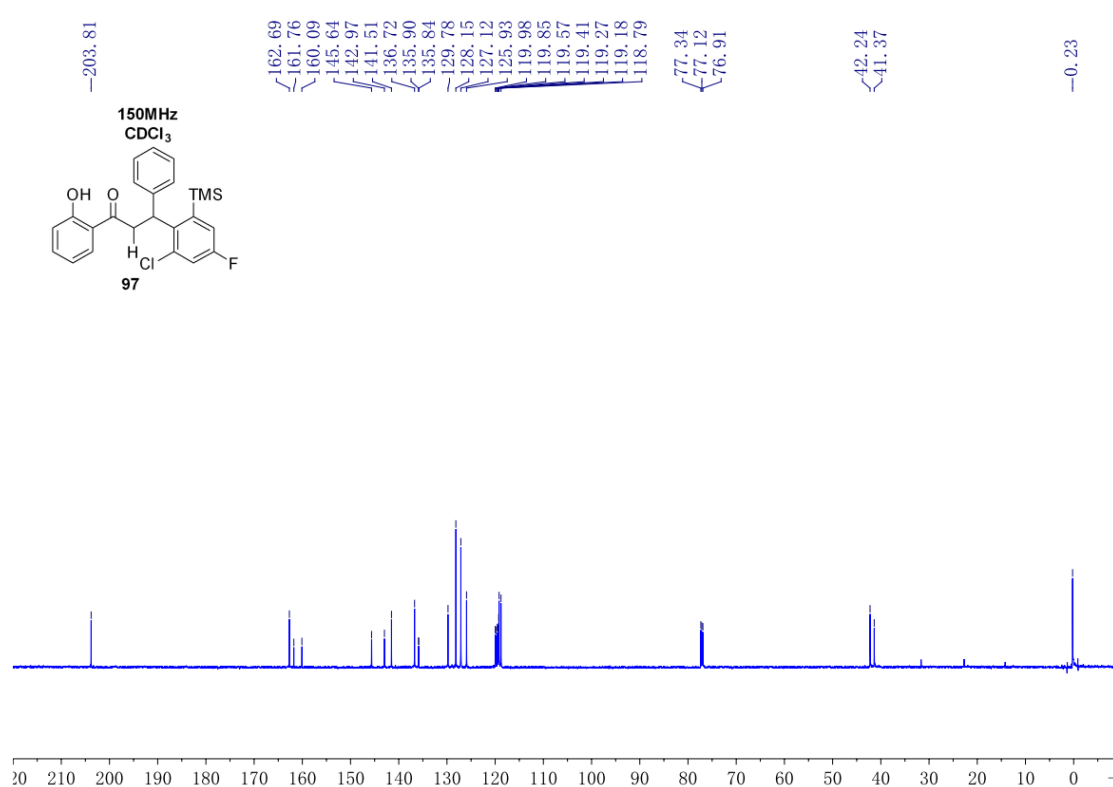

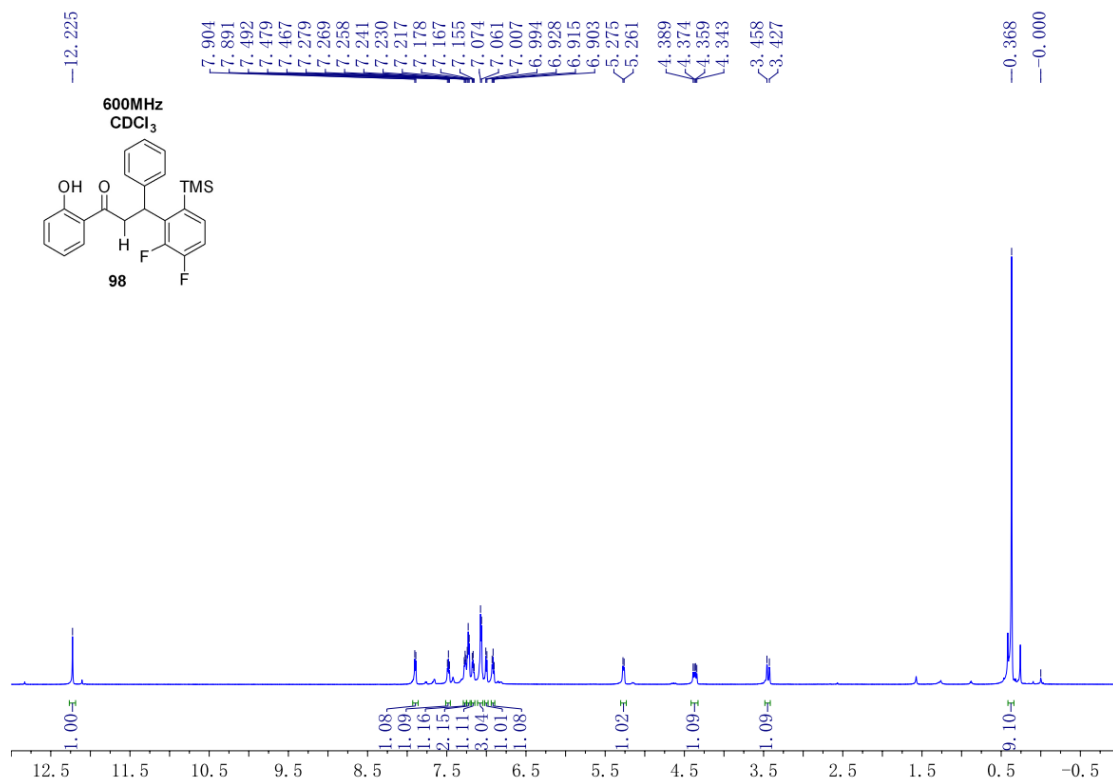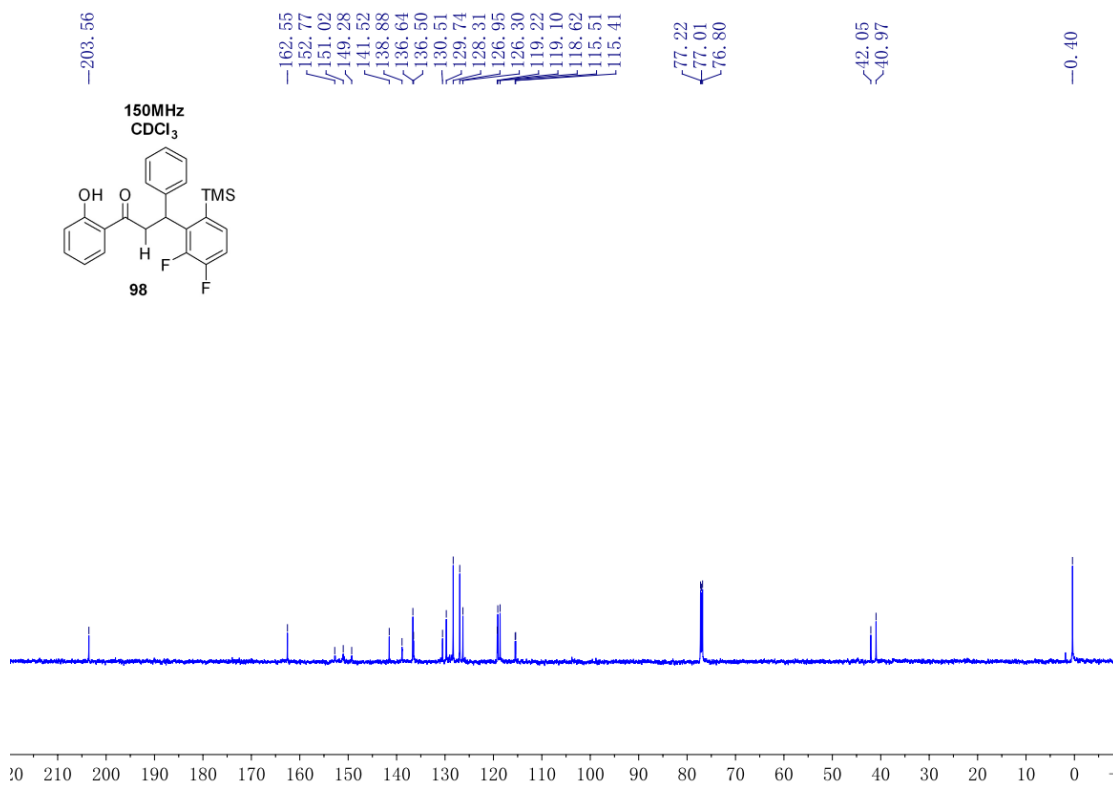



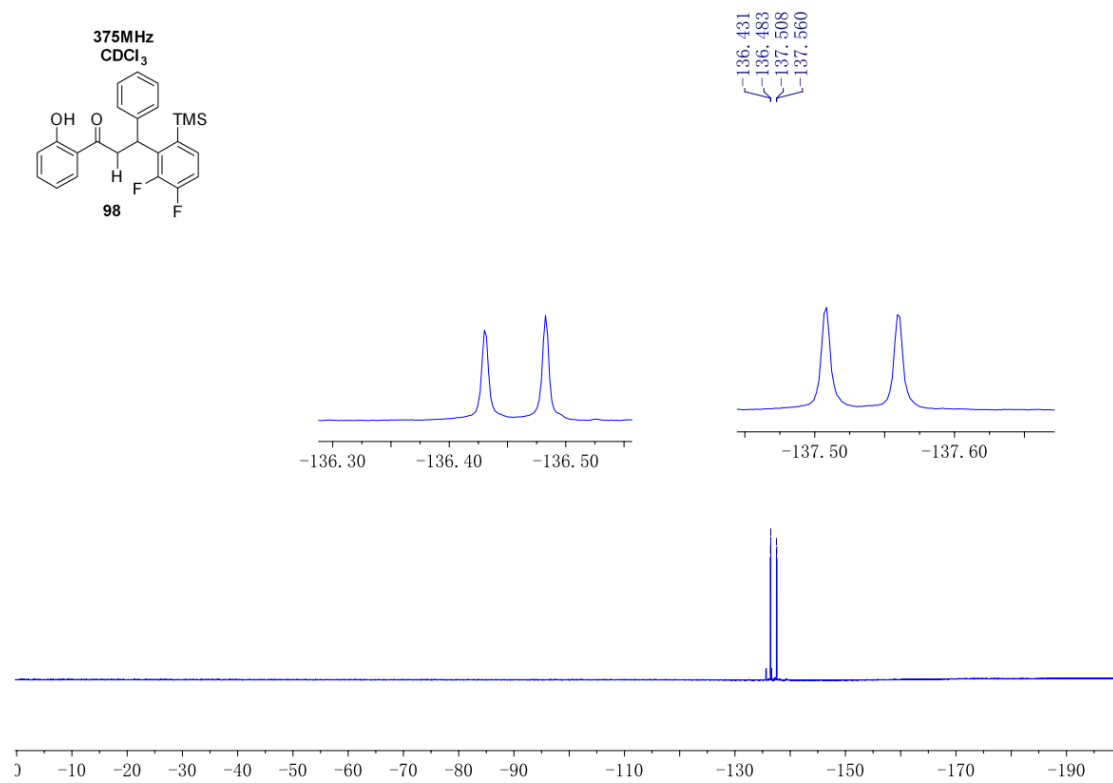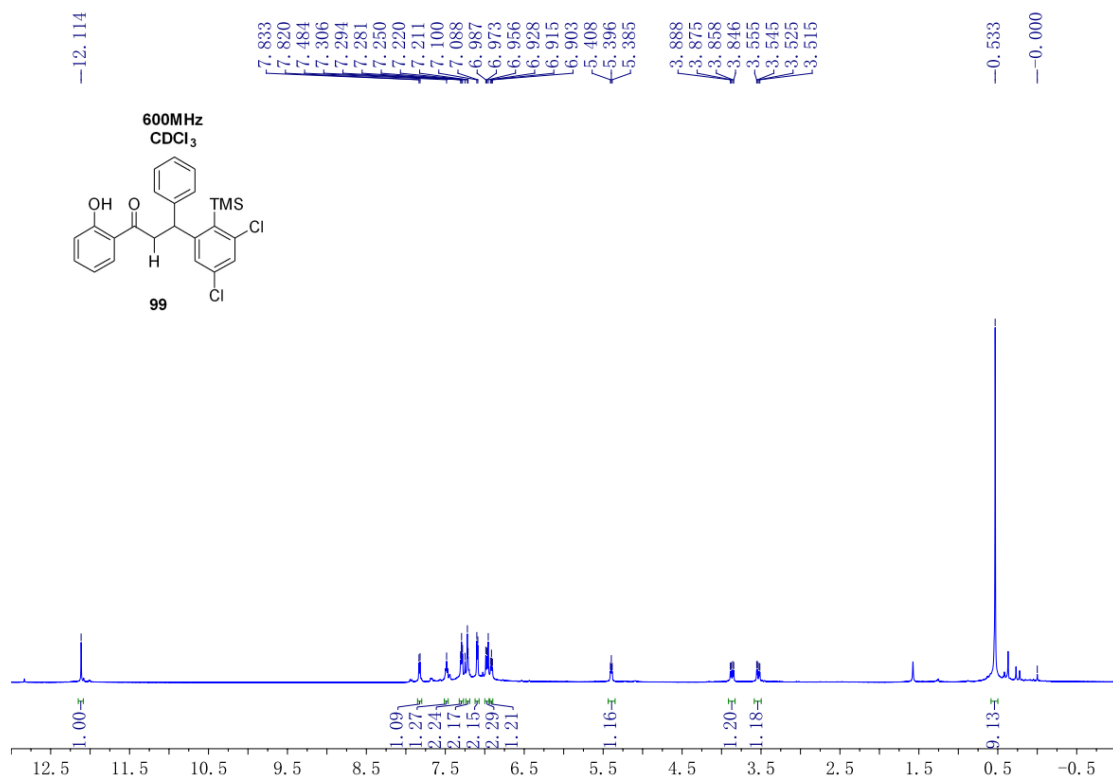

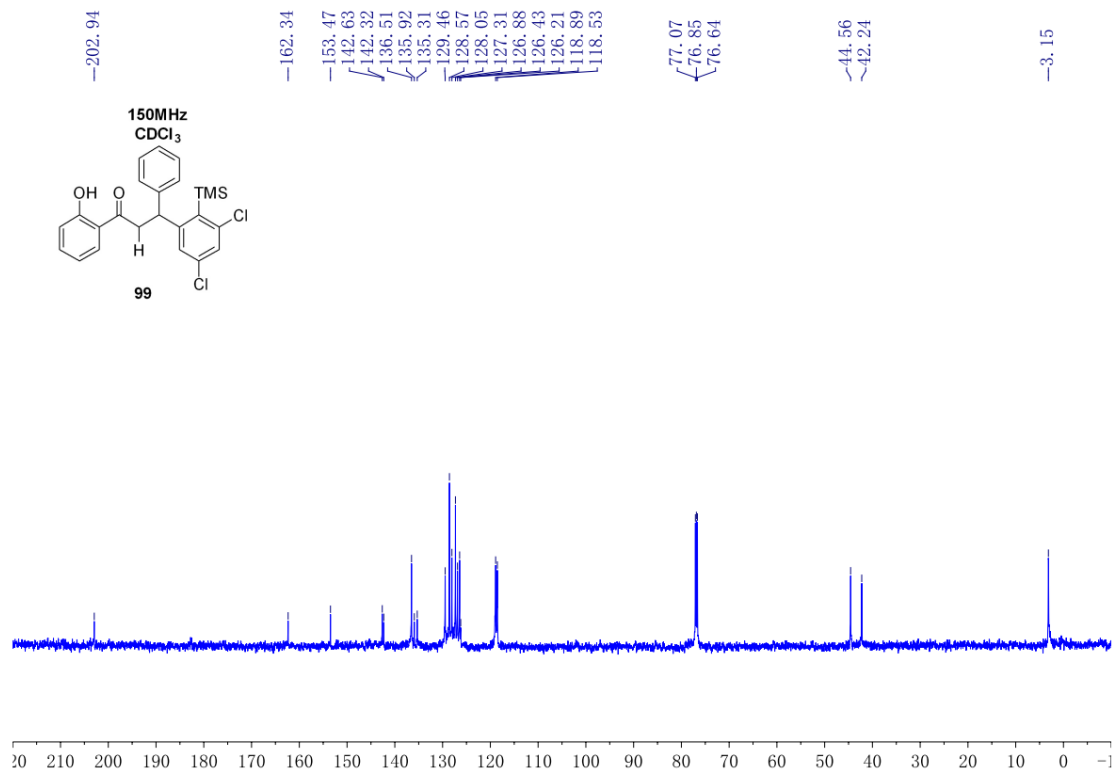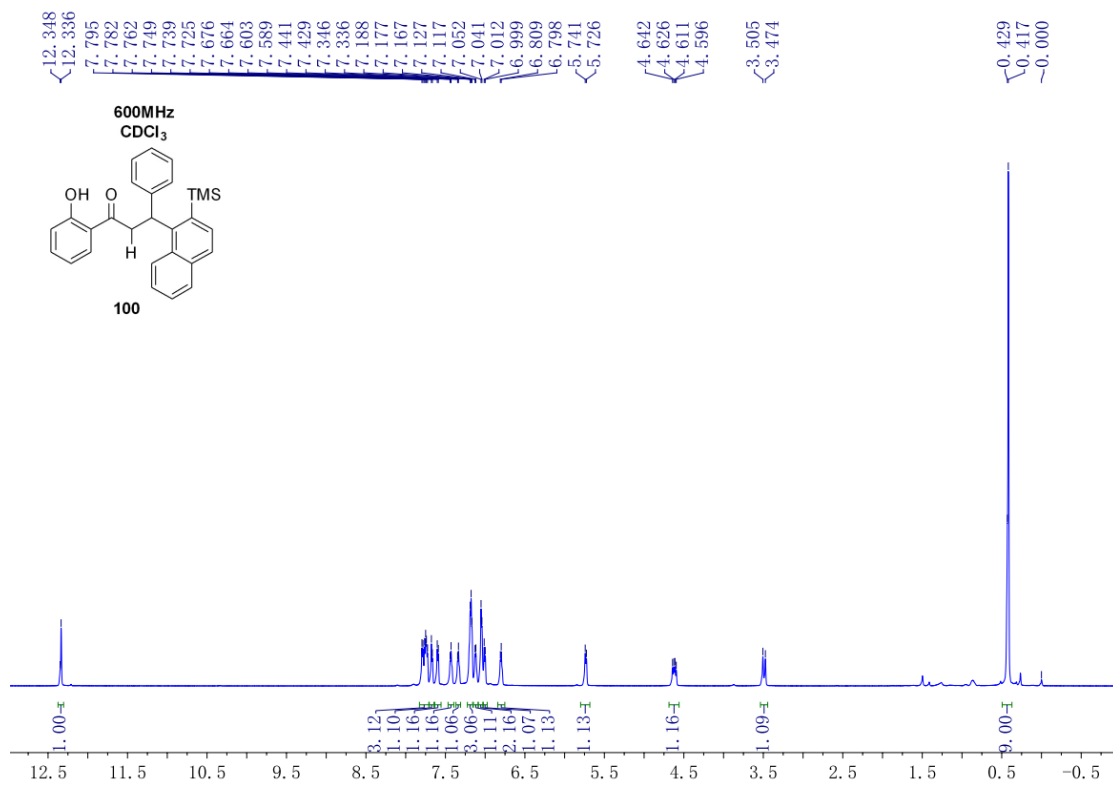

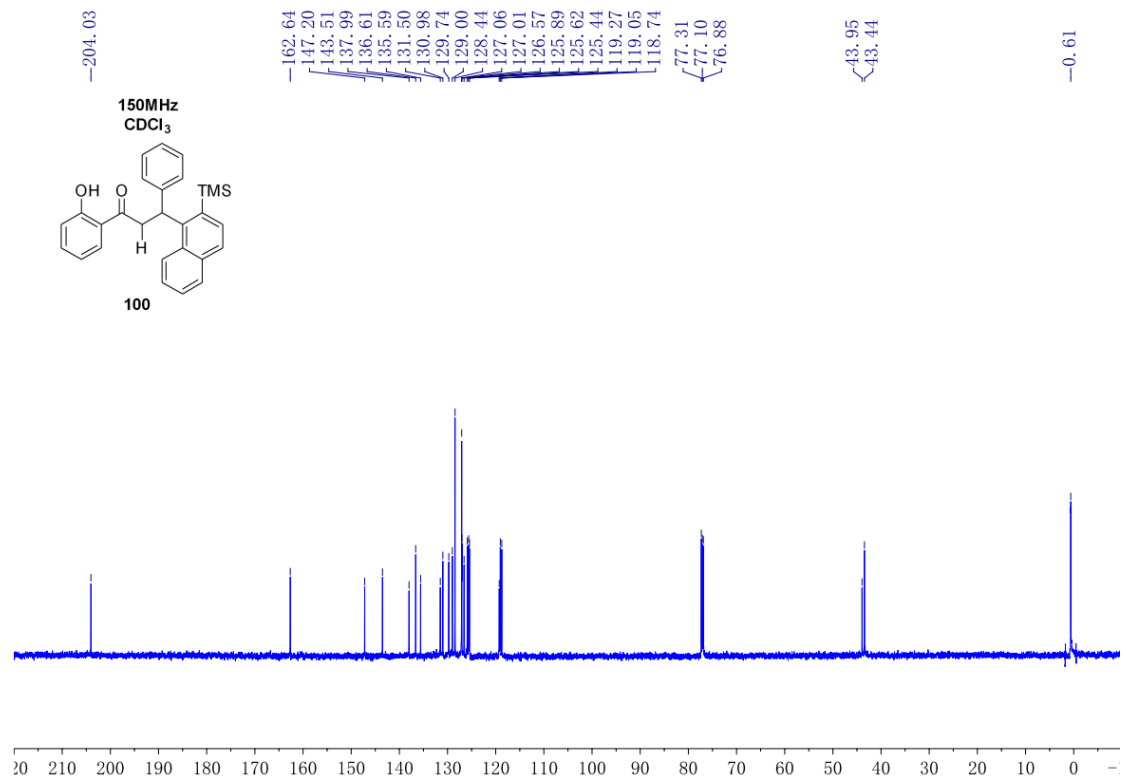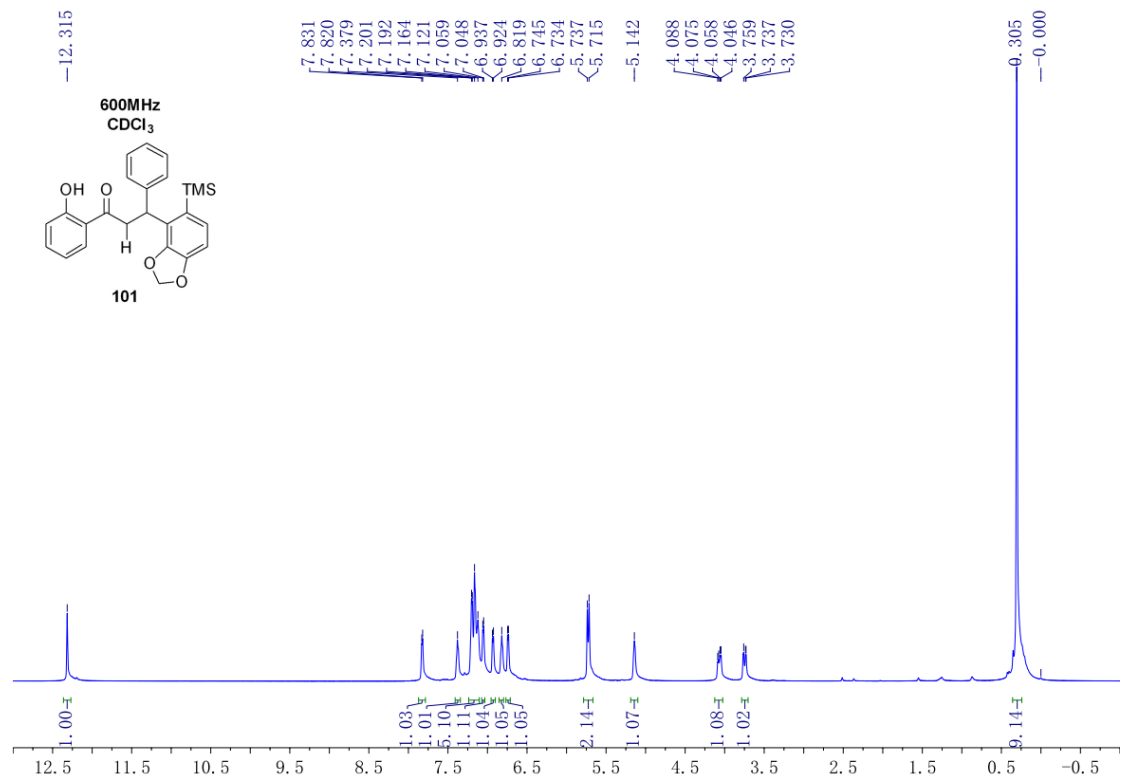

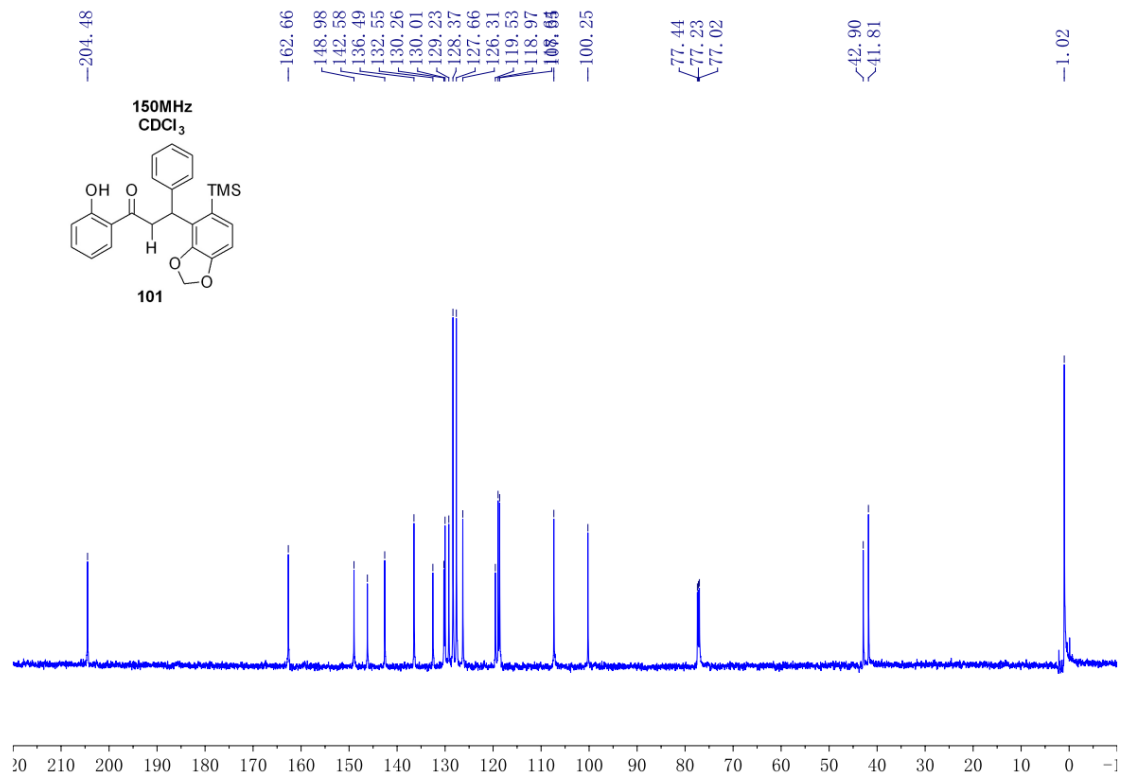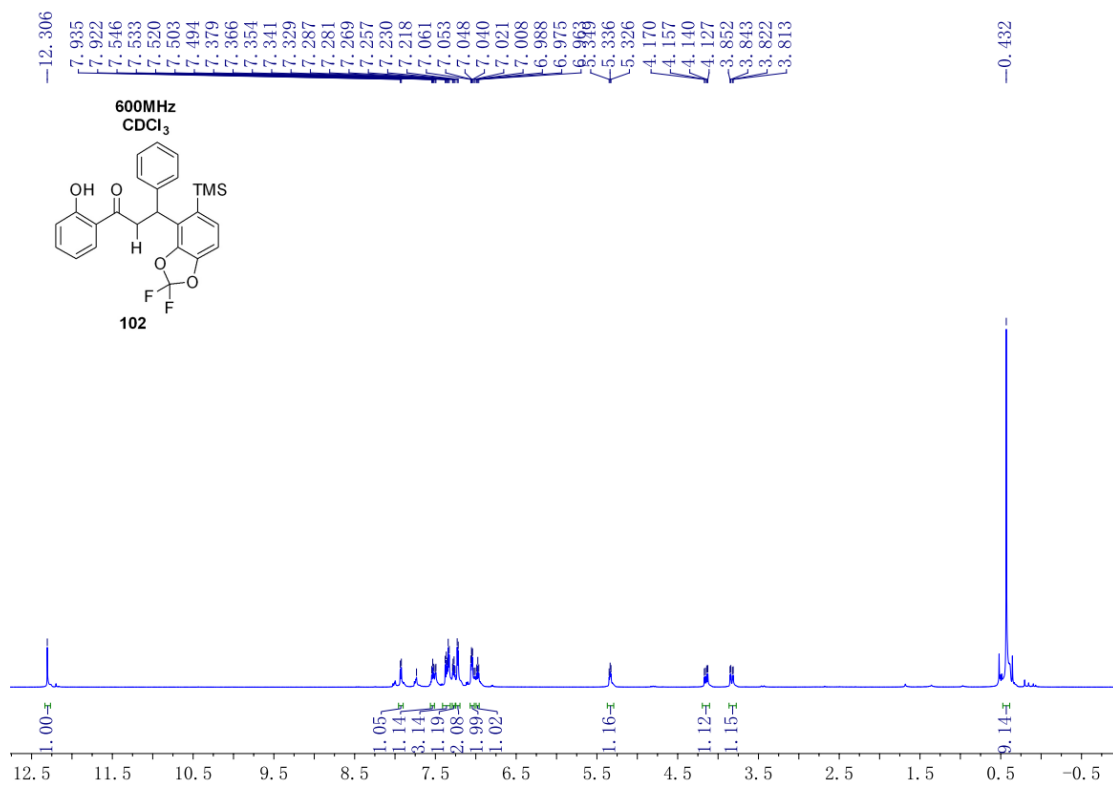

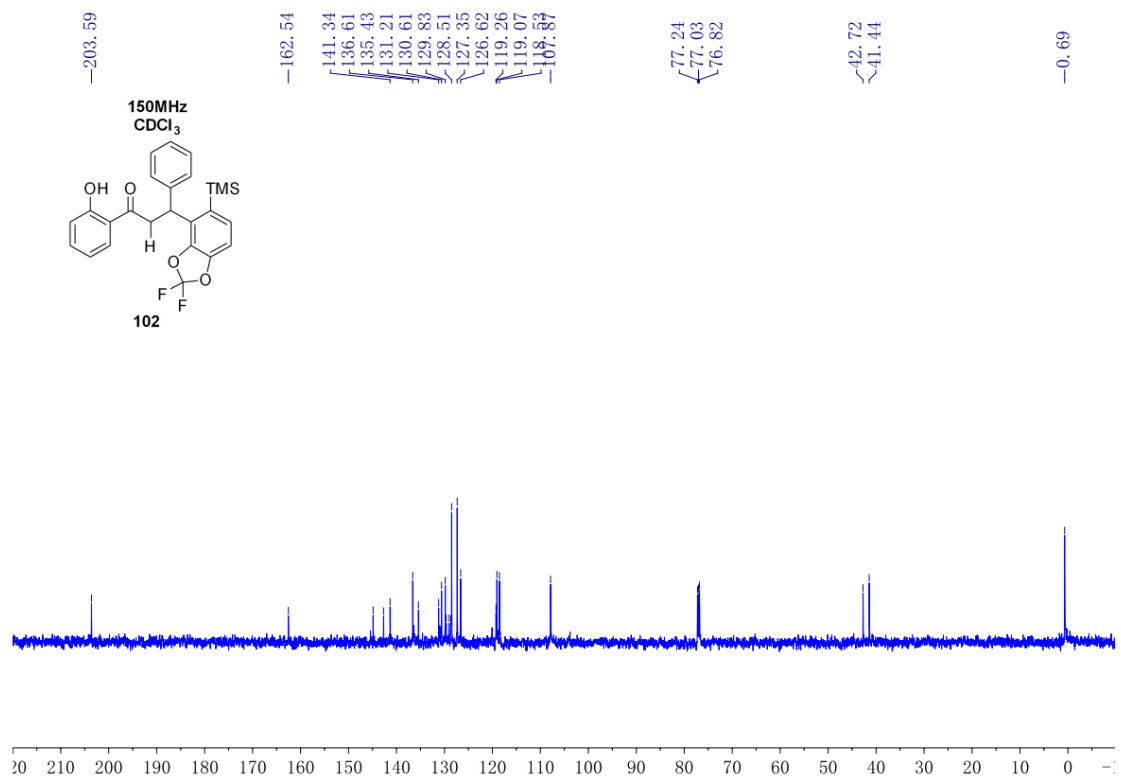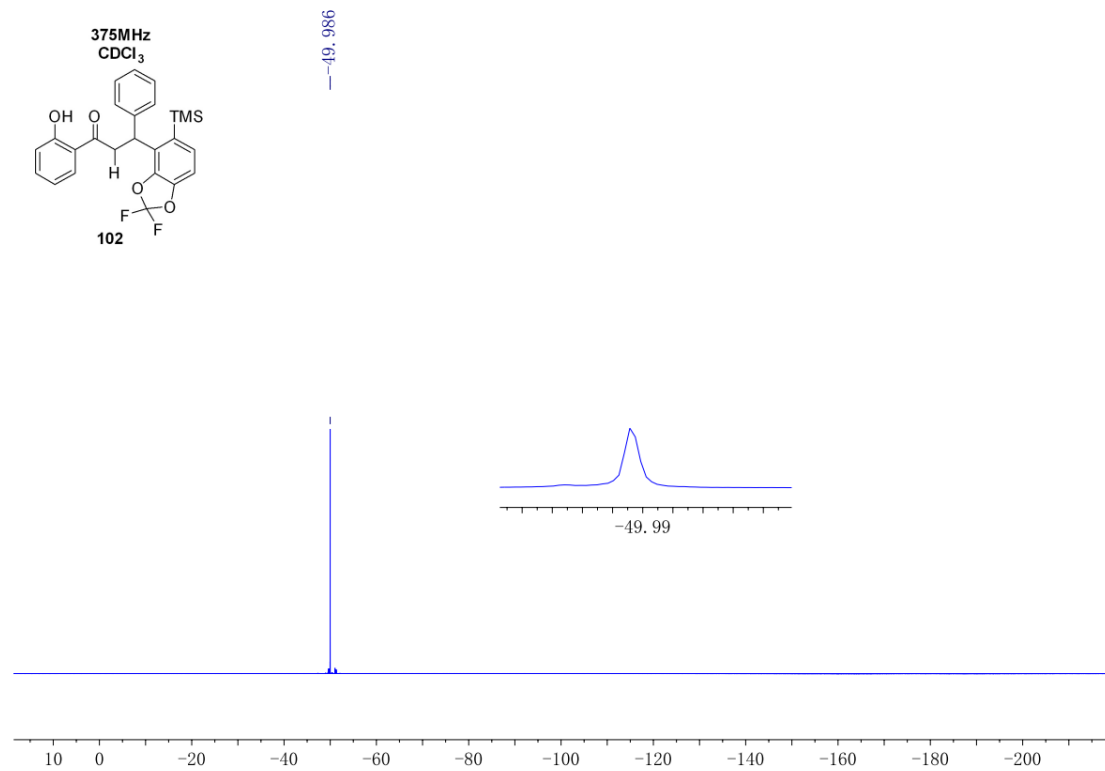

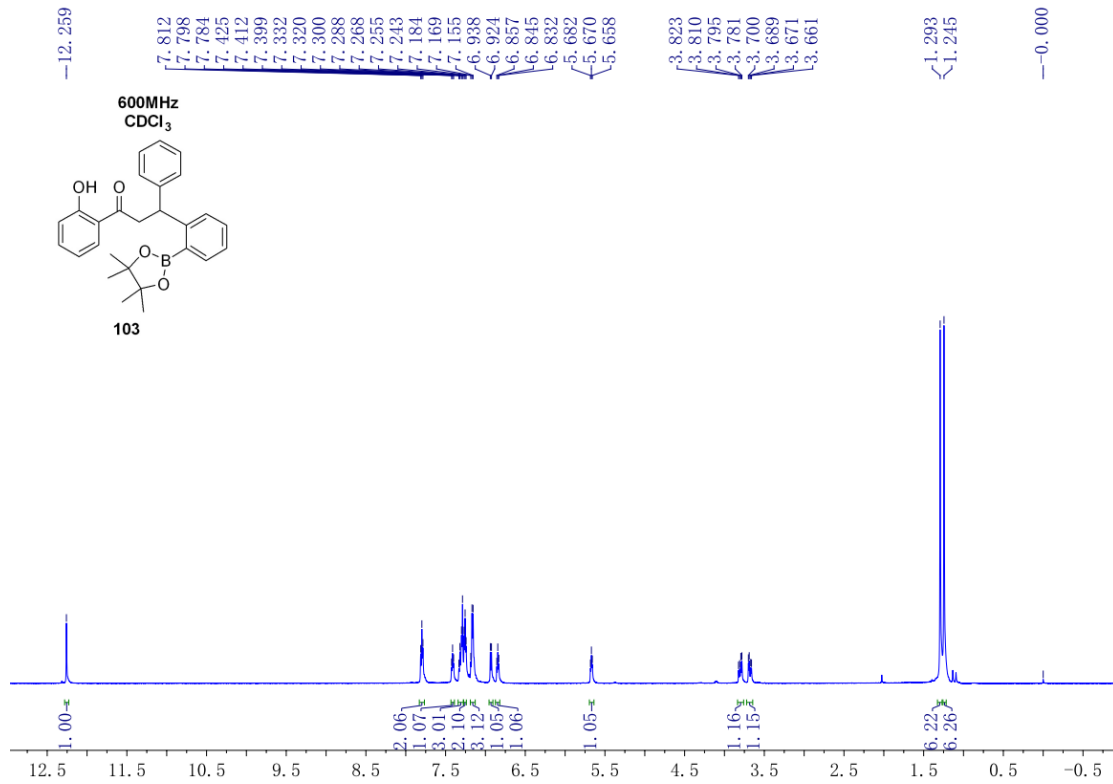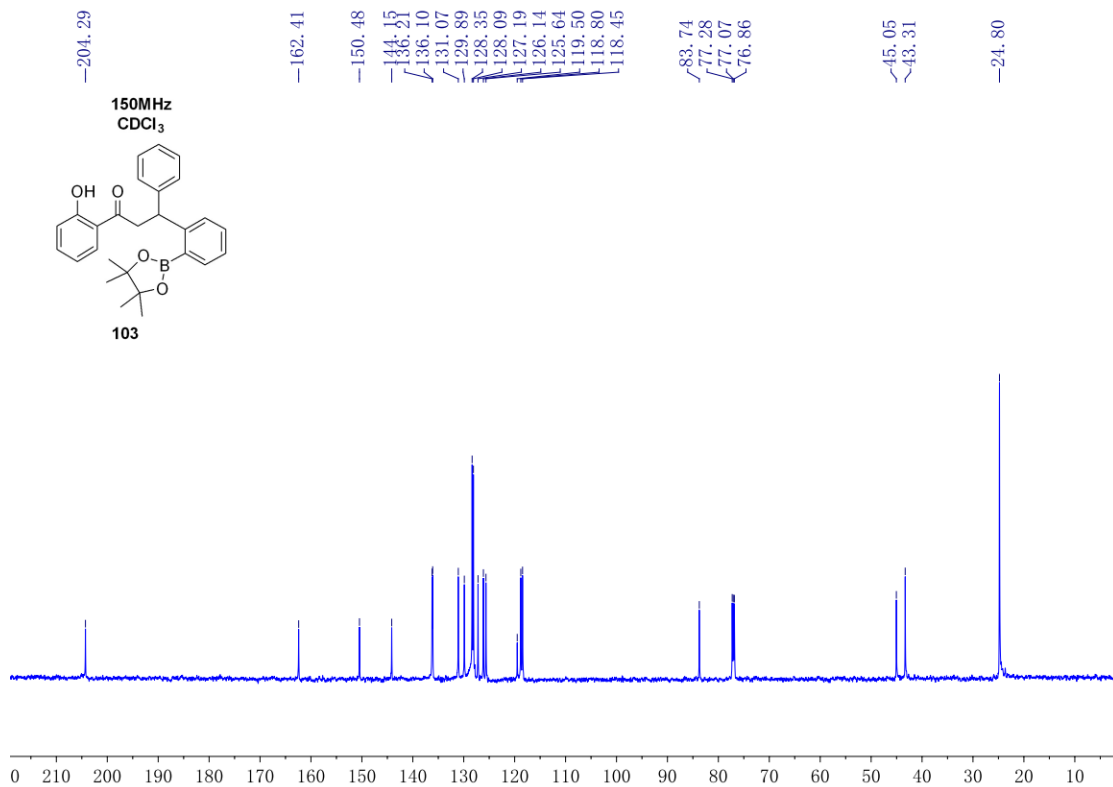



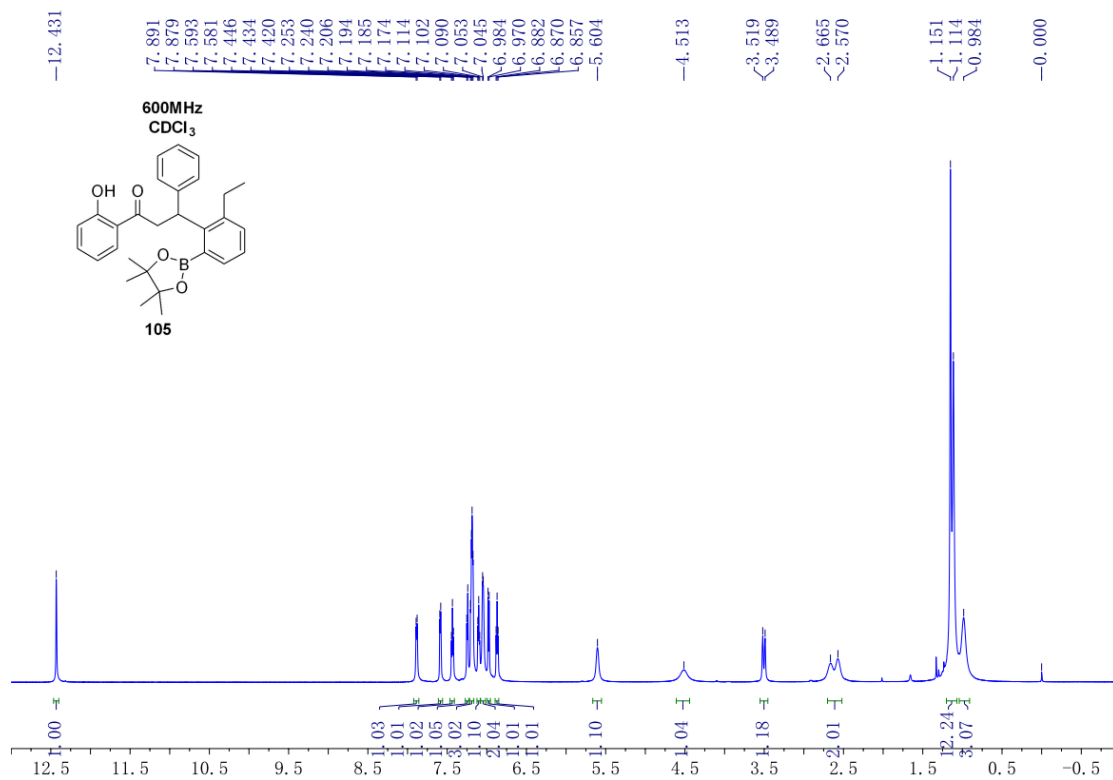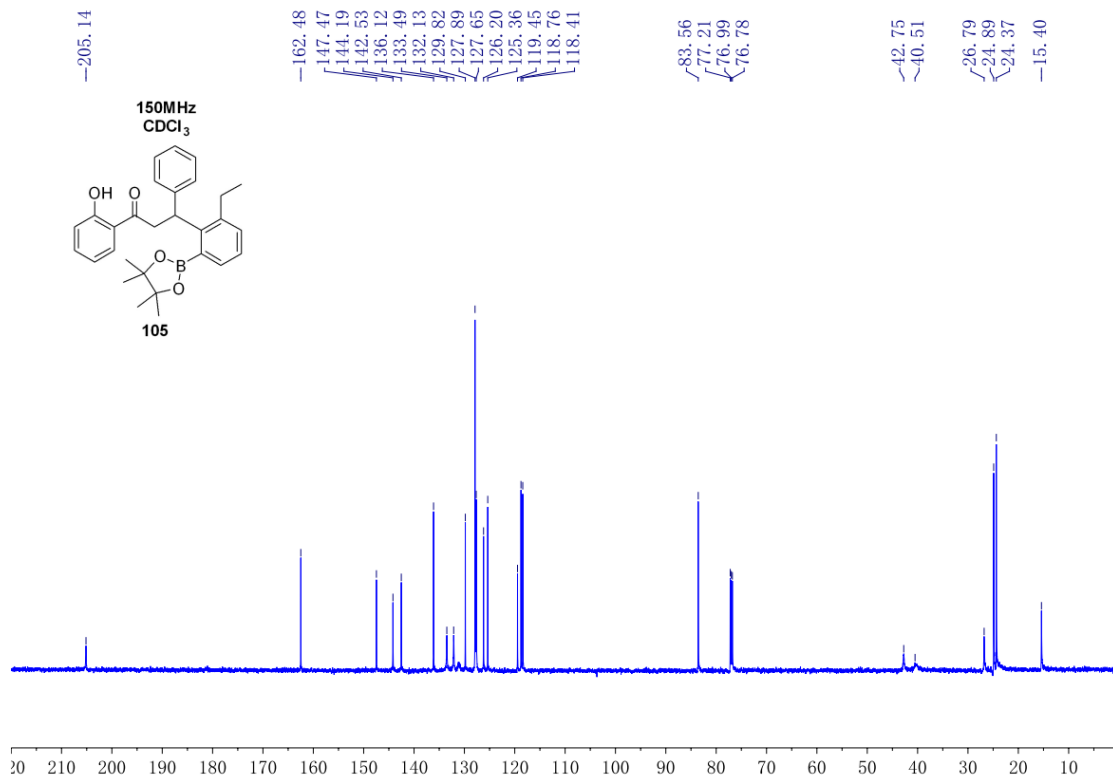



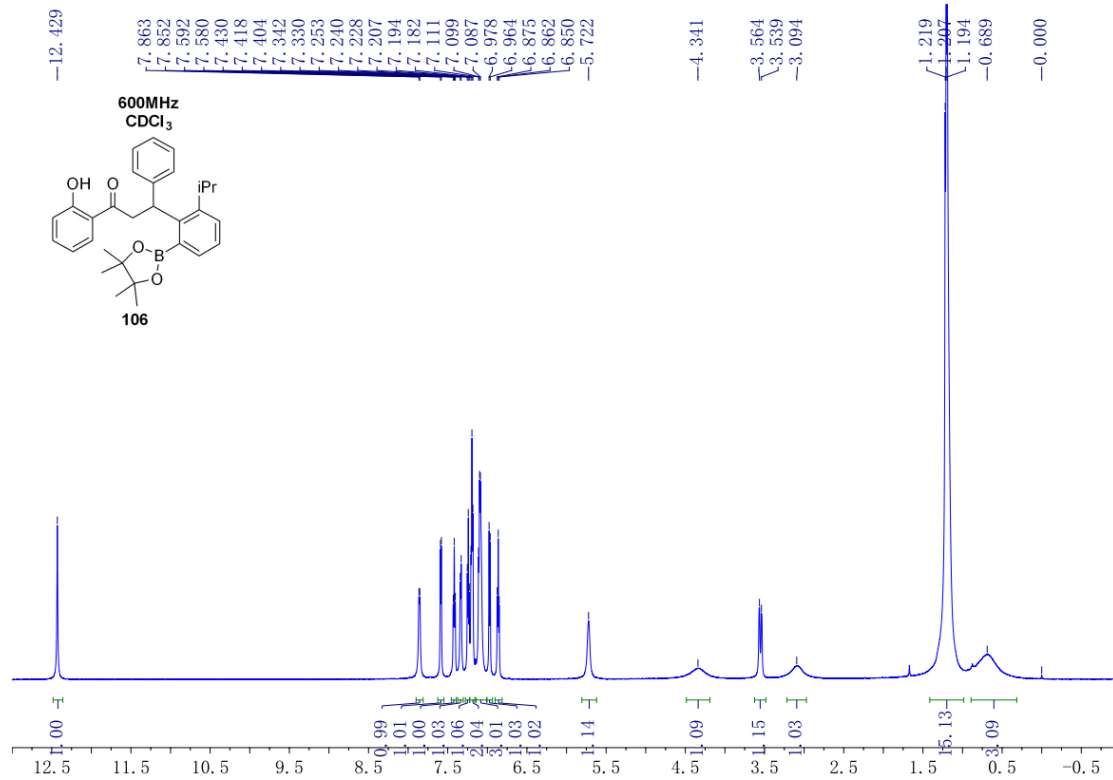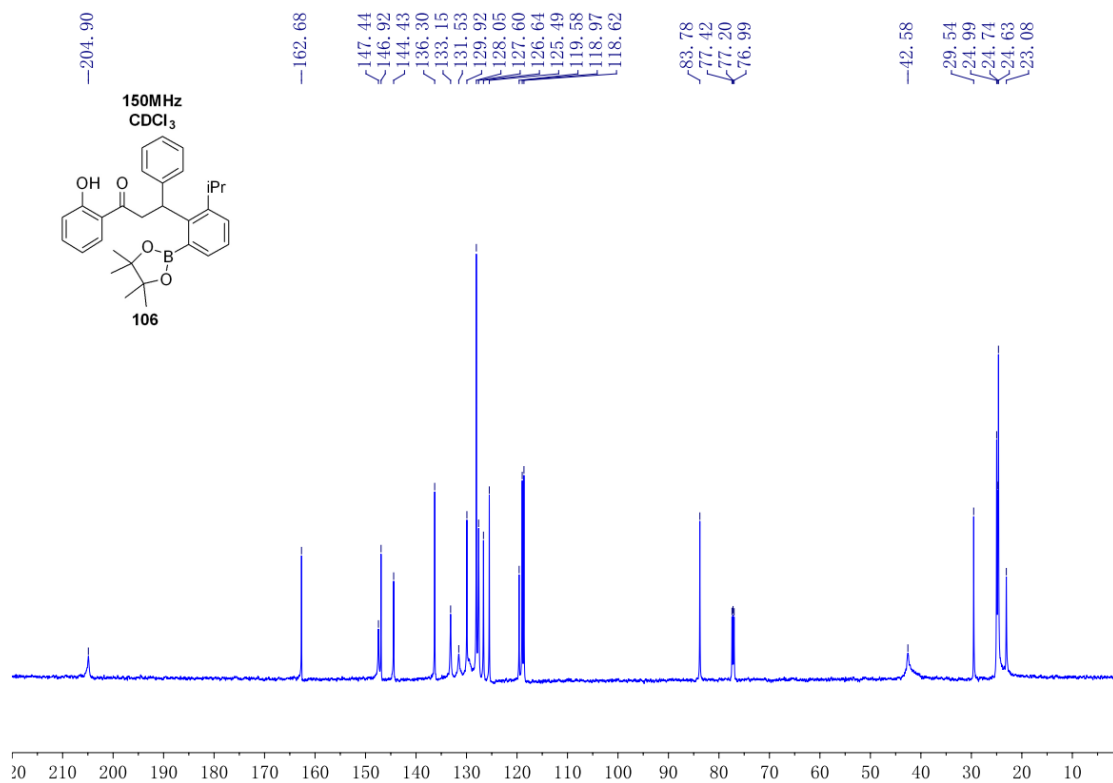

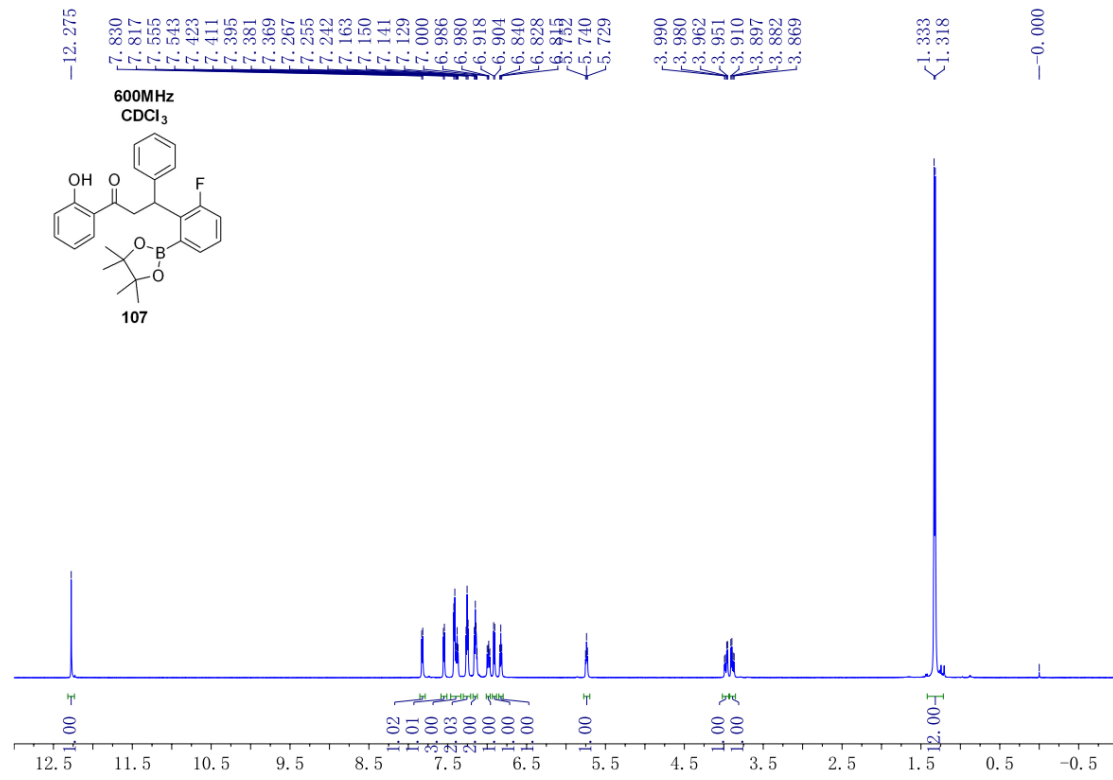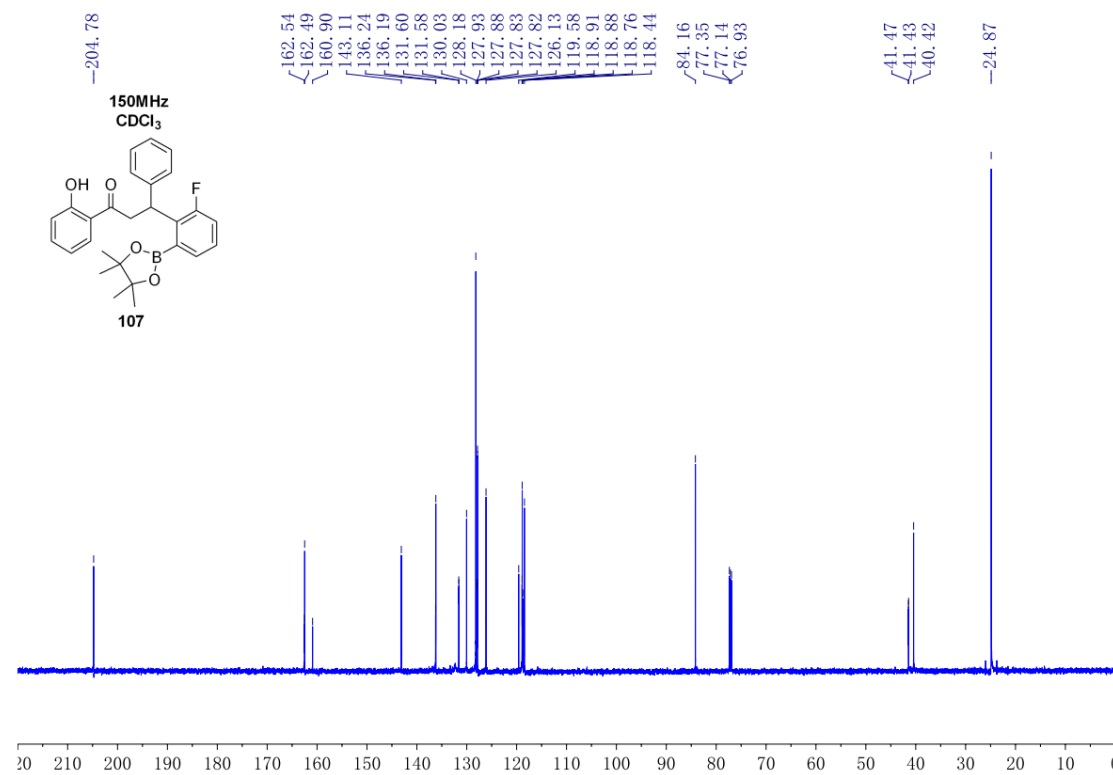

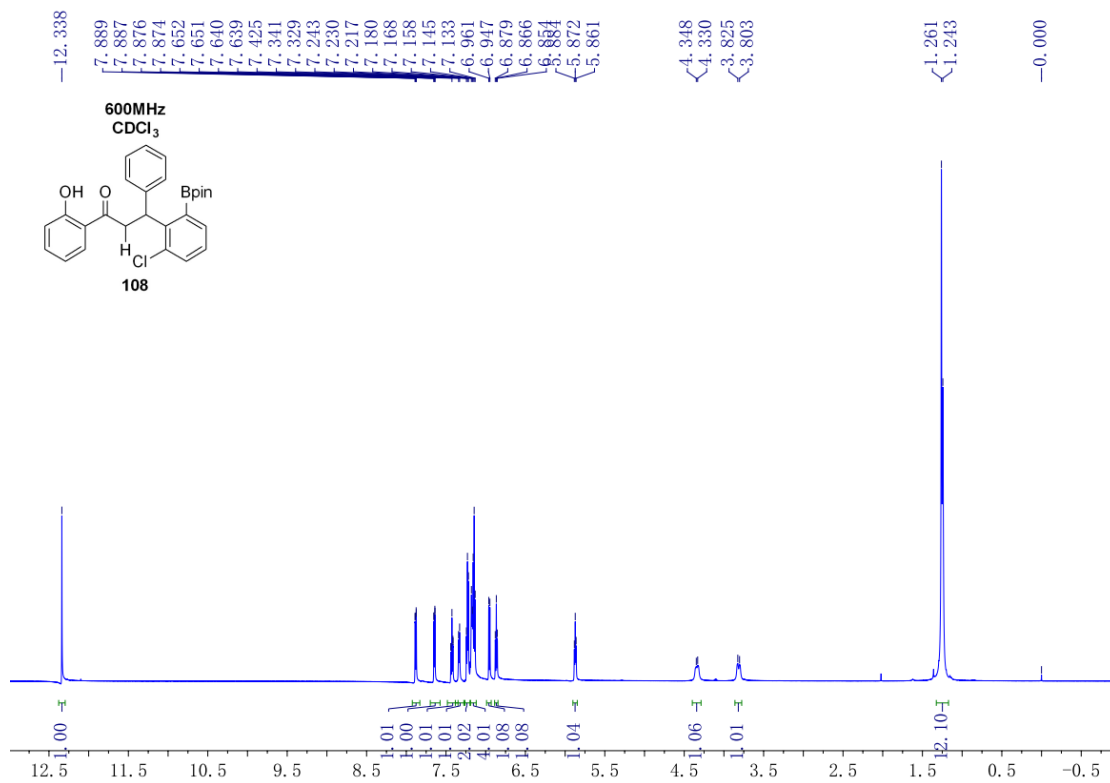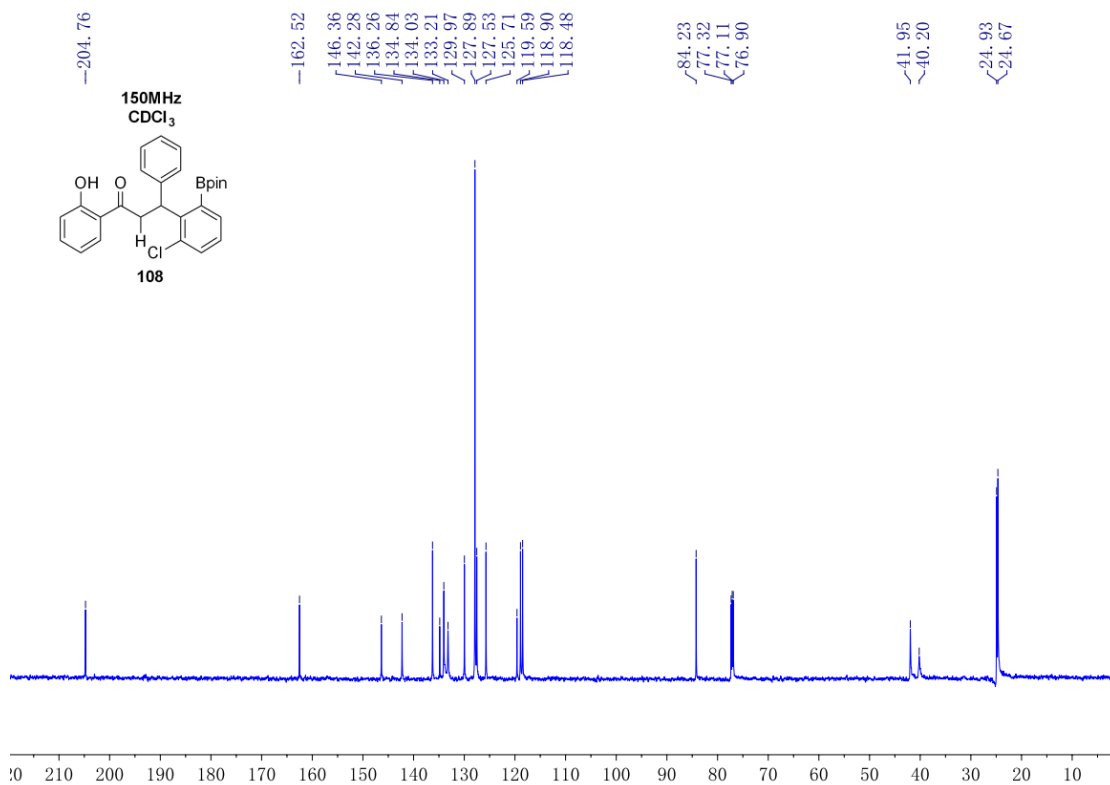

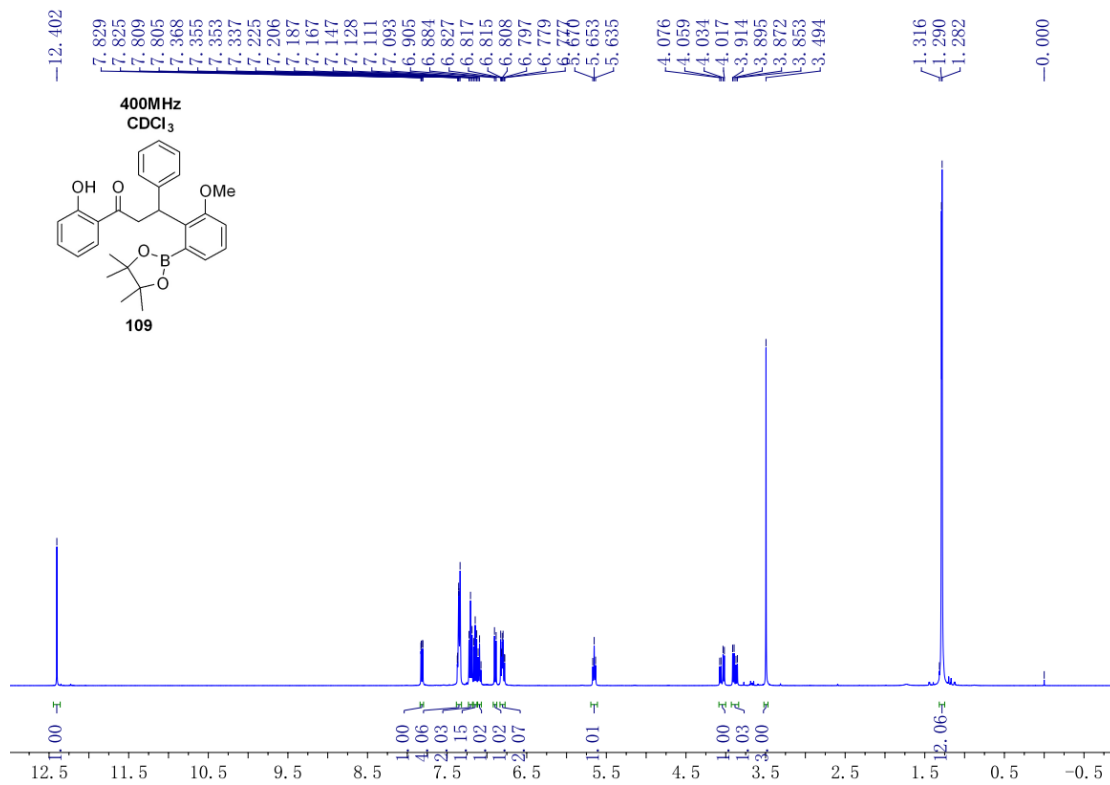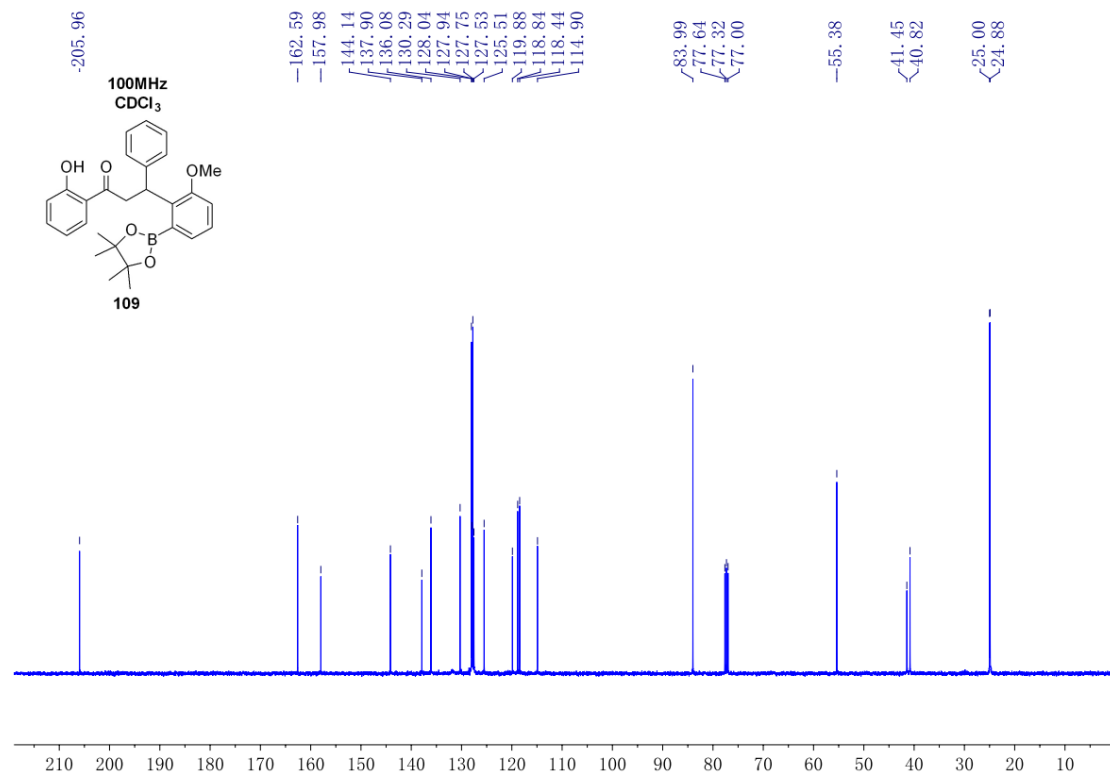

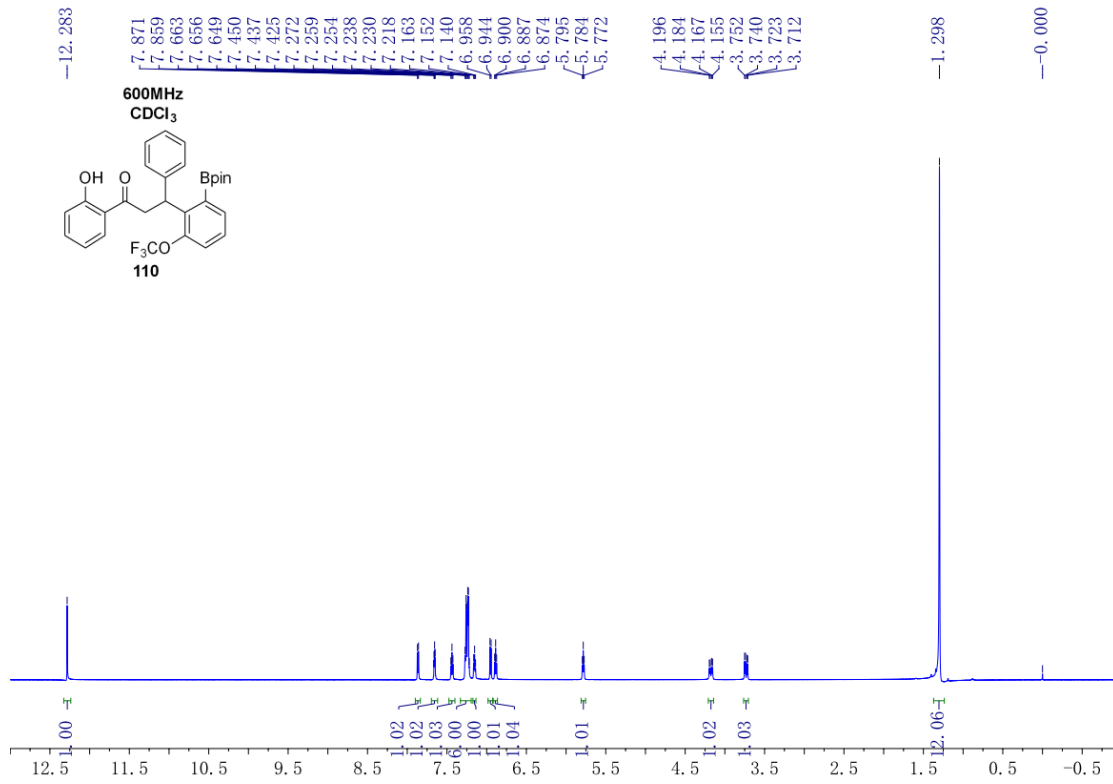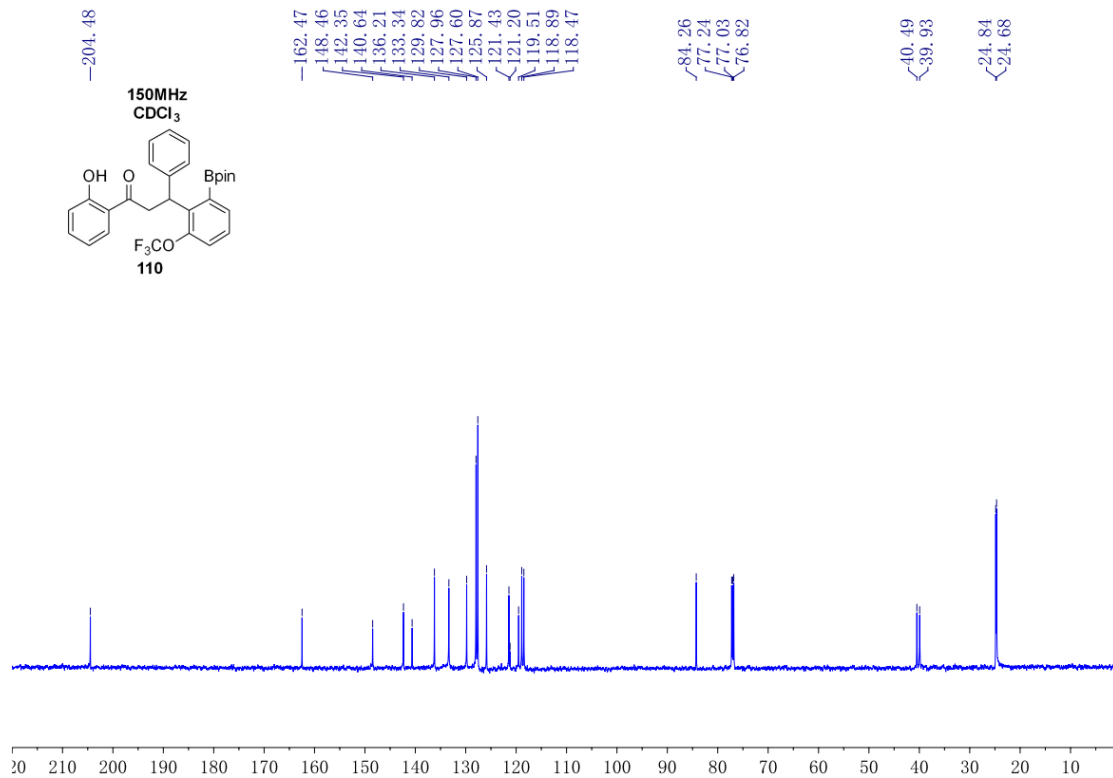

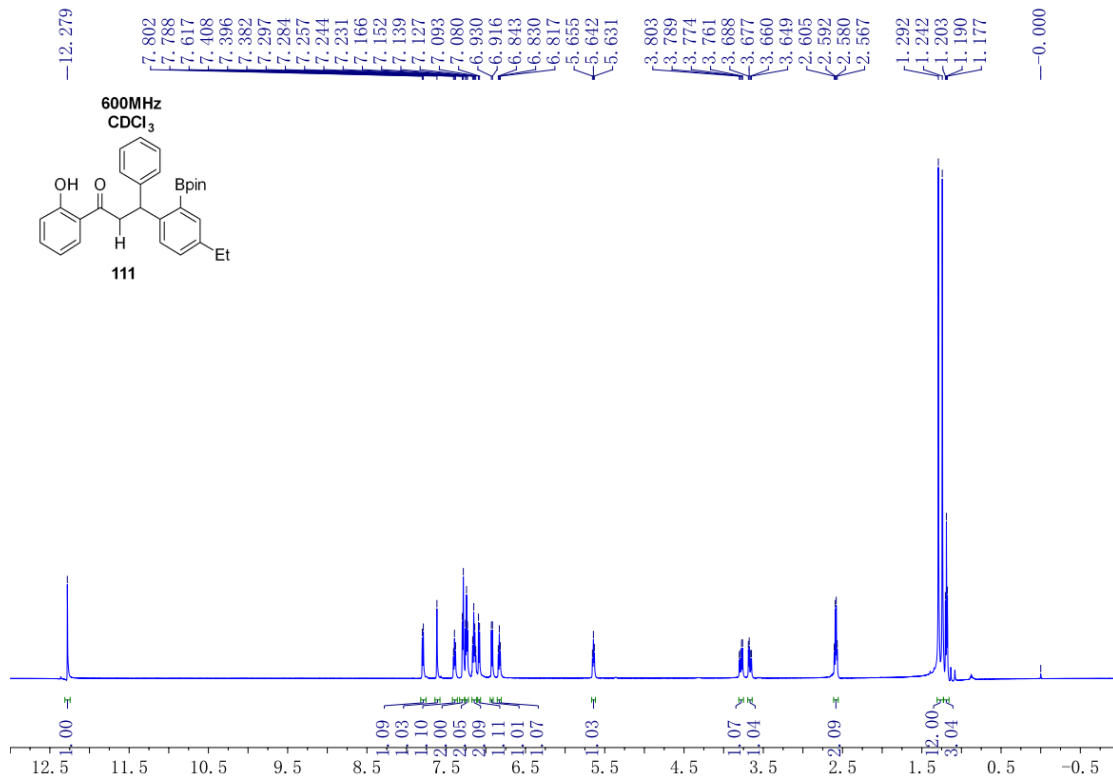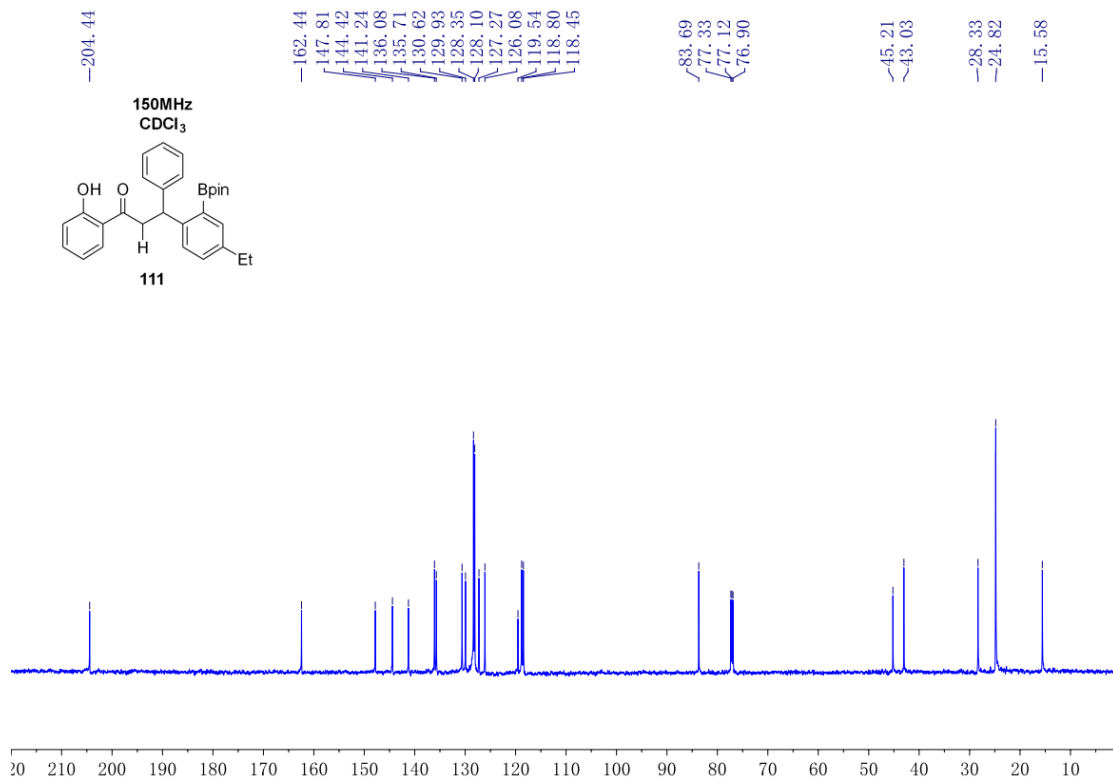

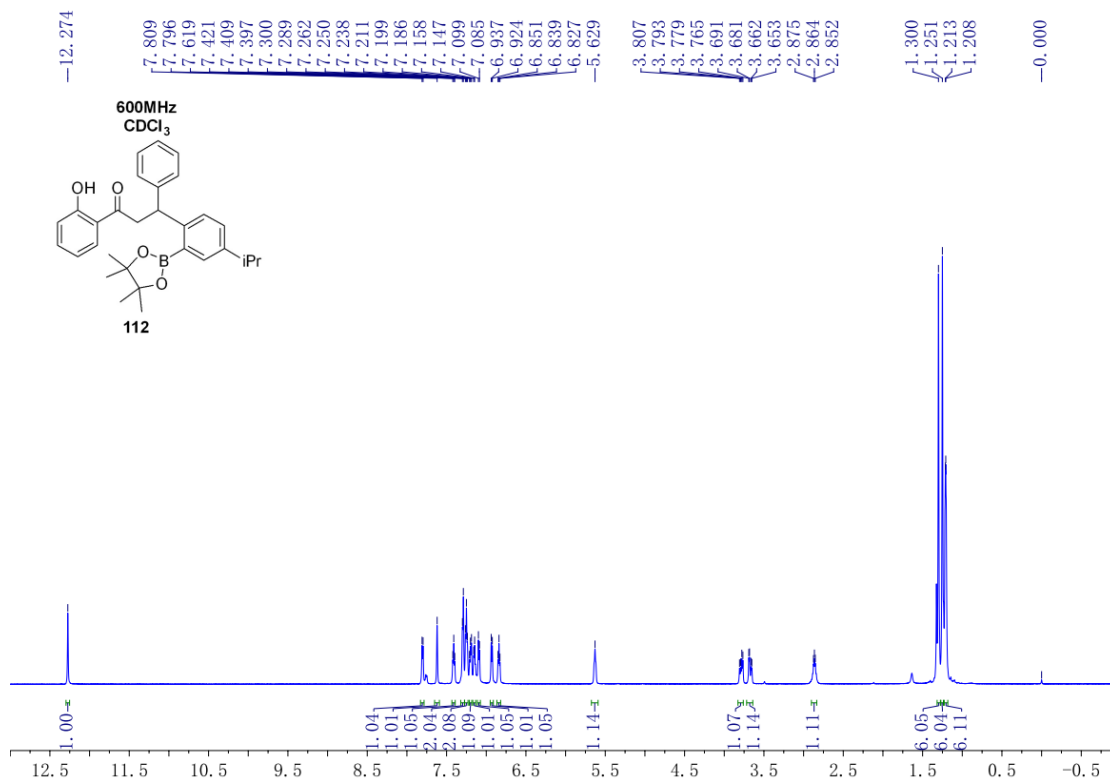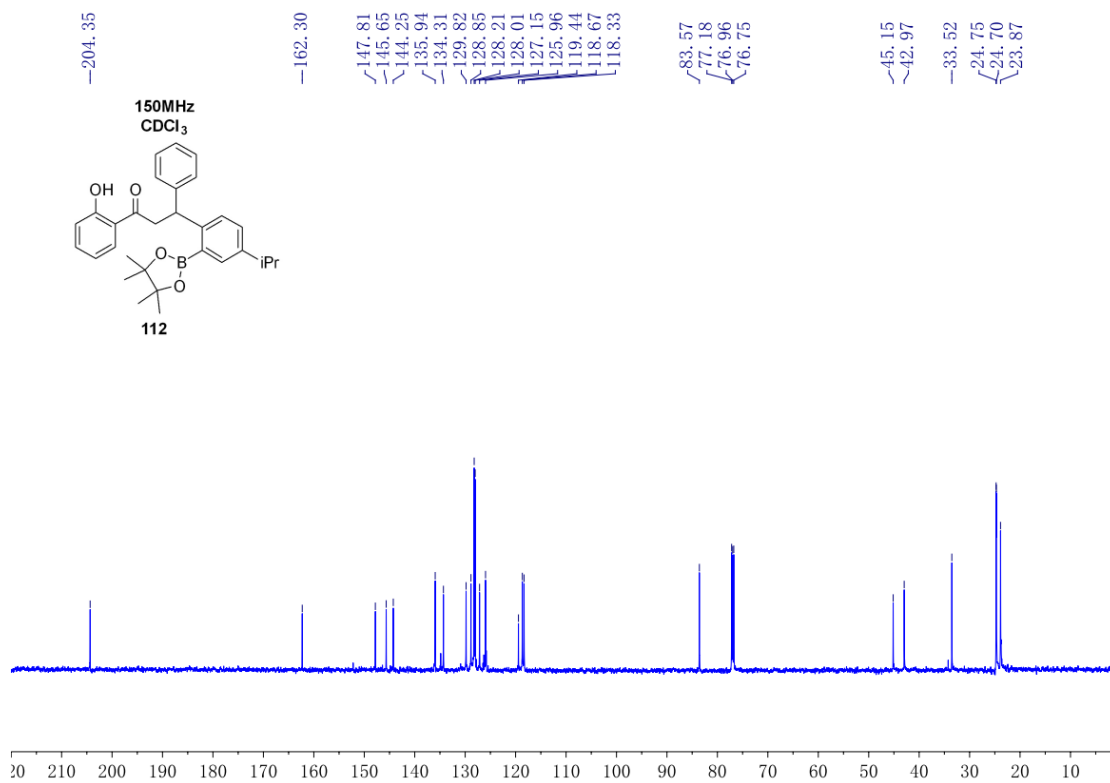

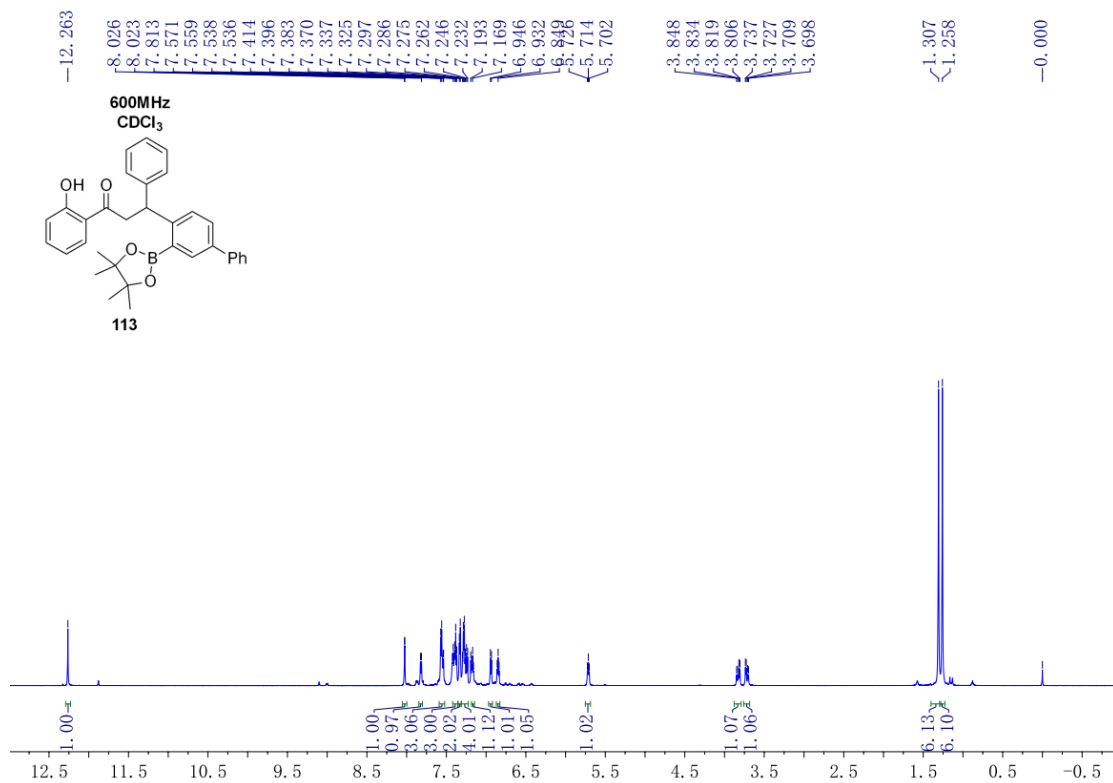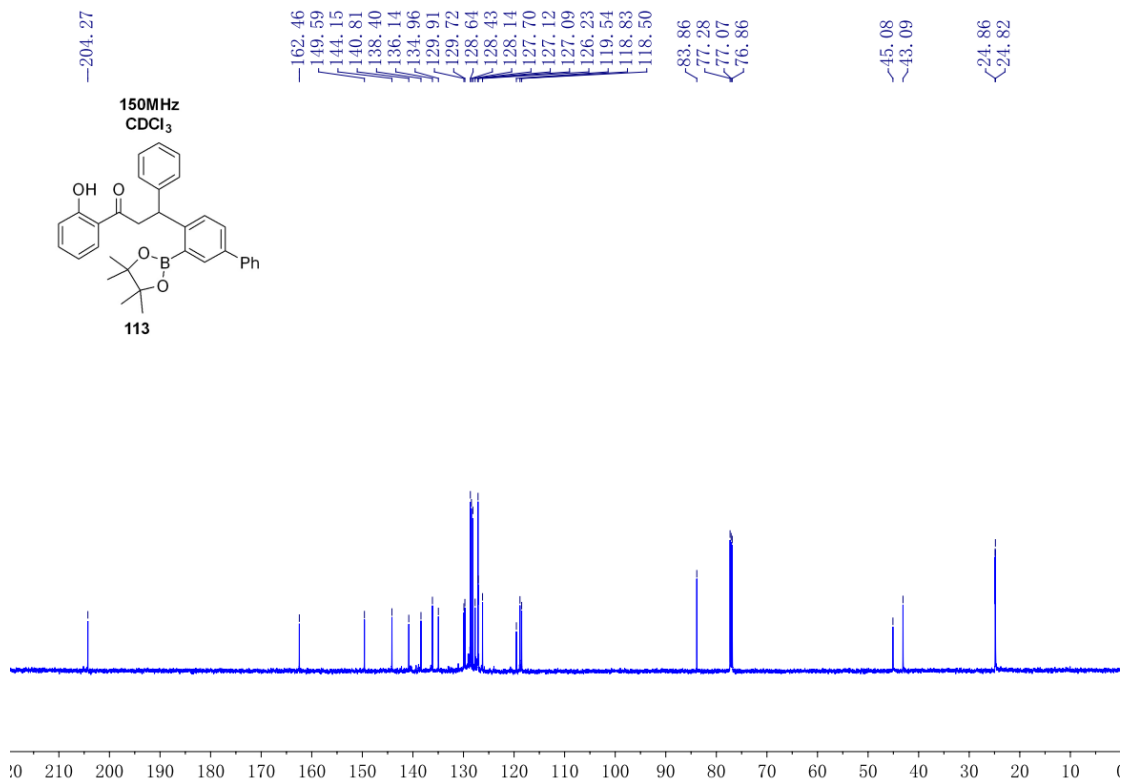





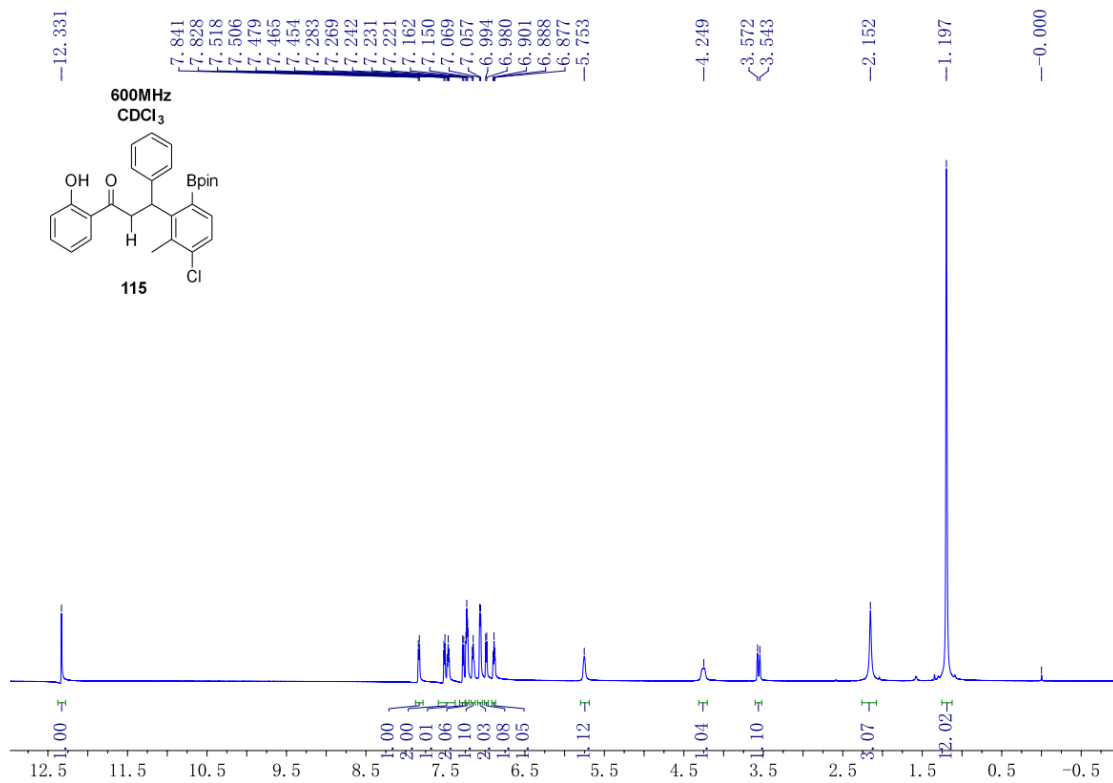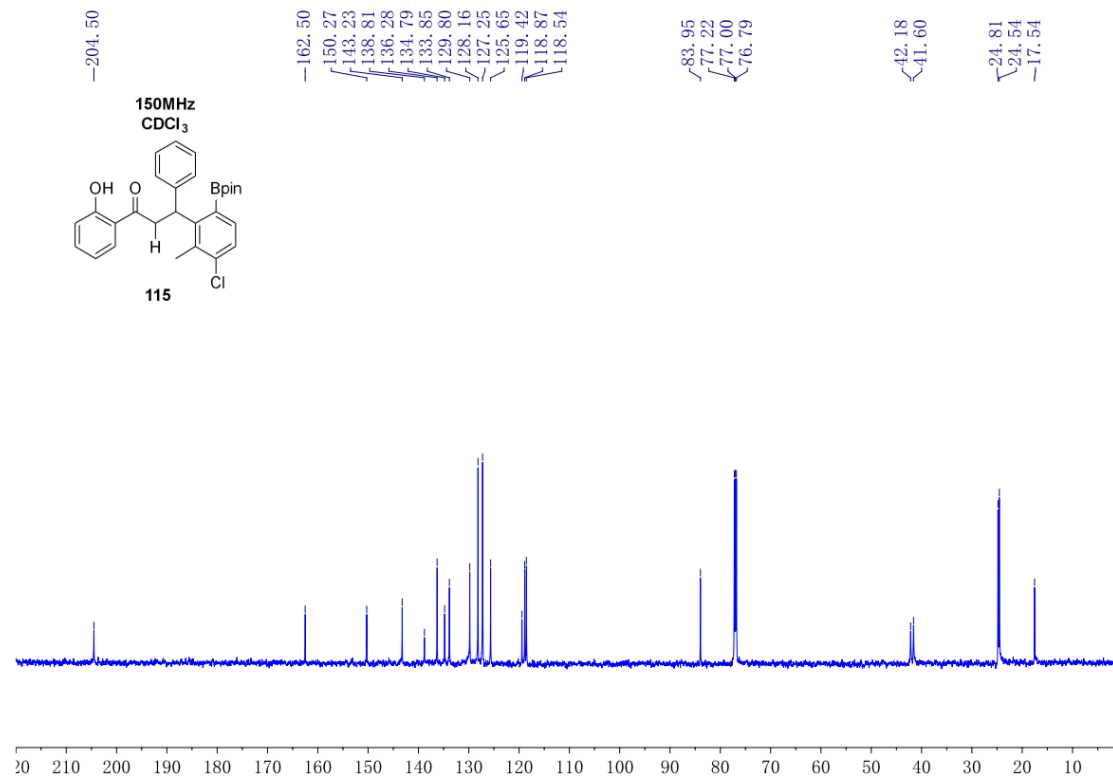

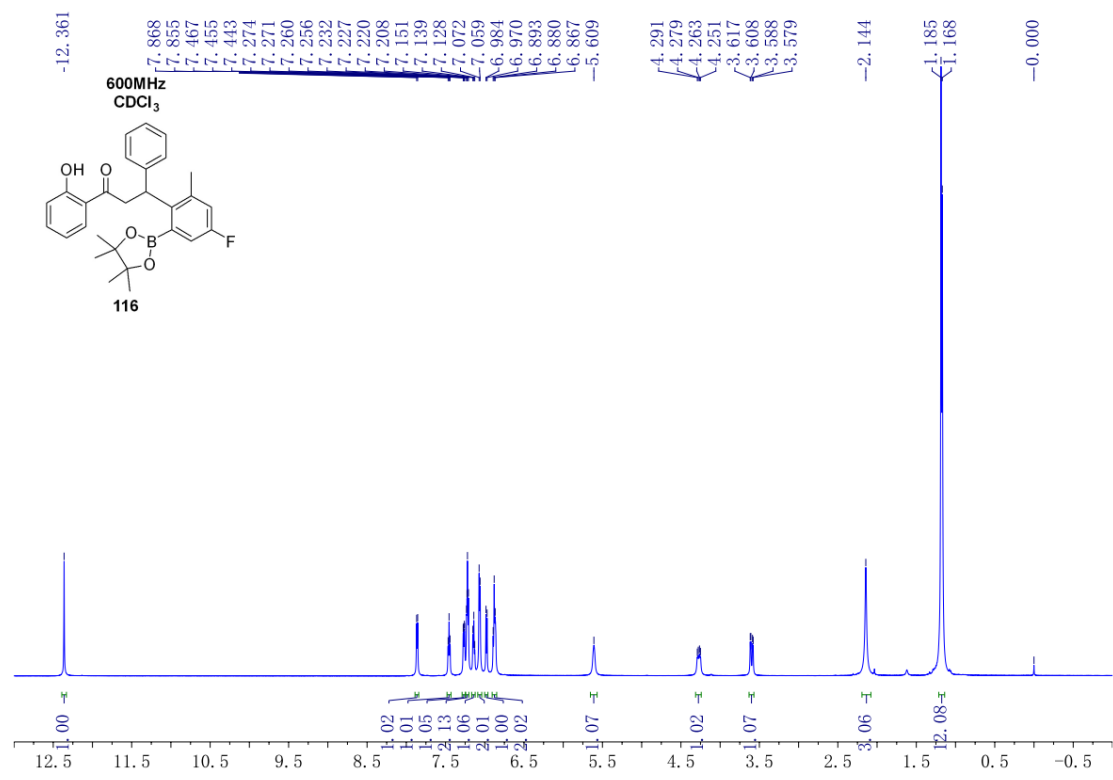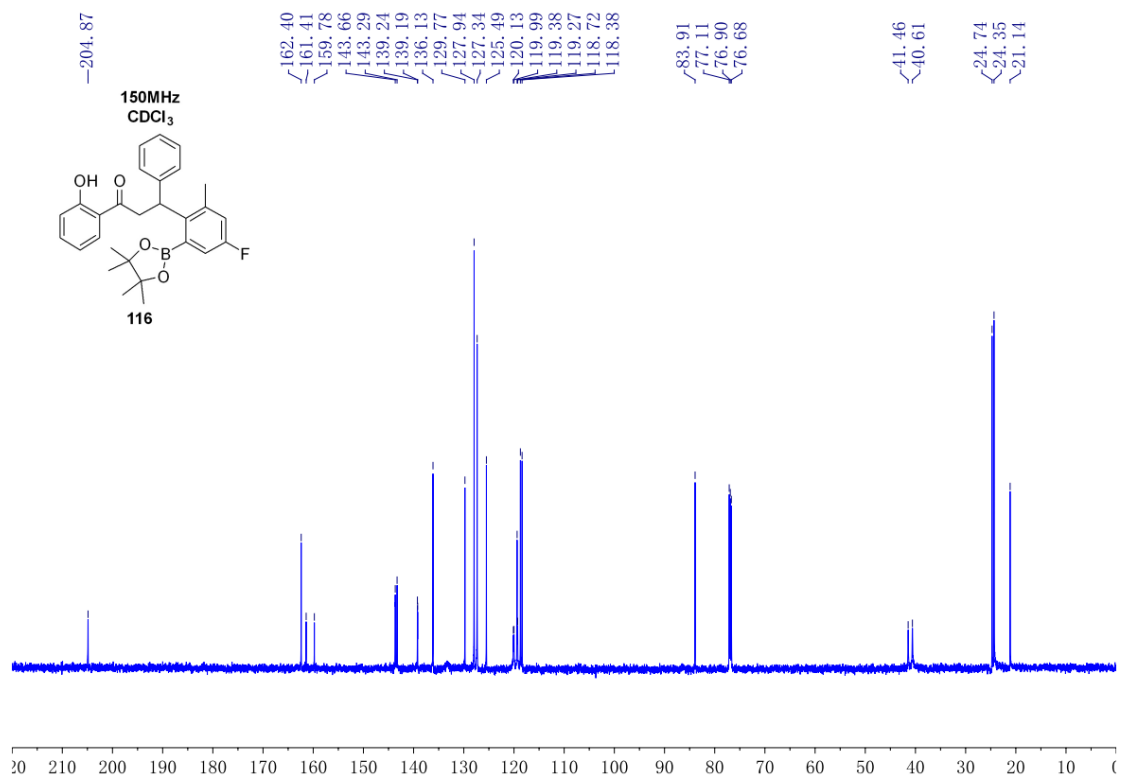

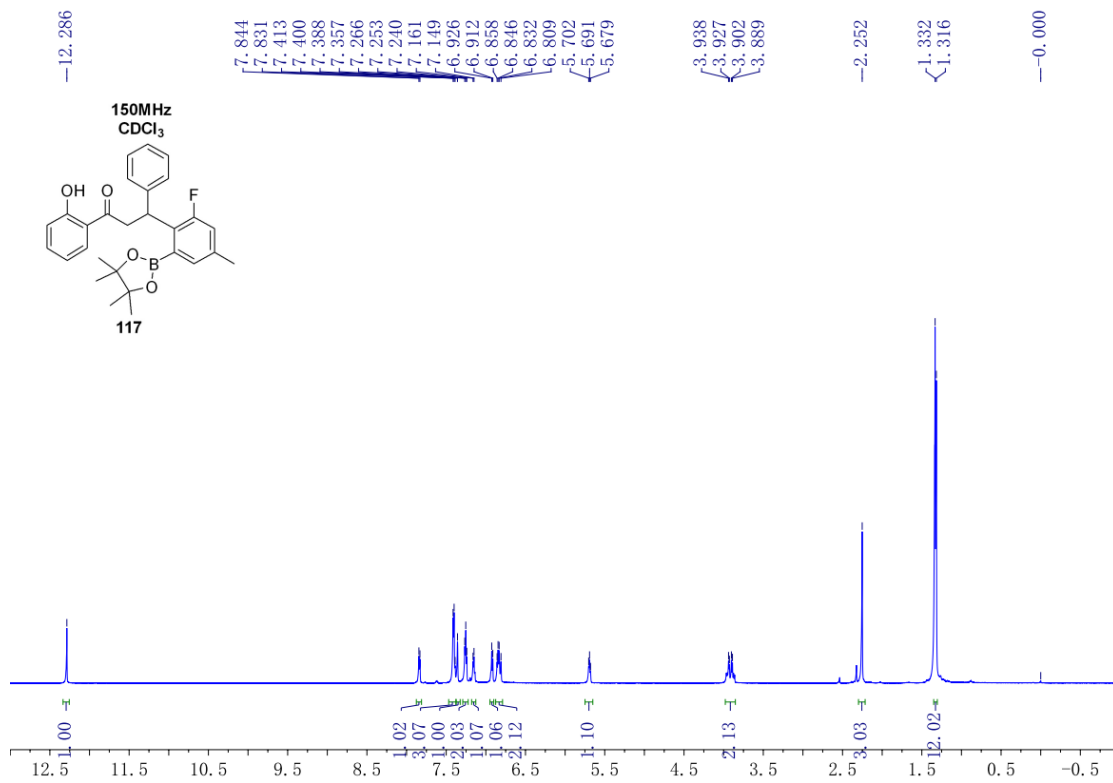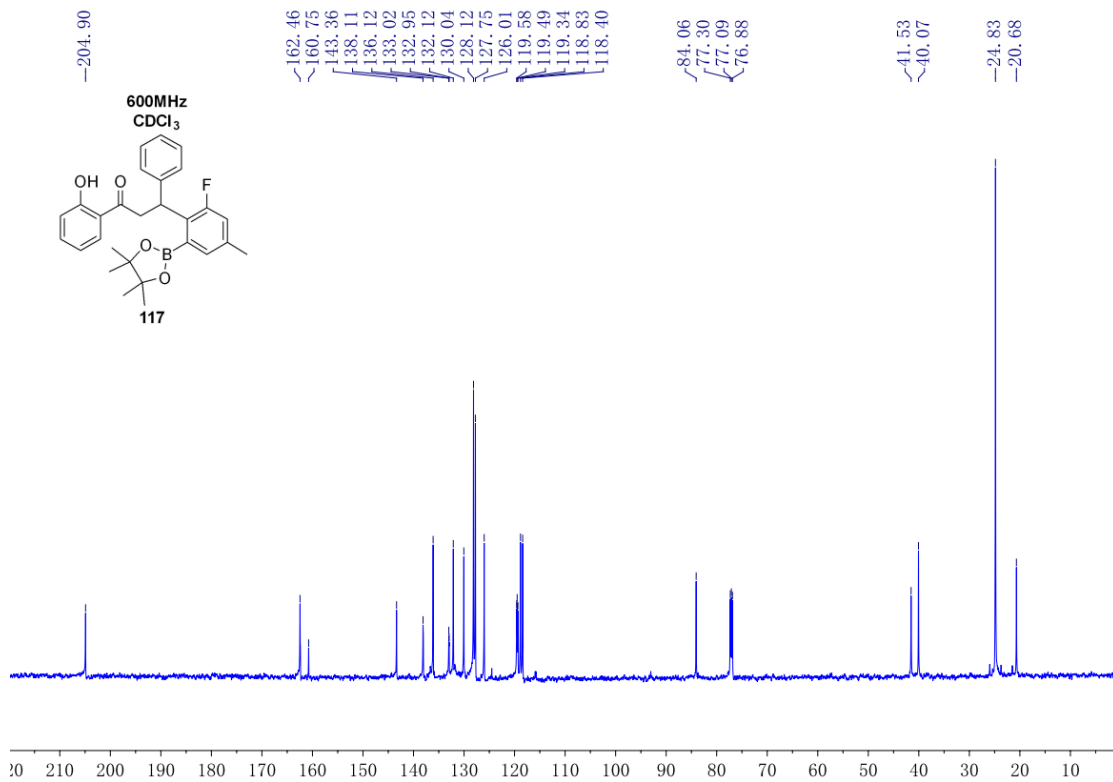

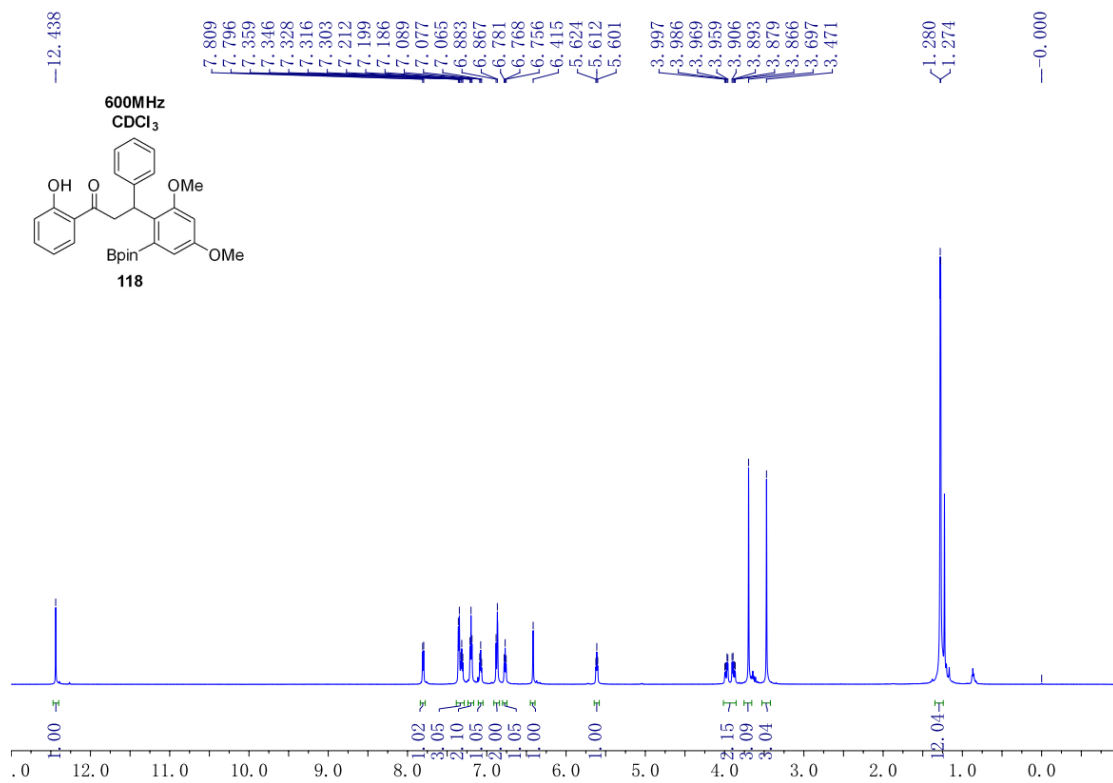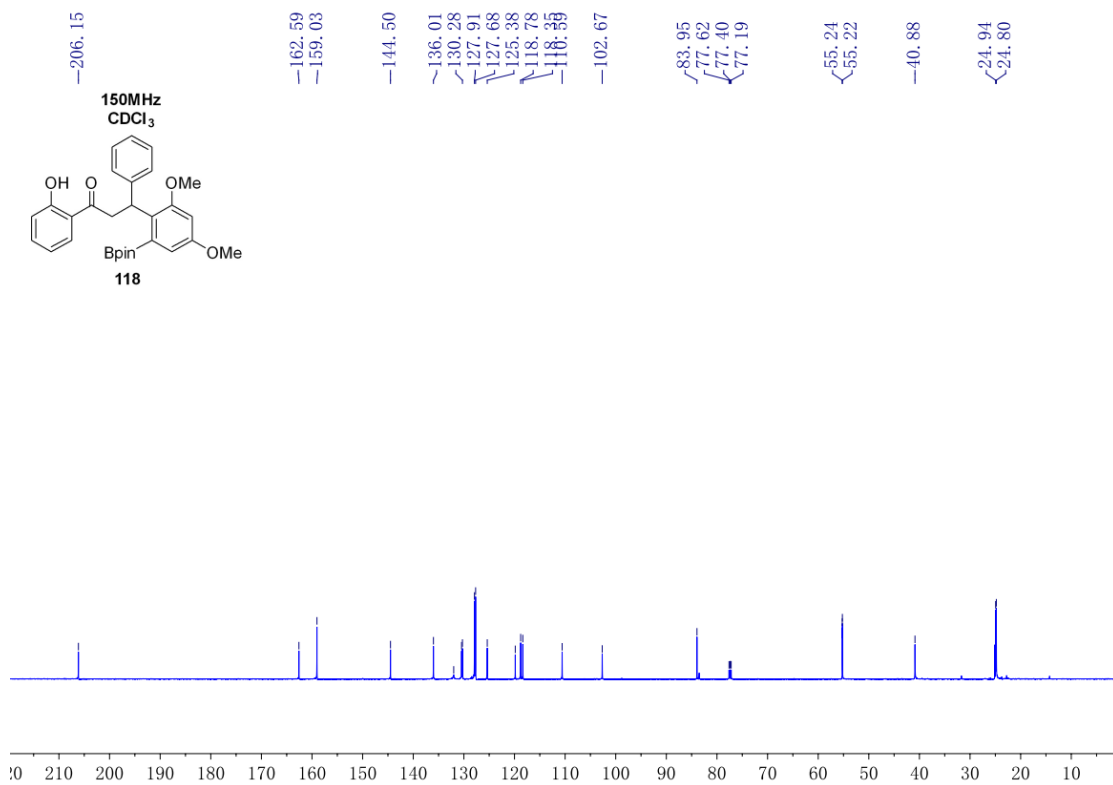

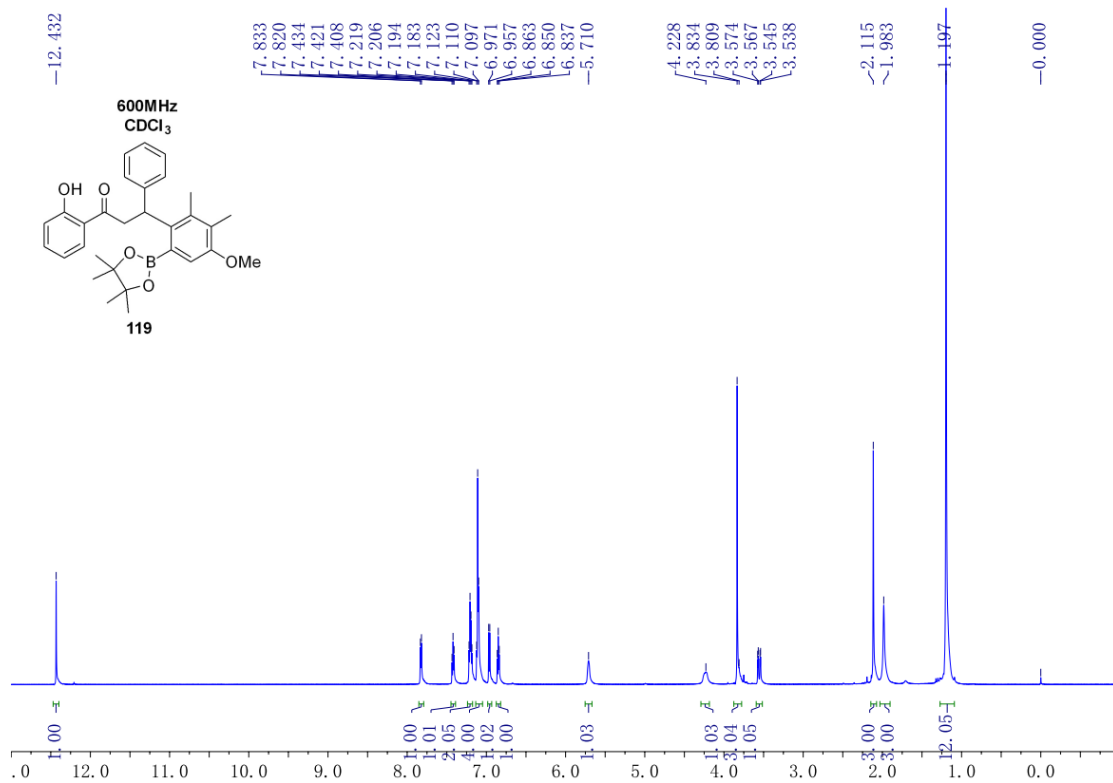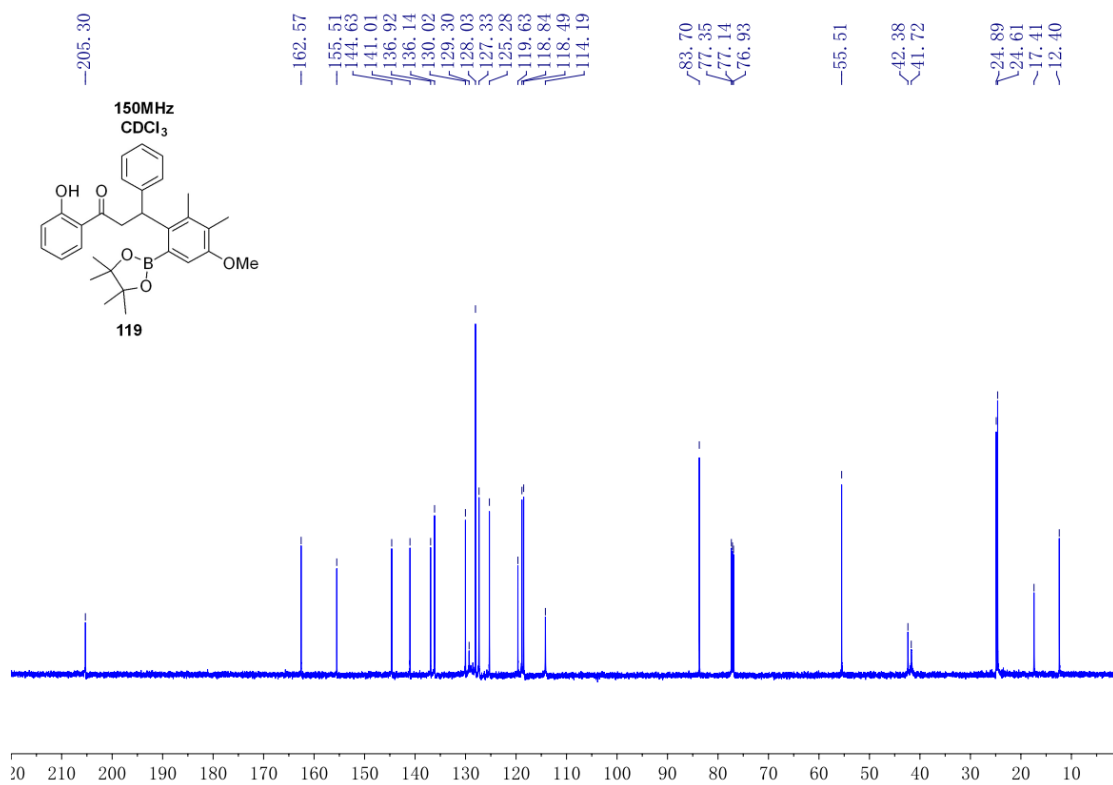

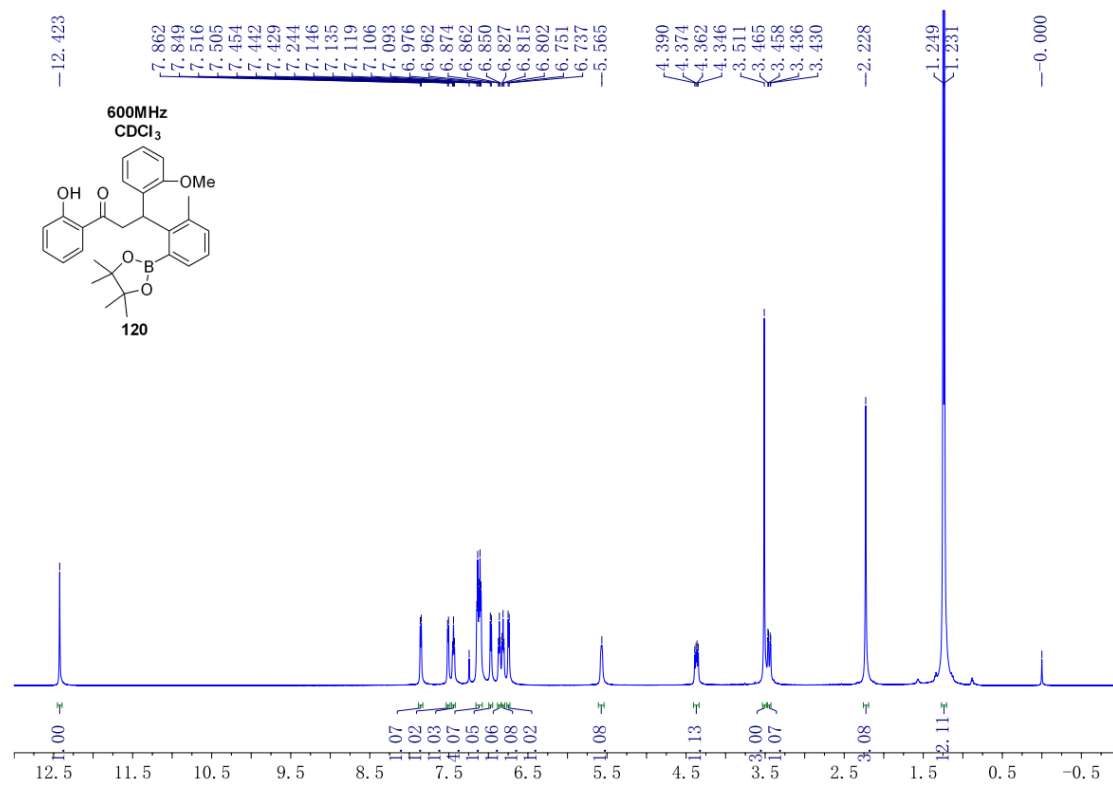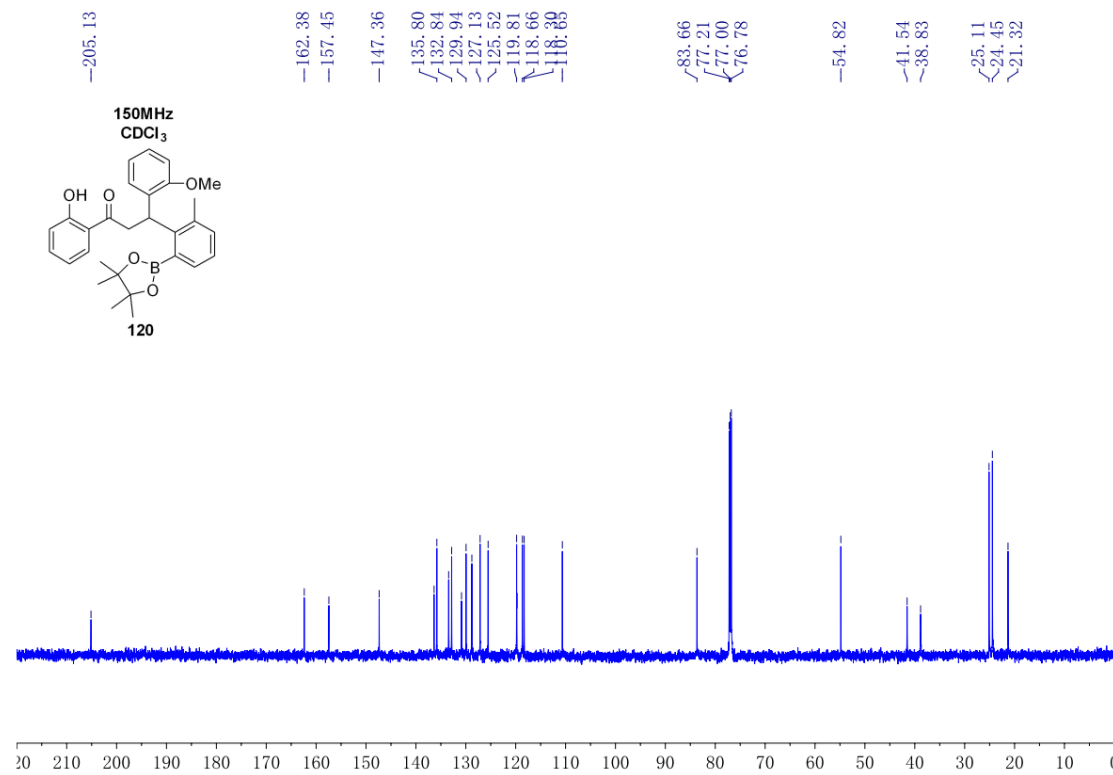

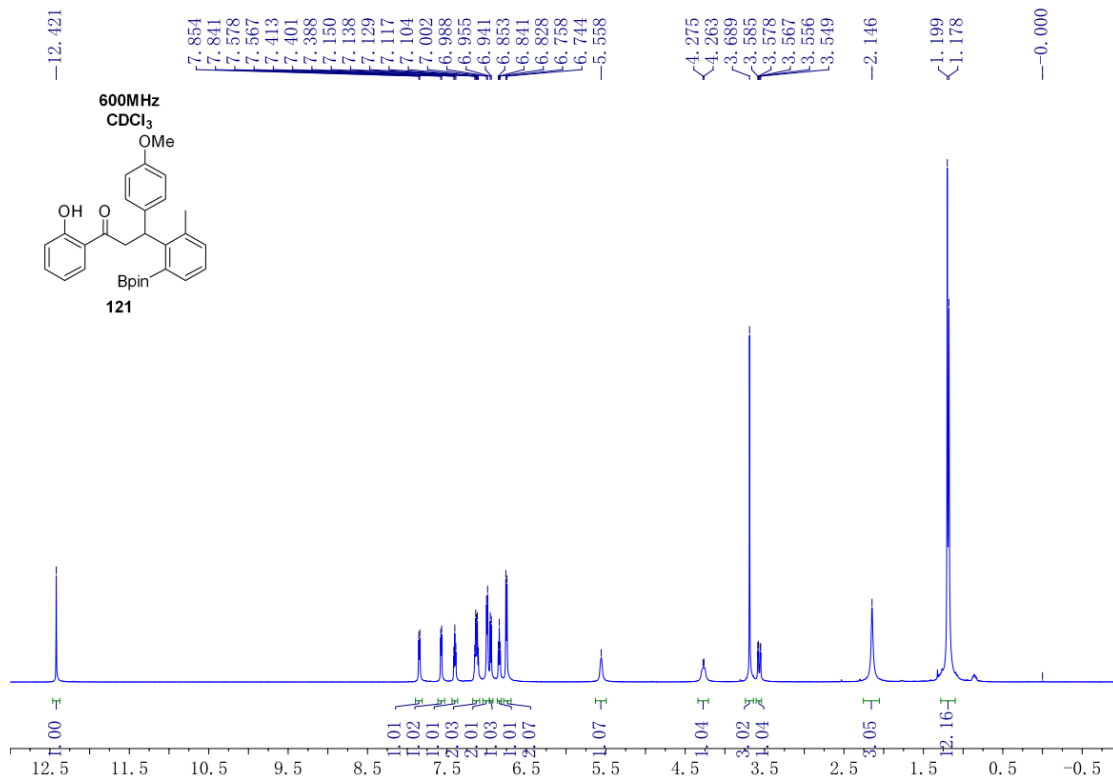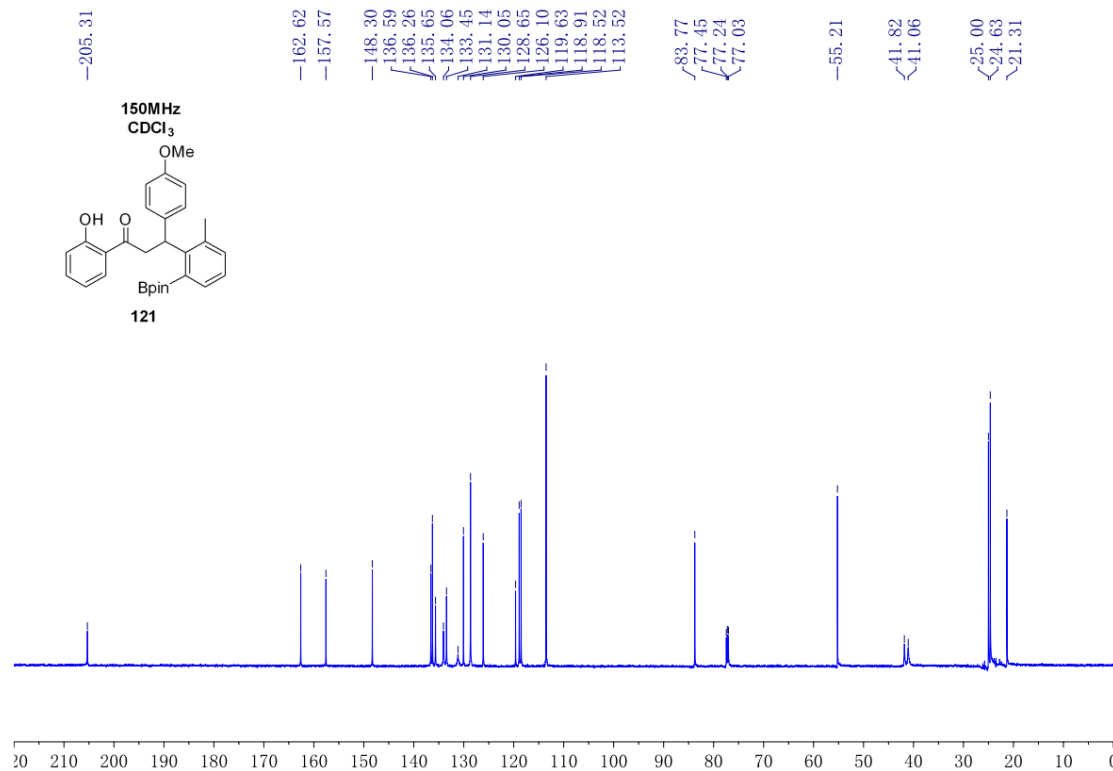



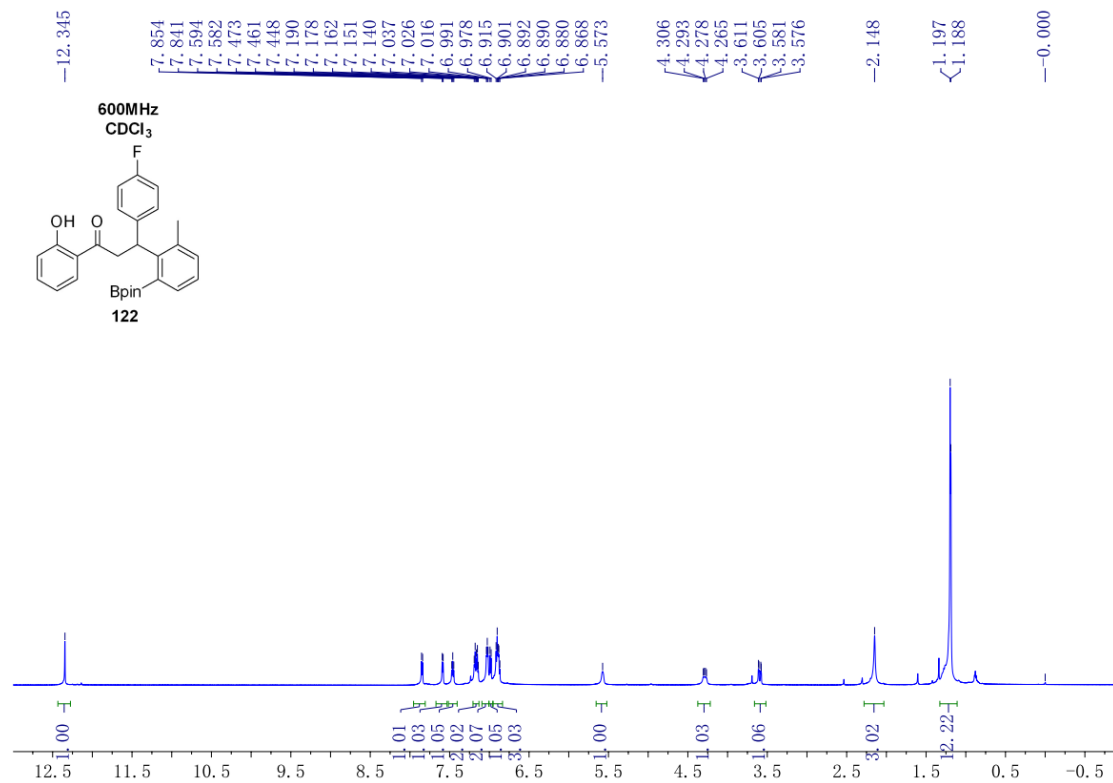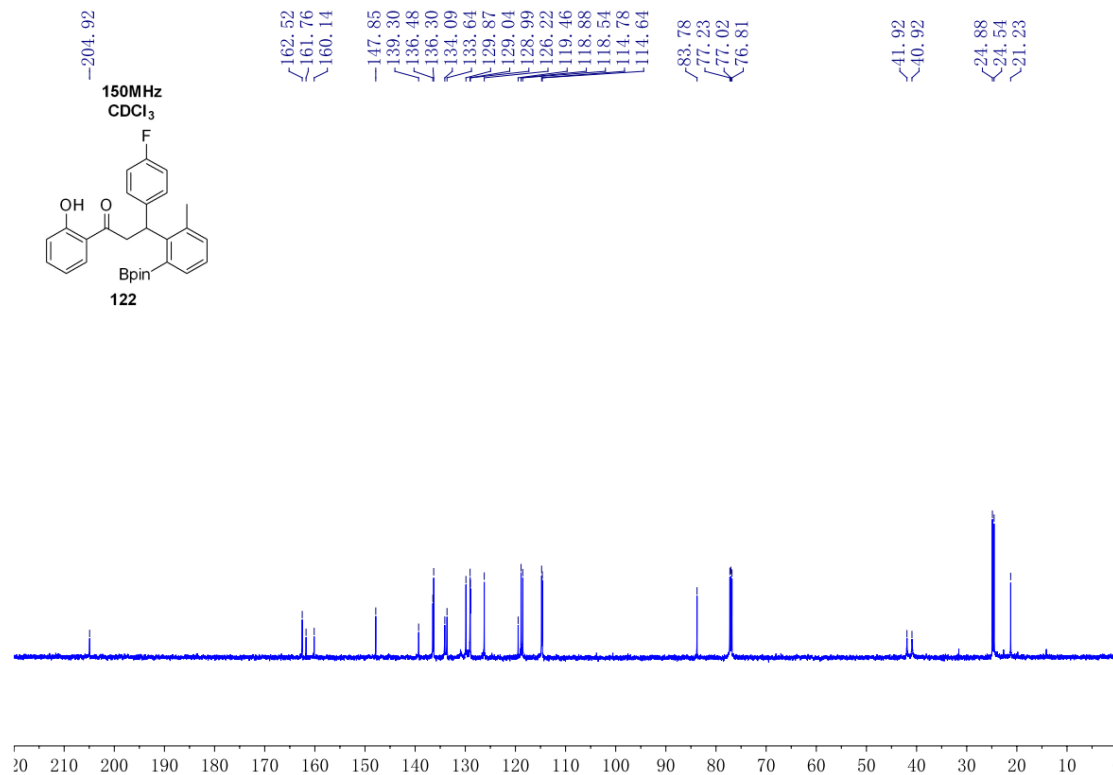

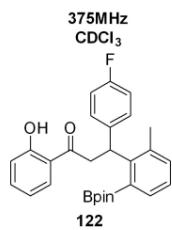

-118.114

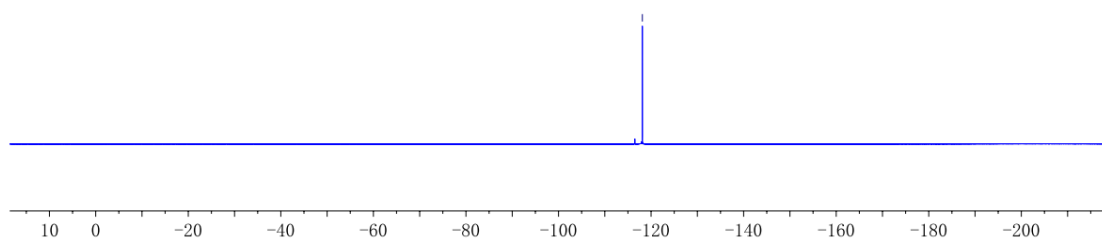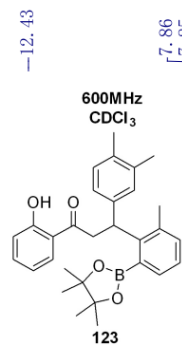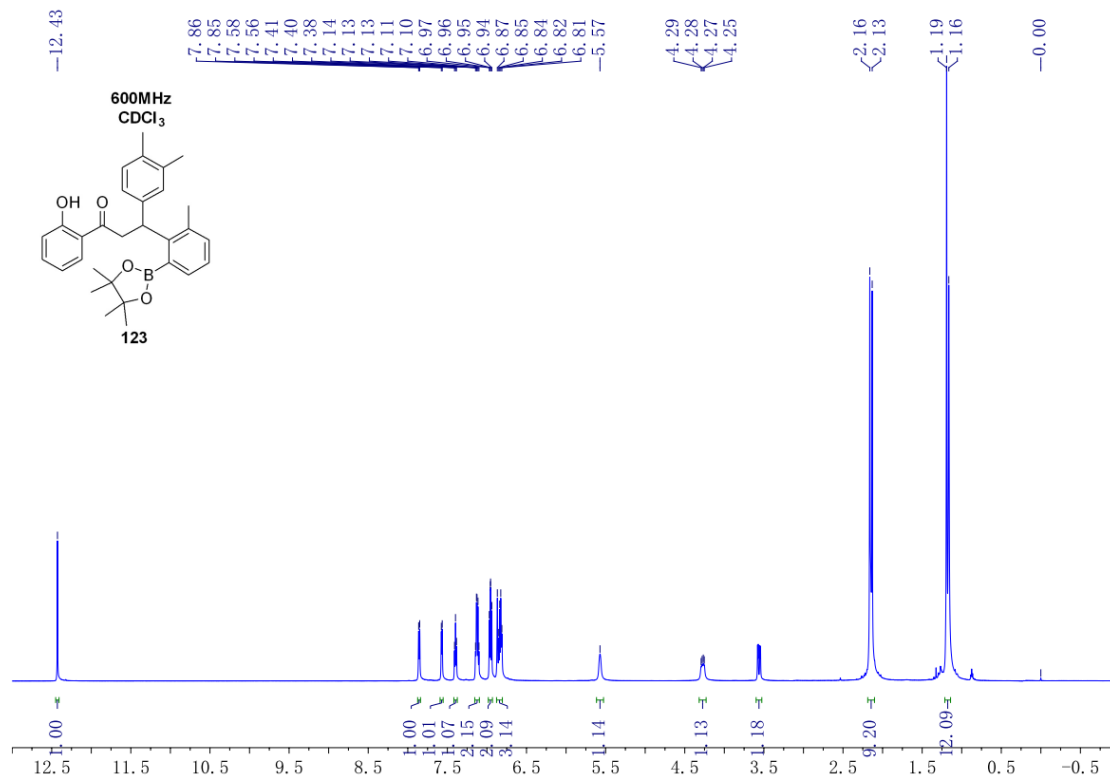

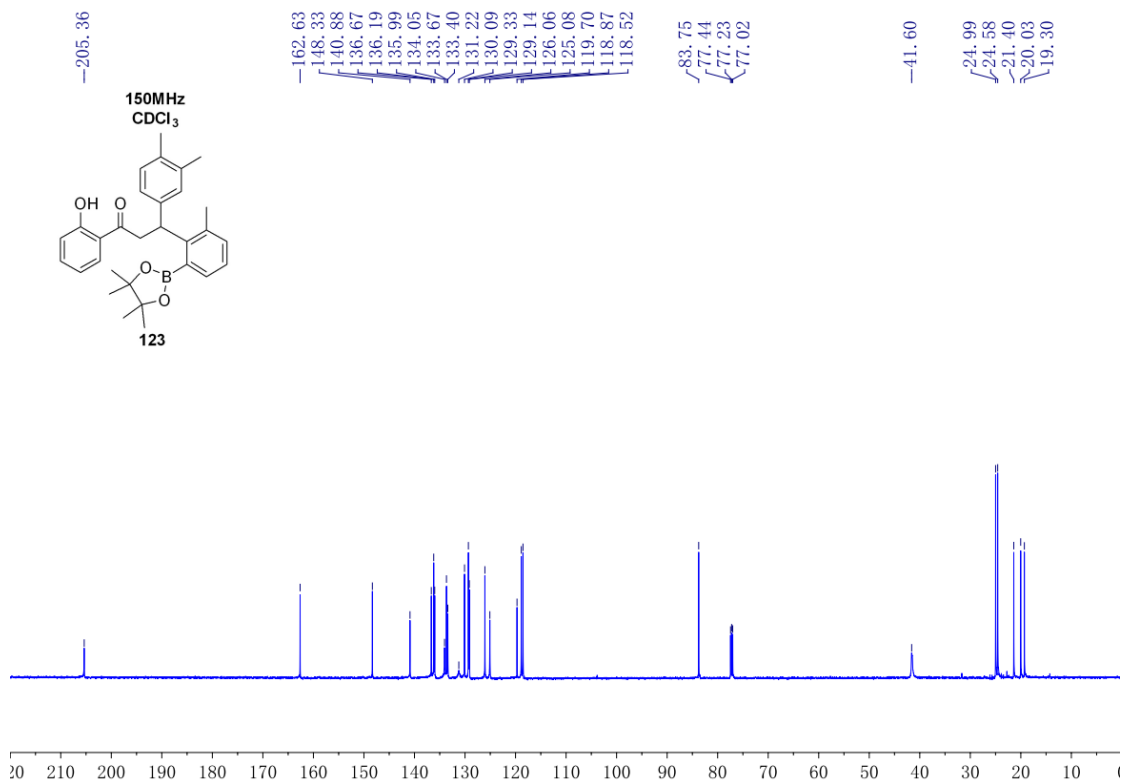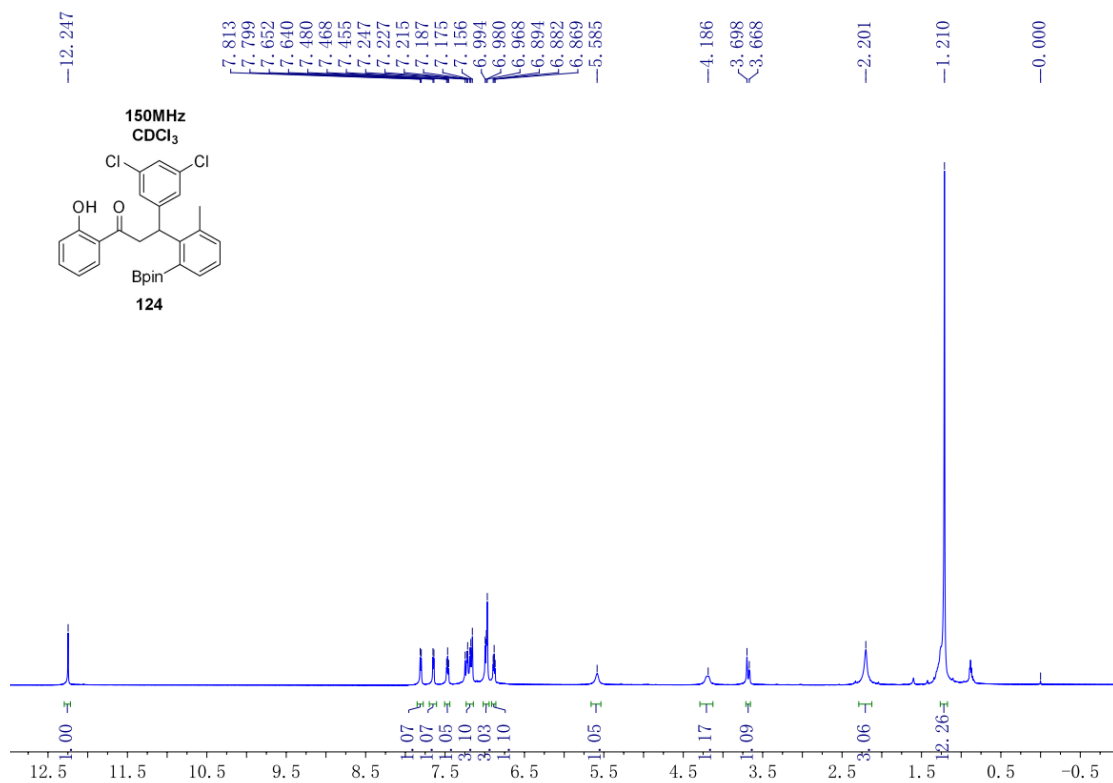

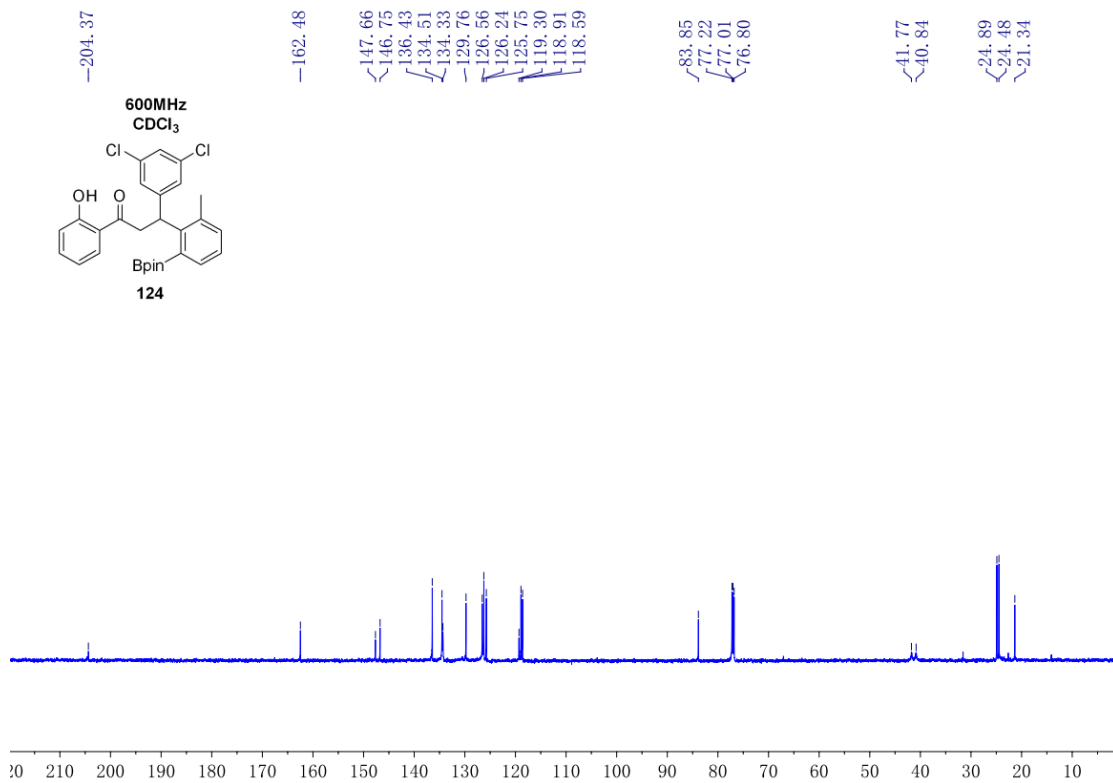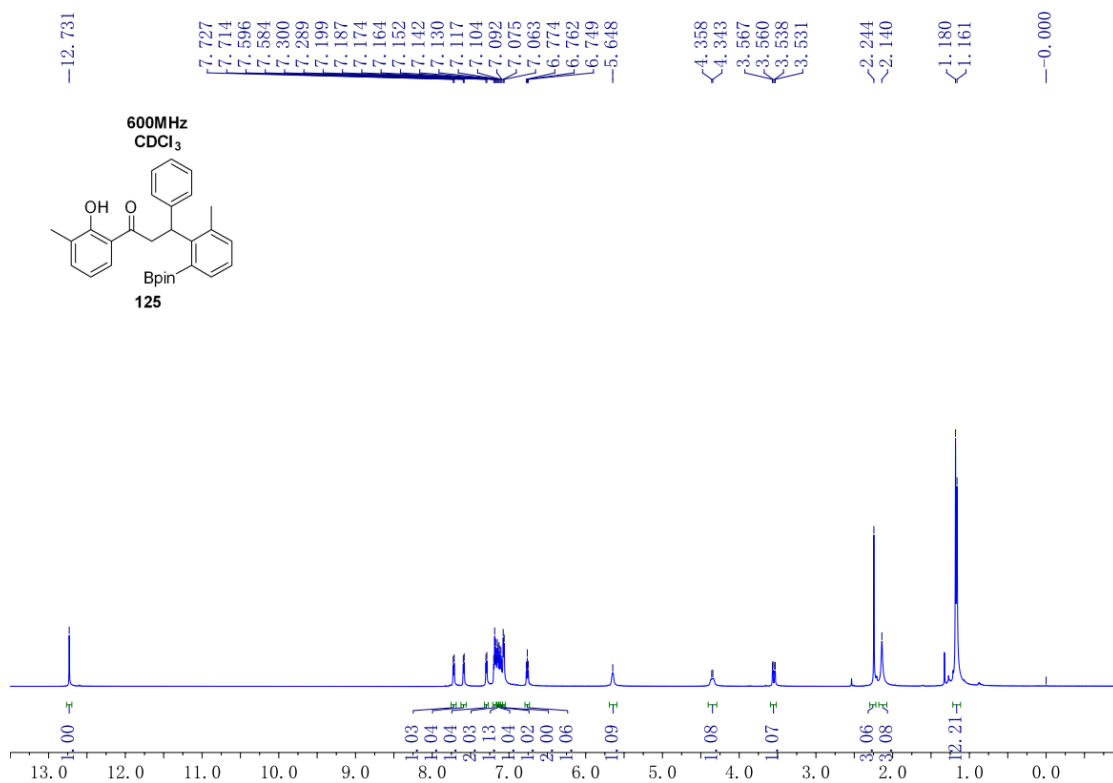

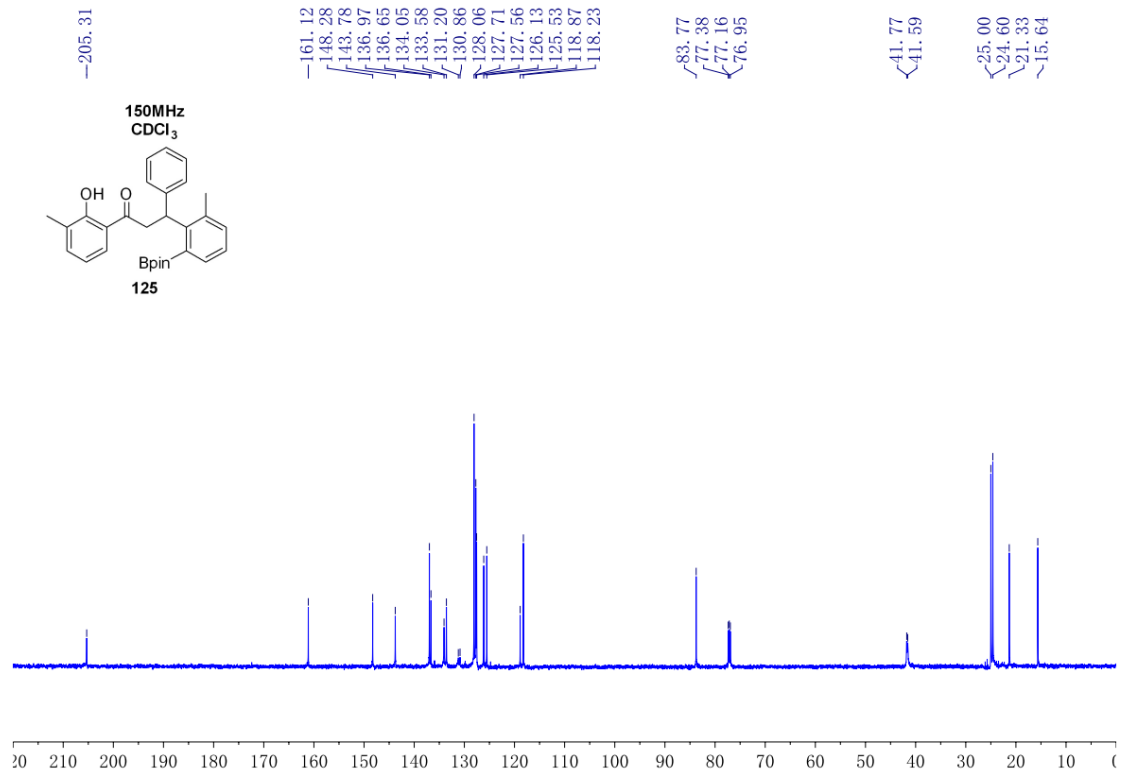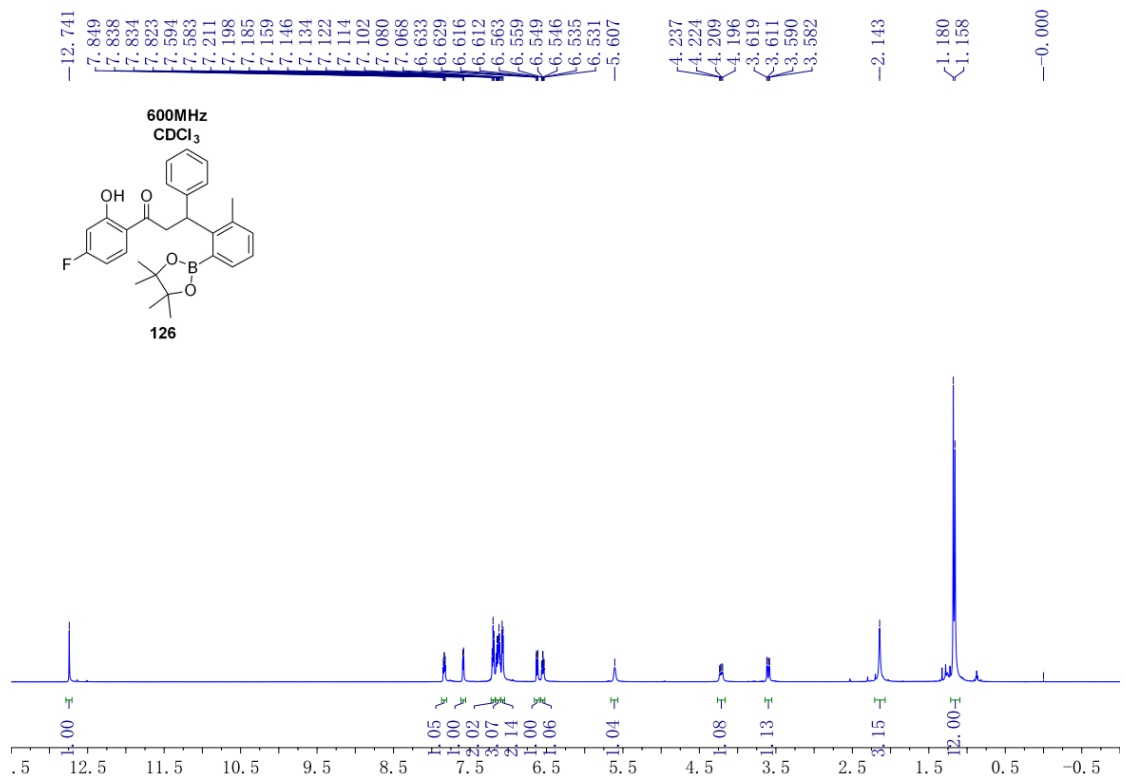

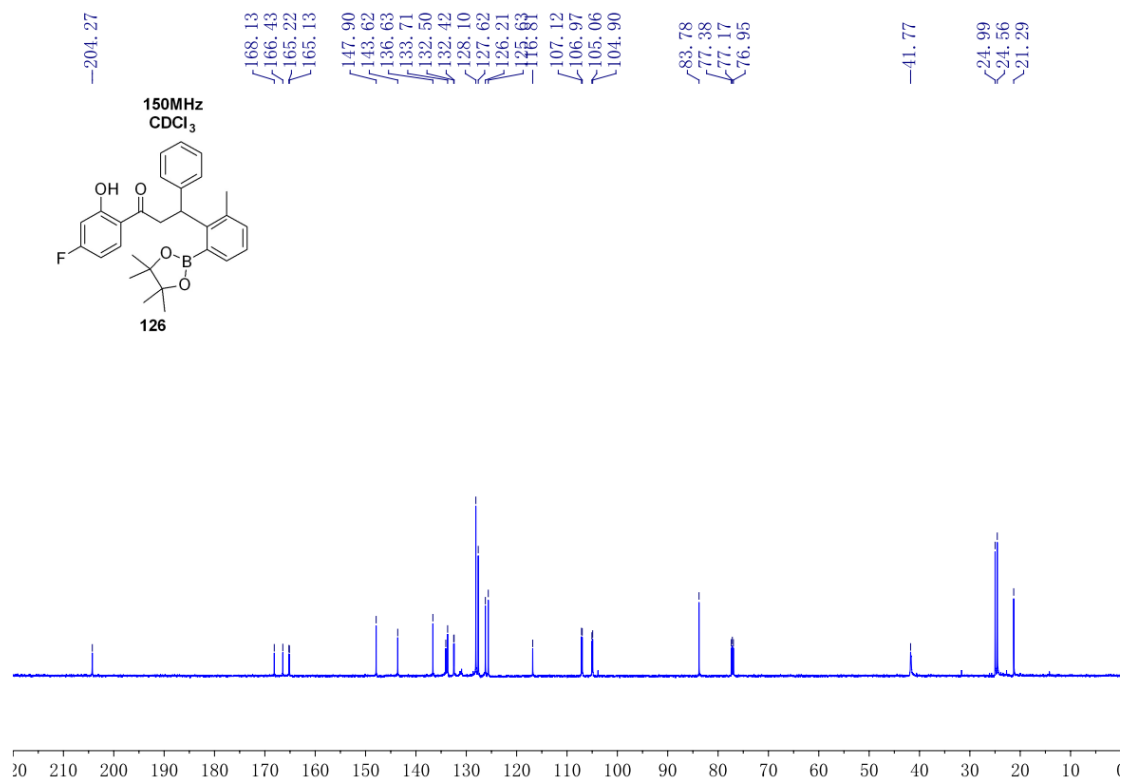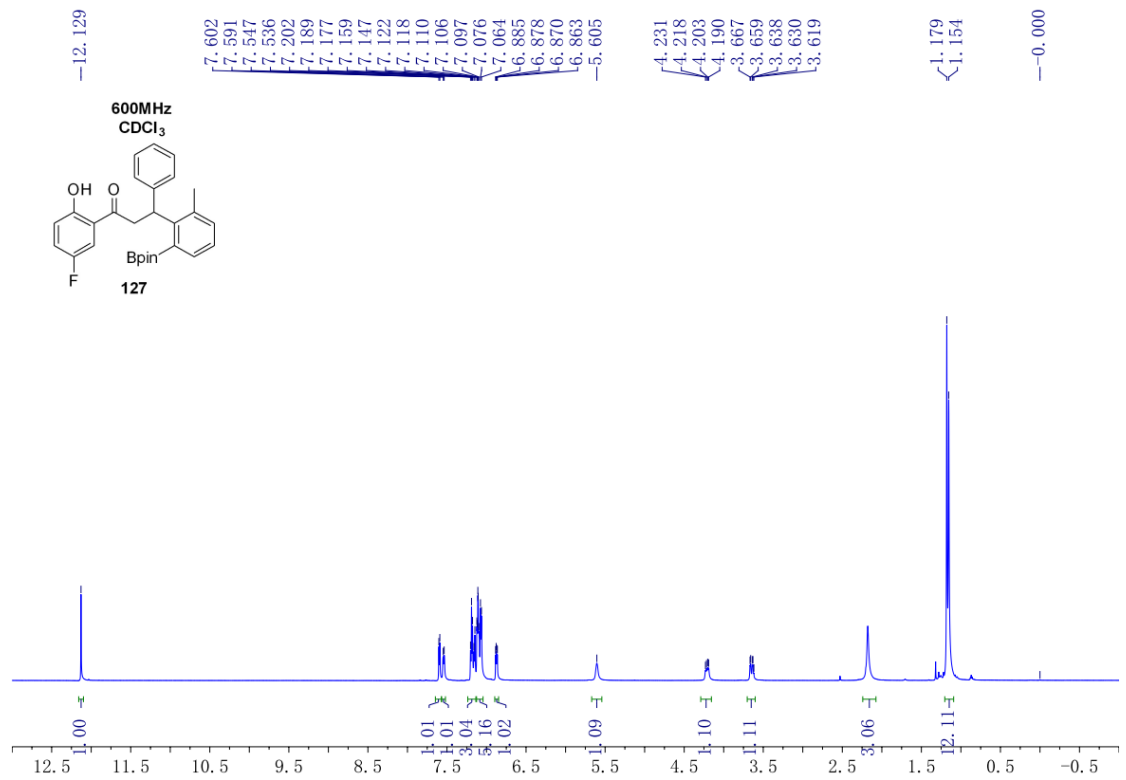

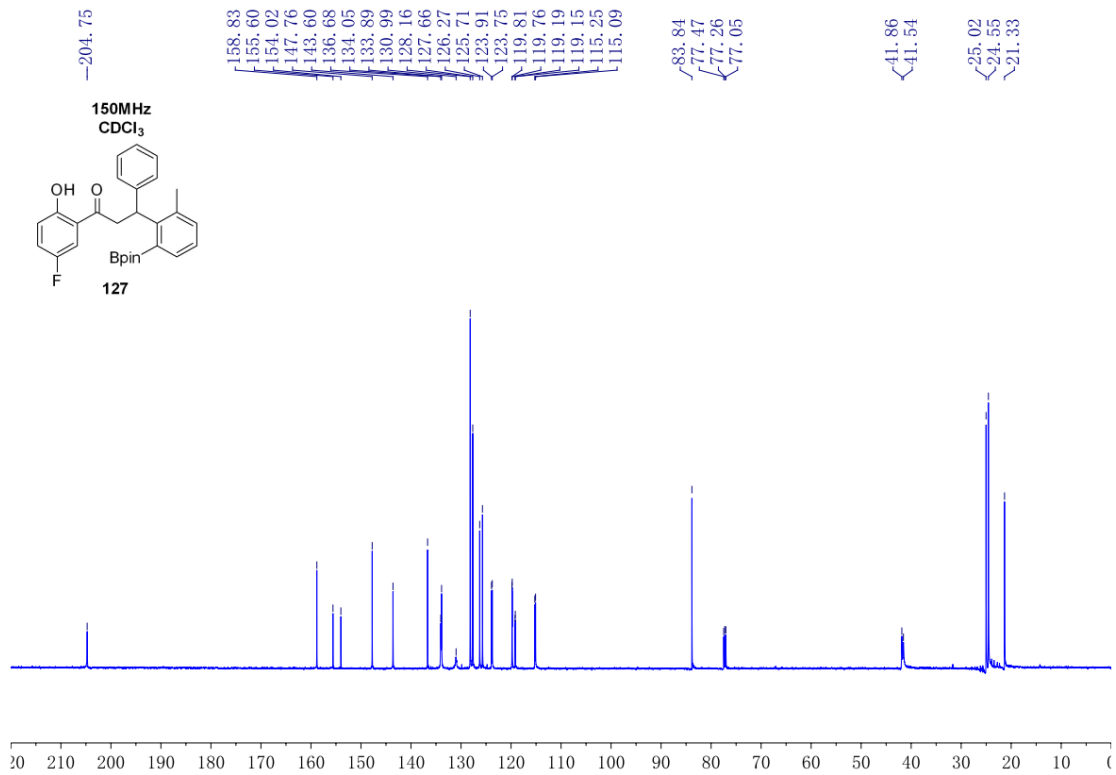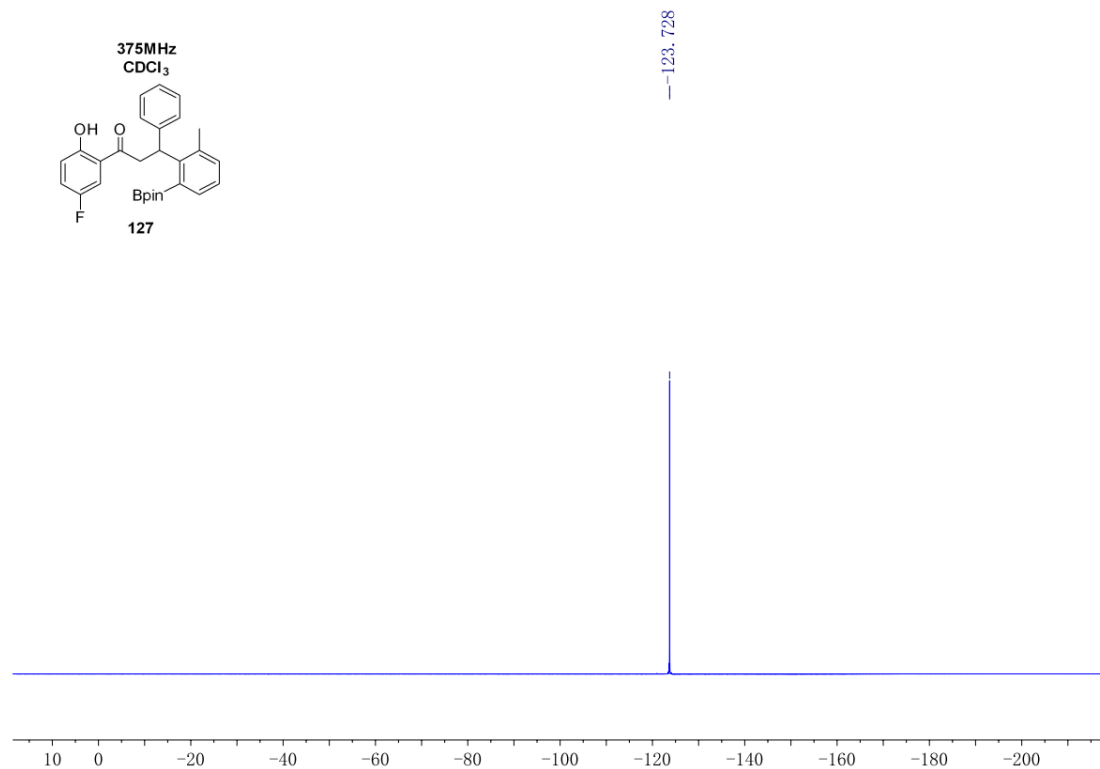

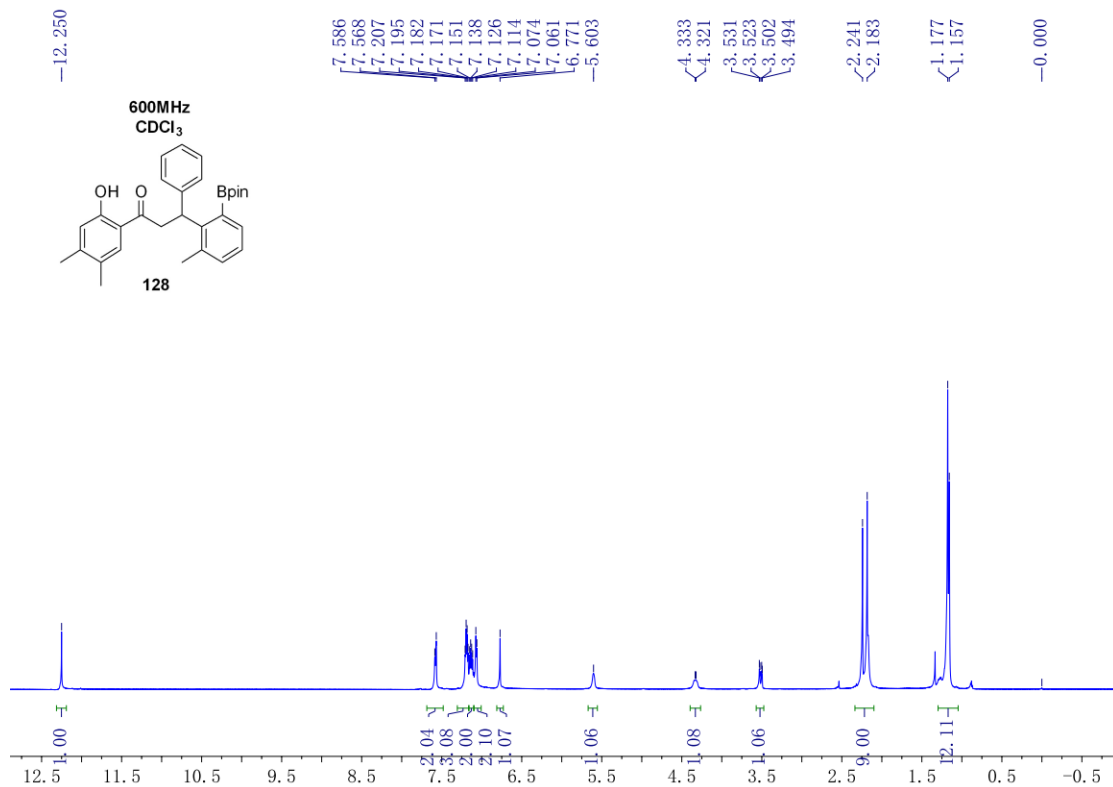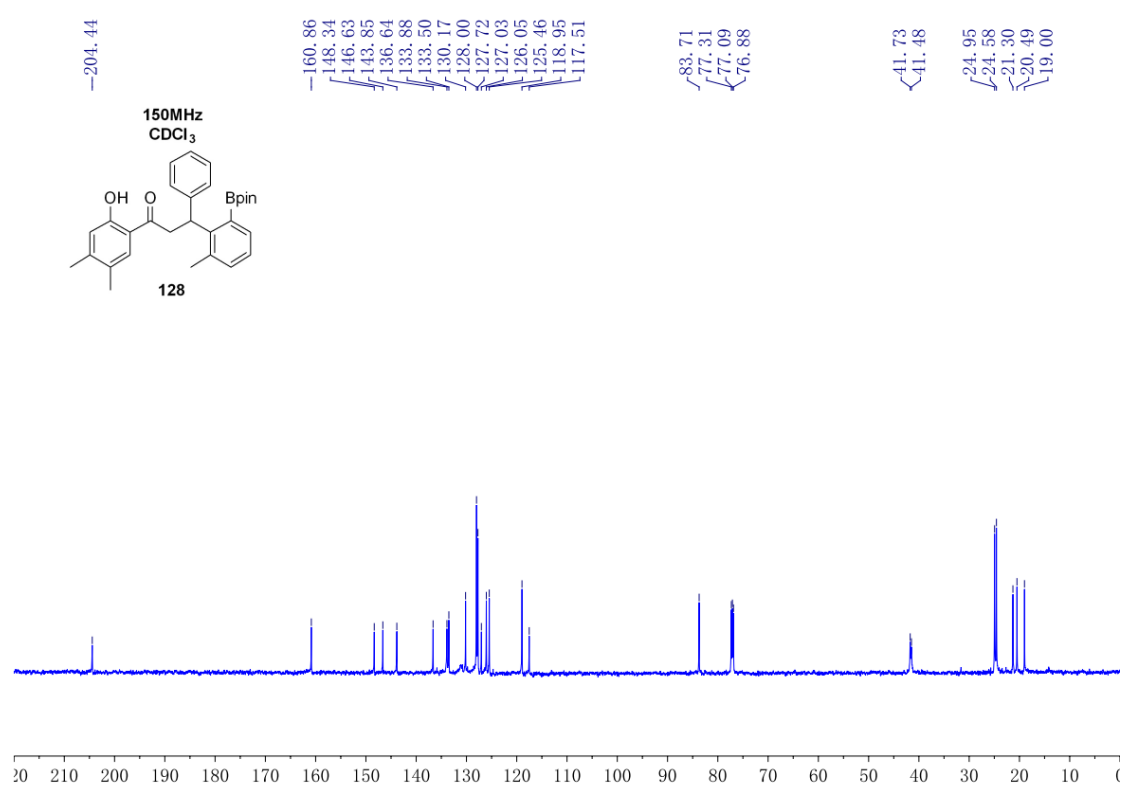



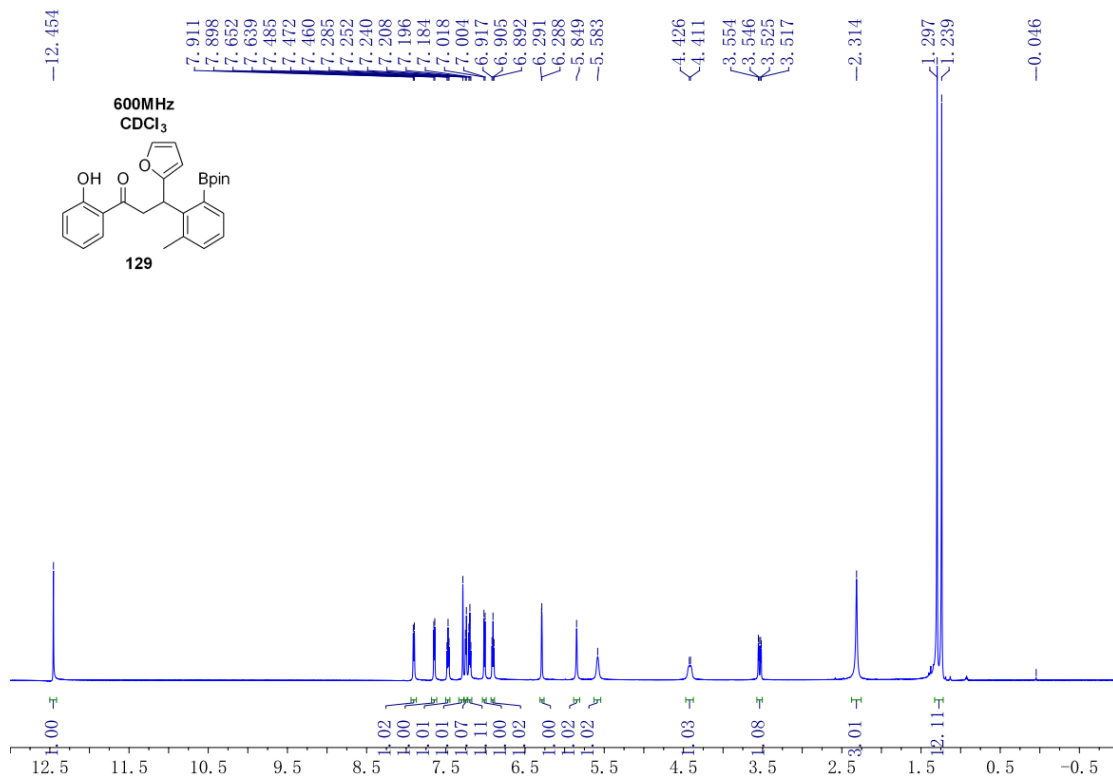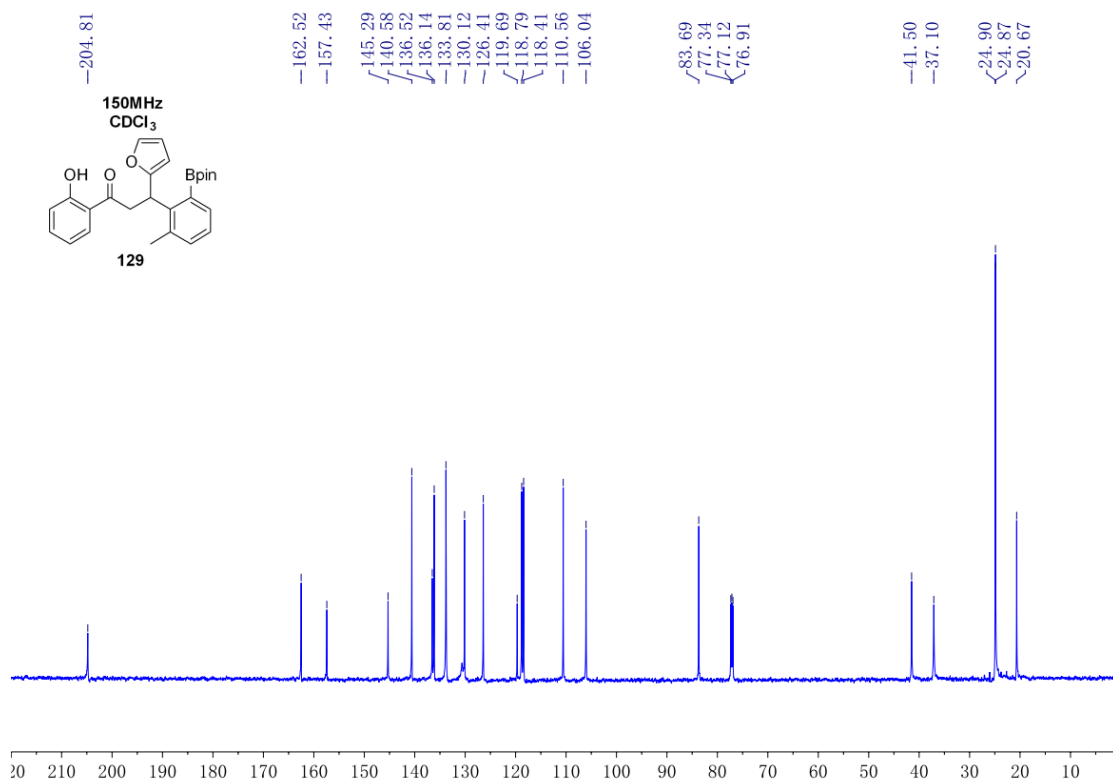

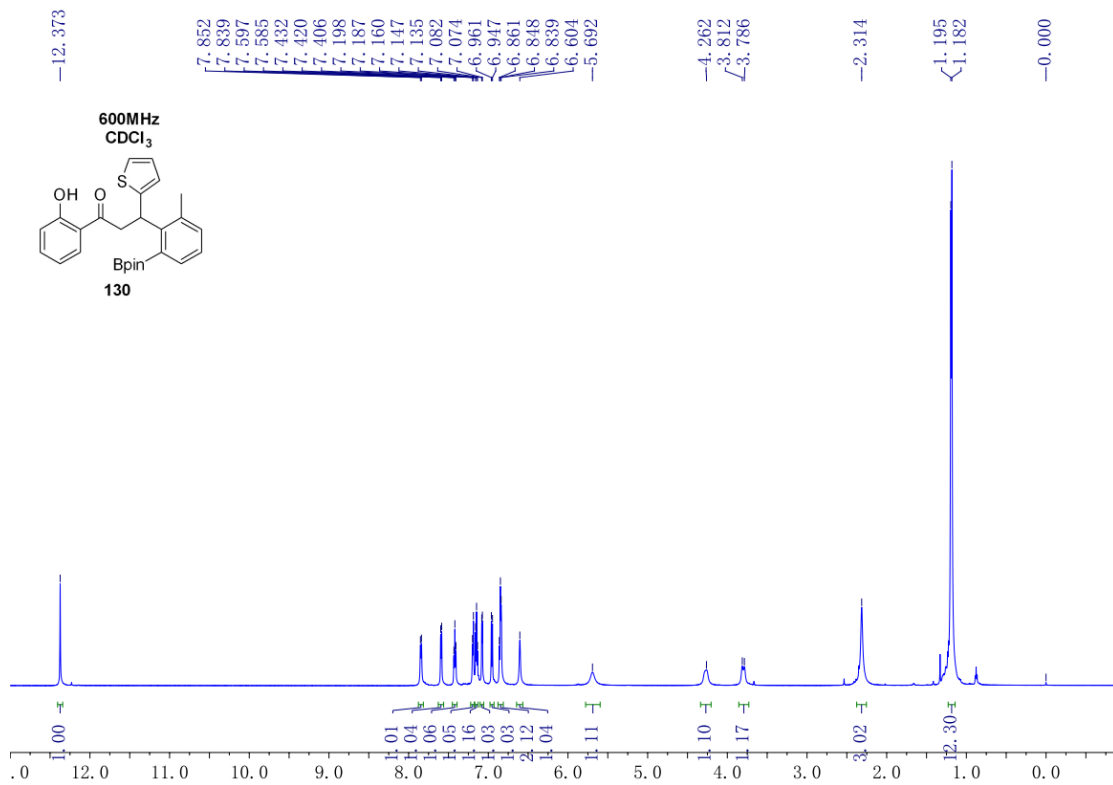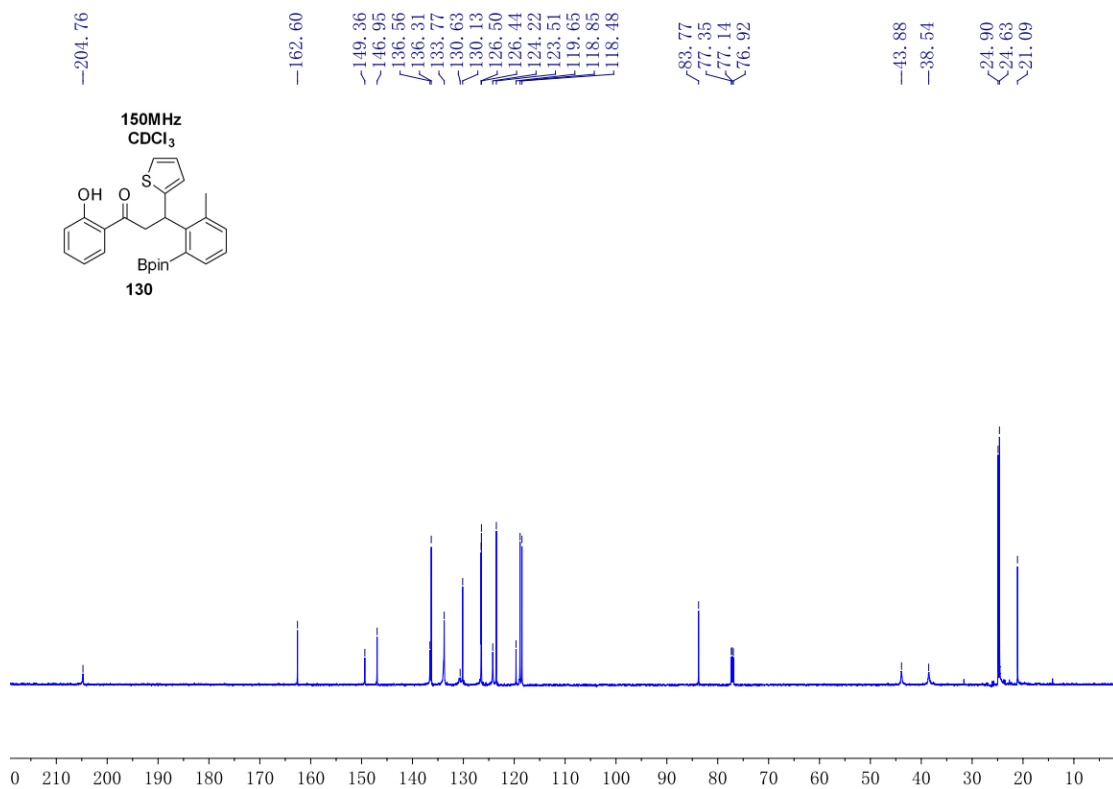

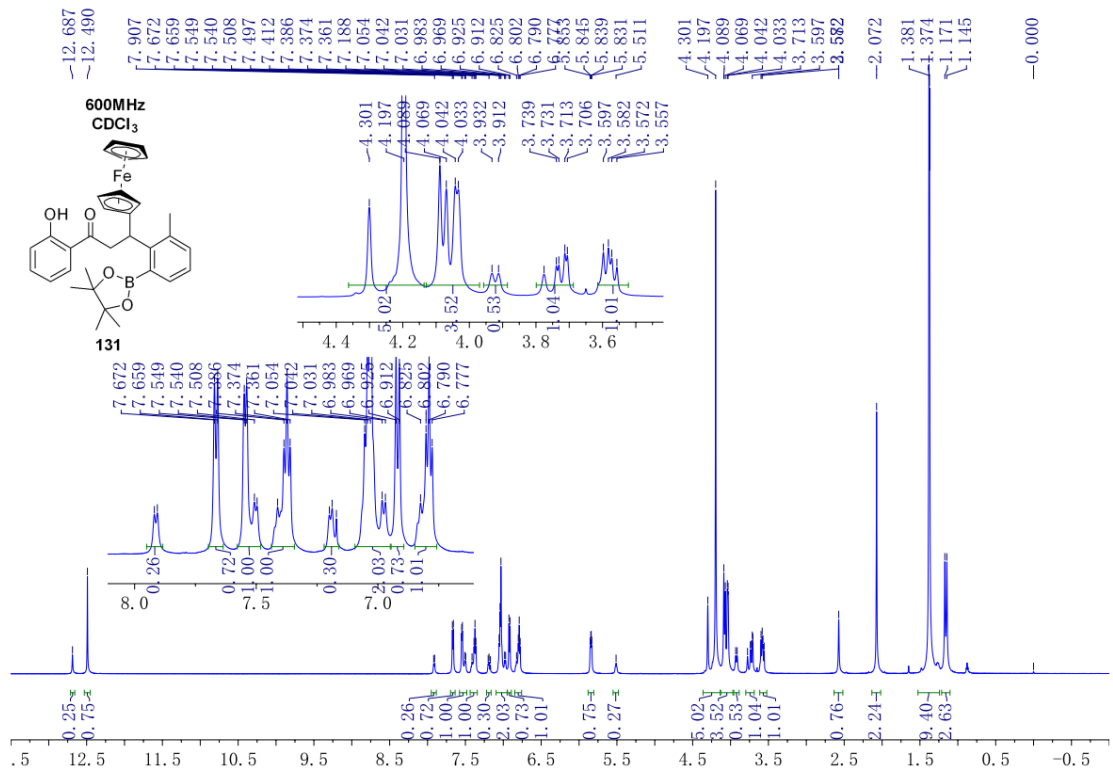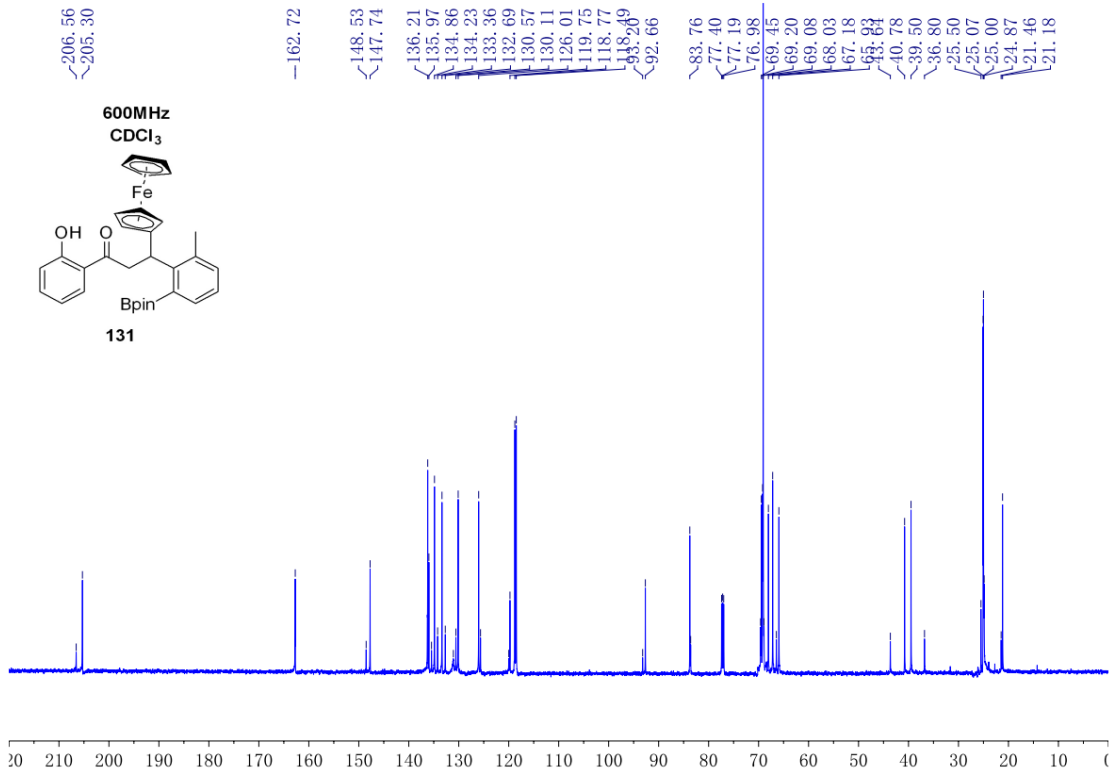

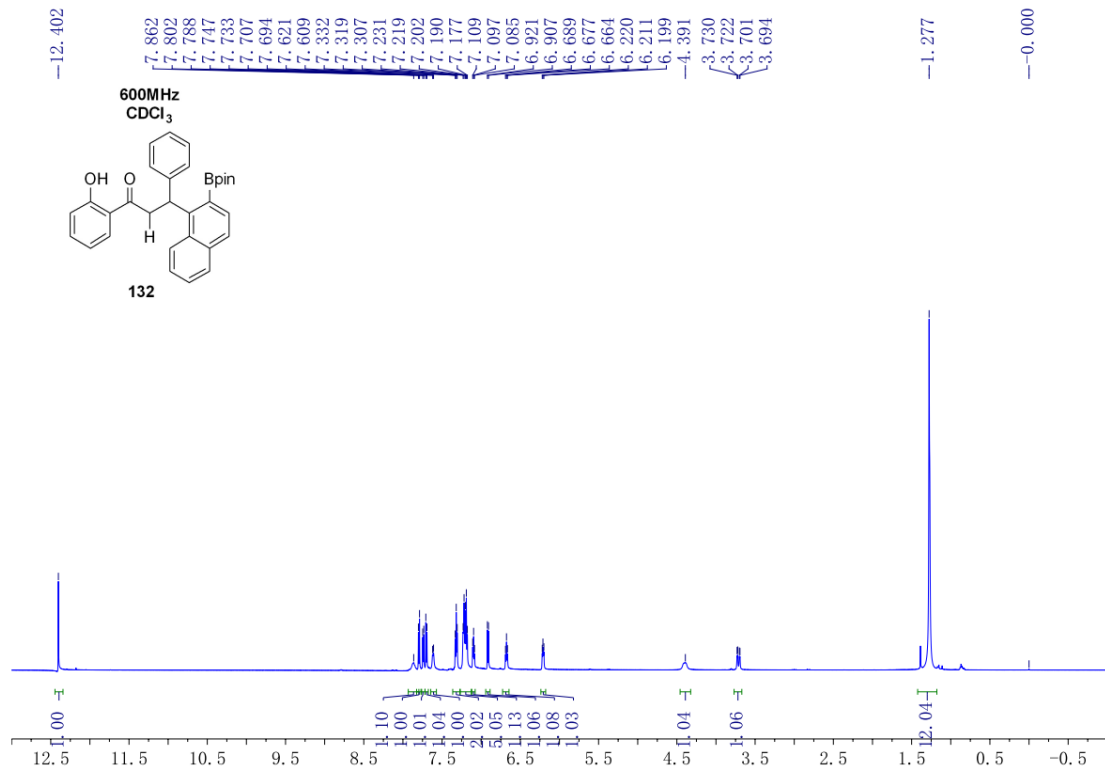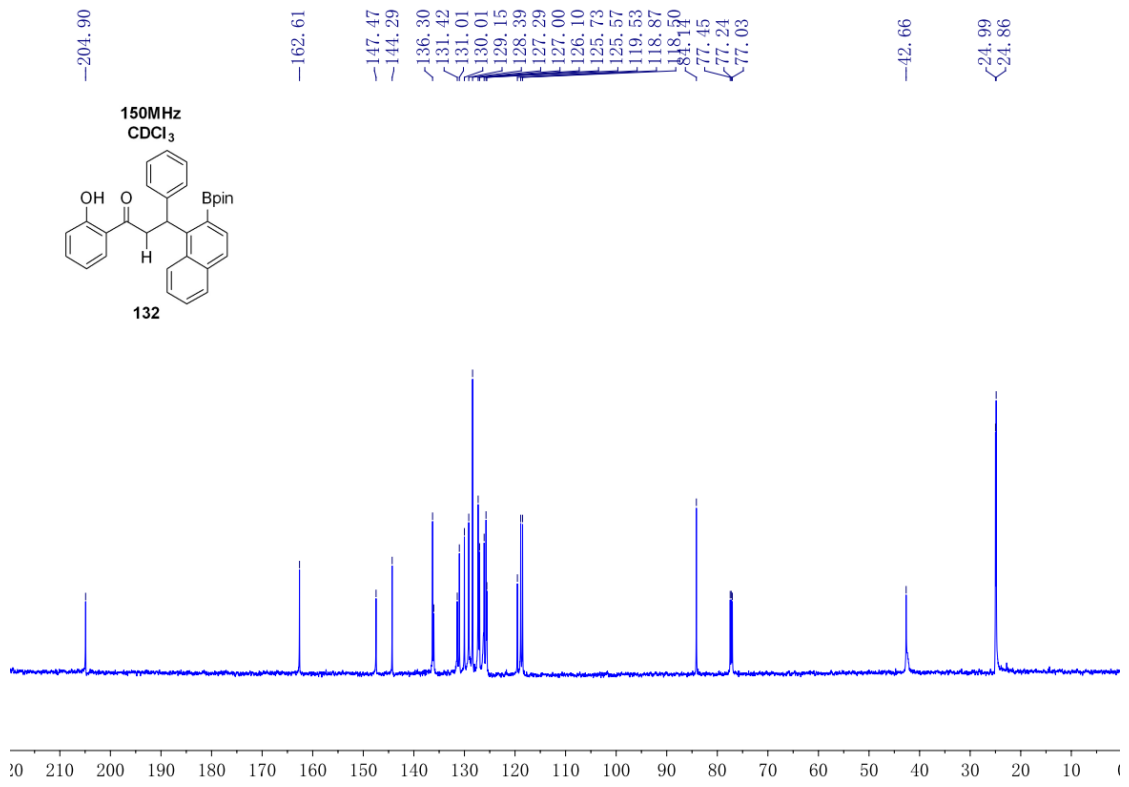

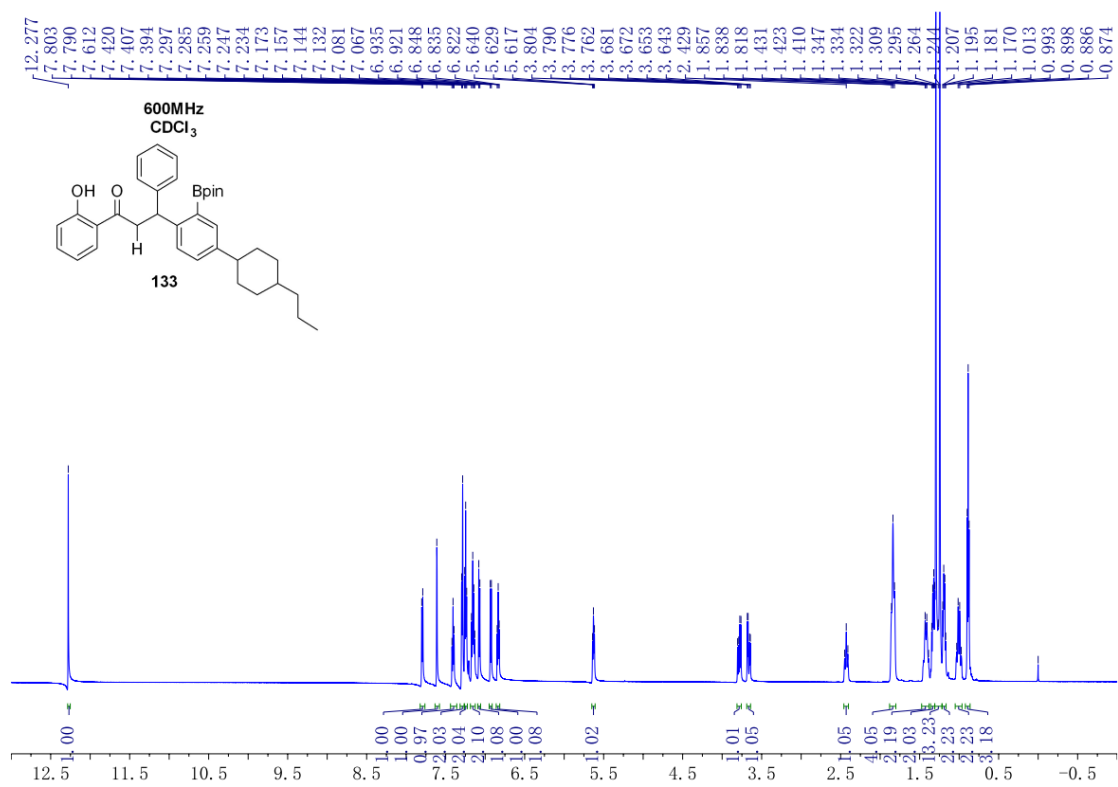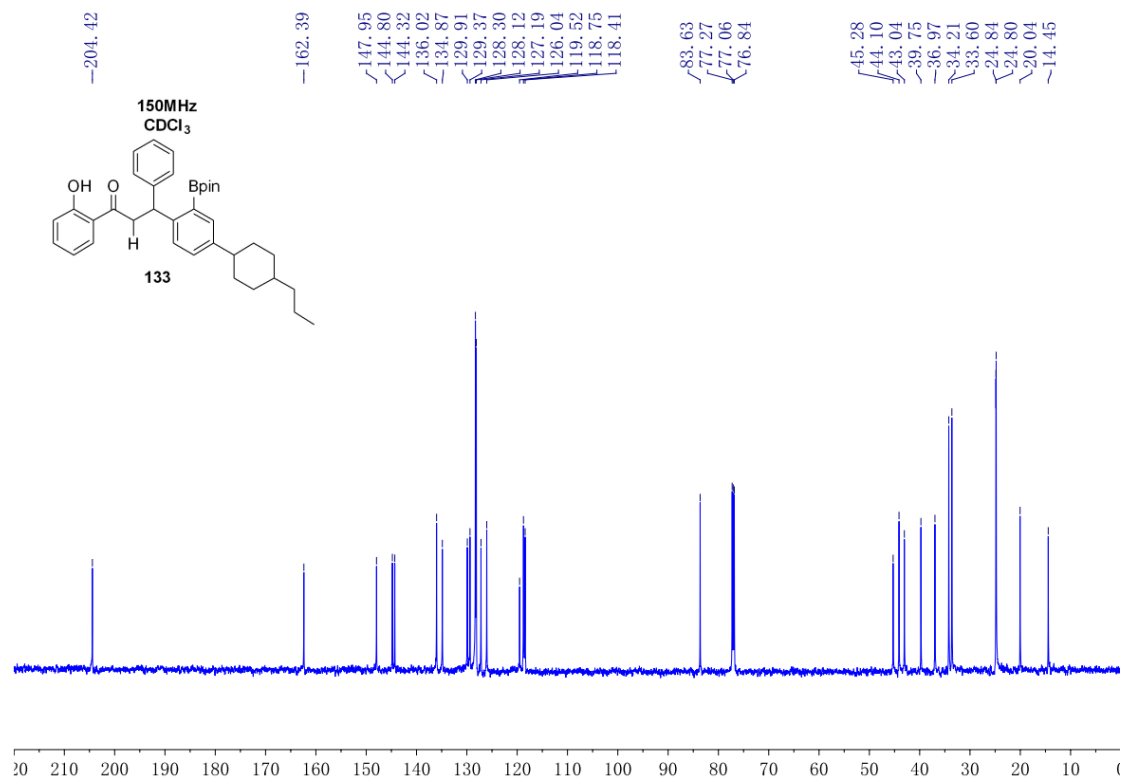

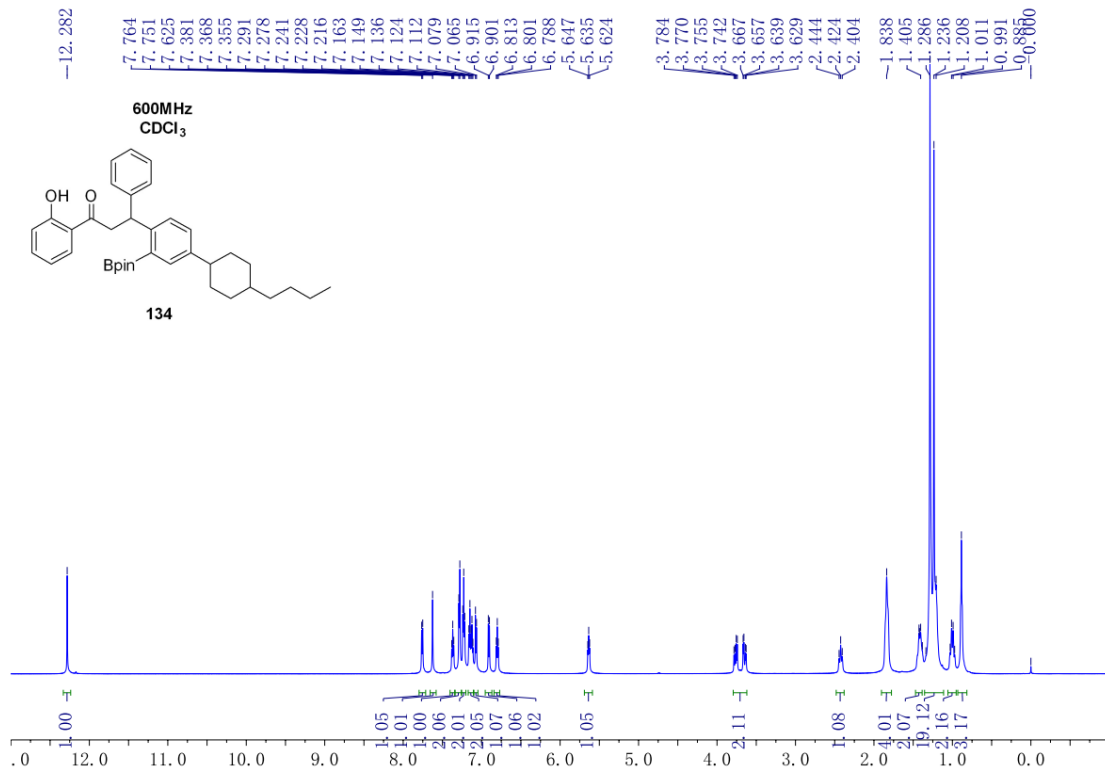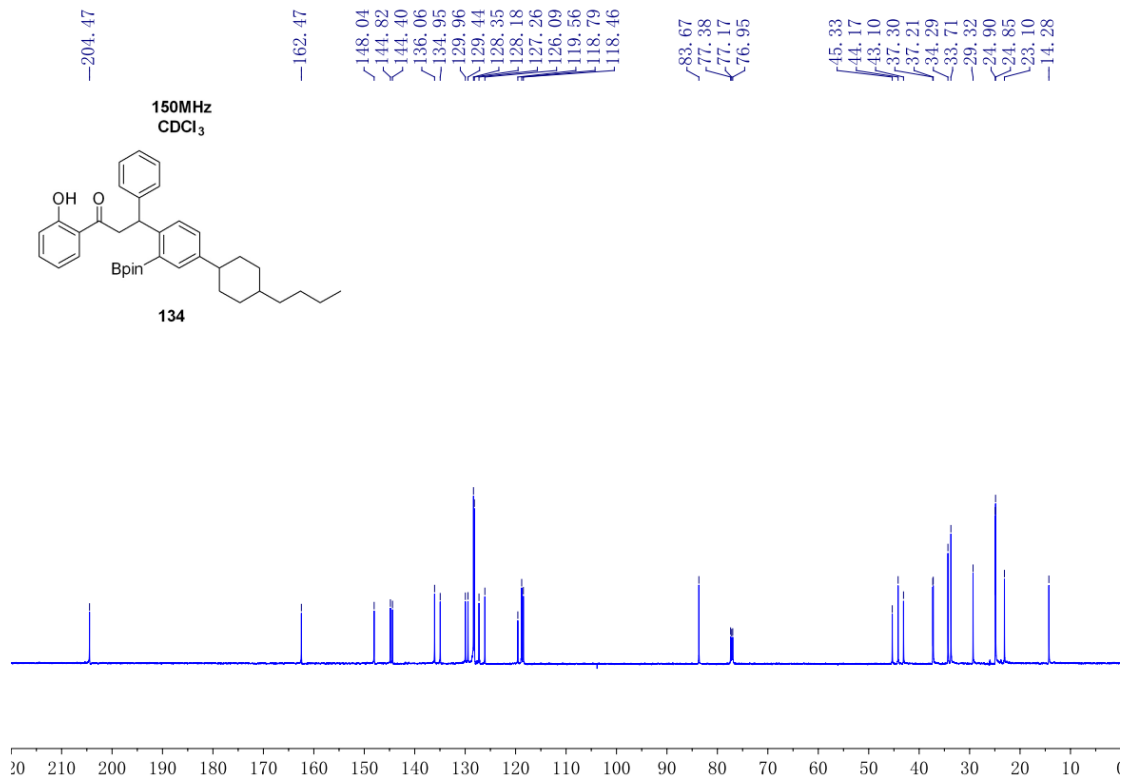

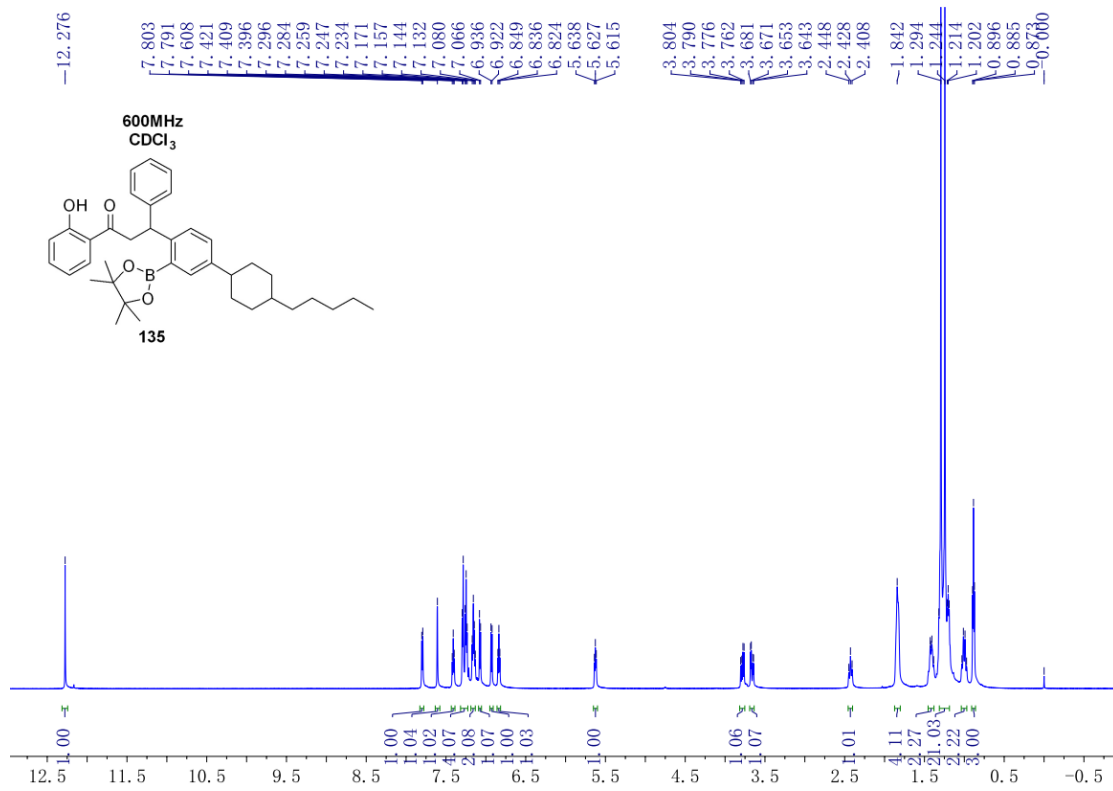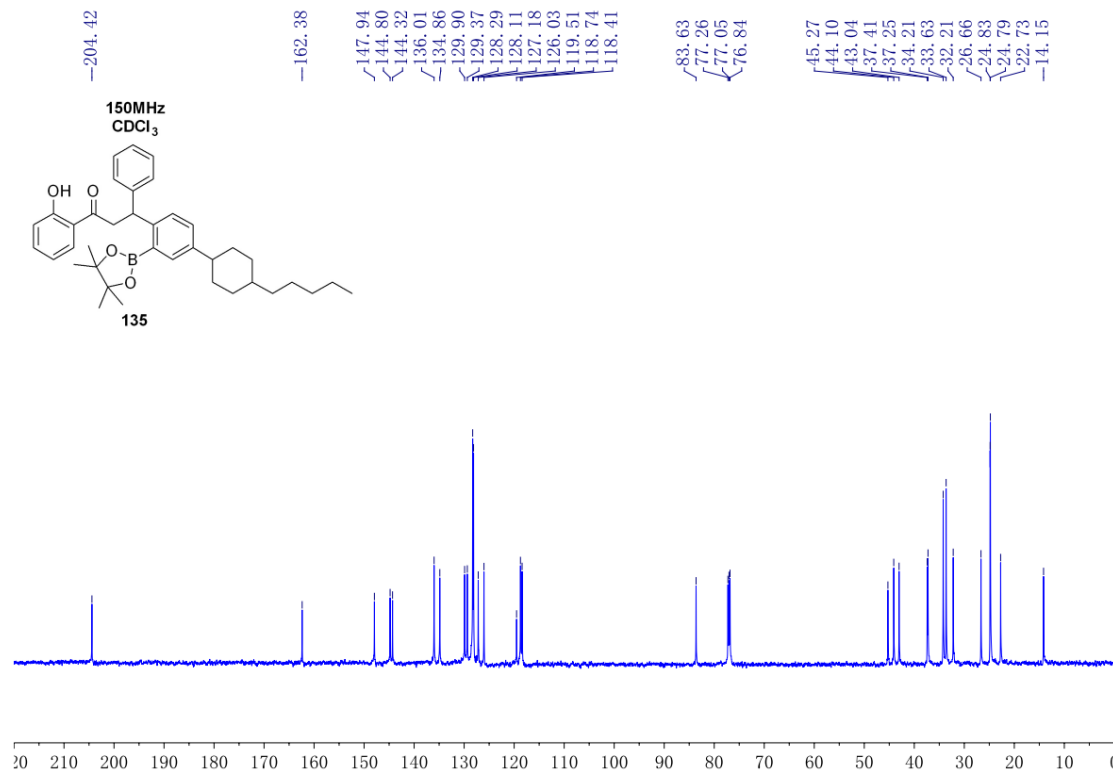

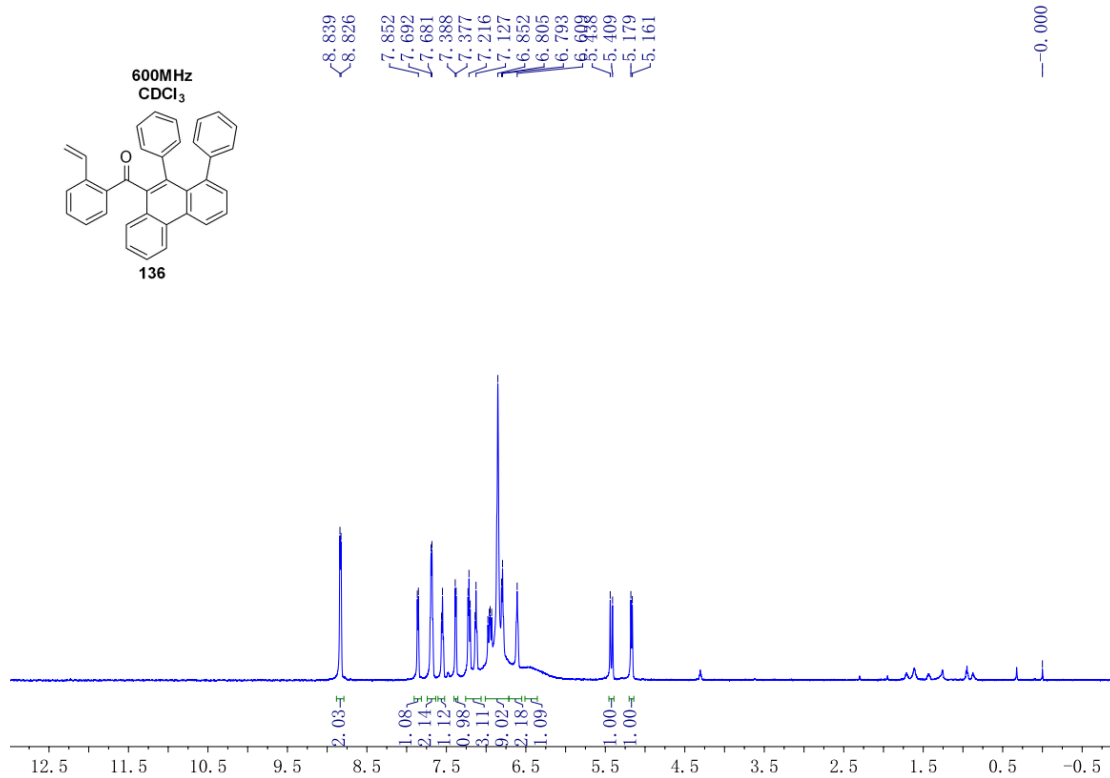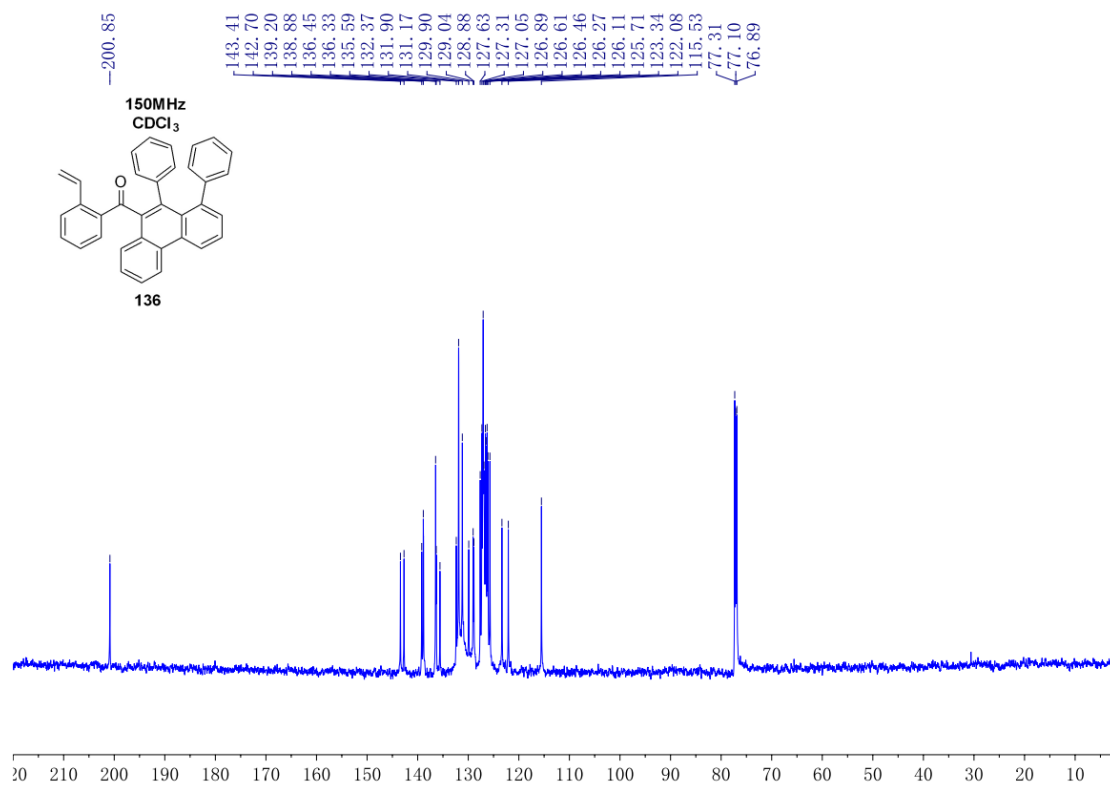



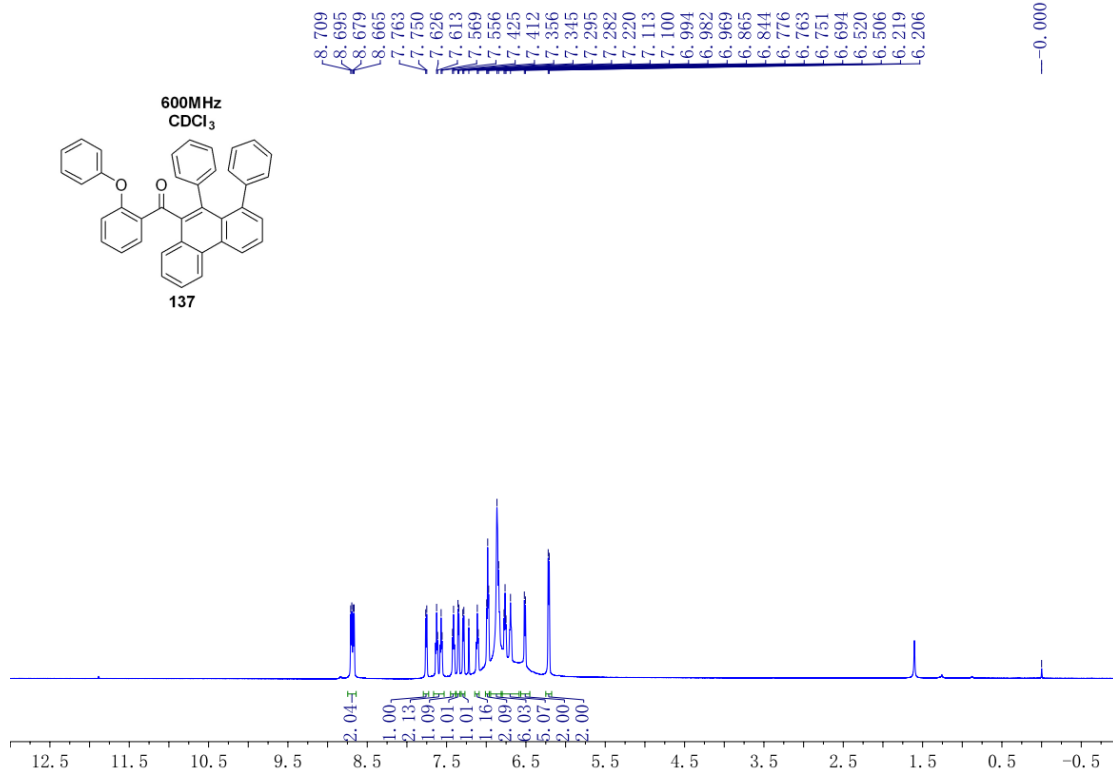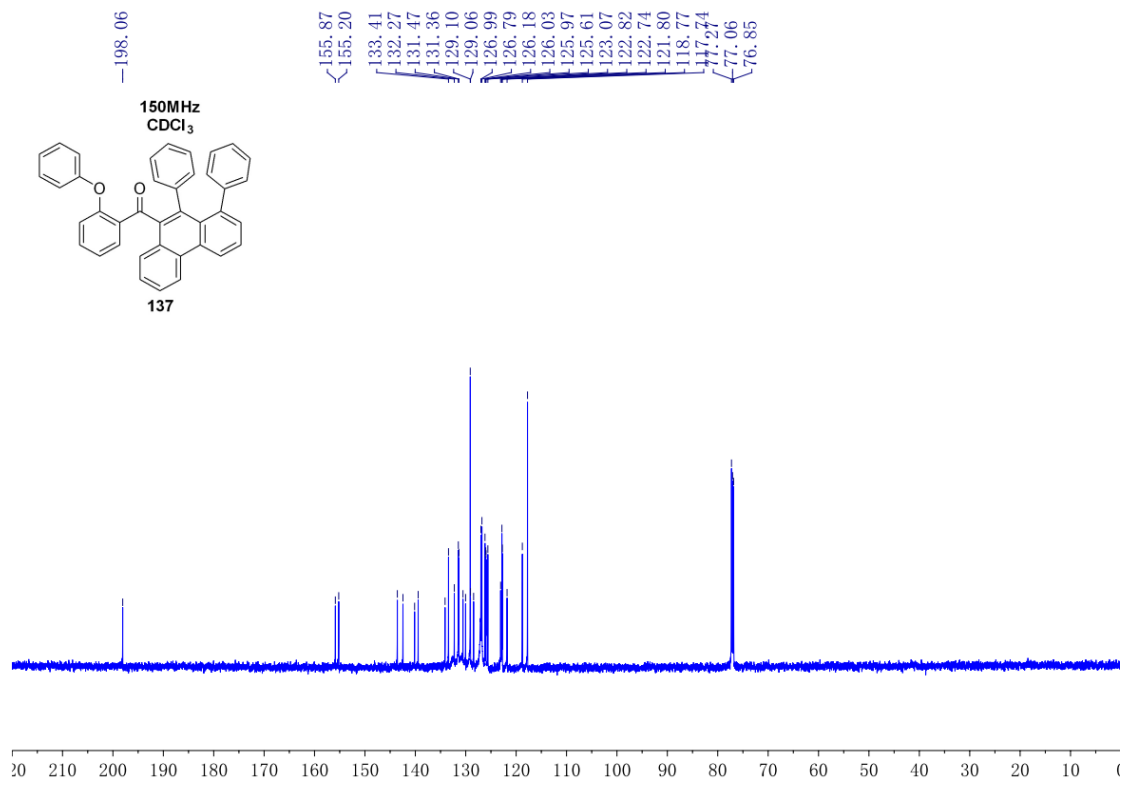

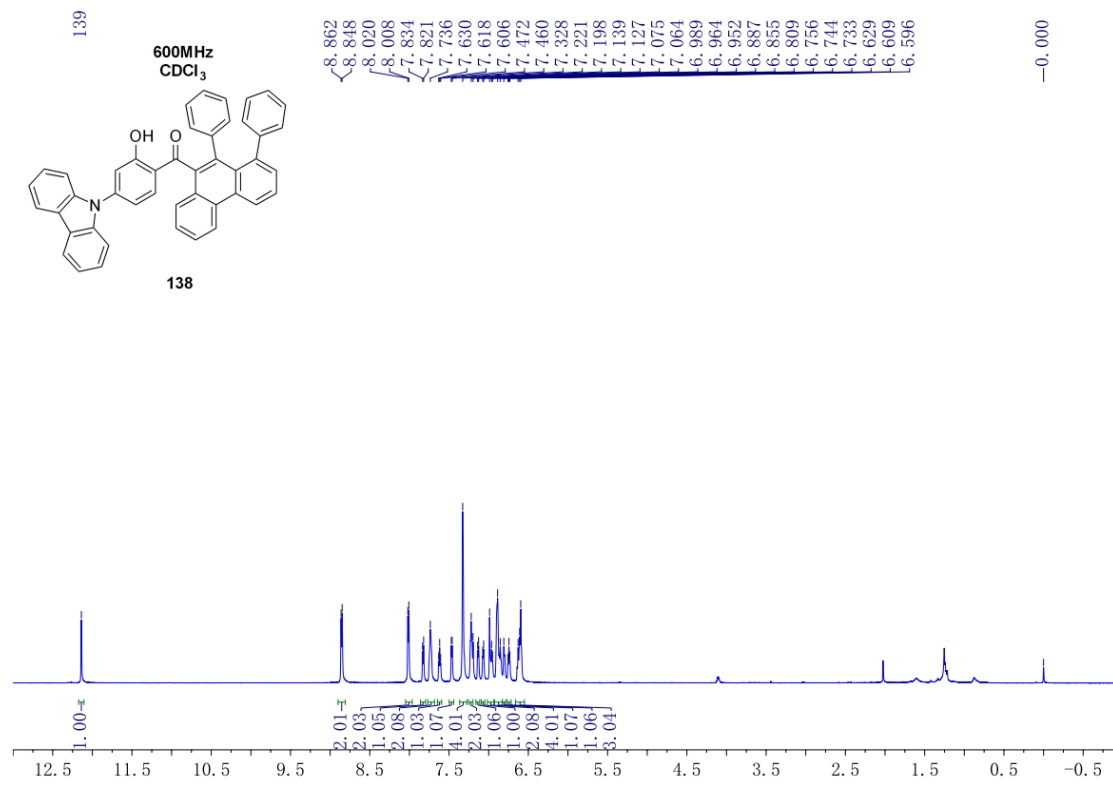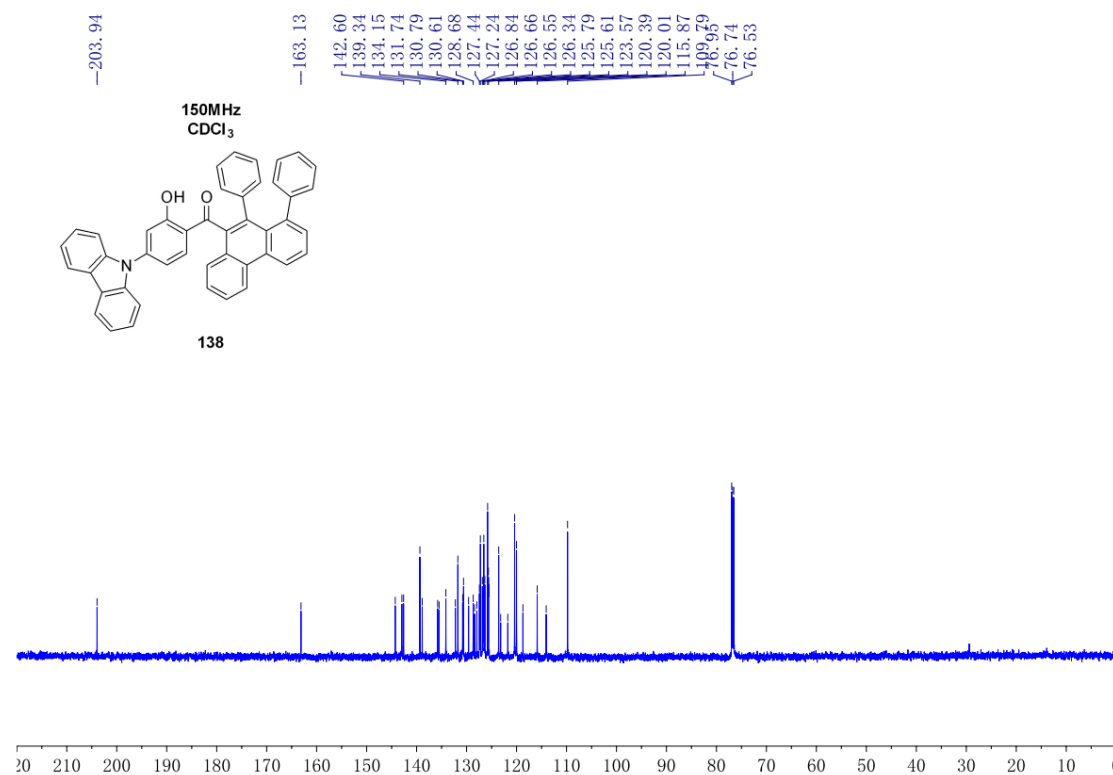

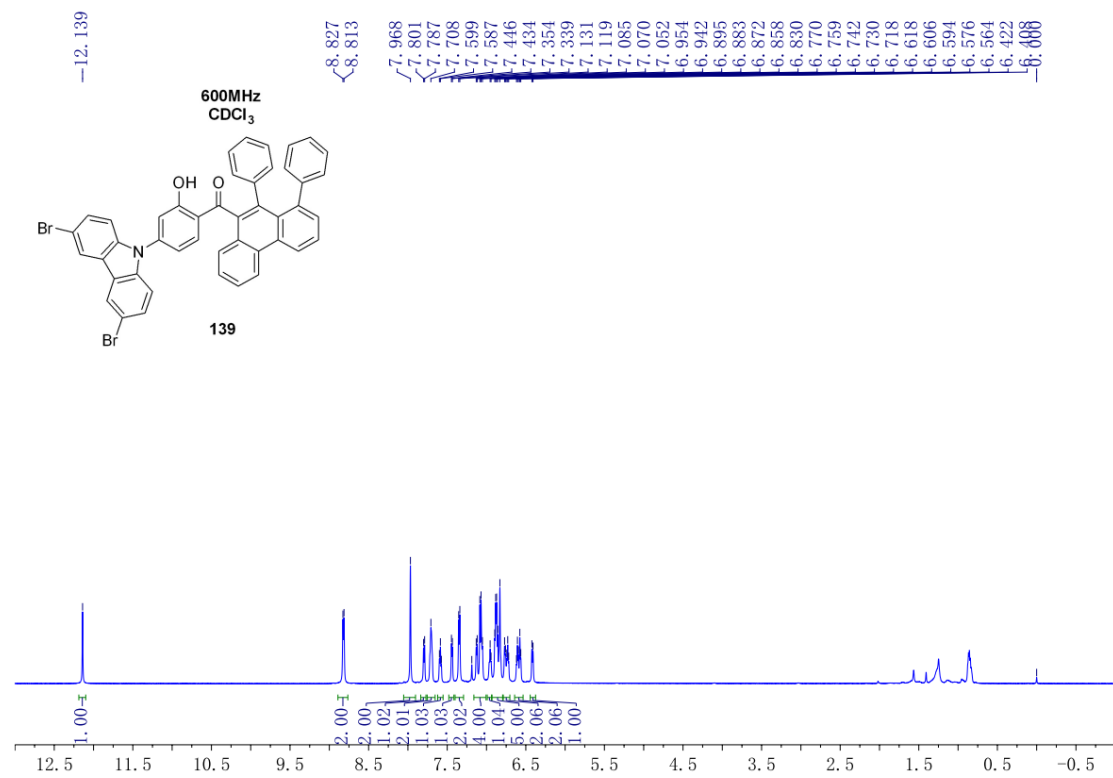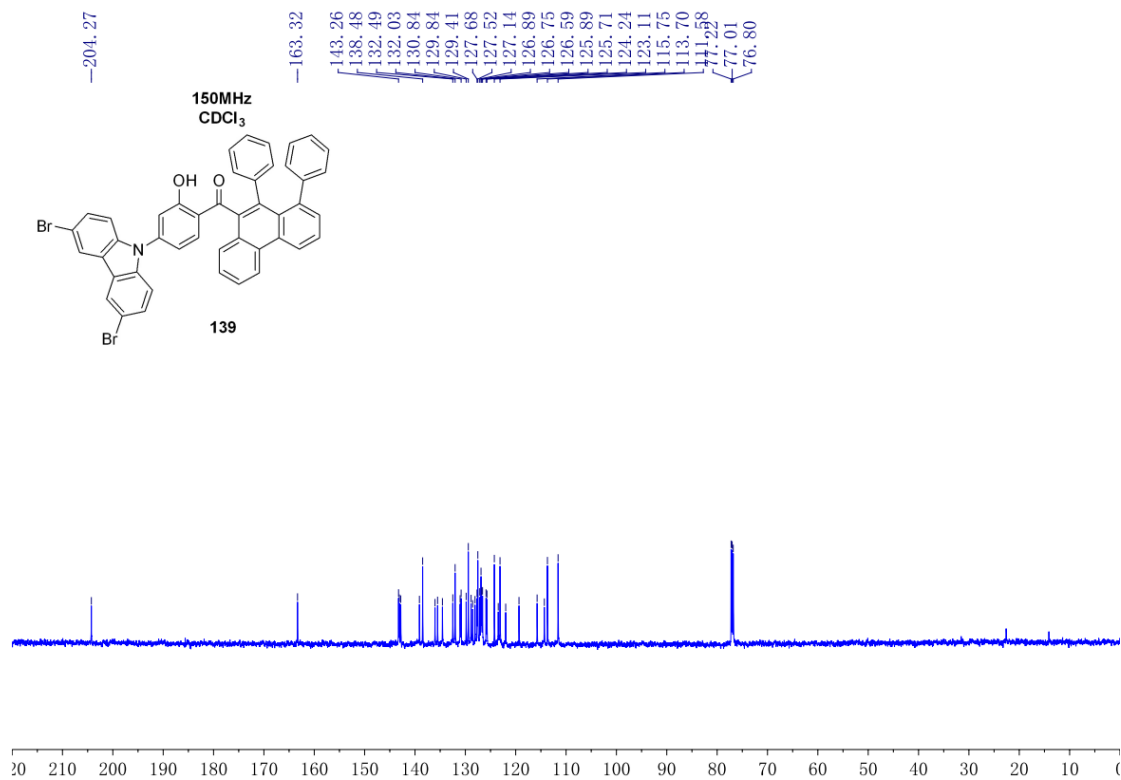

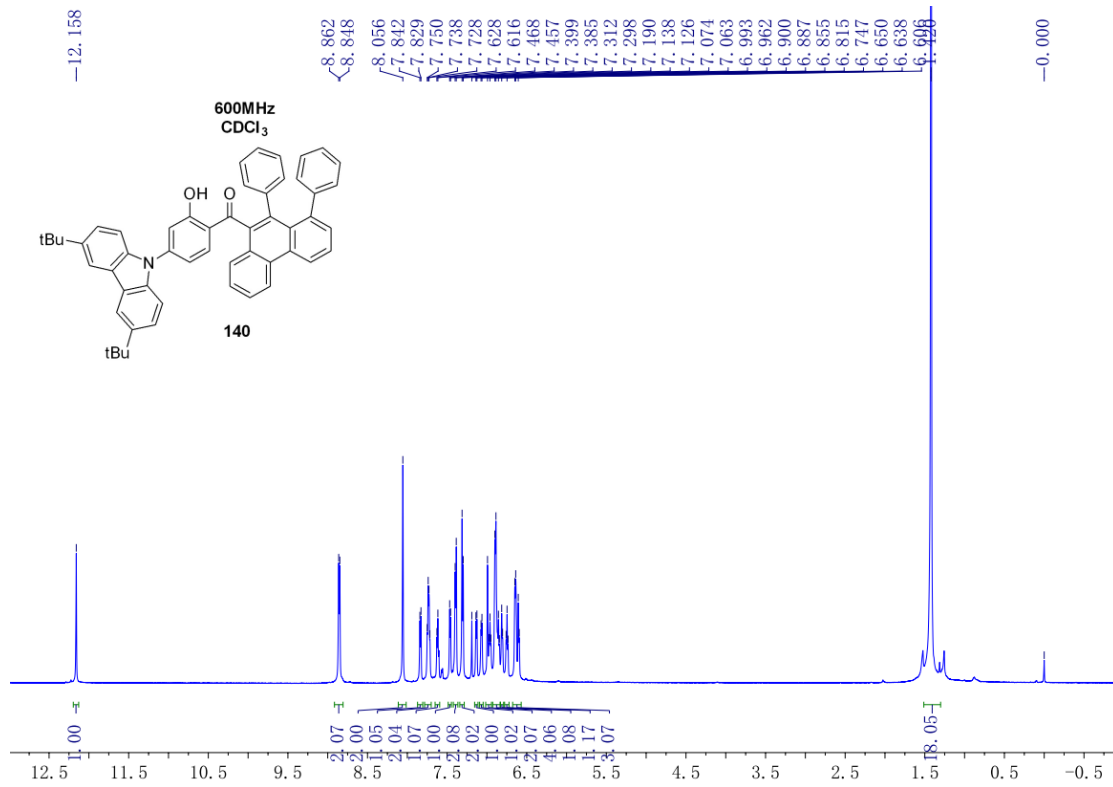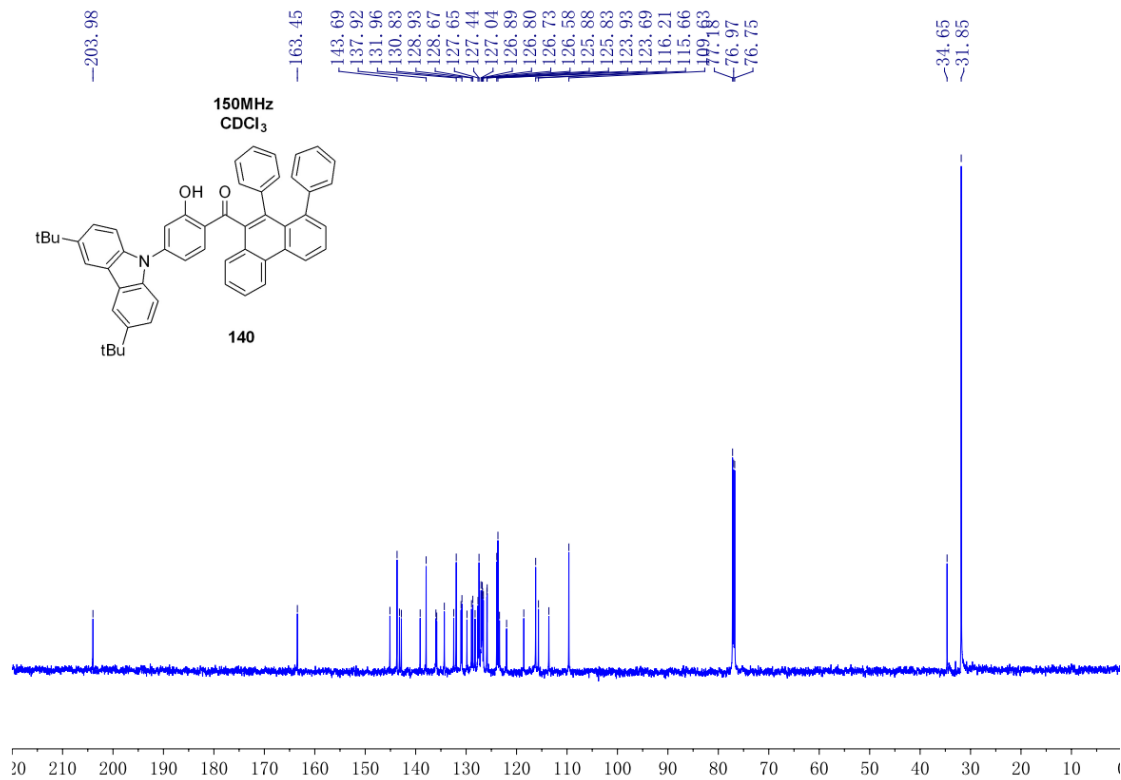

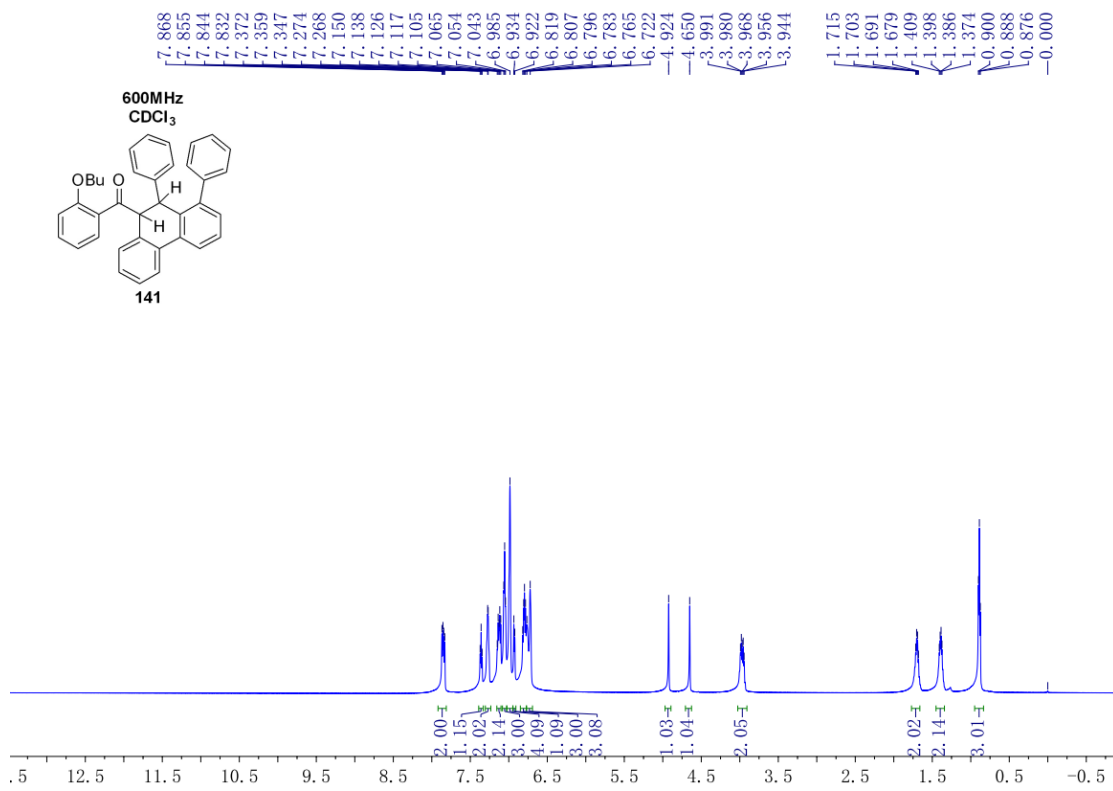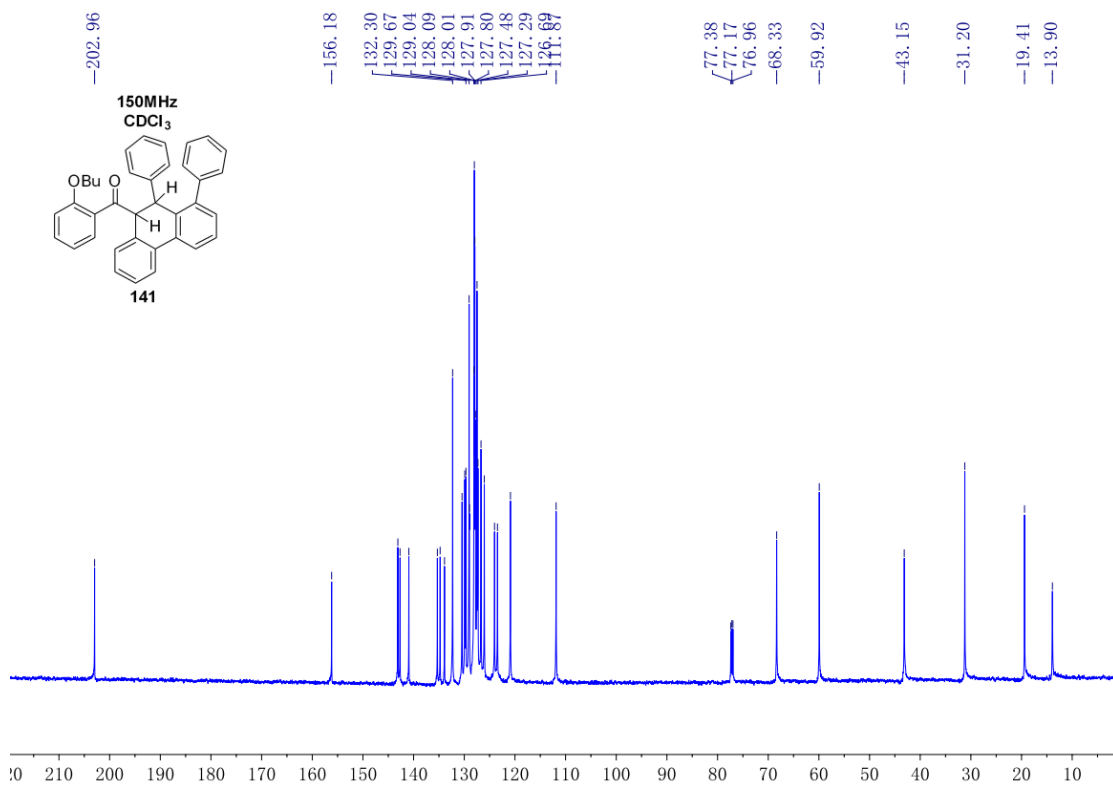

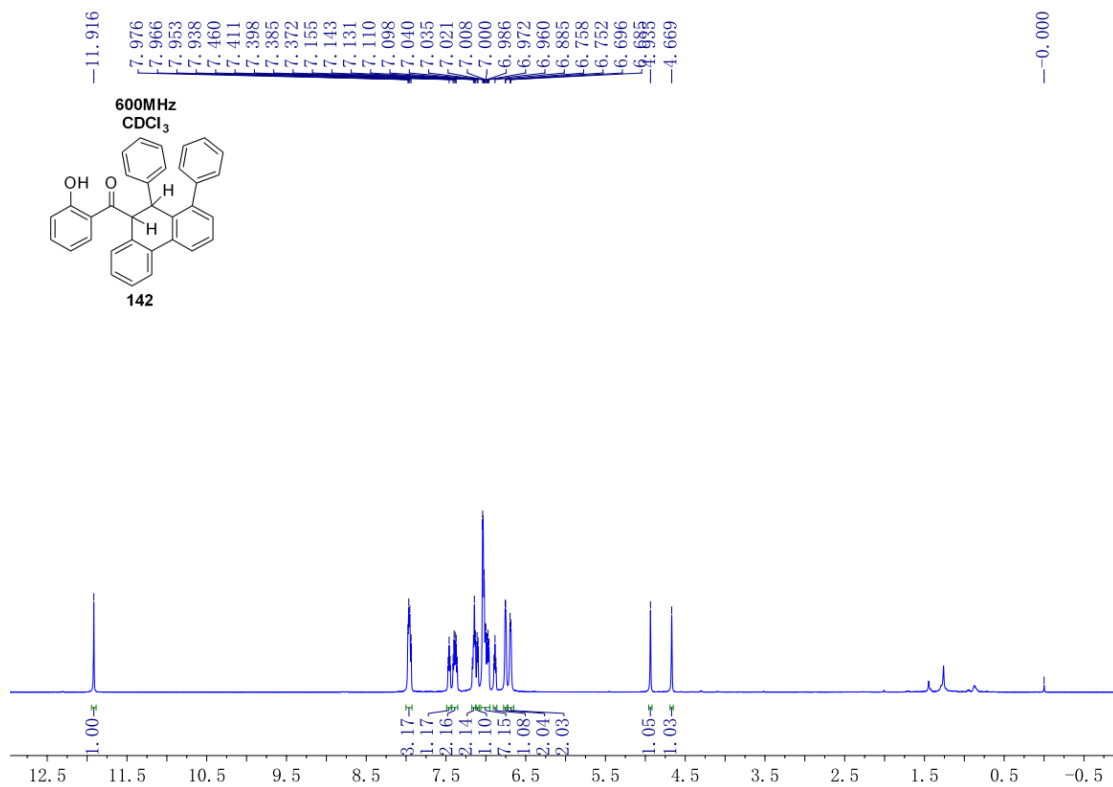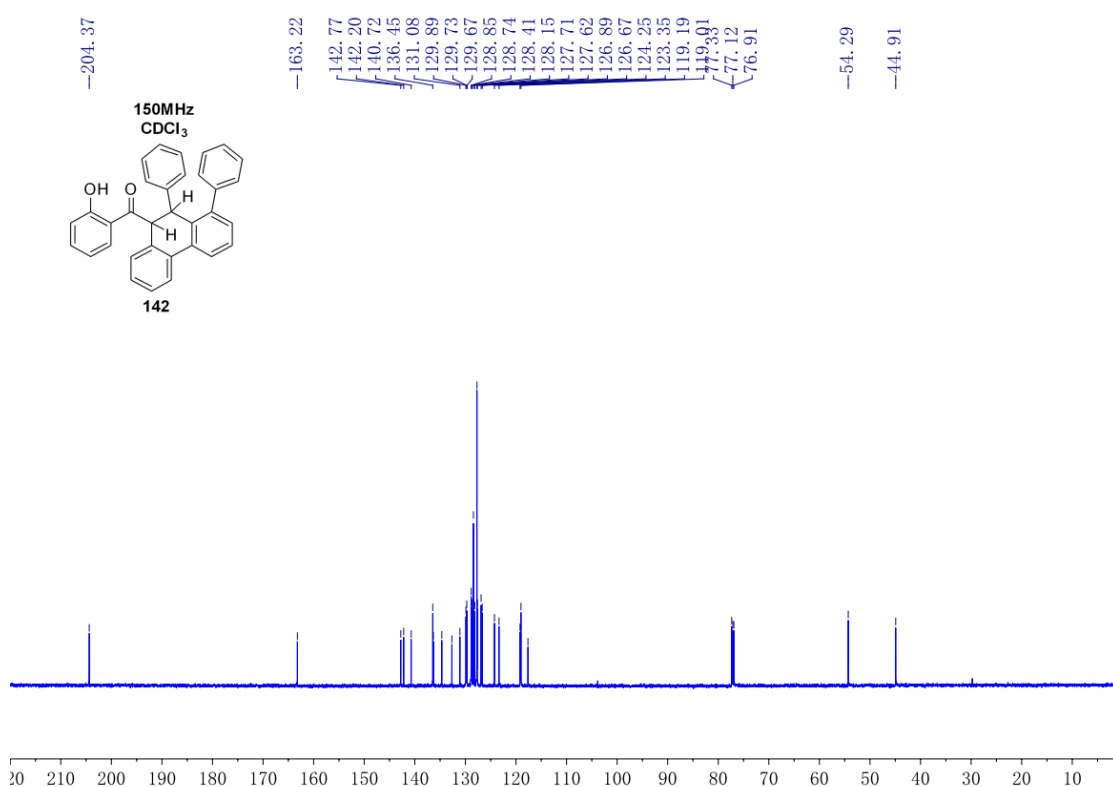

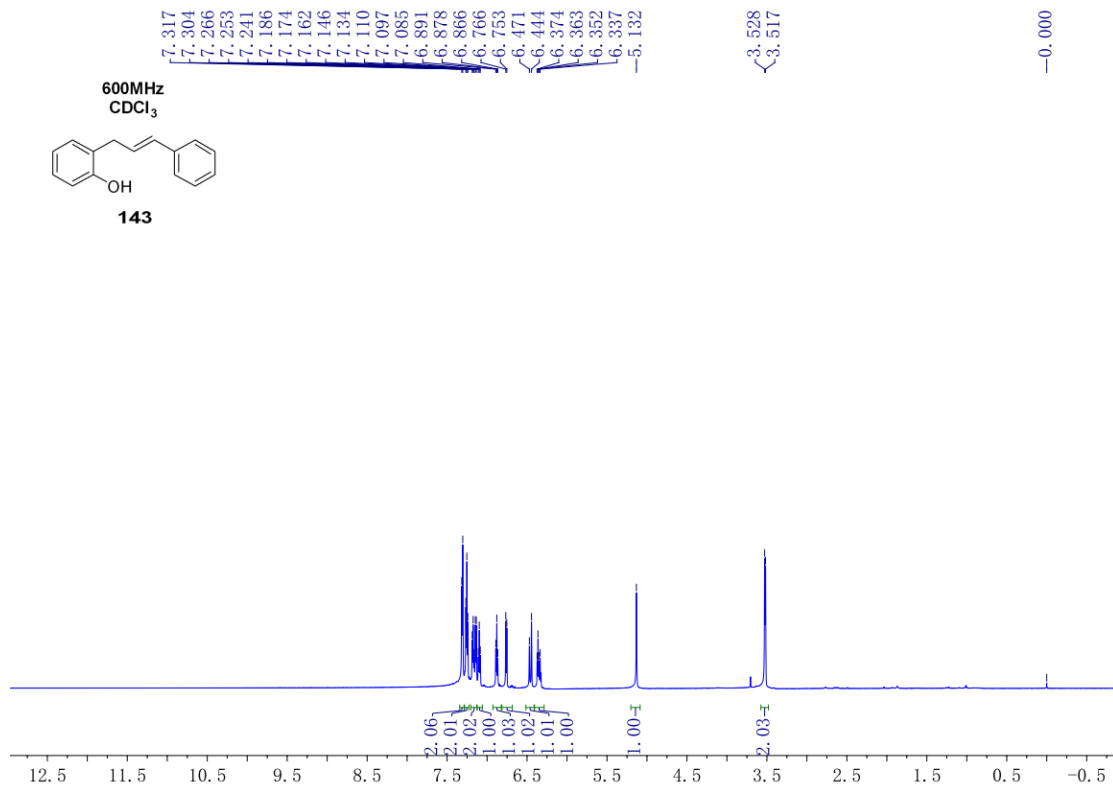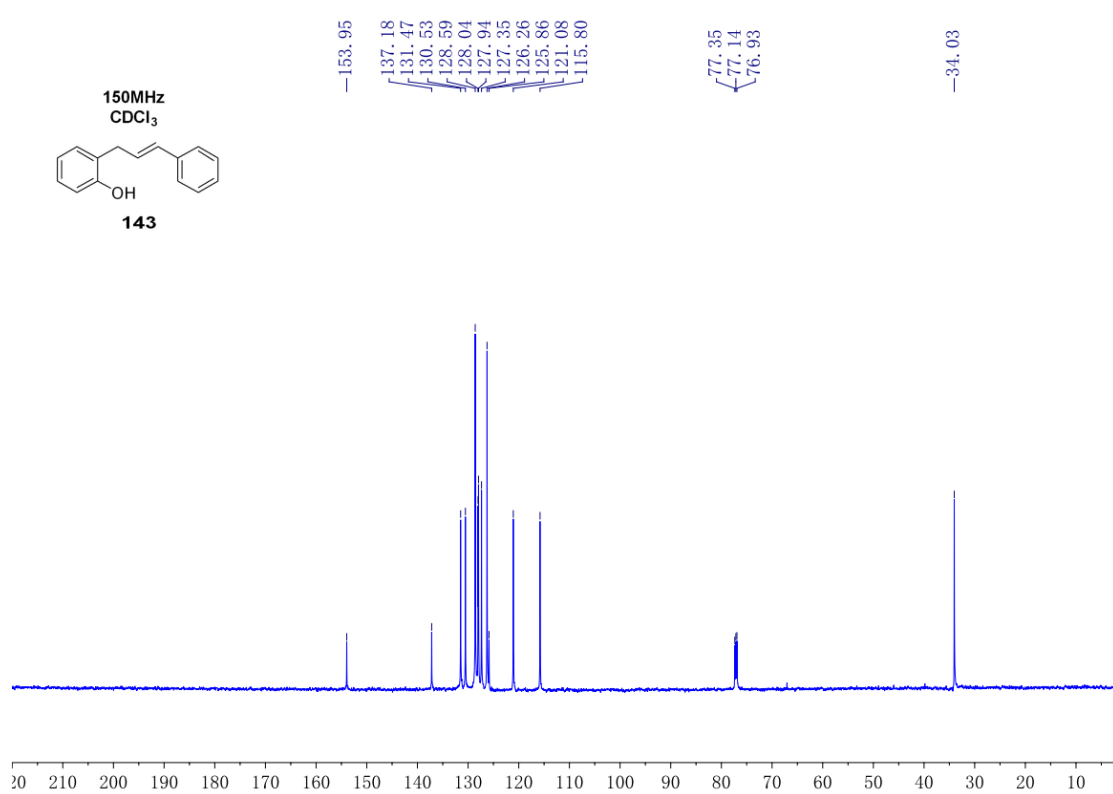

## 5. Supplementary References

- (1) Alcantara, A.-R., Marinas, J.-M. & Sinisterra, J.-V. Synthesis of 2'-hydroxychalcones and related compounds in interfacial solid-liquid conditions. *Tetrahedron Letters*, **28**, 1515-1518 (1987).
- (2) Muller, B.-M., Litberg, T.-J. & Adler, M.-J. Extended Aromatic and Heteroaromatic Ring Systems in the Chalcone–Flavanone Molecular Switch Scaffold. *J. Org. Chem.* **81**, 5775-5781 (2016).
- (3) Bhunia, A., Patra, A. & Biju, A.T. NHC-Catalyzed Reaction of Enals with Hydroxy Chalcones: Diastereoselective Synthesis of Functionalized Coumarins. *Org. Lett.* **15**, 1756-1759 (2013).
