# Supplementary material for: Quadruple C-H activation coupled to hydrofunctionalization and C-H silylation/borylation enabled by weakly coordinated palladium catalyst
Source: PubMed Central journal article supplement (PMC7652853; doi:10.1038/s41467-020-19508-z), 2020-11-09
Supplement: 41467_2020_19508_MOESM3_ESM.pdf [file 41467_2020_19508_MOESM3_ESM.pdf]

## Description of Additional Supplementary Files

File Name: Supplementary Data 1

Description: Computational details
